# Supplementary material for: Chemical genetics and proteome-wide site mapping reveal cysteine MARylation by PARP-7 on immune-relevant protein targets
Source: eLife journal article supplement (doi:10.7554/elife.60480), 2021-01-21
Supplement: supp [file elife-60480-supp-v1.zip]

| Enzyme                            | IC50 (μM)   |
|-----------------------------------|-------------|
| PARP-1 <sub>FL</sub>              | 0.021±0.004 |
| PARP-2 <sub>FL</sub>              | 0.028±0.005 |
| PARP-3 <sub>FL</sub>              | 0.32±0.002  |
| PARP-4 <sub>brct-cat</sub>        | 0.35±0.002  |
| PARP-5 <sub>b<sub>cat</sub></sub> | 2.52±0.2    |
| PARP-6 <sub>FL</sub>              | 0.18±0.05   |
| PARP-7 <sub>FL</sub>              | 0.014±0.002 |
| PARP-8 <sub>FL</sub>              | 4.7±1       |
| PARP-10 <sub>cat</sub>            | 0.86±0.3    |
| PARP-11 <sub>FL</sub>             | 0.46±0.02   |
| PARP-12 <sub>cat</sub>            | >3          |
| PARP-14 <sub>wwe-cat.</sub>       | >10         |
| PARP-15 <sub>cat</sub>            | 2.0±0.3     |
| PARP-16 <sub>FL</sub>             | 4.3±1       |
