# Supplementary material for: Chemical genetics and proteome-wide site mapping reveal cysteine MARylation by PARP-7 on immune-relevant protein targets
Source: eLife. 2021 Jan 21;10:e60480. doi: 10.7554/eLife.60480 (PMC7880690; doi:10.7554/eLife.60480)
Supplement: Supplementary file 1. — Tab 1: PARP-7 MARylation targets identified from HEK 293 T cell lysates using a chemical genetic approach. Tab 2: PARP-7 interactors identified from HEK 293 T cells using proximity labeling (BioID approach) Tab 3: reviGO analysis, related to Figure 1a. Tab 4: Metascape GO analysis, related to Figure 1b. Tab 5: ADP-ribosylation targets and sites identified from HEK 293 T cells expressing PARP-13.2 alone, PARP-7 alone, or PARP-13.2 and PARP-7. Tab 6: Number of cysteine sites per protein target, related to Figure 4d. [file elife-60480-supp1.xlsx]

## Sheet: S1 CG
		KEY	enriched in both repeats
			enriched only in repeat 1
		KEY	enriched in both repeats
			enriched only in repeat 1
			enriched only in repeat 2
Accession	Abbreviations	Protein Name	IG PARP7 Repeat 1	WT7 PARP7 Repeat 1	IG PARP7 Repeat 2	WT7 PARP7 Repeat 2	BirA list (enriched in at least one repeat set of samples)
Q7Z2W4	ZCCHV_HUMAN	Zinc finger CCCH-type antiviral protein 1	14	0	9	0	+
Q96S55	WRIP1_HUMAN	ATPase WRNIP1	10	0	20	0	+
Q02878	RL6_HUMAN	60S ribosomal protein	9	0	5	2	-
Q9H078	CLPB_HUMAN	Caseinolytic peptidase B protein homolog	9	0	7	0	-
P11940	PABP1_HUMAN	Polyadenylate-binding protein 1	8	0	6	0	+
Q8NCA5	FA98A_HUMAN	Protein FAM98A	6	0	7	0	-
P61313	RL15_HUMAN	60S ribosomal protein L15	5	0	4	0	-
P36578	RL4_HUMAN	60S ribosomal protein L4	5	0	4	0	-
P11586	C1TC_HUMAN	C-1-tetrahydrofolate synthase, cytoplasmic	5	0	9	1	+
P78527	PRKDC_HUMAN	DNA-dependent protein kinase catalytic subunit	5	0	12	0	+
P49411	EFTU_HUMAN	Elongation factor Tu, mitochondrial	5	0	5	2	-
Q6Y7W6	GGYF2_HUMAN	GRB10-interacting GYF protein 2	5	0	4	0	+
P22626	ROA2_HUMAN	Heterogeneous nuclear ribonucleoproteins A2/B1	5	0	3	0	-
P52292	IMA1_HUMAN	Importin subunit alpha-1	5	0	3	0	+
P20839	IMDH1_HUMAN	Inosine-5'-monophosphate dehydrogenase 1	5	0	5	1	+
P23368	MAOM_HUMAN	NAD-dependent malic enzyme, mitochondrial	5	0	9	0	-
O00746	NDKM_HUMAN	Nucleoside diphosphate kinase, mitochondrial	5	0	7	0	-
P08865	RSSA_HUMAN	40S ribosomal protein SA	4	0	3	0	+
P38159	RBMX_HUMAN	RNA-binding motif protein, X chromosome	4	0	4	0	-
P49368	TCPG_HUMAN	T-complex protein 1 subunit gamma	4	0	7	1	+
P55072	TERA_HUMAN	Transitional endoplasmic reticulum ATPase	4	0	8	1	+
P29401	TKT_HUMAN	Transketolase	4	0	11	1	-
P12956	XRCC6_HUMAN	X-ray repair cross-complementing protein 6	4	0	7	2	-
P62277	RS13_HUMAN	40S ribosomal protein S13	3	0	4	1	-
Q92499	DDX1_HUMAN	ATP-dependent RNA helicase DDX1	3	0	6	0	-
Q86VP6	CAND1_HUMAN	Cullin-associated NEDD8-dissociated protein 1	3	0	4	0	+
O43175	SERA_HUMAN	D-3-phosphoglycerate dehydrogenase	3	0	6	2	+
Q14974	IMB1_HUMAN	Importin subunit beta-1	3	0	3	0	+
P40926	MDHM_HUMAN	Malate dehydrogenase, mitochondrial	3	0	4	1	-
P22234	PUR6_HUMAN	Multifunctional protein ADE2	3	0	5	2	+
Q14697	GANAB_HUMAN	Neutral alpha-glucosidase AB	3	0	6	1	+
P18669	PGAM1_HUMAN	Phosphoglycerate mutase 1	3	0	4	1	-
P13797	PLST_HUMAN	Plastin-3	3	0	4	1	+
P55786	PSA_HUMAN	Puromycin-sensitive aminopeptidase	3	0	3	0	+
P63244	RACK1_HUMAN	Receptor of activated protein C kinase 1	3	0	6	1	+
P35637	FUS_HUMAN	RNA-binding protein FUS	3	0	2	0	-
P17987	TCPA_HUMAN	T-complex protein 1 subunit alpha	3	0	10	2	-
P40227	TCPZ_HUMAN	T-complex protein 1 subunit zeta	3	0	4	0	+
P63104	1433Z_HUMAN	14-3-3 protein zeta/delta	2	0	1	0	+
P62854	RS26_HUMAN	40S ribosomal protein S26	2	0	3	1	-
P23396	RS3_HUMAN	40S ribosomal protein S3	2	0	2	1	+
P62753	RS6_HUMAN	40S ribosomal protein S6	2	0	3	1	-
P26373	RL13_HUMAN	60S ribosomal protein L13	2	0	2	1	-
P18621	RL17_HUMAN	60S ribosomal protein L17	2	0	4	1	-
P32969	RL9_HUMAN	60S ribosomal protein L9	2	0	3	1	-
Q08211	DHX9_HUMAN	ATP-dependent RNA helicase A	2	0	4	0	+
P07814	SYEP_HUMAN	Bifunctional glutamate/proline--tRNA ligase	2	0	5	0	+
P27708	PYR1_HUMAN	CAD protein	2	0	4	0	+
Q9UJS0	CMC2_HUMAN	Calcium-binding mitochondrial carrier protein Aralar2	2	0	5	0	+
O60716	CTND1_HUMAN	Catenin delta-1	2	0	3	0	-
O75390	CISY_HUMAN	Citrate synthase, mitochondrial	2	0	2	0	-
P53621	COPA_HUMAN	Coatomer subunit alpha	2	0	3	0	+
Q14011	CIRBP_HUMAN	Cold-inducible RNA-binding protein	2	0	2	0	-
P31689	DNJA1_HUMAN	DnaJ homolog subfamily A member 1	2	0	2	0	+
Q7Z6Z7	HUWE1_HUMAN	E3 ubiquitin-protein ligase HUWE1	2	0	3	0	+
P14625	ENPL_HUMAN	Endoplasmin	2	0	7	1	+
O14980	XPO1_HUMAN	Exportin-1	2	0	3	0	+
P55060	XPO2_HUMAN	Exportin-2	2	0	6	1	-
P34932	HSP74_HUMAN	Heat shock 70 kDa protein 4	2	0	2	0	+
O60506	HNRPQ_HUMAN	Heterogeneous nuclear ribonucleoprotein Q	2	0	2	1	-
Q14739	LBR_HUMAN	Lamin-B receptor	2	0	2	0	+
P35579	MYH9_HUMAN	Myosin-9	2	0	10	1	+
P17844	DDX5_HUMAN	Probable ATP-dependent RNA helicase DDX5	2	0	8	1	+
P07237	PDIA1_HUMAN	Protein disulfide-isomerase	2	0	9	2	-
Q9BXP5	SRRT_HUMAN	Serrate RNA effector molecule homolog	2	0	2	0	-
P05023	AT1A1_HUMAN	Sodium/potassium-transporting ATPase subunit alpha-1	2	0	5	0	+
P78371	TCPB_HUMAN	T-complex protein 1 subunit beta	2	0	9	2	+
P27348	1433T_HUMAN	14-3-3 protein theta	1	0	2	0	+
Q92598	HS105_HUMAN	Heat shock protein 105 kDa	1	0	2	0	+
O00571	DDX3X_HUMAN	ATP-dependent RNA helicase DDX3X	57	1	36	2	+
Q7Z3E1	EXTRA_0001	[GFP-CO-IG-PARP7]	45	1	47	1	+
P38646	GRP75_HUMAN	Stress-70 protein, mitochondrial	7	1	7	1	+
P61978	HNRPK_HUMAN	Heterogeneous nuclear ribonucleoprotein K	6	1	4	2	-
Q00839	HNRPU_HUMAN	Heterogeneous nuclear ribonucleoprotein U	6	1	8	1	-
P50990	TCPQ_HUMAN	T-complex protein 1 subunit theta	5	1	7	2	+
P39023	RL3_HUMAN	60S ribosomal protein L3	4	1	3	1
P10412	H14_HUMAN	Histone H1.4	3	1	2	1	-
P10412	PGK1_HUMAN	Phosphoglycerate kinase 1	3	1	10	1	-
P62263	RS14_HUMAN	40S ribosomal protein S14	2	1	3	1	-
Q07020	RL18_HUMAN	60S ribosomal protein L18	2	1	5	1	-
P61353	RL27_HUMAN	60S ribosomal protein L27	2	1	2	1	-
P18077	RL35A_HUMAN	60S ribosomal protein L35a	2	1	4	2	-
P23528	COF1_HUMAN	Cofilin-1	2	1	4	2	+
P62424	RL7A_HUMAN	60S ribosomal protein L7a	10	2	7	0	-
P53396	ACLY_HUMAN	ATP-citrate synthase	7	2	9	1	+
P49327	FAS_HUMAN	Fatty acid synthase	18	0
P04083	ANXA1_HUMAN	Annexin A1	14	0
Q00610	CLH1_HUMAN	Clathrin heavy chain 1	10	0
P22314	UBA1_HUMAN	Ubiquitin-like modifier-activating enzyme 1	9	0
P04075	ALDOA_HUMAN	Fructose-bisphosphate aldolase A	6	0
P0CG47	UBB_HUMAN	Polyubiquitin-B	6	0
P62241	RS8_HUMAN	40S ribosomal protein S8	5	0
P11021	GRP78_HUMAN	78 kDa glucose-regulated protein	5	0
P62701	RS4X_HUMAN	40S ribosomal protein S4, X isoform	4	0
P09651	ROA1_HUMAN	Heterogeneous nuclear ribonucleoprotein A1	4	0
Q01844	EWS_HUMAN	RNA-binding protein EWS	4	0
P39019	RS19_HUMAN	40S ribosomal protein S19	3	0
P61247	RS3A_HUMAN	40S ribosomal protein S3a	3	0
P54886	P5CS_HUMAN	Delta-1-pyrroline-5-carboxylate synthase	3	0
P04843	RPN1_HUMAN	Dolichyl-diphosphooligosaccharide--protein glycosyltransferase subunit 1	3	0
P63241	IF5A1_HUMAN	Eukaryotic translation initiation factor 5A-1	3	0
P02788	TRFL_HUMAN	Lactotransferrin	3	0
Q9UQ80	PA2G4_HUMAN	Proliferation-associated protein 2G4	3	0
Q15084	PDIA6_HUMAN	Protein disulfide-isomerase A6	3	0
P05109	S10A8_HUMAN	Protein S100-A8	3	0
P06702	S10A9_HUMAN	Protein S100-A9	3	0
P50991	TCPD_HUMAN	T-complex protein 1 subunit delta	3	0
P46783	RS10_HUMAN	40S ribosomal protein S10	2	0
P62244	RS15A_HUMAN	40S ribosomal protein S15a	2	0
P05388	RLA0_HUMAN	60S acidic ribosomal protein P0	2	0
P30050	RL12_HUMAN	60S ribosomal protein L12	2	0
Q02543	RL18A_HUMAN	60S ribosomal protein L18a	2	0
P46778	RL21_HUMAN	60S ribosomal protein L21	2	0
P63173	RL38_HUMAN	60S ribosomal protein L38	2	0
P12236	ADT3_HUMAN	ADP/ATP translocase 3	2	0
O43707	ACTN4_HUMAN	Alpha-actinin-4	2	0
P00918	CAH2_HUMAN	Carbonic anhydrase 2	2	0
P29692	EF1D_HUMAN	Elongation factor 1-delta	2	0
Q92945	FUBP2_HUMAN	Far upstream element-binding protein 2	2	0
O95757	HS74L_HUMAN	Heat shock 70 kDa protein 4L	2	0
O14979	HNRDL_HUMAN	Heterogeneous nuclear ribonucleoprotein D-like	2	0
P31943	HNRH1_HUMAN	Heterogeneous nuclear ribonucleoprotein H	2	0
P59665	DEF1_HUMAN	Neutrophil defensin 1	2	0
P62937	PPIA_HUMAN	Peptidyl-prolyl cis-trans isomerase A	2	0
Q06830	PRDX1_HUMAN	Peroxiredoxin-1	2	0
P57721	PCBP3_HUMAN	Poly(rC)-binding protein 3	2	0
P35232	PHB_HUMAN	Prohibitin	2	0
Q52LJ0	FA98B_HUMAN	Protein FAM98B	2	0
P31150	GDIA_HUMAN	Rab GDP dissociation inhibitor alpha	2	0
P23246	SFPQ_HUMAN	Splicing factor, proline- and glutamine-rich	2	0
P30048	PRDX3_HUMAN	Thioredoxin-dependent peroxide reductase, mitochondrial	2	0
P21796	VDAC1_HUMAN	Voltage-dependent anion-selective channel protein 1	2	0
P26641	EF1G_HUMAN	Elongation factor 1-gamma	8	1
P60174	TPIS_HUMAN	Triosephosphate isomerase	8	1
P07737	PROF1_HUMAN	Profilin-1	4	1
P25705	ATPA_HUMAN	ATP synthase subunit alpha, mitochondrial	3	1
P62826	RAN_HUMAN	GTP-binding nuclear protein Ran	3	1
P19338	NUCL_HUMAN	Nucleolin	3	1
P10809	CH60_HUMAN	60 kDa heat shock protein, mitochondrial	13	2
P14618	KPYM_HUMAN	Pyruvate kinase PKM	13	2
P06733	ENOA_HUMAN	Alpha-enolase	11	2
P06733	RS11_HUMAN	40S ribosomal protein S11	6	2
P62269	RS18_HUMAN	40S ribosomal protein S18	6	2
P07195	LDHB_HUMAN	L-lactate dehydrogenase B chain	6	2
P15531	NDKA_HUMAN	Nucleoside diphosphate kinase A	6	2
P00338	LDHA_HUMAN	L-lactate dehydrogenase A chain	5	2
P62081	RS7_HUMAN	40S ribosomal protein S7	4	2
Q15029	U5S1_HUMAN	116 kDa U5 small nuclear ribonucleoprotein component			3	0
P62258	1433E_HUMAN	14-3-3 protein epsilon			3	1
P31947	1433S_HUMAN	14-3-3 protein sigma			4	0
Q9Y2R9	RT07_HUMAN	28S ribosomal protein S7, mitochondrial			2	0
Q9BUT1	BDH2_HUMAN	3-hydroxybutyrate dehydrogenase type 2			2	0
P15880	RS2_HUMAN	40S ribosomal protein S2			7	1
P62266	RS23_HUMAN	40S ribosomal protein S23			3	2
P46781	RS9_HUMAN	40S ribosomal protein S9			6	2
P27635	RL10_HUMAN	60S ribosomal protein L10			3	0
P62913	RL11_HUMAN	60S ribosomal protein L11			2	1
P40429	RL13A_HUMAN	60S ribosomal protein L13a			3	1
P83731	RL24_HUMAN	60S ribosomal protein L24			3	1
P46779	RL28_HUMAN	60S ribosomal protein L28			3	2
P46777	RL5_HUMAN	60S ribosomal protein L5			2	1
P18124	RL7_HUMAN	60S ribosomal protein L7			4	2
P62917	RL8_HUMAN	60S ribosomal protein L8			4	2
P24752	THIL_HUMAN	Acetyl-CoA acetyltransferase, mitochondrial			2	0
Q53H12	AGK_HUMAN	Acylglycerol kinase, mitochondrial			2	0
P23526	SAHH_HUMAN	Adenosylhomocysteinase			4	1
P54819	KAD2_HUMAN	Adenylate kinase 2, mitochondrial			2	0
P84077	ARF1_HUMAN	ADP-ribosylation factor 1			4	0
P61204	ARF3_HUMAN	ADP-ribosylation factor 3			4	0
P12814	ACTN1_HUMAN	Alpha-actinin-1			2	0
O43707	ACTN4_HUMAN	Alpha-actinin-4			2	0
P08758	ANXA5_HUMAN	Annexin A5			2	0
O95831	AIFM1_HUMAN	Apoptosis-inducing factor 1, mitochondrial			3	0
P54136	SYRC_HUMAN	Arginine--tRNA ligase, cytoplasmic			2	0
P06576	ATPB_HUMAN	ATP synthase subunit beta, mitochondrial			5	1
P36542	ATPG_HUMAN	ATP synthase subunit gamma, mitochondrial			2	1
P48047	ATPO_HUMAN	ATP synthase subunit O, mitochondrial			2	0
P31939	PUR9_HUMAN	Bifunctional purine biosynthesis protein PURH			3	1
Q9HB71	CYBP_HUMAN	Calcyclin-binding protein			2	0
P27482	CALL3_HUMAN	Calmodulin-like protein 3			2	0
O00299	CLIC1_HUMAN	Chloride intracellular channel protein 1			2	1
P22528	SPR1B_HUMAN	Cornifin-B			2	0
P04080	CYTB_HUMAN	Cystatin-B			2	1
Q14204	DYHC1_HUMAN	Cytoplasmic dynein 1 heavy chain 1			5	0
P28838	AMPL_HUMAN	Cytosol aminopeptidase			2	0
Q08554	DSC1_HUMAN	Desmocollin-1			2	0
Q02413	DSG1_HUMAN	Desmoglein-1			5	0
P09622	DLDH_HUMAN	Dihydrolipoyl dehydrogenase, mitochondrial			2	0
P33993	MCM7_HUMAN	DNA replication licensing factor MCM7			2	0
Q14669	TRIPC_HUMAN	E3 ubiquitin-protein ligase TRIP12			5	0
Q92616	GCN1_HUMAN	eIF-2-alpha kinase activator GCN1			3	0
P24534	EF1B_HUMAN	Elongation factor 1-beta			2	0
Q99613	EIF3C_HUMAN	Eukaryotic translation initiation factor 3 subunit C			2	0
B5ME19	EIFCL_HUMAN	Eukaryotic translation initiation factor 3 subunit C-like protein			2	0
Q9HAV4	XPO5_HUMAN	Exportin-5			2	0
Q01469	FABP5_HUMAN	Fatty acid-binding protein, epidermal			3	0
P47929	LEG7_HUMAN	Galectin-7			4	0
Q12931	TRAP1_HUMAN	Heat shock protein 75 kDa, mitochondrial			2	0
P04792	HSPB1_HUMAN	Heat shock protein beta-1			3	0
P51991	ROA3_HUMAN	Heterogeneous nuclear ribonucleoprotein A3			2	0
Q14103	HNRPD_HUMAN	Heterogeneous nuclear ribonucleoprotein D0			3	0
P52597	HNRPF_HUMAN	Heterogeneous nuclear ribonucleoprotein F			1	0
P31943	HNRH1_HUMAN	Heterogeneous nuclear ribonucleoprotein H			3	0
P52272	HNRPM_HUMAN	Heterogeneous nuclear ribonucleoprotein M			5	0
P62805	H4_HUMAN	Histone H4			3	1
Q86YZ3	HORN_HUMAN	Hornerin			4	2
Q8TEX9	IPO4_HUMAN	Importin-4			2	0
O00410	IPO5_HUMAN	Importin-5			3	0
Q15181	IPYR_HUMAN	Inorganic pyrophosphatase			3	0
O14654	IRS4_HUMAN	Insulin receptor substrate 4			3	0
P14923	PLAK_HUMAN	Junction plakoglobin			15	2
Q9P2J5	SYLC_HUMAN	Leucine--tRNA ligase, cytoplasmic			2	1
P42704	LPPRC_HUMAN	Leucine-rich PPR motif-containing protein, mitochondrial			8	0
Q02978	M2OM_HUMAN	Mitochondrial 2-oxoglutarate/malate carrier protein			2	0
P49321	NASP_HUMAN	Nuclear autoantigenic sperm protein			4	1
Q13232	NDK3_HUMAN	Nucleoside diphosphate kinase 3			2	0
P55209	NP1L1_HUMAN	Nucleosome assembly protein 1-like 1			1	0
Q99733	NP1L4_HUMAN	Nucleosome assembly protein 1-like 4			1	0
Q9NTK5	OLA1_HUMAN	Obg-like ATPase 1			2	0
P30041	PRDX6_HUMAN	Peroxiredoxin-6			10	0
Q00325	MPCP_HUMAN	Phosphate carrier protein, mitochondrial			3	1
Q13835	PKP1_HUMAN	Plakophilin-1			2	1
Q15365	PCBP1_HUMAN	Poly(rC)-binding protein 1			1	0
Q15366	PCBP2_HUMAN	Poly(rC)-binding protein 2			2	1
P26599	PTBP1_HUMAN	Polypyrimidine tract-binding protein 1			4	0
Q92841	DDX17_HUMAN	Probable ATP-dependent RNA helicase DDX17			4	0
Q86UW9	DTX2_HUMAN	Probable E3 ubiquitin-protein ligase DTX2			2	0
Q99623	PHB2_HUMAN	Prohibitin-2			3	1
P12004	PCNA_HUMAN	Proliferating cell nuclear antigen			3	0
P25789	PSA4_HUMAN	Proteasome subunit alpha type-4			3	0
P49721	PSB2_HUMAN	Proteasome subunit beta type-2			2	0
Q99873	ANM1_HUMAN	Protein arginine N-methyltransferase 1			2	0
A0A0A6YYL6	A0A0A6YYL6_HUMAN	Protein RPL17-C18orf32			4	1
Q08188	TGM3_HUMAN	Protein-glutamine gamma-glutamyltransferase E			2	0
P50395	GDIB_HUMAN	Rab GDP dissociation inhibitor beta			5	1
P51149	RAB7A_HUMAN	Ras-related protein Rab-7a			2	0
Q8IY67	RAVR1_HUMAN	Ribonucleoprotein PTB-binding 1			3	0
Q96PK6	RBM14_HUMAN	RNA-binding protein 14			7	0
Q13228	SBP1_HUMAN	Selenium-binding protein 1			2	0
P62314	SMD1_HUMAN	Small nuclear ribonucleoprotein Sm D1			2	0
P31948	STIP1_HUMAN	Stress-induced-phosphoprotein 1			3	0
P48643	TCPE_HUMAN	T-complex protein 1 subunit epsilon			6	1
Q9Y490	TLN1_HUMAN	Talin-1			4	0
P10599	THIO_HUMAN	Thioredoxin			4	0
P30048	PRDX3_HUMAN	Thioredoxin-dependent peroxide reductase, mitochondrial			3	1
P26639	SYTC_HUMAN	Threonine--tRNA ligase, cytoplasmic			4	1
P51571	SSRD_HUMAN	Translocon-associated protein subunit delta			2	0
Q92973	TNPO1_HUMAN	Transportin-1			2	0
P22102	PUR2_HUMAN	Trifunctional purine biosynthetic protein adenosine-3			5	1
P06753	TPM3_HUMAN	Tropomyosin alpha-3 chain			2	0
O75643	U520_HUMAN	U5 small nuclear ribonucleoprotein 200 kDa helicase			2	0
H7C0C1	H7C0C1_HUMAN	Uncharacterized protein (Fragment)			2	0
F5H423	F5H423_HUMAN	Uncharacterized protein			4	0
P18206	VINC_HUMAN	Vinculin			2	0
P45880	VDAC2_HUMAN	Voltage-dependent anion-selective channel protein 2			3	0
Q9Y277	VDAC3_HUMAN	Voltage-dependent anion-selective channel protein 3			3	1

## Sheet:  S2 BioID
Accession	Abbreviation	Description	PARP7-GFP2 peptide counts	PARP7-GFP1 peptide counts	PARP7 birA2 peptide counts	PARP7 birA1 peptide counts
P12270	TPR_HUMAN	Nucleoprotein TPR	0	0	95	107
Q14008	CKAP5_HUMAN	Isoform 2 of Cytoskeleton-associated protein 5	0	0	22	21
P49792	RBP2_HUMAN	E3 SUMO-protein ligase RanBP2	0	0	20	21
Q7Z6Z7	HUWE1_HUMAN	Isoform 2 of E3 ubiquitin-protein ligase HUWE1	0	0	22	15
P51610	HCFC1_HUMAN	Isoform 4 of Host cell factor 1	0	0	11	15
Q86T24	KAISO_HUMAN	Transcriptional regulator Kaiso	0	0	10	15
Q9ULM3	YETS2_HUMAN	YEATS domain-containing protein 2	0	0	22	14
P49959	MRE11_HUMAN	Isoform 2 of Double-strand break repair protein MRE11	0	0	13	14
Q6Y7W6	GGYF2_HUMAN	Isoform 3 of GRB10-interacting GYF protein 2	0	0	11	14
Q9HCK8	CHD8_HUMAN	Chromodomain-helicase-DNA-binding protein 8	0	0	11	13
P20839	IMDH1_HUMAN	Isoform 3 of Inosine-5'-monophosphate dehydrogenase 1	0	0	12	12
Q92793	CBP_HUMAN	CREB-binding protein	0	0	9	11
Q96S55	WRIP1_HUMAN	Isoform 2 of ATPase WRNIP1	0	0	10	10
Q5VUA4	ZN318_HUMAN	Zinc finger protein 318	0	0	13	9
O60885	BRD4_HUMAN	Bromodomain-containing protein 4	0	0	8	9
P46108	CRK_HUMAN	Adapter molecule crk	0	0	7	9
Q9Y490	TLN1_HUMAN	Talin-1	0	0	7	9
P46108	CRK_HUMAN	Isoform Crk-I of Adapter molecule crk	0	0	6	9
Q14247	SRC8_HUMAN	Src substrate cortactin	0	0	10	8
Q9BR76	COR1B_HUMAN	Coronin-1B	0	0	7	8
Q96QC0	PP1RA_HUMAN	Serine/threonine-protein phosphatase 1 regulatory subunit 10	0	0	5	8
O94842	TOX4_HUMAN	Isoform 2 of TOX high mobility group box family member 4	0	0	8	7
Q09472	EP300_HUMAN	Histone acetyltransferase p300	0	0	8	7
P46109	CRKL_HUMAN	Crk-like protein	0	0	6	7
Q13200	PSMD2_HUMAN	26S proteasome non-ATPase regulatory subunit 2	0	0	6	7
Q4VCS5	AMOT_HUMAN	Angiomotin	0	0	6	7
Q8IYH5	ZZZ3_HUMAN	Isoform 2 of ZZ-type zinc finger-containing protein 3	0	0	6	7
P45880	VDAC2_HUMAN	Isoform 1 of Voltage-dependent anion-selective channel protein 2	3	0	5	7
P55786	PSA_HUMAN	Puromycin-sensitive aminopeptidase	3	0	9	6
P78344	IF4G2_HUMAN	Eukaryotic translation initiation factor 4 gamma 2	0	0	7	6
Q14152	EIF3A_HUMAN	Isoform 2 of Eukaryotic translation initiation factor 3 subunit A	2	0	7	6
O75182	SIN3B_HUMAN	Isoform 2 of Paired amphipathic helix protein Sin3b	0	0	4	6
P55196	AFAD_HUMAN	Isoform 5 of Afadin	0	0	1	6
Q9ULH7	MKL2_HUMAN	Isoform 4 of MKL/myocardin-like protein 2	0	0	8	5
P62191	PRS4_HUMAN	26S proteasome regulatory subunit 4	1	0	6	5
P35606	COPB2_HUMAN	Isoform 2 of Coatomer subunit beta'	1	0	4	5
P35658	NU214_HUMAN	Isoform 2 of Nuclear pore complex protein Nup214	0	0	4	5
Q9Y508	RN114_HUMAN	E3 ubiquitin-protein ligase RNF114	0	0	4	5
Q9Y5Q9	TF3C3_HUMAN	General transcription factor 3C polypeptide 3	0	0	4	5
P26640	SYVC_HUMAN	Valine--tRNA ligase	0	0	2	5
Q9Y5K6	CD2AP_HUMAN	CD2-associated protein	0	0	7	4
Q13501	SQSTM_HUMAN	Sequestosome-1	0	0	6	4
Q8IX01	SUGP2_HUMAN	Isoform of Q8IX01, Isoform 3 of SURP and G-patch domain-containing protein 2	0	0	6	4
O43396	TXNL1_HUMAN	Thioredoxin-like protein 1	0	0	5	4
O75663	TIPRL_HUMAN	Isoform 2 of TIP41-like protein	1	0	5	4
P55010	IF5_HUMAN	Eukaryotic translation initiation factor 5	0	0	5	4
Q14677	EPN4_HUMAN	Isoform 3 of Clathrin interactor 1	0	0	5	4
Q9NTJ3	SMC4_HUMAN	Structural maintenance of chromosomes protein 4	0	0	5	4
P62195	PRS8_HUMAN	Isoform 2 of 26S proteasome regulatory subunit 8	0	0	4	4
Q15233	NONO_HUMAN	Isoform 2 of Non-POU domain-containing octamer-binding protein	1	0	4	4
Q93009	UBP7_HUMAN	Isoform 3 of Ubiquitin carboxyl-terminal hydrolase 7	0	0	4	4
Q96RU2	UBP28_HUMAN	Isoform 2 of Ubiquitin carboxyl-terminal hydrolase 28	0	0	4	4
O75179	ANR17_HUMAN	Isoform 2 of Ankyrin repeat domain-containing protein 17	0	0	3	4
P04818	TYSY_HUMAN	Isoform 2 of Thymidylate synthase	1	0	3	4
Q15813	TBCE_HUMAN	Isoform 2 of Tubulin-specific chaperone E	0	0	3	4
Q7L2H7	EIF3M_HUMAN	Eukaryotic translation initiation factor 3 subunit M	1	0	3	4
Q86UW9	DTX2_HUMAN	Isoform 2 of Probable E3 ubiquitin-protein ligase DTX2	0	0	3	4
Q8IWZ3	ANKH1_HUMAN	Isoform 4 of Ankyrin repeat and KH domain-containing protein 1	0	0	3	4
Q96EB1	ELP4_HUMAN	Isoform 2 of Elongator complex protein 4	0	0	3	4
Q9Y5V3	MAGD1_HUMAN	Isoform 2 of Melanoma-associated antigen D1	0	0	3	4
E9PAV3	NACAM_HUMAN	Isoform 2 of Nascent polypeptide-associated complex subunit alpha, muscle-specific form	0	0	2	4
P40763	STAT3_HUMAN	Isoform Del-701 of Signal transducer and activator of transcription 3	0	0	2	4
Q7Z2W4	ZCCHV_HUMAN	Zinc finger CCCH-type antiviral protein 1	0	0	2	4
Q13596	SNX1_HUMAN	Isoform 1A of Sorting nexin-1	0	0	1	4
Q9UM54	MYO6_HUMAN	Isoform 6 of Unconventional myosin-VI	0	0	1	4
O15042	SR140_HUMAN	Isoform 2 of U2 snRNP-associated SURP motif-containing protein	0	0	6	3
Q9Y4E8	UBP15_HUMAN	Isoform 2 of Ubiquitin carboxyl-terminal hydrolase 15	0	0	6	3
O60573	IF4E2_HUMAN	Eukaryotic translation initiation factor 4E type 2	0	0	5	3
Q96JH7	VCIP1_HUMAN	Deubiquitinating protein VCIP135	0	0	5	3
Q9C0C9	UBE2O_HUMAN	(E3-independent) E2 ubiquitin-conjugating enzyme	0	0	4	3
O75533	SF3B1_HUMAN	Splicing factor 3B subunit 1	0	0	3	3
Q0PNE2	ELP6_HUMAN	Isoform 2 of Elongator complex protein 6	0	0	3	3
Q14157	UBP2L_HUMAN	Isoform 2 of Ubiquitin-associated protein 2-like	0	0	3	3
Q9H3U1	UN45A_HUMAN	Isoform 2 of Protein unc-45 homolog A	0	0	3	3
P15311	EZRI_HUMAN	Ezrin	0	0	2	3
P49321	NASP_HUMAN	Isoform of P49321, Isoform 3 of Nuclear autoantigenic sperm protein	0	0	2	3
P52732	KIF11_HUMAN	Kinesin-like protein KIF11	0	0	2	3
P61289	PSME3_HUMAN	Isoform 2 of Proteasome activator complex subunit 3	0	0	2	3
Q13325	IFIT5_HUMAN	Isoform 2 of Interferon-induced protein with tetratricopeptide repeats 5	0	0	2	3
Q6NZY4	ZCHC8_HUMAN	Zinc finger CCHC domain-containing protein 8	0	0	2	3
Q8WXI9	P66B_HUMAN	Transcriptional repressor p66-beta	0	0	2	3
Q9H5V9	CX056_HUMAN	Isoform 2 of UPF0428 protein CXorf56	0	0	2	3
Q9UHR5	S30BP_HUMAN	Isoform 2 of SAP30-binding protein	0	0	2	3
Q9UJS0	CMC2_HUMAN	Isoform 2 of Calcium-binding mitochondrial carrier protein Aralar2	1	0	2	3
O75376	NCOR1_HUMAN	Nuclear receptor corepressor 1	0	0	1	3
P25685	DNJB1_HUMAN	Isoform 2 of DnaJ homolog subfamily B member 1	0	0	1	3
Q13347	EIF3I_HUMAN	Eukaryotic translation initiation factor 3 subunit I	0	0	1	3
Q8IVW6	ARI3B_HUMAN	Isoform 3 of AT-rich interactive domain-containing protein 3B	0	0	1	3
Q8TD19	NEK9_HUMAN	Serine/threonine-protein kinase Nek9	0	0	1	3
Q96EA4	SPDLY_HUMAN	Isoform 2 of Protein Spindly	0	0	1	3
Q9BZZ5	API5_HUMAN	Isoform 2 of Apoptosis inhibitor 5	0	0	1	3
P49419	AL7A1_HUMAN	Isoform 2 of Alpha-aminoadipic semialdehyde dehydrogenase	0	0	0	3
P49915	GUAA_HUMAN	GMP synthase [glutamine-hydrolyzing]	0	0	0	3
P62314	SMD1_HUMAN	Small nuclear ribonucleoprotein Sm D1	0	0	0	3
Q5SW79	CE170_HUMAN	Isoform 2 of Centrosomal protein of 170 kDa	0	0	0	3
Q8TEX9	IPO4_HUMAN	Isoform 2 of Importin-4	0	0	0	3
A5YKK6	CNOT1_HUMAN	Isoform 2 of CCR4-NOT transcription complex subunit 1	0	0	4	2
P09960	LKHA4_HUMAN	Isoform 2 of Leukotriene A-4 hydrolase	1	0	4	2
Q16531	DDB1_HUMAN	DNA damage-binding protein 1	0	0	4	2
Q16637	SMN_HUMAN	Isoform SMN-delta7 of Survival motor neuron protein	1	0	4	2
Q8WUM4	PDC6I_HUMAN	Isoform 2 of Programmed cell death 6-interacting protein	1	0	4	2
Q9Y266	NUDC_HUMAN	Nuclear migration protein nudC	0	0	4	2
Q9Y3F4	STRAP_HUMAN	Isoform 2 of Serine-threonine kinase receptor-associated protein	0	0	4	2
O95292	VAPB_HUMAN	Vesicle-associated membrane protein-associated protein B/C	0	0	3	2
O95347	SMC2_HUMAN	Structural maintenance of chromosomes protein 2	0	0	3	2
O95817	BAG3_HUMAN	BAG family molecular chaperone regulator 3	0	0	3	2
O95905	ECD_HUMAN	Isoform 2 of Protein ecdysoneless homolog	0	0	3	2
P08758	ANXA5_HUMAN	Annexin A5	0	0	3	2
Q8IZH2	XRN1_HUMAN	Isoform of Q8IZH2, Isoform 2 of 5'-3' exoribonuclease 1	0	0	3	2
Q8N0X7	SPART_HUMAN	Spartin	0	0	3	2
Q92900	RENT1_HUMAN	Isoform 2 of Regulator of nonsense transcripts 1	0	0	3	2
Q99460	PSMD1_HUMAN	Isoform 2 of 26S proteasome non-ATPase regulatory subunit 1	0	0	3	2
Q9UNZ2	NSF1C_HUMAN	Isoform 2 of NSFL1 cofactor p47	0	0	3	2
O00505	IMA4_HUMAN	Importin subunit alpha-4	0	0	2	2
O95163	ELP1_HUMAN	Elongator complex protein 1	0	0	2	2
P05386	RLA1_HUMAN	60S acidic ribosomal protein P1	0	0	2	2
P28482	MK01_HUMAN	Mitogen-activated protein kinase 1	0	0	2	2
P49189	AL9A1_HUMAN	Isoform 2 of 4-trimethylaminobutyraldehyde dehydrogenase	0	0	2	2
P52294	IMA5_HUMAN	Importin subunit alpha-5	0	0	2	2
Q09666	AHNK_HUMAN	Neuroblast differentiation-associated protein AHNAK	0	0	2	2
Q12789	TF3C1_HUMAN	Isoform 2 of General transcription factor 3C polypeptide 1	0	0	2	2
Q13620	CUL4B_HUMAN	Isoform 2 of Cullin-4B	0	0	2	2
Q15652	JHD2C_HUMAN	Isoform 2 of Probable JmjC domain-containing histone demethylation protein 2C	0	0	2	2
Q15843	NEDD8_HUMAN	NEDD8	0	0	2	2
Q5T8P6	RBM26_HUMAN	Isoform 2 of RNA-binding protein 26	0	0	2	2
Q6ZTW0	TPGS1_HUMAN	Isoform 2 of Tubulin polyglutamylase complex subunit 1	0	0	2	2
Q8WVC6	DCAKD_HUMAN	Dephospho-CoA kinase domain-containing protein	0	0	2	2
Q92973	TNPO1_HUMAN	Isoform 2 of Transportin-1	0	0	2	2
Q99615	DNJC7_HUMAN	Isoform 2 of DnaJ homolog subfamily C member 7	0	0	2	2
Q9H2G2	SLK_HUMAN	Isoform 2 of STE20-like serine/threonine-protein kinase	0	0	2	2
Q9H3N1	TMX1_HUMAN	Thioredoxin-related transmembrane protein 1	0	0	2	2
Q9NRN7	ADPPT_HUMAN	L-aminoadipate-semialdehyde dehydrogenase-phosphopantetheinyl transferase	0	0	2	2
Q9UHD2	TBK1_HUMAN	Serine/threonine-protein kinase TBK1	0	0	2	2
Q9UJ70	NAGK_HUMAN	Isoform 2 of N-acetyl-D-glucosamine kinase	0	0	2	2
Q9UPN9	TRI33_HUMAN	Isoform Beta of E3 ubiquitin-protein ligase TRIM33	0	0	2	2
Q9Y4P8	WIPI2_HUMAN	Isoform 2 of WD repeat domain phosphoinositide-interacting protein 2	0	0	2	2
Q9Y520	PRC2C_HUMAN	Isoform 3 of Protein PRRC2C	0	0	2	2
O14641	DVL2_HUMAN	Segment polarity protein dishevelled homolog DVL-2	0	0	1	2
O15173	PGRC2_HUMAN	Isoform 2 of Membrane-associated progesterone receptor component 2	0	0	1	2
P00492	HPRT_HUMAN	Hypoxanthine-guanine phosphoribosyltransferase	0	0	1	2
P27816	MAP4_HUMAN	Isoform 6 of Microtubule-associated protein 4	0	0	1	2
P33240	CSTF2_HUMAN	Isoform 2 of Cleavage stimulation factor subunit 2	0	0	1	2
P37802	TAGL2_HUMAN	Isoform 2 of Transgelin-2	0	0	1	2
P61758	PFD3_HUMAN	Prefoldin subunit 3	0	0	1	2
P62333	PRS10_HUMAN	26S proteasome regulatory subunit 10B	0	0	1	2
Q12904	AIMP1_HUMAN	Isoform 2 of Aminoacyl tRNA synthase complex-interacting multifunctional protein 1	0	0	1	2
Q13098	CSN1_HUMAN	Isoform 4 of COP9 signalosome complex subunit 1	0	0	1	2
Q8IUD2	RB6I2_HUMAN	Isoform 2 of ELKS/Rab6-interacting/CAST family member 1	0	0	1	2
Q8NG31	KNL1_HUMAN	Isoform 2 of Kinetochore scaffold 1	0	0	1	2
Q8TC07	TBC15_HUMAN	Isoform 2 of TBC1 domain family member 15	0	0	1	2
Q8WUM0	NU133_HUMAN	Nuclear pore complex protein Nup133	0	0	1	2
Q92769	HDAC2_HUMAN	Isoform 2 of Histone deacetylase 2	0	0	1	2
Q96I25	SPF45_HUMAN	Splicing factor 45	0	0	1	2
Q9H7D7	WDR26_HUMAN	Isoform 2 of WD repeat-containing protein 26	0	0	1	2
Q9NPI6	DCP1A_HUMAN	Isoform 2 of mRNA-decapping enzyme 1A	0	0	1	2
Q9Y4C2	TCAF1_HUMAN	Isoform 2 of TRPM8 channel-associated factor 1	0	0	1	2
Q99714	HCD2_HUMAN	3-hydroxyacyl-CoA dehydrogenase type-2	1	1	15	19
P08670	VIME_HUMAN	Vimentin	2	1	11	15
O00410	IPO5_HUMAN	Isoform 3 of Importin-5	2	1	16	14
P46060	RAGP1_HUMAN	Ran GTPase-activating protein 1	2	1	13	14
Q92616	GCN1_HUMAN	eIF-2-alpha kinase activator GCN1	0	1	12	12
Q04637	IF4G1_HUMAN	Isoform B of Eukaryotic translation initiation factor 4 gamma 1	2	1	8	11
P33991	MCM4_HUMAN	DNA replication licensing factor MCM4	0	1	9	7
P61106	RAB14_HUMAN	Ras-related protein Rab-14	2	1	9	7
O75369	FLNB_HUMAN	Isoform of O75369, Isoform 2 of Filamin-B	1	1	7	7
O00232	PSD12_HUMAN	26S proteasome non-ATPase regulatory subunit 12	3	1	6	7
Q6P2Q9	PRP8_HUMAN	Pre-mRNA-processing-splicing factor 8	7	2	22	19
Q14839	CHD4_HUMAN	Isoform 2 of Chromodomain-helicase-DNA-binding protein 4	1	2	7	11
O14654	IRS4_HUMAN	Insulin receptor substrate 4	1	2	14	10
P26196	DDX6_HUMAN	Probable ATP-dependent RNA helicase DDX6	1	2	6	9
Q9Y262	EIF3L_HUMAN	Eukaryotic translation initiation factor 3 subunit L	4	2	10	6
P12268	IMDH2_HUMAN	Inosine-5'-monophosphate dehydrogenase 2	6	3	37	45
P26641	EF1G_HUMAN	Isoform 2 of Elongation factor 1-gamma	5	3	10	10
P31689	DNJA1_HUMAN	DnaJ homolog subfamily A member 1	2	3	8	10
P04843	RPN1_HUMAN	Dolichyl-diphosphooligosaccharide--protein glycosyltransferase subunit 1	4	3	12	9
P04843	DHX9_HUMAN	ATP-dependent RNA helicase A	5	3	9	7
P27708	PYR1_HUMAN	CAD protein	2	3	12	6
P21333	FLNA_HUMAN	Isoform 2 of Filamin-A	11	4	86	92
P33993	MCM7_HUMAN	DNA replication licensing factor MCM7	8	4	14	10
Q99832	TCPH_HUMAN	Isoform of Q99832, Isoform 3 of T-complex protein 1 subunit eta	8	5	19	19
P11586	C1TC_HUMAN	C-1-tetrahydrofolate synthase, cytoplasmic	7	5	16	13
P50990	TCPQ_HUMAN	T-complex protein 1 subunit theta	8	6	24	22
P35579	MYH9_HUMAN	Myosin-9	4	8	32	28
O00571	DDX3X_HUMAN	Isoform 2 of ATP-dependent RNA helicase DDX3X	9	8	15	19
Q7Z3E1	Extra_001|BirA_PARP7.		31	11	165	171
P49327	FAS_HUMAN	Fatty acid synthase	20	17	94	86
Q14008	CKAP5_HUMAN	Isoform 3 of Cytoskeleton-associated protein 5	0	0	22	21
Q14008	CKAP5_HUMAN	Cytoskeleton-associated protein 5	0	0	22	21
P51610	HCFC1_HUMAN	Host cell factor 1	0	0	11	15
A6NEM2	A6NEM2_HUMAN	Host cell factor 1	0	0	11	15
P49959	MRE11_HUMAN	Isoform 3 of Double-strand break repair protein MRE11	0	0	13	14
P49959	MRE11_HUMAN	Double-strand break repair protein MRE11	0	0	13	14
F8W7U8	F8W7U8_HUMAN	Double-strand break repair protein MRE11	0	0	13	14
Q6Y7W6	GGYF2_HUMAN	Isoform 4 of GRB10-interacting GYF protein 2	0	0	11	14
Q6Y7W6	GGYF2_HUMAN	GRB10-interacting GYF protein 2	0	0	11	14
P20839	IMDH1_HUMAN	Isoform 5 of Inosine-5'-monophosphate dehydrogenase 1	0	0	12	12
P20840	IMDH1_HUMAN	Isoform 6 of Inosine-5'-monophosphate dehydrogenase 1	0	0	12	12
P20841	IMDH1_HUMAN	Isoform 7 of Inosine-5'-monophosphate dehydrogenase 1	0	0	12	12
P20842	IMDH1_HUMAN	Inosine-5'-monophosphate dehydrogenase 1	0	0	12	12
Q96S55	WRIP1_HUMAN	ATPase WRNIP1	0	0	10	10
O94842	TOX4_HUMAN	Isoform 3 of TOX high mobility group box family member 4	0	0	8	7
O94842	TOX4_HUMAN	TOX high mobility group box family member 4	0	0	8	7
Q8IYH5	ZZZ3_HUMAN	ZZ-type zinc finger-containing protein 3	0	0	6	7
D3DQV9	D3DQV9_HUMAN	Eukaryotic translation initiation factor 4 gamma 2 (Fragment)	0	0	7	6
O75182	SIN3B_HUMAN	Paired amphipathic helix protein Sin3b	0	0	4	6
	sp|O00410|IPO5_HUMAN	Importin-5 OS=Homo sapiens GN=IPO5 PE=1 SV=4	2	1	16	14
sp|O00410|IPO5_HUMAN	sp|Q04637-4|IF4G1_HUMAN	Isoform of Q04637, Isoform C of Eukaryotic translation initiation factor 4 gamma 1 OS=Homo sapiens GN=EIF4G1	2	1	8	11
sp|Q04637-4|IF4G1_HUMAN	sp|Q04637-5|IF4G1_HUMAN	Isoform of Q04637, Isoform D of Eukaryotic translation initiation factor 4 gamma 1 OS=Homo sapiens GN=EIF4G1	2	1	8	11
sp|Q04637-5|IF4G1_HUMAN	sp|Q04637-8|IF4G1_HUMAN	Isoform of Q04637, Isoform 8 of Eukaryotic translation initiation factor 4 gamma 1 OS=Homo sapiens GN=EIF4G1	2	1	8	11
sp|Q04637-8|IF4G1_HUMAN	sp|Q04637-9|IF4G1_HUMAN	Isoform of Q04637, Isoform 9 of Eukaryotic translation initiation factor 4 gamma 1 OS=Homo sapiens GN=EIF4G1	2	1	8	11
sp|Q04637-9|IF4G1_HUMAN	sp|Q04637|IF4G1_HUMAN	Eukaryotic translation initiation factor 4 gamma 1 OS=Homo sapiens GN=EIF4G1 PE=1 SV=4	2	1	8	11
sp|Q04637|IF4G1_HUMAN	tr|E7EUU4|E7EUU4_HUMAN	Isoform of Q04637, Eukaryotic translation initiation factor 4 gamma 1 OS=Homo sapiens GN=EIF4G1 PE=1 SV=1	2	1	8	11
tr|E7EUU4|E7EUU4_HUMAN	tr|E7EX73|E7EX73_HUMAN	Isoform of Q04637, Eukaryotic translation initiation factor 4 gamma 1 OS=Homo sapiens GN=EIF4G1 PE=1 SV=1	2	1	8	11
tr|E7EX73|E7EX73_HUMAN	tr|E9PGM1|E9PGM1_HUMAN	Isoform of Q04637, Eukaryotic translation initiation factor 4 gamma 1 OS=Homo sapiens GN=EIF4G1 PE=1 SV=1	2	1	8	11
tr|E9PGM1|E9PGM1_HUMAN	sp|P78347-3|GTF2I_HUMAN	Isoform of P78347, Isoform 3 of General transcription factor II-I OS=Homo sapiens GN=GTF2I	3	1	7	9
sp|P78347-3|GTF2I_HUMAN	sp|P78347-4|GTF2I_HUMAN	Isoform of P78347, Isoform 4 of General transcription factor II-I OS=Homo sapiens GN=GTF2I	3	1	7	9
sp|P78347-4|GTF2I_HUMAN	sp|P78347|GTF2I_HUMAN	General transcription factor II-I OS=Homo sapiens GN=GTF2I PE=1 SV=2	3	1	7	9
sp|P78347|GTF2I_HUMAN
	sp|Q92598|HS105_HUMAN	Heat shock protein 105 kDa OS=Homo sapiens GN=HSPH1 PE=1 SV=1	8	2	12	12
sp|Q92598|HS105_HUMAN	sp|Q14839|CHD4_HUMAN	Chromodomain-helicase-DNA-binding protein 4 OS=Homo sapiens GN=CHD4 PE=1 SV=2	1	2	7	11
sp|Q14839|CHD4_HUMAN	tr|A0A0C4DGG9|A0A0C4DGG9_HUMAN	Isoform of Q14839, Chromodomain-helicase-DNA-binding protein 4 OS=Homo sapiens GN=CHD4 PE=1 SV=1	1	2	7	11
tr|A0A0C4DGG9|A0A0C4DGG9_HUMAN	tr|F5GWX5|F5GWX5_HUMAN	Isoform of Q14839, Chromodomain-helicase-DNA-binding protein 4 OS=Homo sapiens GN=CHD4 PE=1 SV=1	1	2	7	11
tr|F5GWX5|F5GWX5_HUMAN
	tr|B0QY89|B0QY89_HUMAN	Isoform of Q9Y262, Eukaryotic translation initiation factor 3 subunit L OS=Homo sapiens GN=EIF3L PE=1 SV=1	4	2	10	6
tr|B0QY89|B0QY89_HUMAN
	sp|P21333|FLNA_HUMAN	Filamin-A OS=Homo sapiens GN=FLNA PE=1 SV=4	11	4	86	92
sp|P21333|FLNA_HUMAN

## Sheet: S3 reviGO analysis Fig 1a
term_ID	description	frequency	plot_X	plot_Y	plot_size	log10 p-value	uniqueness	dispensability	representative	eliminated
GO:0016032	viral process	0.04091	3.076	-3.379	2.851	-58.2022	0.952	0	16032	0
GO:0044403	symbiosis, encompassing mutualism through parasitism	0.04322	null	null	2.875	-58.1009	0.956	0.948	16032	1
GO:0044419	interspecies interaction between organisms	0.04334	null	null	2.876	-57.0505	0.964	0.659	16032	1
GO:0016071	mRNA metabolic process	0.03935	-7.165	4.6	2.834	-56.5069	0.831	0.003	16071	0
GO:0006402	mRNA catabolic process	0.01316	null	null	2.36	-52.9428	0.796	0.887	34655	1
GO:0034655	nucleobase-containing compound catabolic process	0.02198	-4.739	4.904	2.582	-51.6188	0.811	0.205	34655	0
GO:0006401	RNA catabolic process	0.01483	null	null	2.412	-51.3494	0.805	0.9	34655	1
GO:0043604	amide biosynthetic process	0.04264	null	null	2.869	-49.5783	0.802	0.85	6412	1
GO:0006412	translation	0.03693	-6.896	3.368	2.807	-49.1664	0.764	0.188	6412	0
GO:0006413	translational initiation	0.01108	null	null	2.286	-48.8133	0.797	0.804	6412	1
GO:0046700	heterocycle catabolic process	0.02464	null	null	2.631	-48.7539	0.835	0.575	34655	1
GO:0044270	cellular nitrogen compound catabolic process	0.02481	null	null	2.634	-48.6967	0.833	0.585	34655	1
GO:0043043	peptide biosynthetic process	0.03832	null	null	2.823	-48.6167	0.782	0.921	6412	1
GO:0072594	establishment of protein localization to organelle	0.03837	5.371	-3.274	2.823	-48.1435	0.818	0	72594	0
GO:0019439	aromatic compound catabolic process	0.0255	null	null	2.646	-47.8509	0.835	0.588	34655	1
GO:0034641	cellular nitrogen compound metabolic process	0.37432	-7.156	-0.692	3.812	-47.7639	0.815	0.26	34641	0
GO:1901361	organic cyclic compound catabolic process	0.02706	null	null	2.672	-46.0103	0.845	0.533	34655	1
GO:0000184	nuclear-transcribed mRNA catabolic process, nonsense-mediated decay	0.00698	null	null	2.086	-45.5456	0.81	0.893	34655	1
GO:0006518	peptide metabolic process	0.04599	null	null	2.902	-44.1149	0.811	0.88	6412	1
GO:0006614	SRP-dependent cotranslational protein targeting to membrane	0.00537	null	null	1.973	-43.0553	0.79	0.655	72594	1
GO:0043603	cellular amide metabolic process	0.05488	-5.547	5.118	2.979	-42.8268	0.862	0.282	43603	0
GO:0006613	cotranslational protein targeting to membrane	0.00571	null	null	2	-41.8567	0.806	0.86	72594	1
GO:0045047	protein targeting to ER	0.00589	null	null	2.013	-41.4389	0.837	0.978	72594	1
GO:1901566	organonitrogen compound biosynthetic process	0.08211	null	null	3.154	-40.922	0.804	0.603	6412	1
GO:0006139	nucleobase-containing compound metabolic process	0.33601	null	null	3.765	-40.6562	0.782	0.528	34641	1
GO:0072599	establishment of protein localization to endoplasmic reticulum	0.00612	null	null	2.029	-40.6082	0.844	0.944	72594	1
GO:0019080	viral gene expression	0.00964	null	null	2.225	-40.5359	0.888	0.956	16032	1
GO:0033365	protein localization to organelle	0.05303	null	null	2.964	-39.9503	0.831	0.689	72594	1
GO:0046483	heterocycle metabolic process	0.34576	-4.444	-6.278	3.778	-39.5275	0.896	0.098	46483	0
GO:0006725	cellular aromatic compound metabolic process	0.34801	-4.413	-6.147	3.78	-38.2351	0.896	0.199	6725	0
GO:0070972	protein localization to endoplasmic reticulum	0.00739	null	null	2.111	-37.5682	0.851	0.681	72594	1
GO:0019083	viral transcription	0.009	null	null	2.196	-37.4928	0.801	0.774	16032	1
GO:0006886	intracellular protein transport	0.06145	null	null	3.028	-37.3184	0.816	0.741	72594	1
GO:0044271	cellular nitrogen compound biosynthetic process	0.28696	-7.691	0.466	3.697	-37.0609	0.779	0.491	44271	0
GO:1901360	organic cyclic compound metabolic process	0.35978	-3.804	-5.62	3.795	-37.0126	0.909	0.146	1901360	0
GO:0000956	nuclear-transcribed mRNA catabolic process	0.01206	null	null	2.322	-36.4872	0.798	0.948	34655	1
GO:0044265	cellular macromolecule catabolic process	0.05568	null	null	2.985	-35.7993	0.854	0.792	34655	1
GO:1901576	organic substance biosynthetic process	0.36451	null	null	3.801	-35.4369	0.838	0.557	44271	1
GO:0009058	biosynthetic process	0.36924	-3.172	-7.003	3.806	-34.4544	0.916	0.151	9058	0
GO:0044249	cellular biosynthetic process	0.35955	null	null	3.795	-33.9196	0.83	0.618	44271	1
GO:0034613	cellular protein localization	0.09579	null	null	3.22	-33.4881	0.817	0.823	72594	1
GO:0010629	negative regulation of gene expression	0.08477	-6.972	2.006	3.167	-33.4604	0.814	0.342	10629	0
GO:0070727	cellular macromolecule localization	0.09654	null	null	3.224	-33.2248	0.84	0.579	72594	1
GO:0009057	macromolecule catabolic process	0.06878	null	null	3.077	-32.1	0.869	0.651	34655	1
GO:0090304	nucleic acid metabolic process	0.29879	null	null	3.714	-30.8409	0.775	0.605	34641	1
GO:0006612	protein targeting to membrane	0.01091	null	null	2.279	-29.981	0.793	0.818	72594	1
GO:0006807	nitrogen compound metabolic process	0.40081	-3.485	-7.42	3.842	-29.7809	0.914	0.159	6807	0
GO:0044237	cellular metabolic process	0.59486	-4.411	-6.912	4.013	-29.0889	0.9	0.212	44237	0
GO:0090150	establishment of protein localization to membrane	0.02164	null	null	2.575	-28.8231	0.786	0.754	72594	1
GO:0044248	cellular catabolic process	0.09221	null	null	3.204	-28.749	0.869	0.758	34655	1
GO:0046907	intracellular transport	0.10023	null	null	3.24	-28.6981	0.843	0.698	72594	1
GO:0044238	primary metabolic process	0.60306	-4.47	-6.882	4.019	-28.4937	0.902	0.297	44238	0
GO:0010605	negative regulation of macromolecule metabolic process	0.1341	null	null	3.366	-28.0143	0.816	0.734	10629	1
GO:0006605	protein targeting	0.0401	null	null	2.843	-27.4745	0.823	0.655	72594	1
GO:0051704	multi-organism process	0.09873	-0.776	-1.137	3.234	-27.4411	0.995	0	51704	0
GO:1901575	organic substance catabolic process	0.10848	null	null	3.274	-27.4366	0.875	0.833	34655	1
GO:0009892	negative regulation of metabolic process	0.14605	-5.704	0.766	3.403	-27.1061	0.846	0.438	9892	0
GO:0071704	organic substance metabolic process	0.62701	-4.6	-6.445	4.036	-27.0901	0.9	0.313	71704	0
GO:0045184	establishment of protein localization	0.11829	null	null	3.312	-26.0588	0.841	0.762	72594	1
GO:0008152	metabolic process	0.64841	-2.018	0.457	4.051	-26.0231	0.998	0	8152	0
GO:0010608	posttranscriptional regulation of gene expression	0.02758	-6.09	2.789	2.68	-25.9012	0.865	0.239	10608	0
GO:0010467	gene expression	0.30542	-6.338	-3.899	3.724	-25.7117	0.891	0.158	10467	0
GO:0009056	catabolic process	0.11471	-0.878	-4.323	3.299	-24.9502	0.935	0.056	9056	0
GO:0051641	cellular localization	0.14905	4.871	-2.992	3.412	-24.702	0.912	0.253	51641	0
GO:0015833	peptide transport	0.01529	4.969	-3.368	2.425	-24.5448	0.912	0.227	15833	0
GO:0015031	protein transport	0.10889	null	null	3.276	-24.1228	0.835	0.752	72594	1
GO:1901564	organonitrogen compound metabolic process	0.13324	-6.62	3.243	3.364	-24.1145	0.855	0.365	1901564	0
GO:0042886	amide transport	0.01673	null	null	2.464	-23.8832	0.92	0.718	15833	1
GO:0009059	macromolecule biosynthetic process	0.30127	null	null	3.718	-23.4364	0.83	0.569	44271	1
GO:0034645	cellular macromolecule biosynthetic process	0.29209	null	null	3.704	-23.369	0.809	0.561	44271	1
GO:0016070	RNA metabolic process	0.26924	null	null	3.669	-23.1323	0.769	0.578	34641	1
GO:0051649	establishment of localization in cell	0.11864	null	null	3.313	-22.3491	0.846	0.731	72594	1
GO:0008104	protein localization	0.14414	null	null	3.398	-22.3047	0.853	0.7	72594	1
GO:0071705	nitrogen compound transport	0.04472	5.93	-3.495	2.89	-22.1073	0.913	0.265	71705	0
GO:0044267	cellular protein metabolic process	0.28505	-7.402	-2.875	3.694	-21.9354	0.863	0.34	44267	0
GO:0019222	regulation of metabolic process	0.3573	-2.744	-6.691	3.792	-20.8004	0.894	0.148	19222	0
GO:0033036	macromolecule localization	0.16624	5.609	-3.317	3.46	-20.6676	0.91	0.353	33036	0
GO:0060255	regulation of macromolecule metabolic process	0.3363	-6.845	-1.882	3.766	-20.4795	0.811	0.439	60255	0
GO:0022613	ribonucleoprotein complex biogenesis	0.02597	5.019	5.566	2.654	-20.2576	0.947	0	22613	0
GO:0043170	macromolecule metabolic process	0.53306	-4.929	-6.438	3.966	-20.196	0.897	0.265	43170	0
GO:0051234	establishment of localization	0.2996	null	null	3.715	-19.7888	0.901	0.536	6810	1
GO:0006810	transport	0.29215	6.287	-3.78	3.704	-19.3367	0.886	0.432	6810	0
GO:0010468	regulation of gene expression	0.25084	null	null	3.638	-19.0076	0.804	0.535	60255	1
GO:0044260	cellular macromolecule metabolic process	0.48748	-6.747	-4.242	3.927	-18.727	0.864	0.308	44260	0
GO:0072657	protein localization to membrane	0.02954	null	null	2.71	-18.5658	0.784	0.625	72594	1
GO:0071702	organic substance transport	0.15586	null	null	3.432	-18.0506	0.896	0.547	6810	1
GO:0048519	negative regulation of biological process	0.26855	-1.803	-4.46	3.668	-18.0123	0.952	0	48519	0
GO:0071826	ribonucleoprotein complex subunit organization	0.01218	5.115	5.446	2.326	-17.8588	0.95	0.376	71826	0
GO:0022618	ribonucleoprotein complex assembly	0.01143	5.169	5.24	2.299	-17.7679	0.932	0.36	22618	0
GO:0019538	protein metabolic process	0.31991	-6.473	-3.99	3.744	-17.3773	0.887	0.316	19538	0
GO:0002181	cytoplasmic translation	0.00271	null	null	1.681	-16.8831	0.825	0.681	6412	1
GO:1903311	regulation of mRNA metabolic process	0.00773	-6.302	4.997	2.13	-16.3712	0.811	0.237	1903311	0
GO:0008380	RNA splicing	0.02418	-6.28	4.524	2.623	-15.647	0.821	0.276	8380	0
GO:0061013	regulation of mRNA catabolic process	0.00185	null	null	1.519	-15.4414	0.803	0.714	34655	1
GO:0044085	cellular component biogenesis	0.17149	4.437	5.478	3.473	-15.4246	0.946	0.236	44085	0
GO:0009987	cellular process	0.90329	-1.665	-0.333	4.195	-15.1305	0.999	0	9987	0
GO:0043488	regulation of mRNA stability	0.00814	-4.114	4.505	2.152	-14.9461	0.865	0.247	43488	0
GO:0006417	regulation of translation	0.02031	null	null	2.548	-14.923	0.74	0.872	6412	1
GO:0034504	protein localization to nucleus	0.02095	null	null	2.561	-14.8333	0.834	0.781	72594	1
GO:0006396	RNA processing	0.0528	-6.781	3.986	2.962	-14.5852	0.817	0.31	6396	0
GO:0043487	regulation of RNA stability	0.00866	null	null	2.179	-14.3185	0.865	0.73	43488	1
GO:0065003	macromolecular complex assembly	0.09977	4.532	5.527	3.238	-13.8847	0.93	0.498	65003	0
GO:0000375	RNA splicing, via transesterification reactions	0.01858	null	null	2.509	-13.575	0.824	0.91	8380	1
GO:0051179	localization	0.36018	0.284	0.138	3.795	-13.3139	0.996	0	51179	0
GO:0034248	regulation of cellular amide metabolic process	0.02204	null	null	2.583	-13.2088	0.8	0.771	6412	1
GO:0000377	RNA splicing, via transesterification reactions with bulged adenosine as nucleophile	0.01841	null	null	2.505	-12.8885	0.824	0.979	8380	1
GO:0000398	mRNA splicing, via spliceosome	0.01841	null	null	2.505	-12.8885	0.808	0.722	8380	1
GO:0006913	nucleocytoplasmic transport	0.02706	4.636	-2.895	2.672	-12.7235	0.855	0.472	6913	0
GO:0051169	nuclear transport	0.02752	null	null	2.679	-12.6012	0.864	0.575	6913	1
GO:0022607	cellular component assembly	0.15638	null	null	3.433	-12.2133	0.929	0.702	65003	1
GO:0043933	macromolecular complex subunit organization	0.14259	4.065	5.583	3.393	-12.1971	0.942	0.344	43933	0
GO:0071840	cellular component organization or biogenesis	0.36532	-1.36	-1.561	3.802	-12.1947	0.996	0	71840	0
GO:0006996	organelle organization	0.19411	4.08	5.283	3.527	-11.9559	0.939	0.376	6996	0
GO:0034622	cellular macromolecular complex assembly	0.05747	null	null	2.999	-11.7878	0.933	0.647	65003	1
GO:0051170	nuclear import	0.01708	null	null	2.473	-11.5518	0.862	0.91	6913	1
GO:0009260	ribonucleotide biosynthetic process	0.01518	null	null	2.422	-11.323	0.704	0.976	6412	1
GO:0009152	purine ribonucleotide biosynthetic process	0.01443	null	null	2.4	-11.0691	0.686	0.609	6412	1
GO:0006457	protein folding	0.01396	0.503	-0.263	2.386	-11.0245	0.991	0.003	6457	0
GO:0046390	ribose phosphate biosynthetic process	0.01535	null	null	2.427	-11.0211	0.797	0.786	6412	1
GO:0006164	purine nucleotide biosynthetic process	0.01471	null	null	2.408	-10.8945	0.686	0.971	6412	1
GO:0033554	cellular response to stress	0.10496	1.218	3.926	3.26	-10.8595	0.947	0.335	33554	0
GO:0072522	purine-containing compound biosynthetic process	0.01546	null	null	2.43	-10.4032	0.804	0.775	6412	1
GO:0006397	mRNA processing	0.02781	null	null	2.684	-10.1912	0.802	0.82	8380	1
GO:0042254	ribosome biogenesis	0.01835	null	null	2.504	-10.0538	0.937	0.84	22618	1
GO:0009165	nucleotide biosynthetic process	0.01898	null	null	2.519	-9.9896	0.697	0.946	6412	1
GO:0032204	regulation of telomere maintenance	0.00421	-2.827	6.33	1.869	-9.9718	0.75	0.248	32204	0
GO:0009894	regulation of catabolic process	0.03006	null	null	2.718	-9.8899	0.848	0.539	34655	1
GO:0080090	regulation of primary metabolic process	0.33566	null	null	3.765	-9.8748	0.821	0.606	60255	1
GO:1901293	nucleoside phosphate biosynthetic process	0.01916	null	null	2.522	-9.8536	0.706	0.773	6412	1
GO:0019219	regulation of nucleobase-containing compound metabolic process	0.23912	null	null	3.618	-9.7694	0.726	0.551	34641	1
GO:0043312	neutrophil degranulation	0.02799	5.25	-2.015	2.687	-9.7115	0.814	0.247	43312	0
GO:0031323	regulation of cellular metabolic process	0.33837	null	null	3.768	-9.6444	0.811	0.609	60255	1
GO:0002283	neutrophil activation involved in immune response	0.02799	null	null	2.687	-9.6241	0.896	0.969	43312	1
GO:0009142	nucleoside triphosphate biosynthetic process	0.0045	null	null	1.898	-9.5508	0.737	0.805	6412	1
GO:0016043	cellular component organization	0.35684	4.767	6.031	3.791	-9.4593	0.935	0.479	16043	0
GO:0009124	nucleoside monophosphate biosynthetic process	0.00531	null	null	1.968	-9.3997	0.733	0.819	6412	1
GO:0042119	neutrophil activation	0.02827	null	null	2.691	-9.3376	0.918	0.968	43312	1
GO:0002446	neutrophil mediated immunity	0.02879	null	null	2.699	-9.3094	0.941	0.942	43312	1
GO:0009201	ribonucleoside triphosphate biosynthetic process	0.00387	null	null	1.833	-9.2438	0.737	0.96	6412	1
GO:0051171	regulation of nitrogen compound metabolic process	0.2547	null	null	3.645	-9.2216	0.776	0.538	60255	1
GO:0036230	granulocyte activation	0.02851	null	null	2.695	-9.1416	0.919	0.904	43312	1
GO:0009156	ribonucleoside monophosphate biosynthetic process	0.00485	null	null	1.929	-9.0782	0.732	0.964	6412	1
GO:0000723	telomere maintenance	0.00791	null	null	2.14	-8.9467	0.765	0.927	32204	1
GO:0010033	response to organic substance	0.16515	3.744	1.833	3.457	-8.9444	0.954	0.436	10033	0
GO:0009168	purine ribonucleoside monophosphate biosynthetic process	0.00415	null	null	1.863	-8.9183	0.736	0.798	6412	1
GO:1903047	mitotic cell cycle process	0.05286	null	null	2.962	-8.8843	0.933	0.834	44772	1
GO:0031329	regulation of cellular catabolic process	0.02256	null	null	2.593	-8.8617	0.837	0.577	34655	1
GO:0009127	purine nucleoside monophosphate biosynthetic process	0.00415	null	null	1.863	-8.8127	0.736	0.95	6412	1
GO:0008219	cell death	0.11881	-0.234	-0.067	3.314	-8.776	0.965	0.062	8219	0
GO:0032200	telomere organization	0.00808	null	null	2.149	-8.7658	0.916	0.625	32204	1
GO:0051276	chromosome organization	0.03566	4.169	5.952	2.792	-8.7362	0.936	0.3	51276	0
GO:0034660	ncRNA metabolic process	0.03226	-6.037	4.032	2.748	-8.7339	0.836	0.288	34660	0
GO:0009889	regulation of biosynthetic process	0.25216	null	null	3.641	-8.7212	0.794	0.536	60255	1
GO:0009206	purine ribonucleoside triphosphate biosynthetic process	0.00352	null	null	1.792	-8.6632	0.739	0.785	6412	1
GO:0009145	purine nucleoside triphosphate biosynthetic process	0.00358	null	null	1.799	-8.6085	0.739	0.962	6412	1
GO:0032206	positive regulation of telomere maintenance	0.00277	null	null	1.69	-8.6085	0.748	0.846	32204	1
GO:0002444	myeloid leukocyte mediated immunity	0.03133	null	null	2.736	-8.5881	0.941	0.818	43312	1
GO:0017038	protein import	0.01875	null	null	2.513	-8.5837	0.859	0.52	72594	1
GO:0043299	leukocyte degranulation	0.03064	null	null	2.726	-8.3929	0.839	0.853	43312	1
GO:0031326	regulation of cellular biosynthetic process	0.24939	null	null	3.636	-8.3498	0.767	0.534	60255	1
GO:0002275	myeloid cell activation involved in immune response	0.03093	null	null	2.73	-8.1132	0.895	0.917	43312	1
GO:0042255	ribosome assembly	0.00335	null	null	1.771	-8.0834	0.927	0.856	22618	1
GO:0006606	protein import into nucleus	0.01587	null	null	2.441	-8.0061	0.799	0.901	6913	1
GO:1900182	positive regulation of protein localization to nucleus	0.00744	null	null	2.114	-7.9692	0.803	0.682	72594	1
GO:0034654	nucleobase-containing compound biosynthetic process	0.25378	null	null	3.643	-7.9319	0.75	0.564	34641	1
GO:0018130	heterocycle biosynthetic process	0.2577	null	null	3.65	-7.7386	0.783	0.568	34641	1
GO:0010556	regulation of macromolecule biosynthetic process	0.23855	null	null	3.616	-7.5603	0.766	0.73	60255	1
GO:0012501	programmed cell death	0.11246	null	null	3.29	-7.467	0.93	0.673	2001233	1
GO:1901362	organic cyclic compound biosynthetic process	0.26549	null	null	3.663	-7.4627	0.793	0.542	34641	1
GO:2000112	regulation of cellular macromolecule biosynthetic process	0.2322	null	null	3.605	-7.4137	0.754	0.723	60255	1
GO:0019438	aromatic compound biosynthetic process	0.25793	null	null	3.65	-7.3336	0.784	0.563	34641	1
GO:0045055	regulated exocytosis	0.04299	null	null	2.873	-7.3119	0.878	0.859	43312	1
GO:0006259	DNA metabolic process	0.05661	-6.891	3.862	2.992	-7.1066	0.826	0.284	6259	0
GO:0000278	mitotic cell cycle	0.05822	null	null	3.004	-7.0582	0.937	0.655	44772	1
GO:0019752	carboxylic acid metabolic process	0.05557	null	null	2.984	-6.9377	0.804	0.776	6520	1
GO:0010941	regulation of cell death	0.088	null	null	3.184	-6.8832	0.901	0.813	2001233	1
GO:1904871	positive regulation of protein localization to Cajal body	0.00046	null	null	0.954	-6.8382	0.838	0.685	72594	1
GO:1904869	regulation of protein localization to Cajal body	0.00046	null	null	0.954	-6.8382	0.848	0.984	72594	1
GO:0051246	regulation of protein metabolic process	0.14651	-7.412	-0.156	3.405	-6.8084	0.83	0.488	51246	0
GO:0070887	cellular response to chemical stimulus	0.15701	null	null	3.435	-6.6464	0.948	0.594	10033	1
GO:0006520	cellular amino acid metabolic process	0.02152	-4.747	4.284	2.573	-6.621	0.776	0.49	6520	0
GO:0006950	response to stress	0.2131	2.433	1.174	3.567	-6.6116	0.968	0.152	6950	0
GO:0031324	negative regulation of cellular metabolic process	0.13589	null	null	3.372	-6.5497	0.816	0.82	10629	1
GO:0071103	DNA conformation change	0.01477	null	null	2.41	-6.5365	0.911	0.712	32204	1
GO:1901990	regulation of mitotic cell cycle phase transition	0.0187	null	null	2.512	-6.5284	0.914	0.89	44772	1
GO:1904358	positive regulation of telomere maintenance via telomere lengthening	0.00202	null	null	1.556	-6.4543	0.754	0.918	32204	1
GO:0051052	regulation of DNA metabolic process	0.02193	null	null	2.581	-6.4256	0.78	0.583	32204	1
GO:0046822	regulation of nucleocytoplasmic transport	0.01223	null	null	2.328	-6.387	0.829	0.872	6913	1
GO:0071345	cellular response to cytokine stimulus	0.04172	2.575	2.764	2.86	-6.358	0.947	0.003	71345	0
GO:0006887	exocytosis	0.04986	null	null	2.937	-6.3266	0.877	0.702	43312	1
GO:1904867	protein localization to Cajal body	0.00052	null	null	1	-6.323	0.868	0.992	72594	1
GO:1903405	protein localization to nuclear body	0.00052	null	null	1	-6.323	0.868	0.999	72594	1
GO:1904851	positive regulation of establishment of protein localization to telomere	0.00052	null	null	1	-6.323	0.828	0.514	72594	1
GO:0002274	myeloid leukocyte activation	0.03531	null	null	2.787	-6.3147	0.922	0.714	43312	1
GO:0002366	leukocyte activation involved in immune response	0.03895	null	null	2.83	-6.2981	0.895	0.927	43312	1
GO:0050821	protein stabilization	0.00866	-1.553	4.16	2.179	-6.2825	0.958	0.267	50821	0
GO:0065008	regulation of biological quality	0.20202	0.199	-1.65	3.544	-6.2295	0.963	0.09	65008	0
GO:0002263	cell activation involved in immune response	0.03907	null	null	2.831	-6.2215	0.899	0.73	43312	1
GO:0006403	RNA localization	0.01258	4.631	-3.007	2.34	-6.2201	0.892	0.392	6403	0
GO:0019058	viral life cycle	0.02366	null	null	2.614	-6.2197	0.955	0.881	16032	1
GO:0071897	DNA biosynthetic process	0.01241	null	null	2.334	-6.1919	0.807	0.66	32204	1
GO:1904356	regulation of telomere maintenance via telomere lengthening	0.00323	null	null	1.756	-6.1537	0.754	0.937	32204	1
GO:0007049	cell cycle	0.1	-0.49	0.385	3.239	-6.1042	0.966	0.079	7049	0
GO:0017148	negative regulation of translation	0.00906	null	null	2.199	-6.0972	0.747	0.784	6412	1
GO:0051172	negative regulation of nitrogen compound metabolic process	0.08632	null	null	3.175	-6.0116	0.784	0.737	10629	1
GO:0044772	mitotic cell cycle phase transition	0.03064	-1.921	0.599	2.726	-5.9928	0.935	0.003	44772	0
GO:0002218	activation of innate immune response	0.01662	2.122	3.479	2.461	-5.961	0.881	0.49	2218	0
GO:0043067	regulation of programmed cell death	0.08234	null	null	3.155	-5.9002	0.899	0.886	2001233	1
GO:0070203	regulation of establishment of protein localization to telomere	0.00058	null	null	1.041	-5.8914	0.837	0.98	72594	1
GO:1903827	regulation of cellular protein localization	0.03324	null	null	2.761	-5.8768	0.804	0.692	72594	1
GO:0006915	apoptotic process	0.10537	null	null	3.262	-5.8583	0.93	0.846	2001233	1
GO:0009141	nucleoside triphosphate metabolic process	0.01731	null	null	2.479	-5.8415	0.73	0.745	6412	1
GO:0009199	ribonucleoside triphosphate metabolic process	0.0161	null	null	2.447	-5.7758	0.726	0.963	6412	1
GO:0051130	positive regulation of cellular component organization	0.06861	4.135	4.742	3.076	-5.7399	0.884	0.429	51130	0
GO:0032268	regulation of cellular protein metabolic process	0.13728	-7.95	-0.014	3.377	-5.7371	0.817	0.478	32268	0
GO:0042981	regulation of apoptotic process	0.08159	null	null	3.151	-5.7103	0.898	0.8	2001233	1
GO:1900180	regulation of protein localization to nucleus	0.01269	null	null	2.344	-5.6833	0.806	0.817	72594	1
GO:0032210	regulation of telomere maintenance via telomerase	0.00283	null	null	1.699	-5.6825	0.738	0.947	32204	1
GO:2001242	regulation of intrinsic apoptotic signaling pathway	0.00866	null	null	2.179	-5.6629	0.901	0.764	2001233	1
GO:0048522	positive regulation of cellular process	0.27732	2.256	-2.346	3.682	-5.658	0.916	0.128	48522	0
GO:0071310	cellular response to organic substance	0.12977	null	null	3.352	-5.6563	0.943	0.598	71345	1
GO:0044770	cell cycle phase transition	0.03231	null	null	2.749	-5.6534	0.939	0.684	44772	1
GO:2001233	regulation of apoptotic signaling pathway	0.0217	1.506	3.448	2.576	-5.6493	0.89	0.154	2001233	0
GO:0045089	positive regulation of innate immune response	0.0191	null	null	2.521	-5.6492	0.879	0.917	2218	1
GO:0043436	oxoacid metabolic process	0.06186	null	null	3.031	-5.6164	0.801	0.914	6520	1
GO:1901987	regulation of cell cycle phase transition	0.01991	null	null	2.539	-5.6076	0.914	0.897	44772	1
GO:0010833	telomere maintenance via telomere lengthening	0.00427	null	null	1.875	-5.5688	0.779	0.928	32204	1
GO:0034097	response to cytokine	0.04714	3.075	1.65	2.913	-5.5615	0.957	0.483	34097	0
GO:0032212	positive regulation of telomere maintenance via telomerase	0.0019	null	null	1.531	-5.5498	0.738	0.942	32204	1
GO:0070202	regulation of establishment of protein localization to chromosome	0.00063	null	null	1.079	-5.5188	0.838	0.887	72594	1
GO:1904816	positive regulation of protein localization to chromosome, telomeric region	0.00069	null	null	1.114	-5.5188	0.83	0.959	72594	1
GO:1990173	protein localization to nucleoplasm	0.00052	null	null	1	-5.5188	0.876	0.514	72594	1
GO:0097193	intrinsic apoptotic signaling pathway	0.01633	null	null	2.453	-5.5101	0.901	0.826	2001233	1
GO:0033043	regulation of organelle organization	0.06082	null	null	3.023	-5.506	0.894	0.637	51130	1
GO:2000573	positive regulation of DNA biosynthetic process	0.00364	null	null	1.806	-5.4479	0.777	0.674	32204	1
GO:0006278	RNA-dependent DNA biosynthetic process	0.00439	null	null	1.886	-5.4233	0.82	0.785	32204	1
GO:0051252	regulation of RNA metabolic process	0.21864	null	null	3.579	-5.4173	0.715	0.691	34641	1
GO:0031647	regulation of protein stability	0.01408	-1.15	3.25	2.389	-5.4156	0.956	0.283	31647	0
GO:0010638	positive regulation of organelle organization	0.0311	null	null	2.732	-5.3882	0.879	0.588	32204	1
GO:0007004	telomere maintenance via telomerase	0.00364	null	null	1.806	-5.3667	0.757	0.957	32204	1
GO:0006082	organic acid metabolic process	0.06284	null	null	3.037	-5.3584	0.805	0.629	6520	1
GO:0090407	organophosphate biosynthetic process	0.03728	null	null	2.811	-5.3394	0.788	0.663	6412	1
GO:0009205	purine ribonucleoside triphosphate metabolic process	0.01575	null	null	2.438	-5.2858	0.726	0.834	6412	1
GO:0032392	DNA geometric change	0.00496	null	null	1.94	-5.2153	0.919	0.774	32204	1
GO:0034249	negative regulation of cellular amide metabolic process	0.00958	null	null	2.223	-5.1011	0.8	0.873	6412	1
GO:0009144	purine nucleoside triphosphate metabolic process	0.01616	null	null	2.449	-5.0924	0.725	0.966	6412	1
GO:0022402	cell cycle process	0.07703	null	null	3.126	-5.0838	0.935	0.767	44772	1
GO:0009117	nucleotide metabolic process	0.03958	null	null	2.837	-5.0723	0.701	0.861	6412	1
GO:0019693	ribose phosphate metabolic process	0.03272	null	null	2.754	-4.962	0.823	0.744	6412	1
GO:0050789	regulation of biological process	0.63456	-1.413	-3.893	4.041	-4.9538	0.953	0.177	50789	0
GO:0006753	nucleoside phosphate metabolic process	0.03993	null	null	2.841	-4.9506	0.704	0.934	6412	1
GO:0060249	anatomical structure homeostasis	0.02083	-1.257	3.542	2.559	-4.9287	0.945	0.459	60249	0
GO:0048518	positive regulation of biological process	0.30969	-2.268	-4.174	3.73	-4.9153	0.951	0.151	48518	0
GO:1903829	positive regulation of cellular protein localization	0.02193	null	null	2.581	-4.911	0.796	0.796	72594	1
GO:1904814	regulation of protein localization to chromosome, telomeric region	0.00081	null	null	1.176	-4.8973	0.838	0.874	72594	1
GO:0051054	positive regulation of DNA metabolic process	0.01212	null	null	2.324	-4.8851	0.774	0.756	32204	1
GO:0006754	ATP biosynthetic process	0.00283	null	null	1.699	-4.877	0.72	0.975	6412	1
GO:0042273	ribosomal large subunit biogenesis	0.00352	null	null	1.792	-4.8348	0.946	0.703	22618	1
GO:0009123	nucleoside monophosphate metabolic process	0.01829	null	null	2.502	-4.8341	0.728	0.777	6412	1
GO:0007346	regulation of mitotic cell cycle	0.02989	null	null	2.715	-4.8161	0.911	0.766	44772	1
GO:0009259	ribonucleotide metabolic process	0.03191	null	null	2.744	-4.8157	0.707	0.956	6412	1
GO:0051128	regulation of cellular component organization	0.13335	3.995	4.894	3.364	-4.8132	0.908	0.338	51128	0
GO:0000027	ribosomal large subunit assembly	0.00138	null	null	1.398	-4.7864	0.937	0.788	22618	1
GO:0032508	DNA duplex unwinding	0.00439	null	null	1.886	-4.7475	0.92	0.627	32204	1
GO:0009161	ribonucleoside monophosphate metabolic process	0.01754	null	null	2.484	-4.747	0.723	0.967	6412	1
GO:0042221	response to chemical	0.23993	3.425	1.596	3.619	-4.7069	0.968	0.241	42221	0
GO:0044283	small molecule biosynthetic process	0.03064	null	null	2.726	-4.7005	0.8	0.508	6520	1
GO:2000278	regulation of DNA biosynthetic process	0.00583	null	null	2.009	-4.6919	0.781	0.82	32204	1
GO:0043484	regulation of RNA splicing	0.00623	null	null	2.037	-4.6778	0.812	0.801	8380	1
GO:2001252	positive regulation of chromosome organization	0.00381	null	null	1.826	-4.6775	0.878	0.863	32204	1
GO:0097190	apoptotic signaling pathway	0.03358	null	null	2.766	-4.635	0.897	0.557	2001233	1
GO:1904874	positive regulation of telomerase RNA localization to Cajal body	0.00087	4.565	-1.669	1.204	-4.632	0.872	0.29	1904874	0
GO:0044281	small molecule metabolic process	0.12072	-0.874	-1.696	3.321	-4.6162	0.862	0.071	44281	0
GO:0048523	negative regulation of cellular process	0.24951	null	null	3.636	-4.6108	0.916	0.581	9892	1
GO:0009150	purine ribonucleotide metabolic process	0.03104	null	null	2.732	-4.5709	0.689	0.923	6412	1
GO:0046824	positive regulation of nucleocytoplasmic transport	0.00681	null	null	2.076	-4.5435	0.828	0.813	6913	1
GO:0045088	regulation of innate immune response	0.02279	null	null	2.598	-4.5372	0.894	0.787	2218	1
GO:0055086	nucleobase-containing small molecule metabolic process	0.04293	null	null	2.872	-4.5262	0.761	0.561	6520	1
GO:0010564	regulation of cell cycle process	0.03393	null	null	2.77	-4.4972	0.91	0.776	44772	1
GO:0009167	purine ribonucleoside monophosphate metabolic process	0.01685	null	null	2.467	-4.4817	0.724	0.843	6412	1
GO:0009628	response to abiotic stimulus	0.06705	3.052	0.022	3.066	-4.4492	0.973	0.169	9628	0
GO:0006163	purine nucleotide metabolic process	0.03208	null	null	2.746	-4.429	0.689	0.943	6412	1
GO:0009126	purine nucleoside monophosphate metabolic process	0.01691	null	null	2.468	-4.4042	0.724	0.967	6412	1
GO:0070200	establishment of protein localization to telomere	0.00087	null	null	1.204	-4.3898	0.855	0.918	72594	1
GO:0001732	formation of cytoplasmic translation initiation complex	0.00012	null	null	0.477	-4.3898	0.831	0.737	6412	1
GO:0043618	regulation of transcription from RNA polymerase II promoter in response to stress	0.00664	-5.281	5.638	2.064	-4.3191	0.782	0.241	43618	0
GO:0002252	immune effector process	0.06896	1.772	-0.637	3.078	-4.3025	0.95	0.482	2252	0
GO:0002183	cytoplasmic translational initiation	0.00098	null	null	1.255	-4.2535	0.839	0.614	6412	1
GO:0072521	purine-containing compound metabolic process	0.03422	null	null	2.774	-4.2495	0.825	0.524	6412	1
GO:0044766	multi-organism transport	0.00404	6.09	-3.701	1.851	-4.246	0.906	0.479	44766	0
GO:1902579	multi-organism localization	0.00404	4.072	-3.112	1.851	-4.246	0.922	0.479	1902579	0
GO:0033044	regulation of chromosome organization	0.00819	null	null	2.155	-4.1523	0.891	0.713	32204	1
GO:0035722	interleukin-12-mediated signaling pathway	0.00017	2.116	1.555	0.602	-4.152	0.944	0.492	35722	0
GO:0009893	positive regulation of metabolic process	0.17715	null	null	3.487	-4.1179	0.833	0.537	48522	1
GO:0006796	phosphate-containing compound metabolic process	0.18188	-3.32	-5.8	3.499	-4.0359	0.839	0.152	6796	0
GO:0006986	response to unfolded protein	0.00975	1.122	3.504	2.23	-4.0244	0.953	0.385	6986	0
GO:0043620	regulation of DNA-templated transcription in response to stress	0.00692	-5.35	5.663	2.083	-4.0208	0.784	0.404	43620	0
GO:0071349	cellular response to interleukin-12	0.00017	null	null	0.602	-3.9624	0.963	0.941	35722	1
GO:1904872	regulation of telomerase RNA localization to Cajal body	0.00087	null	null	1.204	-3.9608	0.881	0.99	1904874	1
GO:0070671	response to interleukin-12	0.00029	null	null	0.778	-3.8711	0.969	0.514	71345	1
GO:0034404	nucleobase-containing small molecule biosynthetic process	0.01757	null	null	2.484	-3.8586	0.719	0.728	6412	1
GO:0006793	phosphorus metabolic process	0.18702	-3.383	-5.843	3.511	-3.8442	0.91	0.154	6793	0
GO:0061418	regulation of transcription from RNA polymerase II promoter in response to hypoxia	0.00456	null	null	1.903	-3.8359	0.775	0.949	43618	1
GO:0051168	nuclear export	0.01143	null	null	2.299	-3.8043	0.868	0.865	6913	1
GO:0007339	binding of sperm to zona pellucida	0.00196	2.916	-3.166	1.544	-3.7924	0.955	0.443	7339	0
GO:0060548	negative regulation of cell death	0.05222	null	null	2.957	-3.7886	0.884	0.812	2001233	1
GO:0090685	RNA localization to nucleus	0.00274	null	null	1.681	-3.7688	0.895	0.67	1904874	1
GO:0090671	telomerase RNA localization to Cajal body	0.00092	null	null	1.23	-3.7688	0.9	0.994	1904874	1
GO:0090672	telomerase RNA localization	0.00092	null	null	1.23	-3.7688	0.904	0.67	1904874	1
GO:0090670	RNA localization to Cajal body	0.00092	null	null	1.23	-3.7688	0.904	0.615	1904874	1
GO:0051726	regulation of cell cycle	0.0584	null	null	3.006	-3.7085	0.908	0.767	44772	1
GO:2000113	negative regulation of cellular macromolecule biosynthetic process	0.07576	null	null	3.119	-3.6909	0.777	0.689	10629	1
GO:0080134	regulation of response to stress	0.07657	null	null	3.123	-3.6293	0.923	0.504	33554	1
GO:0070198	protein localization to chromosome, telomeric region	0.00162	null	null	1.462	-3.608	0.856	0.783	72594	1
GO:0010604	positive regulation of macromolecule metabolic process	0.16613	null	null	3.459	-3.6078	0.813	0.526	48522	1
GO:0016072	rRNA metabolic process	0.01518	-6.351	5.538	2.422	-3.6018	0.843	0.258	16072	0
GO:0046364	monosaccharide biosynthetic process	0.00514	null	null	1.954	-3.5905	0.828	0.514	6520	1
GO:0006732	coenzyme metabolic process	0.0187	-1.927	-0.428	2.512	-3.564	0.925	0.058	6732	0
GO:0065007	biological regulation	0.67069	-1.247	-0.241	4.065	-3.5468	0.998	0	65007	0
GO:2001235	positive regulation of apoptotic signaling pathway	0.01039	null	null	2.258	-3.5291	0.881	0.804	2001233	1
GO:0006165	nucleoside diphosphate phosphorylation	0.00502	null	null	1.944	-3.5182	0.763	0.651	6412	1
GO:0002443	leukocyte mediated immunity	0.04859	null	null	2.926	-3.4955	0.939	0.795	43312	1
GO:1904951	positive regulation of establishment of protein localization	0.03006	null	null	2.718	-3.4917	0.809	0.788	72594	1
GO:0006090	pyruvate metabolic process	0.00606	null	null	2.025	-3.4877	0.85	0.61	6520	1
GO:0046939	nucleotide phosphorylation	0.00537	null	null	1.973	-3.4324	0.762	0.655	6412	1
GO:1903312	negative regulation of mRNA metabolic process	0.00225	null	null	1.602	-3.4038	0.817	0.779	34655	1
GO:0009890	negative regulation of biosynthetic process	0.08546	null	null	3.171	-3.3365	0.802	0.735	10629	1
GO:0009132	nucleoside diphosphate metabolic process	0.00652	null	null	2.057	-3.3325	0.757	0.667	6412	1
GO:0035966	response to topologically incorrect protein	0.01079	1.35	5.012	2.274	-3.2576	0.952	0.39	35966	0
GO:0010558	negative regulation of macromolecule biosynthetic process	0.08003	null	null	3.142	-3.2183	0.786	0.881	10629	1
GO:0075733	intracellular transport of virus	0.00381	null	null	1.826	-3.2136	0.854	0.991	44766	1
GO:0006094	gluconeogenesis	0.00462	null	null	1.908	-3.1761	0.829	0.832	6520	1
GO:0036294	cellular response to decreased oxygen levels	0.01114	null	null	2.288	-3.0984	0.951	0.9	36293	1
GO:0006418	tRNA aminoacylation for protein translation	0.00283	null	null	1.699	-3.0251	0.752	0.684	6412	1
GO:0006511	ubiquitin-dependent protein catabolic process	0.03306	null	null	2.759	-3.015	0.853	0.611	34655	1
GO:0019319	hexose biosynthetic process	0.00479	null	null	1.924	-3.0135	0.829	0.978	6520	1
GO:0046794	transport of virus	0.00398	null	null	1.845	-2.9952	0.898	0.995	44766	1
GO:0050896	response to stimulus	0.49302	-1.169	-1.395	3.932	-2.9374	0.997	0	50896	0
GO:0031327	negative regulation of cellular biosynthetic process	0.08419	null	null	3.164	-2.925	0.787	0.9	10629	1
GO:0036293	response to decreased oxygen levels	0.01991	1.241	0.162	2.539	-2.9228	0.967	0.101	36293	0
GO:0019941	modification-dependent protein catabolic process	0.03347	null	null	2.764	-2.9209	0.853	0.962	34655	1
GO:0034470	ncRNA processing	0.02268	null	null	2.595	-2.8873	0.814	0.833	16072	1
GO:0045934	negative regulation of nucleobase-containing compound metabolic process	0.07807	null	null	3.132	-2.8788	0.752	0.655	10629	1
GO:0045087	innate immune response	0.05124	null	null	2.949	-2.8774	0.917	0.623	2218	1
GO:0031349	positive regulation of defense response	0.02441	null	null	2.627	-2.8692	0.906	0.827	2218	1
GO:0046496	nicotinamide nucleotide metabolic process	0.00796	null	null	2.143	-2.8449	0.728	0.84	6732	1
GO:0019362	pyridine nucleotide metabolic process	0.00796	null	null	2.143	-2.8449	0.728	0.983	6732	1
GO:0070199	establishment of protein localization to chromosome	0.00133	null	null	1.38	-2.8352	0.854	0.839	72594	1
GO:0009108	coenzyme biosynthetic process	0.009	null	null	2.196	-2.8183	0.894	0.852	6732	1
GO:0006399	tRNA metabolic process	0.01016	null	null	2.248	-2.8131	0.85	0.757	16072	1

## Sheet: S4 Metascape GO analysis fig 1b
GroupID	Category	Term	Description	LogP	Log(q-value)	InTerm_InList	Genes	Symbols
1_Summary	Reactome Gene Sets	R-HSA-8953854	Metabolism of RNA	-64.9712	-60.6521	100/675	1478,1653,1655,1656,1660,1981,2058,2521,3028,3178,3181,3184,3185,3187,3190,3192,3315,3842,3921,4670,4691,5093,5094,5685,5690,5700,5705,5706,5707,5708,5718,5725,5901,5903,5976,6122,6124,6125,6128,6129,6130,6132,6133,6134,6135,6136,6137,6138,6139,6141,6142,6144,6152,6155,6158,6165,6169,6175,6176,6187,6188,6189,6191,6194,6201,6202,6203,6204,6207,6208,6210,6222,6223,6228,6231,6606,6632,7175,7314,7514…	CSTF2,DDX1,DDX5,DDX6,DHX9,EIF4G1,EPRS1,FUS,HSD17B10,HNRNPA1,HNRNPA2B1,HNRNPD,HNRNPF,HNRNPH1,HNRNPK,HNRNPU,HSPB1,TNPO1,RPSA,HNRNPM,NCL,PCBP1,PCBP2,PSMA4,PSMB2,PSMC1,PSMC5,PSMC6,PSMD1,PSMD2,PSMD12,PTBP1,RAN,RANBP2,UPF1,RPL3,RPL4,RPL5,RPL6,RPL7,RPL7A,RPL8,RPL9,RPL10,RPL11,RPL12,RPL13,RPL15,RPL17,RPL18,RPL18A,RPL21,RPL24,RPL27,RPL28,RPL35A,RPL38,RPLP0,RPLP1,RPS2,RPS3,RPS3A,RPS4X,RPS6,RPS7,RPS8,RPS9,R…
1_Member	Reactome Gene Sets	R-HSA-8953854	Metabolism of RNA	-64.9712	-60.6521	100/675	1478,1653,1655,1656,1660,1981,2058,2521,3028,3178,3181,3184,3185,3187,3190,3192,3315,3842,3921,4670,4691,5093,5094,5685,5690,5700,5705,5706,5707,5708,5718,5725,5901,5903,5976,6122,6124,6125,6128,6129,6130,6132,6133,6134,6135,6136,6137,6138,6139,6141,6142,6144,6152,6155,6158,6165,6169,6175,6176,6187,6188,6189,6191,6194,6201,6202,6203,6204,6207,6208,6210,6222,6223,6228,6231,6606,6632,7175,7314,7514…	CSTF2,DDX1,DDX5,DDX6,DHX9,EIF4G1,EPRS1,FUS,HSD17B10,HNRNPA1,HNRNPA2B1,HNRNPD,HNRNPF,HNRNPH1,HNRNPK,HNRNPU,HSPB1,TNPO1,RPSA,HNRNPM,NCL,PCBP1,PCBP2,PSMA4,PSMB2,PSMC1,PSMC5,PSMC6,PSMD1,PSMD2,PSMD12,PTBP1,RAN,RANBP2,UPF1,RPL3,RPL4,RPL5,RPL6,RPL7,RPL7A,RPL8,RPL9,RPL10,RPL11,RPL12,RPL13,RPL15,RPL17,RPL18,RPL18A,RPL21,RPL24,RPL27,RPL28,RPL35A,RPL38,RPLP0,RPLP1,RPS2,RPS3,RPS3A,RPS4X,RPS6,RPS7,RPS8,RPS9,R…
1_Member	GO Biological Processes	GO:0034655	nucleobase-containing compound catabolic process	-63.4295	-59.4114	98/664	38,191,226,1153,1655,1656,1660,1981,2023,2033,2521,3184,3192,3251,3315,3836,3837,3842,3921,3939,4670,5223,5315,5317,5685,5690,5700,5705,5706,5707,5708,5718,5903,5976,6122,6124,6125,6128,6129,6130,6132,6133,6134,6135,6136,6137,6138,6139,6141,6142,6144,6152,6155,6158,6165,6169,6175,6176,6187,6188,6189,6191,6194,6201,6202,6203,6204,6207,6208,6210,6222,6223,6228,6231,6774,7167,7175,7314,7415,7431,751…	ACAT1,AHCY,ALDOA,CIRBP,DDX5,DDX6,DHX9,EIF4G1,ENO1,EP300,FUS,HNRNPD,HNRNPU,HPRT1,HSPB1,KPNA1,KPNB1,TNPO1,RPSA,LDHA,HNRNPM,PGAM1,PKM,PKP1,PSMA4,PSMB2,PSMC1,PSMC5,PSMC6,PSMD1,PSMD2,PSMD12,RANBP2,UPF1,RPL3,RPL4,RPL5,RPL6,RPL7,RPL7A,RPL8,RPL9,RPL10,RPL11,RPL12,RPL13,RPL15,RPL17,RPL18,RPL18A,RPL21,RPL24,RPL27,RPL28,RPL35A,RPL38,RPLP0,RPLP1,RPS2,RPS3,RPS3A,RPS4X,RPS6,RPS7,RPS8,RPS9,RPS10,RPS13,RPS14,RPS…
1_Member	GO Biological Processes	GO:0006402	mRNA catabolic process	-60.9509	-57.1089	77/370	1153,1655,1656,1660,1981,2521,3184,3192,3315,3842,3921,4670,5317,5685,5690,5700,5705,5706,5707,5708,5718,5976,6122,6124,6125,6128,6129,6130,6132,6133,6134,6135,6136,6137,6138,6139,6141,6142,6144,6152,6155,6158,6165,6169,6175,6176,6187,6188,6189,6191,6194,6201,6202,6203,6204,6207,6208,6210,6222,6223,6228,6231,7314,7431,7514,7534,8021,8570,10197,10492,23019,23521,26058,26986,54464,55802,56829	CIRBP,DDX5,DDX6,DHX9,EIF4G1,FUS,HNRNPD,HNRNPU,HSPB1,TNPO1,RPSA,HNRNPM,PKP1,PSMA4,PSMB2,PSMC1,PSMC5,PSMC6,PSMD1,PSMD2,PSMD12,UPF1,RPL3,RPL4,RPL5,RPL6,RPL7,RPL7A,RPL8,RPL9,RPL10,RPL11,RPL12,RPL13,RPL15,RPL17,RPL18,RPL18A,RPL21,RPL24,RPL27,RPL28,RPL35A,RPL38,RPLP0,RPLP1,RPS2,RPS3,RPS3A,RPS4X,RPS6,RPS7,RPS8,RPS9,RPS10,RPS13,RPS14,RPS15A,RPS18,RPS19,RPS23,RPS26,UBB,VIM,XPO1,YWHAZ,NUP214,KHSRP,PSME3,SY…
1_Member	GO Biological Processes	GO:0046700	heterocycle catabolic process	-60.2058	-56.5276	98/717	38,191,226,1153,1655,1656,1660,1981,2023,2033,2521,3184,3192,3251,3315,3836,3837,3842,3921,3939,4670,5223,5315,5317,5685,5690,5700,5705,5706,5707,5708,5718,5903,5976,6122,6124,6125,6128,6129,6130,6132,6133,6134,6135,6136,6137,6138,6139,6141,6142,6144,6152,6155,6158,6165,6169,6175,6176,6187,6188,6189,6191,6194,6201,6202,6203,6204,6207,6208,6210,6222,6223,6228,6231,6774,7167,7175,7314,7415,7431,751…	ACAT1,AHCY,ALDOA,CIRBP,DDX5,DDX6,DHX9,EIF4G1,ENO1,EP300,FUS,HNRNPD,HNRNPU,HPRT1,HSPB1,KPNA1,KPNB1,TNPO1,RPSA,LDHA,HNRNPM,PGAM1,PKM,PKP1,PSMA4,PSMB2,PSMC1,PSMC5,PSMC6,PSMD1,PSMD2,PSMD12,RANBP2,UPF1,RPL3,RPL4,RPL5,RPL6,RPL7,RPL7A,RPL8,RPL9,RPL10,RPL11,RPL12,RPL13,RPL15,RPL17,RPL18,RPL18A,RPL21,RPL24,RPL27,RPL28,RPL35A,RPL38,RPLP0,RPLP1,RPS2,RPS3,RPS3A,RPS4X,RPS6,RPS7,RPS8,RPS9,RPS10,RPS13,RPS14,RPS…
1_Member	GO Biological Processes	GO:0044270	cellular nitrogen compound catabolic process	-60.1477	-56.5276	98/718	38,191,226,1153,1655,1656,1660,1981,2023,2033,2521,3184,3192,3251,3315,3836,3837,3842,3921,3939,4670,5223,5315,5317,5685,5690,5700,5705,5706,5707,5708,5718,5903,5976,6122,6124,6125,6128,6129,6130,6132,6133,6134,6135,6136,6137,6138,6139,6141,6142,6144,6152,6155,6158,6165,6169,6175,6176,6187,6188,6189,6191,6194,6201,6202,6203,6204,6207,6208,6210,6222,6223,6228,6231,6774,7167,7175,7314,7415,7431,751…	ACAT1,AHCY,ALDOA,CIRBP,DDX5,DDX6,DHX9,EIF4G1,ENO1,EP300,FUS,HNRNPD,HNRNPU,HPRT1,HSPB1,KPNA1,KPNB1,TNPO1,RPSA,LDHA,HNRNPM,PGAM1,PKM,PKP1,PSMA4,PSMB2,PSMC1,PSMC5,PSMC6,PSMD1,PSMD2,PSMD12,RANBP2,UPF1,RPL3,RPL4,RPL5,RPL6,RPL7,RPL7A,RPL8,RPL9,RPL10,RPL11,RPL12,RPL13,RPL15,RPL17,RPL18,RPL18A,RPL21,RPL24,RPL27,RPL28,RPL35A,RPL38,RPLP0,RPLP1,RPS2,RPS3,RPS3A,RPS4X,RPS6,RPS7,RPS8,RPS9,RPS10,RPS13,RPS14,RPS…
1_Member	GO Biological Processes	GO:0006401	RNA catabolic process	-59.6539	-56.113	79/412	1153,1655,1656,1660,1981,2521,3184,3192,3315,3842,3921,4670,5317,5685,5690,5700,5705,5706,5707,5708,5718,5976,6122,6124,6125,6128,6129,6130,6132,6133,6134,6135,6136,6137,6138,6139,6141,6142,6144,6152,6155,6158,6165,6169,6175,6176,6187,6188,6189,6191,6194,6201,6202,6203,6204,6207,6208,6210,6222,6223,6228,6231,7314,7431,7514,7534,8021,8570,10128,10197,10492,23019,23521,26058,26986,54464,55596,55802…	CIRBP,DDX5,DDX6,DHX9,EIF4G1,FUS,HNRNPD,HNRNPU,HSPB1,TNPO1,RPSA,HNRNPM,PKP1,PSMA4,PSMB2,PSMC1,PSMC5,PSMC6,PSMD1,PSMD2,PSMD12,UPF1,RPL3,RPL4,RPL5,RPL6,RPL7,RPL7A,RPL8,RPL9,RPL10,RPL11,RPL12,RPL13,RPL15,RPL17,RPL18,RPL18A,RPL21,RPL24,RPL27,RPL28,RPL35A,RPL38,RPLP0,RPLP1,RPS2,RPS3,RPS3A,RPS4X,RPS6,RPS7,RPS8,RPS9,RPS10,RPS13,RPS14,RPS15A,RPS18,RPS19,RPS23,RPS26,UBB,VIM,XPO1,YWHAZ,NUP214,KHSRP,LRPPRC,P…
1_Member	GO Biological Processes	GO:0019439	aromatic compound catabolic process	-59.458	-55.984	98/730	38,191,226,1153,1655,1656,1660,1981,2023,2033,2521,3184,3192,3251,3315,3836,3837,3842,3921,3939,4670,5223,5315,5317,5685,5690,5700,5705,5706,5707,5708,5718,5903,5976,6122,6124,6125,6128,6129,6130,6132,6133,6134,6135,6136,6137,6138,6139,6141,6142,6144,6152,6155,6158,6165,6169,6175,6176,6187,6188,6189,6191,6194,6201,6202,6203,6204,6207,6208,6210,6222,6223,6228,6231,6774,7167,7175,7314,7415,7431,751…	ACAT1,AHCY,ALDOA,CIRBP,DDX5,DDX6,DHX9,EIF4G1,ENO1,EP300,FUS,HNRNPD,HNRNPU,HPRT1,HSPB1,KPNA1,KPNB1,TNPO1,RPSA,LDHA,HNRNPM,PGAM1,PKM,PKP1,PSMA4,PSMB2,PSMC1,PSMC5,PSMC6,PSMD1,PSMD2,PSMD12,RANBP2,UPF1,RPL3,RPL4,RPL5,RPL6,RPL7,RPL7A,RPL8,RPL9,RPL10,RPL11,RPL12,RPL13,RPL15,RPL17,RPL18,RPL18A,RPL21,RPL24,RPL27,RPL28,RPL35A,RPL38,RPLP0,RPLP1,RPS2,RPS3,RPS3A,RPS4X,RPS6,RPS7,RPS8,RPS9,RPS10,RPS13,RPS14,RPS…
1_Member	GO Biological Processes	GO:1901361	organic cyclic compound catabolic process	-57.3595	-53.9435	98/768	38,191,226,1153,1655,1656,1660,1981,2023,2033,2521,3184,3192,3251,3315,3836,3837,3842,3921,3939,4670,5223,5315,5317,5685,5690,5700,5705,5706,5707,5708,5718,5903,5976,6122,6124,6125,6128,6129,6130,6132,6133,6134,6135,6136,6137,6138,6139,6141,6142,6144,6152,6155,6158,6165,6169,6175,6176,6187,6188,6189,6191,6194,6201,6202,6203,6204,6207,6208,6210,6222,6223,6228,6231,6774,7167,7175,7314,7415,7431,751…	ACAT1,AHCY,ALDOA,CIRBP,DDX5,DDX6,DHX9,EIF4G1,ENO1,EP300,FUS,HNRNPD,HNRNPU,HPRT1,HSPB1,KPNA1,KPNB1,TNPO1,RPSA,LDHA,HNRNPM,PGAM1,PKM,PKP1,PSMA4,PSMB2,PSMC1,PSMC5,PSMC6,PSMD1,PSMD2,PSMD12,RANBP2,UPF1,RPL3,RPL4,RPL5,RPL6,RPL7,RPL7A,RPL8,RPL9,RPL10,RPL11,RPL12,RPL13,RPL15,RPL17,RPL18,RPL18A,RPL21,RPL24,RPL27,RPL28,RPL35A,RPL38,RPLP0,RPLP1,RPS2,RPS3,RPS3A,RPS4X,RPS6,RPS7,RPS8,RPS9,RPS10,RPS13,RPS14,RPS…
1_Member	Reactome Gene Sets	R-HSA-156827	L13a-mediated translational silencing of Ceruloplasmin expression	-56.78	-53.4152	49/111	1981,3921,6122,6124,6125,6128,6129,6130,6132,6133,6134,6135,6136,6137,6138,6139,6141,6142,6144,6152,6155,6158,6165,6169,6175,6176,6187,6188,6189,6191,6194,6201,6202,6203,6204,6207,6208,6210,6222,6223,6228,6231,8661,8663,8668,10480,23521,26986,51386	EIF4G1,RPSA,RPL3,RPL4,RPL5,RPL6,RPL7,RPL7A,RPL8,RPL9,RPL10,RPL11,RPL12,RPL13,RPL15,RPL17,RPL18,RPL18A,RPL21,RPL24,RPL27,RPL28,RPL35A,RPL38,RPLP0,RPLP1,RPS2,RPS3,RPS3A,RPS4X,RPS6,RPS7,RPS8,RPS9,RPS10,RPS13,RPS14,RPS15A,RPS18,RPS19,RPS23,RPS26,EIF3A,EIF3C,EIF3I,EIF3M,RPL13A,PABPC1,EIF3L
1_Member	Reactome Gene Sets	R-HSA-72613	Eukaryotic Translation Initiation	-56.5896	-53.3119	50/119	1981,1983,3921,6122,6124,6125,6128,6129,6130,6132,6133,6134,6135,6136,6137,6138,6139,6141,6142,6144,6152,6155,6158,6165,6169,6175,6176,6187,6188,6189,6191,6194,6201,6202,6203,6204,6207,6208,6210,6222,6223,6228,6231,8661,8663,8668,10480,23521,26986,51386	EIF4G1,EIF5,RPSA,RPL3,RPL4,RPL5,RPL6,RPL7,RPL7A,RPL8,RPL9,RPL10,RPL11,RPL12,RPL13,RPL15,RPL17,RPL18,RPL18A,RPL21,RPL24,RPL27,RPL28,RPL35A,RPL38,RPLP0,RPLP1,RPS2,RPS3,RPS3A,RPS4X,RPS6,RPS7,RPS8,RPS9,RPS10,RPS13,RPS14,RPS15A,RPS18,RPS19,RPS23,RPS26,EIF3A,EIF3C,EIF3I,EIF3M,RPL13A,PABPC1,EIF3L
1_Member	Reactome Gene Sets	R-HSA-72737	Cap-dependent Translation Initiation	-56.5896	-53.3119	50/119	1981,1983,3921,6122,6124,6125,6128,6129,6130,6132,6133,6134,6135,6136,6137,6138,6139,6141,6142,6144,6152,6155,6158,6165,6169,6175,6176,6187,6188,6189,6191,6194,6201,6202,6203,6204,6207,6208,6210,6222,6223,6228,6231,8661,8663,8668,10480,23521,26986,51386	EIF4G1,EIF5,RPSA,RPL3,RPL4,RPL5,RPL6,RPL7,RPL7A,RPL8,RPL9,RPL10,RPL11,RPL12,RPL13,RPL15,RPL17,RPL18,RPL18A,RPL21,RPL24,RPL27,RPL28,RPL35A,RPL38,RPLP0,RPLP1,RPS2,RPS3,RPS3A,RPS4X,RPS6,RPS7,RPS8,RPS9,RPS10,RPS13,RPS14,RPS15A,RPS18,RPS19,RPS23,RPS26,EIF3A,EIF3C,EIF3I,EIF3M,RPL13A,PABPC1,EIF3L
1_Member	Reactome Gene Sets	R-HSA-72706	GTP hydrolysis and joining of the 60S ribosomal subunit	-56.5365	-53.2965	49/112	1981,1983,3921,6122,6124,6125,6128,6129,6130,6132,6133,6134,6135,6136,6137,6138,6139,6141,6142,6144,6152,6155,6158,6165,6169,6175,6176,6187,6188,6189,6191,6194,6201,6202,6203,6204,6207,6208,6210,6222,6223,6228,6231,8661,8663,8668,10480,23521,51386	EIF4G1,EIF5,RPSA,RPL3,RPL4,RPL5,RPL6,RPL7,RPL7A,RPL8,RPL9,RPL10,RPL11,RPL12,RPL13,RPL15,RPL17,RPL18,RPL18A,RPL21,RPL24,RPL27,RPL28,RPL35A,RPL38,RPLP0,RPLP1,RPS2,RPS3,RPS3A,RPS4X,RPS6,RPS7,RPS8,RPS9,RPS10,RPS13,RPS14,RPS15A,RPS18,RPS19,RPS23,RPS26,EIF3A,EIF3C,EIF3I,EIF3M,RPL13A,EIF3L
1_Member	GO Biological Processes	GO:0072594	establishment of protein localization to organelle	-56.4039	-53.1988	85/548	293,908,1434,2316,2810,3301,3308,3309,3329,3728,3836,3837,3838,3839,3842,3843,3921,5514,5594,5901,5903,6122,6124,6125,6128,6129,6130,6132,6133,6134,6135,6136,6137,6138,6139,6141,6142,6144,6152,6155,6158,6165,6169,6175,6176,6187,6188,6189,6191,6194,6201,6202,6203,6204,6207,6208,6210,6222,6223,6228,6231,6774,6950,7175,7203,7314,7531,7534,7879,8021,9131,9520,9531,10075,10574,10575,10576,10694,10971,…	SLC25A6,CCT6A,CSE1L,FLNA,SFN,DNAJA1,HSPA4,HSPA5,HSPD1,JUP,KPNA1,KPNB1,KPNA2,KPNA3,TNPO1,IPO5,RPSA,PPP1R10,MAPK1,RAN,RANBP2,RPL3,RPL4,RPL5,RPL6,RPL7,RPL7A,RPL8,RPL9,RPL10,RPL11,RPL12,RPL13,RPL15,RPL17,RPL18,RPL18A,RPL21,RPL24,RPL27,RPL28,RPL35A,RPL38,RPLP0,RPLP1,RPS2,RPS3,RPS3A,RPS4X,RPS6,RPS7,RPS8,RPS9,RPS10,RPS13,RPS14,RPS15A,RPS18,RPS19,RPS23,RPS26,STAT3,TCP1,TPR,CCT3,UBB,YWHAE,YWHAZ,RAB7A,NUP2…
1_Member	Reactome Gene Sets	R-HSA-72689	Formation of a pool of free 40S subunits	-55.8367	-52.6637	47/101	3921,6122,6124,6125,6128,6129,6130,6132,6133,6134,6135,6136,6137,6138,6139,6141,6142,6144,6152,6155,6158,6165,6169,6175,6176,6187,6188,6189,6191,6194,6201,6202,6203,6204,6207,6208,6210,6222,6223,6228,6231,8661,8663,8668,10480,23521,51386	RPSA,RPL3,RPL4,RPL5,RPL6,RPL7,RPL7A,RPL8,RPL9,RPL10,RPL11,RPL12,RPL13,RPL15,RPL17,RPL18,RPL18A,RPL21,RPL24,RPL27,RPL28,RPL35A,RPL38,RPLP0,RPLP1,RPS2,RPS3,RPS3A,RPS4X,RPS6,RPS7,RPS8,RPS9,RPS10,RPS13,RPS14,RPS15A,RPS18,RPS19,RPS23,RPS26,EIF3A,EIF3C,EIF3I,EIF3M,RPL13A,EIF3L
1_Member	Reactome Gene Sets	R-HSA-168255	Influenza Infection	-55.4495	-52.3065	55/166	293,1213,3836,3837,3838,3839,3843,3921,5901,5903,6122,6124,6125,6128,6129,6130,6132,6133,6134,6135,6136,6137,6138,6139,6141,6142,6144,6152,6155,6158,6165,6169,6175,6176,6187,6188,6189,6191,6194,6201,6202,6203,6204,6207,6208,6210,6222,6223,6228,6231,7175,7514,8021,23521,55746	SLC25A6,CLTC,KPNA1,KPNB1,KPNA2,KPNA3,IPO5,RPSA,RAN,RANBP2,RPL3,RPL4,RPL5,RPL6,RPL7,RPL7A,RPL8,RPL9,RPL10,RPL11,RPL12,RPL13,RPL15,RPL17,RPL18,RPL18A,RPL21,RPL24,RPL27,RPL28,RPL35A,RPL38,RPLP0,RPLP1,RPS2,RPS3,RPS3A,RPS4X,RPS6,RPS7,RPS8,RPS9,RPS10,RPS13,RPS14,RPS15A,RPS18,RPS19,RPS23,RPS26,TPR,XPO1,NUP214,RPL13A,NUP133
1_Member	Reactome Gene Sets	R-HSA-156842	Eukaryotic Translation Elongation	-54.4514	-51.3364	45/93	1933,1936,1937,3921,6122,6124,6125,6128,6129,6130,6132,6133,6134,6135,6136,6137,6138,6139,6141,6142,6144,6152,6155,6158,6165,6169,6175,6176,6187,6188,6189,6191,6194,6201,6202,6203,6204,6207,6208,6210,6222,6223,6228,6231,23521	EEF1B2,EEF1D,EEF1G,RPSA,RPL3,RPL4,RPL5,RPL6,RPL7,RPL7A,RPL8,RPL9,RPL10,RPL11,RPL12,RPL13,RPL15,RPL17,RPL18,RPL18A,RPL21,RPL24,RPL27,RPL28,RPL35A,RPL38,RPLP0,RPLP1,RPS2,RPS3,RPS3A,RPS4X,RPS6,RPS7,RPS8,RPS9,RPS10,RPS13,RPS14,RPS15A,RPS18,RPS19,RPS23,RPS26,RPL13A
1_Member	GO Biological Processes	GO:0006413	translational initiation	-54.3667	-51.2781	57/192	1653,1654,1981,1982,1983,3315,3921,6122,6124,6125,6128,6129,6130,6132,6133,6134,6135,6136,6137,6138,6139,6141,6142,6144,6152,6155,6158,6165,6169,6175,6176,6187,6188,6189,6191,6194,6201,6202,6203,6204,6207,6208,6210,6222,6223,6228,6231,7175,8661,8663,8668,9470,10480,23521,26986,51386,728689	DDX1,DDX3X,EIF4G1,EIF4G2,EIF5,HSPB1,RPSA,RPL3,RPL4,RPL5,RPL6,RPL7,RPL7A,RPL8,RPL9,RPL10,RPL11,RPL12,RPL13,RPL15,RPL17,RPL18,RPL18A,RPL21,RPL24,RPL27,RPL28,RPL35A,RPL38,RPLP0,RPLP1,RPS2,RPS3,RPS3A,RPS4X,RPS6,RPS7,RPS8,RPS9,RPS10,RPS13,RPS14,RPS15A,RPS18,RPS19,RPS23,RPS26,TPR,EIF3A,EIF3C,EIF3I,EIF4E2,EIF3M,RPL13A,PABPC1,EIF3L,EIF3CL
1_Member	Reactome Gene Sets	R-HSA-975956	Nonsense Mediated Decay (NMD) independent of the Exon Junction Complex (EJC)	-53.9024	-50.8386	45/95	1981,3921,5976,6122,6124,6125,6128,6129,6130,6132,6133,6134,6135,6136,6137,6138,6139,6141,6142,6144,6152,6155,6158,6165,6169,6175,6176,6187,6188,6189,6191,6194,6201,6202,6203,6204,6207,6208,6210,6222,6223,6228,6231,23521,26986	EIF4G1,RPSA,UPF1,RPL3,RPL4,RPL5,RPL6,RPL7,RPL7A,RPL8,RPL9,RPL10,RPL11,RPL12,RPL13,RPL15,RPL17,RPL18,RPL18A,RPL21,RPL24,RPL27,RPL28,RPL35A,RPL38,RPLP0,RPLP1,RPS2,RPS3,RPS3A,RPS4X,RPS6,RPS7,RPS8,RPS9,RPS10,RPS13,RPS14,RPS15A,RPS18,RPS19,RPS23,RPS26,RPL13A,PABPC1
1_Member	Reactome Gene Sets	R-HSA-9010553	Regulation of expression of SLITs and ROBOs	-53.1236	-50.0833	54/171	1981,3921,5685,5690,5700,5705,5706,5707,5708,5718,6122,6124,6125,6128,6129,6130,6132,6133,6134,6135,6136,6137,6138,6139,6141,6142,6144,6152,6155,6158,6165,6169,6175,6176,6187,6188,6189,6191,6194,6201,6202,6203,6204,6207,6208,6210,6222,6223,6228,6231,7314,10197,23521,26986	EIF4G1,RPSA,PSMA4,PSMB2,PSMC1,PSMC5,PSMC6,PSMD1,PSMD2,PSMD12,RPL3,RPL4,RPL5,RPL6,RPL7,RPL7A,RPL8,RPL9,RPL10,RPL11,RPL12,RPL13,RPL15,RPL17,RPL18,RPL18A,RPL21,RPL24,RPL27,RPL28,RPL35A,RPL38,RPLP0,RPLP1,RPS2,RPS3,RPS3A,RPS4X,RPS6,RPS7,RPS8,RPS9,RPS10,RPS13,RPS14,RPS15A,RPS18,RPS19,RPS23,RPS26,UBB,PSME3,RPL13A,PABPC1
1_Member	CORUM	CORUM:306	Ribosome, cytoplasmic	-52.8179	-49.7999	42/80	3921,6122,6124,6125,6128,6129,6130,6132,6133,6134,6135,6136,6137,6138,6139,6141,6142,6144,6152,6155,6158,6165,6169,6175,6176,6187,6188,6189,6191,6194,6201,6202,6203,6204,6207,6208,6210,6222,6223,6228,6231,23521	RPSA,RPL3,RPL4,RPL5,RPL6,RPL7,RPL7A,RPL8,RPL9,RPL10,RPL11,RPL12,RPL13,RPL15,RPL17,RPL18,RPL18A,RPL21,RPL24,RPL27,RPL28,RPL35A,RPL38,RPLP0,RPLP1,RPS2,RPS3,RPS3A,RPS4X,RPS6,RPS7,RPS8,RPS9,RPS10,RPS13,RPS14,RPS15A,RPS18,RPS19,RPS23,RPS26,RPL13A
1_Member	Reactome Gene Sets	R-HSA-72766	Translation	-52.0143	-49.0174	64/291	1933,1936,1937,1981,1983,2058,3921,5464,5917,6122,6124,6125,6128,6129,6130,6132,6133,6134,6135,6136,6137,6138,6139,6141,6142,6144,6152,6155,6158,6165,6169,6175,6176,6184,6187,6188,6189,6191,6194,6201,6202,6203,6204,6207,6208,6210,6222,6223,6228,6231,6748,6897,7284,7407,8661,8663,8668,9255,10480,23521,26986,51081,51386,51520	EEF1B2,EEF1D,EEF1G,EIF4G1,EIF5,EPRS1,RPSA,PPA1,RARS1,RPL3,RPL4,RPL5,RPL6,RPL7,RPL7A,RPL8,RPL9,RPL10,RPL11,RPL12,RPL13,RPL15,RPL17,RPL18,RPL18A,RPL21,RPL24,RPL27,RPL28,RPL35A,RPL38,RPLP0,RPLP1,RPN1,RPS2,RPS3,RPS3A,RPS4X,RPS6,RPS7,RPS8,RPS9,RPS10,RPS13,RPS14,RPS15A,RPS18,RPS19,RPS23,RPS26,SSR4,TARS1,TUFM,VARS1,EIF3A,EIF3C,EIF3I,AIMP1,EIF3M,RPL13A,PABPC1,MRPS7,EIF3L,LARS1
1_Member	Reactome Gene Sets	R-HSA-2408522	Selenoamino acid metabolism	-51.8148	-48.8381	47/118	191,2058,3921,5917,6122,6124,6125,6128,6129,6130,6132,6133,6134,6135,6136,6137,6138,6139,6141,6142,6144,6152,6155,6158,6165,6169,6175,6176,6187,6188,6189,6191,6194,6201,6202,6203,6204,6207,6208,6210,6222,6223,6228,6231,9255,23521,51520	AHCY,EPRS1,RPSA,RARS1,RPL3,RPL4,RPL5,RPL6,RPL7,RPL7A,RPL8,RPL9,RPL10,RPL11,RPL12,RPL13,RPL15,RPL17,RPL18,RPL18A,RPL21,RPL24,RPL27,RPL28,RPL35A,RPL38,RPLP0,RPLP1,RPS2,RPS3,RPS3A,RPS4X,RPS6,RPS7,RPS8,RPS9,RPS10,RPS13,RPS14,RPS15A,RPS18,RPS19,RPS23,RPS26,AIMP1,RPL13A,LARS1
1_Member	GO Biological Processes	GO:0006412	translation	-51.467	-48.5096	90/723	1153,1653,1654,1660,1933,1936,1937,1981,1982,1983,1984,2058,3184,3315,3921,4691,5036,5464,5594,5725,5917,5976,6122,6124,6125,6128,6129,6130,6132,6133,6134,6135,6136,6137,6138,6139,6141,6142,6144,6152,6155,6158,6165,6169,6175,6176,6187,6188,6189,6191,6194,6201,6202,6203,6204,6207,6208,6210,6222,6223,6228,6231,6774,6897,7175,7284,7298,7407,7431,8570,8661,8663,8668,9255,9470,10128,10131,10399,10480,…	CIRBP,DDX1,DDX3X,DHX9,EEF1B2,EEF1D,EEF1G,EIF4G1,EIF4G2,EIF5,EIF5A,EPRS1,HNRNPD,HSPB1,RPSA,NCL,PA2G4,PPA1,MAPK1,PTBP1,RARS1,UPF1,RPL3,RPL4,RPL5,RPL6,RPL7,RPL7A,RPL8,RPL9,RPL10,RPL11,RPL12,RPL13,RPL15,RPL17,RPL18,RPL18A,RPL21,RPL24,RPL27,RPL28,RPL35A,RPL38,RPLP0,RPLP1,RPS2,RPS3,RPS3A,RPS4X,RPS6,RPS7,RPS8,RPS9,RPS10,RPS13,RPS14,RPS15A,RPS18,RPS19,RPS23,RPS26,STAT3,TARS1,TPR,TUFM,TYMS,VARS1,VIM,KHSRP…
1_Member	GO Biological Processes	GO:0043043	peptide biosynthetic process	-51.153	-48.2141	91/749	1153,1653,1654,1660,1933,1936,1937,1981,1982,1983,1984,2058,3184,3315,3921,4691,5036,5464,5594,5725,5917,5976,6122,6124,6125,6128,6129,6130,6132,6133,6134,6135,6136,6137,6138,6139,6141,6142,6144,6152,6155,6158,6165,6169,6175,6176,6187,6188,6189,6191,6194,6201,6202,6203,6204,6207,6208,6210,6222,6223,6228,6231,6774,6897,7175,7284,7298,7407,7431,8570,8661,8663,8668,9255,9470,10128,10131,10399,10480,…	CIRBP,DDX1,DDX3X,DHX9,EEF1B2,EEF1D,EEF1G,EIF4G1,EIF4G2,EIF5,EIF5A,EPRS1,HNRNPD,HSPB1,RPSA,NCL,PA2G4,PPA1,MAPK1,PTBP1,RARS1,UPF1,RPL3,RPL4,RPL5,RPL6,RPL7,RPL7A,RPL8,RPL9,RPL10,RPL11,RPL12,RPL13,RPL15,RPL17,RPL18,RPL18A,RPL21,RPL24,RPL27,RPL28,RPL35A,RPL38,RPLP0,RPLP1,RPS2,RPS3,RPS3A,RPS4X,RPS6,RPS7,RPS8,RPS9,RPS10,RPS13,RPS14,RPS15A,RPS18,RPS19,RPS23,RPS26,STAT3,TARS1,TPR,TUFM,TYMS,VARS1,VIM,KHSRP…
1_Member	Reactome Gene Sets	R-HSA-927802	Nonsense-Mediated Decay (NMD)	-50.8108	-47.9067	46/115	1981,3921,5976,6122,6124,6125,6128,6129,6130,6132,6133,6134,6135,6136,6137,6138,6139,6141,6142,6144,6152,6155,6158,6165,6169,6175,6176,6187,6188,6189,6191,6194,6201,6202,6203,6204,6207,6208,6210,6222,6223,6228,6231,23521,26986,55802	EIF4G1,RPSA,UPF1,RPL3,RPL4,RPL5,RPL6,RPL7,RPL7A,RPL8,RPL9,RPL10,RPL11,RPL12,RPL13,RPL15,RPL17,RPL18,RPL18A,RPL21,RPL24,RPL27,RPL28,RPL35A,RPL38,RPLP0,RPLP1,RPS2,RPS3,RPS3A,RPS4X,RPS6,RPS7,RPS8,RPS9,RPS10,RPS13,RPS14,RPS15A,RPS18,RPS19,RPS23,RPS26,RPL13A,PABPC1,DCP1A
1_Member	Reactome Gene Sets	R-HSA-975957	Nonsense Mediated Decay (NMD) enhanced by the Exon Junction Complex (EJC)	-50.8108	-47.9067	46/115	1981,3921,5976,6122,6124,6125,6128,6129,6130,6132,6133,6134,6135,6136,6137,6138,6139,6141,6142,6144,6152,6155,6158,6165,6169,6175,6176,6187,6188,6189,6191,6194,6201,6202,6203,6204,6207,6208,6210,6222,6223,6228,6231,23521,26986,55802	EIF4G1,RPSA,UPF1,RPL3,RPL4,RPL5,RPL6,RPL7,RPL7A,RPL8,RPL9,RPL10,RPL11,RPL12,RPL13,RPL15,RPL17,RPL18,RPL18A,RPL21,RPL24,RPL27,RPL28,RPL35A,RPL38,RPLP0,RPLP1,RPS2,RPS3,RPS3A,RPS4X,RPS6,RPS7,RPS8,RPS9,RPS10,RPS13,RPS14,RPS15A,RPS18,RPS19,RPS23,RPS26,RPL13A,PABPC1,DCP1A
1_Member	Reactome Gene Sets	R-HSA-2262752	Cellular responses to stress	-50.7565	-47.8688	82/585	1387,1778,2033,3008,3301,3308,3309,3313,3337,3921,4361,5034,5052,5594,5685,5690,5700,5705,5706,5707,5708,5718,5903,6122,6124,6125,6128,6129,6130,6132,6133,6134,6135,6136,6137,6138,6139,6141,6142,6144,6152,6155,6158,6165,6169,6175,6176,6187,6188,6189,6191,6194,6201,6202,6203,6204,6207,6208,6210,6222,6223,6228,6231,6774,7175,7266,7295,7314,7415,7531,8021,9531,9588,10197,10808,10935,10963,10985,2282…	CREBBP,DYNC1H1,EP300,H1-4,DNAJA1,HSPA4,HSPA5,HSPA9,DNAJB1,RPSA,MRE11,P4HB,PRDX1,MAPK1,PSMA4,PSMB2,PSMC1,PSMC5,PSMC6,PSMD1,PSMD2,PSMD12,RANBP2,RPL3,RPL4,RPL5,RPL6,RPL7,RPL7A,RPL8,RPL9,RPL10,RPL11,RPL12,RPL13,RPL15,RPL17,RPL18,RPL18A,RPL21,RPL24,RPL27,RPL28,RPL35A,RPL38,RPLP0,RPLP1,RPS2,RPS3,RPS3A,RPS4X,RPS6,RPS7,RPS8,RPS9,RPS10,RPS13,RPS14,RPS15A,RPS18,RPS19,RPS23,RPS26,STAT3,TPR,DNAJC7,TXN,UBB,VC…
1_Member	Reactome Gene Sets	R-HSA-156902	Peptide chain elongation	-50.2069	-47.335	42/89	3921,6122,6124,6125,6128,6129,6130,6132,6133,6134,6135,6136,6137,6138,6139,6141,6142,6144,6152,6155,6158,6165,6169,6175,6176,6187,6188,6189,6191,6194,6201,6202,6203,6204,6207,6208,6210,6222,6223,6228,6231,23521	RPSA,RPL3,RPL4,RPL5,RPL6,RPL7,RPL7A,RPL8,RPL9,RPL10,RPL11,RPL12,RPL13,RPL15,RPL17,RPL18,RPL18A,RPL21,RPL24,RPL27,RPL28,RPL35A,RPL38,RPLP0,RPLP1,RPS2,RPS3,RPS3A,RPS4X,RPS6,RPS7,RPS8,RPS9,RPS10,RPS13,RPS14,RPS15A,RPS18,RPS19,RPS23,RPS26,RPL13A
1_Member	Reactome Gene Sets	R-HSA-8953897	Cellular responses to external stimuli	-49.9333	-47.0766	82/599	1387,1778,2033,3008,3301,3308,3309,3313,3337,3921,4361,5034,5052,5594,5685,5690,5700,5705,5706,5707,5708,5718,5903,6122,6124,6125,6128,6129,6130,6132,6133,6134,6135,6136,6137,6138,6139,6141,6142,6144,6152,6155,6158,6165,6169,6175,6176,6187,6188,6189,6191,6194,6201,6202,6203,6204,6207,6208,6210,6222,6223,6228,6231,6774,7175,7266,7295,7314,7415,7531,8021,9531,9588,10197,10808,10935,10963,10985,2282…	CREBBP,DYNC1H1,EP300,H1-4,DNAJA1,HSPA4,HSPA5,HSPA9,DNAJB1,RPSA,MRE11,P4HB,PRDX1,MAPK1,PSMA4,PSMB2,PSMC1,PSMC5,PSMC6,PSMD1,PSMD2,PSMD12,RANBP2,RPL3,RPL4,RPL5,RPL6,RPL7,RPL7A,RPL8,RPL9,RPL10,RPL11,RPL12,RPL13,RPL15,RPL17,RPL18,RPL18A,RPL21,RPL24,RPL27,RPL28,RPL35A,RPL38,RPLP0,RPLP1,RPS2,RPS3,RPS3A,RPS4X,RPS6,RPS7,RPS8,RPS9,RPS10,RPS13,RPS14,RPS15A,RPS18,RPS19,RPS23,RPS26,STAT3,TPR,DNAJC7,TXN,UBB,VC…
1_Member	GO Biological Processes	GO:0000184	nuclear-transcribed mRNA catabolic process, nonsense-mediated decay	-49.7697	-46.9277	46/120	1981,3921,5976,6122,6124,6125,6128,6129,6130,6132,6133,6134,6135,6136,6137,6138,6139,6141,6142,6144,6152,6155,6158,6165,6169,6175,6176,6187,6188,6189,6191,6194,6201,6202,6203,6204,6207,6208,6210,6222,6223,6228,6231,23521,26986,55802	EIF4G1,RPSA,UPF1,RPL3,RPL4,RPL5,RPL6,RPL7,RPL7A,RPL8,RPL9,RPL10,RPL11,RPL12,RPL13,RPL15,RPL17,RPL18,RPL18A,RPL21,RPL24,RPL27,RPL28,RPL35A,RPL38,RPLP0,RPLP1,RPS2,RPS3,RPS3A,RPS4X,RPS6,RPS7,RPS8,RPS9,RPS10,RPS13,RPS14,RPS15A,RPS18,RPS19,RPS23,RPS26,RPL13A,PABPC1,DCP1A
1_Member	Reactome Gene Sets	R-HSA-2408557	Selenocysteine synthesis	-49.1651	-46.3511	42/93	3921,6122,6124,6125,6128,6129,6130,6132,6133,6134,6135,6136,6137,6138,6139,6141,6142,6144,6152,6155,6158,6165,6169,6175,6176,6187,6188,6189,6191,6194,6201,6202,6203,6204,6207,6208,6210,6222,6223,6228,6231,23521	RPSA,RPL3,RPL4,RPL5,RPL6,RPL7,RPL7A,RPL8,RPL9,RPL10,RPL11,RPL12,RPL13,RPL15,RPL17,RPL18,RPL18A,RPL21,RPL24,RPL27,RPL28,RPL35A,RPL38,RPLP0,RPLP1,RPS2,RPS3,RPS3A,RPS4X,RPS6,RPS7,RPS8,RPS9,RPS10,RPS13,RPS14,RPS15A,RPS18,RPS19,RPS23,RPS26,RPL13A
1_Member	Reactome Gene Sets	R-HSA-72764	Eukaryotic Translation Termination	-49.1651	-46.3511	42/93	3921,6122,6124,6125,6128,6129,6130,6132,6133,6134,6135,6136,6137,6138,6139,6141,6142,6144,6152,6155,6158,6165,6169,6175,6176,6187,6188,6189,6191,6194,6201,6202,6203,6204,6207,6208,6210,6222,6223,6228,6231,23521	RPSA,RPL3,RPL4,RPL5,RPL6,RPL7,RPL7A,RPL8,RPL9,RPL10,RPL11,RPL12,RPL13,RPL15,RPL17,RPL18,RPL18A,RPL21,RPL24,RPL27,RPL28,RPL35A,RPL38,RPLP0,RPLP1,RPS2,RPS3,RPS3A,RPS4X,RPS6,RPS7,RPS8,RPS9,RPS10,RPS13,RPS14,RPS15A,RPS18,RPS19,RPS23,RPS26,RPL13A
1_Member	Reactome Gene Sets	R-HSA-9633012	Response of EIF2AK4 (GCN2) to amino acid deficiency	-48.9357	-46.1351	43/101	3921,6122,6124,6125,6128,6129,6130,6132,6133,6134,6135,6136,6137,6138,6139,6141,6142,6144,6152,6155,6158,6165,6169,6175,6176,6187,6188,6189,6191,6194,6201,6202,6203,6204,6207,6208,6210,6222,6223,6228,6231,10985,23521	RPSA,RPL3,RPL4,RPL5,RPL6,RPL7,RPL7A,RPL8,RPL9,RPL10,RPL11,RPL12,RPL13,RPL15,RPL17,RPL18,RPL18A,RPL21,RPL24,RPL27,RPL28,RPL35A,RPL38,RPLP0,RPLP1,RPS2,RPS3,RPS3A,RPS4X,RPS6,RPS7,RPS8,RPS9,RPS10,RPS13,RPS14,RPS15A,RPS18,RPS19,RPS23,RPS26,GCN1,RPL13A
1_Member	GO Biological Processes	GO:0006614	SRP-dependent cotranslational protein targeting to membrane	-48.6673	-45.8797	42/95	3921,6122,6124,6125,6128,6129,6130,6132,6133,6134,6135,6136,6137,6138,6139,6141,6142,6144,6152,6155,6158,6165,6169,6175,6176,6187,6188,6189,6191,6194,6201,6202,6203,6204,6207,6208,6210,6222,6223,6228,6231,23521	RPSA,RPL3,RPL4,RPL5,RPL6,RPL7,RPL7A,RPL8,RPL9,RPL10,RPL11,RPL12,RPL13,RPL15,RPL17,RPL18,RPL18A,RPL21,RPL24,RPL27,RPL28,RPL35A,RPL38,RPLP0,RPLP1,RPS2,RPS3,RPS3A,RPS4X,RPS6,RPS7,RPS8,RPS9,RPS10,RPS13,RPS14,RPS15A,RPS18,RPS19,RPS23,RPS26,RPL13A
1_Member	Reactome Gene Sets	R-HSA-1799339	SRP-dependent cotranslational protein targeting to membrane	-48.1692	-45.3942	44/112	3921,6122,6124,6125,6128,6129,6130,6132,6133,6134,6135,6136,6137,6138,6139,6141,6142,6144,6152,6155,6158,6165,6169,6175,6176,6184,6187,6188,6189,6191,6194,6201,6202,6203,6204,6207,6208,6210,6222,6223,6228,6231,6748,23521	RPSA,RPL3,RPL4,RPL5,RPL6,RPL7,RPL7A,RPL8,RPL9,RPL10,RPL11,RPL12,RPL13,RPL15,RPL17,RPL18,RPL18A,RPL21,RPL24,RPL27,RPL28,RPL35A,RPL38,RPLP0,RPLP1,RPN1,RPS2,RPS3,RPS3A,RPS4X,RPS6,RPS7,RPS8,RPS9,RPS10,RPS13,RPS14,RPS15A,RPS18,RPS19,RPS23,RPS26,SSR4,RPL13A
1_Member	Reactome Gene Sets	R-HSA-376176	Signaling by ROBO receptors	-48.109	-45.3462	55/218	1981,3921,5216,5685,5690,5700,5705,5706,5707,5708,5718,6122,6124,6125,6128,6129,6130,6132,6133,6134,6135,6136,6137,6138,6139,6141,6142,6144,6152,6155,6158,6165,6169,6175,6176,6187,6188,6189,6191,6194,6201,6202,6203,6204,6207,6208,6210,6222,6223,6228,6231,7314,10197,23521,26986	EIF4G1,RPSA,PFN1,PSMA4,PSMB2,PSMC1,PSMC5,PSMC6,PSMD1,PSMD2,PSMD12,RPL3,RPL4,RPL5,RPL6,RPL7,RPL7A,RPL8,RPL9,RPL10,RPL11,RPL12,RPL13,RPL15,RPL17,RPL18,RPL18A,RPL21,RPL24,RPL27,RPL28,RPL35A,RPL38,RPLP0,RPLP1,RPS2,RPS3,RPS3A,RPS4X,RPS6,RPS7,RPS8,RPS9,RPS10,RPS13,RPS14,RPS15A,RPS18,RPS19,RPS23,RPS26,UBB,PSME3,RPL13A,PABPC1
1_Member	GO Biological Processes	GO:0006613	cotranslational protein targeting to membrane	-47.714	-44.963	42/99	3921,6122,6124,6125,6128,6129,6130,6132,6133,6134,6135,6136,6137,6138,6139,6141,6142,6144,6152,6155,6158,6165,6169,6175,6176,6187,6188,6189,6191,6194,6201,6202,6203,6204,6207,6208,6210,6222,6223,6228,6231,23521	RPSA,RPL3,RPL4,RPL5,RPL6,RPL7,RPL7A,RPL8,RPL9,RPL10,RPL11,RPL12,RPL13,RPL15,RPL17,RPL18,RPL18A,RPL21,RPL24,RPL27,RPL28,RPL35A,RPL38,RPLP0,RPLP1,RPS2,RPS3,RPS3A,RPS4X,RPS6,RPS7,RPS8,RPS9,RPS10,RPS13,RPS14,RPS15A,RPS18,RPS19,RPS23,RPS26,RPL13A
1_Member	Reactome Gene Sets	R-HSA-192823	Viral mRNA Translation	-47.4838	-44.7445	42/100	3921,6122,6124,6125,6128,6129,6130,6132,6133,6134,6135,6136,6137,6138,6139,6141,6142,6144,6152,6155,6158,6165,6169,6175,6176,6187,6188,6189,6191,6194,6201,6202,6203,6204,6207,6208,6210,6222,6223,6228,6231,23521	RPSA,RPL3,RPL4,RPL5,RPL6,RPL7,RPL7A,RPL8,RPL9,RPL10,RPL11,RPL12,RPL13,RPL15,RPL17,RPL18,RPL18A,RPL21,RPL24,RPL27,RPL28,RPL35A,RPL38,RPLP0,RPLP1,RPS2,RPS3,RPS3A,RPS4X,RPS6,RPS7,RPS8,RPS9,RPS10,RPS13,RPS14,RPS15A,RPS18,RPS19,RPS23,RPS26,RPL13A
1_Member	GO Biological Processes	GO:0045047	protein targeting to ER	-47.1665	-44.4385	43/109	3309,3921,6122,6124,6125,6128,6129,6130,6132,6133,6134,6135,6136,6137,6138,6139,6141,6142,6144,6152,6155,6158,6165,6169,6175,6176,6187,6188,6189,6191,6194,6201,6202,6203,6204,6207,6208,6210,6222,6223,6228,6231,23521	HSPA5,RPSA,RPL3,RPL4,RPL5,RPL6,RPL7,RPL7A,RPL8,RPL9,RPL10,RPL11,RPL12,RPL13,RPL15,RPL17,RPL18,RPL18A,RPL21,RPL24,RPL27,RPL28,RPL35A,RPL38,RPLP0,RPLP1,RPS2,RPS3,RPS3A,RPS4X,RPS6,RPS7,RPS8,RPS9,RPS10,RPS13,RPS14,RPS15A,RPS18,RPS19,RPS23,RPS26,RPL13A
1_Member	GO Biological Processes	GO:0019080	viral gene expression	-46.9577	-44.2407	52/194	1660,2033,3921,5094,5725,5903,6122,6124,6125,6128,6129,6130,6132,6133,6134,6135,6136,6137,6138,6139,6141,6142,6144,6152,6155,6158,6165,6169,6175,6176,6187,6188,6189,6191,6194,6201,6202,6203,6204,6207,6208,6210,6222,6223,6228,6231,7175,8021,8661,23521,51386,55746	DHX9,EP300,RPSA,PCBP2,PTBP1,RANBP2,RPL3,RPL4,RPL5,RPL6,RPL7,RPL7A,RPL8,RPL9,RPL10,RPL11,RPL12,RPL13,RPL15,RPL17,RPL18,RPL18A,RPL21,RPL24,RPL27,RPL28,RPL35A,RPL38,RPLP0,RPLP1,RPS2,RPS3,RPS3A,RPS4X,RPS6,RPS7,RPS8,RPS9,RPS10,RPS13,RPS14,RPS15A,RPS18,RPS19,RPS23,RPS26,TPR,NUP214,EIF3A,RPL13A,EIF3L,NUP133
1_Member	Reactome Gene Sets	R-HSA-168273	Influenza Viral RNA Transcription and Replication	-46.7962	-44.0899	47/145	3843,3921,5903,6122,6124,6125,6128,6129,6130,6132,6133,6134,6135,6136,6137,6138,6139,6141,6142,6144,6152,6155,6158,6165,6169,6175,6176,6187,6188,6189,6191,6194,6201,6202,6203,6204,6207,6208,6210,6222,6223,6228,6231,7175,8021,23521,55746	IPO5,RPSA,RANBP2,RPL3,RPL4,RPL5,RPL6,RPL7,RPL7A,RPL8,RPL9,RPL10,RPL11,RPL12,RPL13,RPL15,RPL17,RPL18,RPL18A,RPL21,RPL24,RPL27,RPL28,RPL35A,RPL38,RPLP0,RPLP1,RPS2,RPS3,RPS3A,RPS4X,RPS6,RPS7,RPS8,RPS9,RPS10,RPS13,RPS14,RPS15A,RPS18,RPS19,RPS23,RPS26,TPR,NUP214,RPL13A,NUP133
1_Member	CORUM	CORUM:3055	Nop56p-associated pre-rRNA complex	-46.5935	-43.8976	42/104	1660,3178,3192,4670,4673,4691,6122,6124,6125,6128,6129,6130,6132,6133,6134,6135,6136,6137,6138,6139,6141,6142,6144,6152,6155,6158,6165,6175,6176,6187,6189,6194,6201,6202,6203,6207,6208,6210,6222,6228,7284,23521	DHX9,HNRNPA1,HNRNPU,HNRNPM,NAP1L1,NCL,RPL3,RPL4,RPL5,RPL6,RPL7,RPL7A,RPL8,RPL9,RPL10,RPL11,RPL12,RPL13,RPL15,RPL17,RPL18,RPL18A,RPL21,RPL24,RPL27,RPL28,RPL35A,RPLP0,RPLP1,RPS2,RPS3A,RPS6,RPS7,RPS8,RPS9,RPS13,RPS14,RPS15A,RPS18,RPS23,TUFM,RPL13A
1_Member	GO Biological Processes	GO:0072599	establishment of protein localization to endoplasmic reticulum	-46.3457	-43.6601	43/113	3309,3921,6122,6124,6125,6128,6129,6130,6132,6133,6134,6135,6136,6137,6138,6139,6141,6142,6144,6152,6155,6158,6165,6169,6175,6176,6187,6188,6189,6191,6194,6201,6202,6203,6204,6207,6208,6210,6222,6223,6228,6231,23521	HSPA5,RPSA,RPL3,RPL4,RPL5,RPL6,RPL7,RPL7A,RPL8,RPL9,RPL10,RPL11,RPL12,RPL13,RPL15,RPL17,RPL18,RPL18A,RPL21,RPL24,RPL27,RPL28,RPL35A,RPL38,RPLP0,RPLP1,RPS2,RPS3,RPS3A,RPS4X,RPS6,RPS7,RPS8,RPS9,RPS10,RPS13,RPS14,RPS15A,RPS18,RPS19,RPS23,RPS26,RPL13A
1_Member	Reactome Gene Sets	R-HSA-71291	Metabolism of amino acids and derivatives	-44.7801	-42.1044	64/374	38,191,223,501,1738,2058,3028,3921,5685,5690,5700,5705,5706,5707,5708,5718,5832,5917,6122,6124,6125,6128,6129,6130,6132,6133,6134,6135,6136,6137,6138,6139,6141,6142,6144,6152,6155,6158,6165,6169,6175,6176,6187,6188,6189,6191,6194,6201,6202,6203,6204,6207,6208,6210,6222,6223,6228,6231,9255,10165,10197,23521,26227,51520	ACAT1,AHCY,ALDH9A1,ALDH7A1,DLD,EPRS1,HSD17B10,RPSA,PSMA4,PSMB2,PSMC1,PSMC5,PSMC6,PSMD1,PSMD2,PSMD12,ALDH18A1,RARS1,RPL3,RPL4,RPL5,RPL6,RPL7,RPL7A,RPL8,RPL9,RPL10,RPL11,RPL12,RPL13,RPL15,RPL17,RPL18,RPL18A,RPL21,RPL24,RPL27,RPL28,RPL35A,RPL38,RPLP0,RPLP1,RPS2,RPS3,RPS3A,RPS4X,RPS6,RPS7,RPS8,RPS9,RPS10,RPS13,RPS14,RPS15A,RPS18,RPS19,RPS23,RPS26,AIMP1,SLC25A13,PSME3,RPL13A,PHGDH,LARS1
1_Member	GO Biological Processes	GO:0019083	viral transcription	-43.5861	-40.9202	48/177	1660,2033,3921,5903,6122,6124,6125,6128,6129,6130,6132,6133,6134,6135,6136,6137,6138,6139,6141,6142,6144,6152,6155,6158,6165,6169,6175,6176,6187,6188,6189,6191,6194,6201,6202,6203,6204,6207,6208,6210,6222,6223,6228,6231,7175,8021,23521,55746	DHX9,EP300,RPSA,RANBP2,RPL3,RPL4,RPL5,RPL6,RPL7,RPL7A,RPL8,RPL9,RPL10,RPL11,RPL12,RPL13,RPL15,RPL17,RPL18,RPL18A,RPL21,RPL24,RPL27,RPL28,RPL35A,RPL38,RPLP0,RPLP1,RPS2,RPS3,RPS3A,RPS4X,RPS6,RPS7,RPS8,RPS9,RPS10,RPS13,RPS14,RPS15A,RPS18,RPS19,RPS23,RPS26,TPR,NUP214,RPL13A,NUP133
1_Member	GO Biological Processes	GO:0000956	nuclear-transcribed mRNA catabolic process	-42.3268	-39.6705	50/210	1655,1656,1981,3921,5976,6122,6124,6125,6128,6129,6130,6132,6133,6134,6135,6136,6137,6138,6139,6141,6142,6144,6152,6155,6158,6165,6169,6175,6176,6187,6188,6189,6191,6194,6201,6202,6203,6204,6207,6208,6210,6222,6223,6228,6231,23019,23521,26986,54464,55802	DDX5,DDX6,EIF4G1,RPSA,UPF1,RPL3,RPL4,RPL5,RPL6,RPL7,RPL7A,RPL8,RPL9,RPL10,RPL11,RPL12,RPL13,RPL15,RPL17,RPL18,RPL18A,RPL21,RPL24,RPL27,RPL28,RPL35A,RPL38,RPLP0,RPLP1,RPS2,RPS3,RPS3A,RPS4X,RPS6,RPS7,RPS8,RPS9,RPS10,RPS13,RPS14,RPS15A,RPS18,RPS19,RPS23,RPS26,CNOT1,RPL13A,PABPC1,XRN1,DCP1A
1_Member	GO Biological Processes	GO:0070972	protein localization to endoplasmic reticulum	-41.7961	-39.1491	43/139	3309,3921,6122,6124,6125,6128,6129,6130,6132,6133,6134,6135,6136,6137,6138,6139,6141,6142,6144,6152,6155,6158,6165,6169,6175,6176,6187,6188,6189,6191,6194,6201,6202,6203,6204,6207,6208,6210,6222,6223,6228,6231,23521	HSPA5,RPSA,RPL3,RPL4,RPL5,RPL6,RPL7,RPL7A,RPL8,RPL9,RPL10,RPL11,RPL12,RPL13,RPL15,RPL17,RPL18,RPL18A,RPL21,RPL24,RPL27,RPL28,RPL35A,RPL38,RPLP0,RPLP1,RPS2,RPS3,RPS3A,RPS4X,RPS6,RPS7,RPS8,RPS9,RPS10,RPS13,RPS14,RPS15A,RPS18,RPS19,RPS23,RPS26,RPL13A
1_Member	KEGG Pathway	hsa03010	Ribosome	-41.19	-38.5521	44/153	3921,6122,6124,6125,6128,6129,6130,6132,6133,6134,6135,6136,6137,6138,6139,6141,6142,6144,6152,6155,6158,6165,6169,6175,6176,6187,6188,6189,6191,6194,6201,6202,6203,6204,6207,6208,6210,6222,6223,6228,6231,23521,51081,100526842	RPSA,RPL3,RPL4,RPL5,RPL6,RPL7,RPL7A,RPL8,RPL9,RPL10,RPL11,RPL12,RPL13,RPL15,RPL17,RPL18,RPL18A,RPL21,RPL24,RPL27,RPL28,RPL35A,RPL38,RPLP0,RPLP1,RPS2,RPS3,RPS3A,RPS4X,RPS6,RPS7,RPS8,RPS9,RPS10,RPS13,RPS14,RPS15A,RPS18,RPS19,RPS23,RPS26,RPL13A,MRPS7,RPL17-C18orf32
1_Member	GO Biological Processes	GO:0006612	protein targeting to membrane	-37.5237	-34.8947	45/194	2664,3309,3921,6122,6124,6125,6128,6129,6130,6132,6133,6134,6135,6136,6137,6138,6139,6141,6142,6144,6152,6155,6158,6165,6169,6175,6176,6187,6188,6189,6191,6194,6201,6202,6203,6204,6207,6208,6210,6222,6223,6228,6231,9747,23521	GDI1,HSPA5,RPSA,RPL3,RPL4,RPL5,RPL6,RPL7,RPL7A,RPL8,RPL9,RPL10,RPL11,RPL12,RPL13,RPL15,RPL17,RPL18,RPL18A,RPL21,RPL24,RPL27,RPL28,RPL35A,RPL38,RPLP0,RPLP1,RPS2,RPS3,RPS3A,RPS4X,RPS6,RPS7,RPS8,RPS9,RPS10,RPS13,RPS14,RPS15A,RPS18,RPS19,RPS23,RPS26,TCAF1,RPL13A
1_Member	Reactome Gene Sets	R-HSA-6791226	Major pathway of rRNA processing in the nucleolus and cytosol	-35.786	-33.1659	43/186	3921,4691,6122,6124,6125,6128,6129,6130,6132,6133,6134,6135,6136,6137,6138,6139,6141,6142,6144,6152,6155,6158,6165,6169,6175,6176,6187,6188,6189,6191,6194,6201,6202,6203,6204,6207,6208,6210,6222,6223,6228,6231,23521	RPSA,NCL,RPL3,RPL4,RPL5,RPL6,RPL7,RPL7A,RPL8,RPL9,RPL10,RPL11,RPL12,RPL13,RPL15,RPL17,RPL18,RPL18A,RPL21,RPL24,RPL27,RPL28,RPL35A,RPL38,RPLP0,RPLP1,RPS2,RPS3,RPS3A,RPS4X,RPS6,RPS7,RPS8,RPS9,RPS10,RPS13,RPS14,RPS15A,RPS18,RPS19,RPS23,RPS26,RPL13A
1_Member	GO Biological Processes	GO:0090150	establishment of protein localization to membrane	-35.776	-33.1645	53/326	2664,2810,3308,3309,3921,4301,6122,6124,6125,6128,6129,6130,6132,6133,6134,6135,6136,6137,6138,6139,6141,6142,6144,6152,6155,6158,6165,6169,6175,6176,6187,6188,6189,6191,6194,6201,6202,6203,6204,6207,6208,6210,6222,6223,6228,6231,7531,7534,9747,10399,10971,23521,55750	GDI1,SFN,HSPA4,HSPA5,RPSA,AFDN,RPL3,RPL4,RPL5,RPL6,RPL7,RPL7A,RPL8,RPL9,RPL10,RPL11,RPL12,RPL13,RPL15,RPL17,RPL18,RPL18A,RPL21,RPL24,RPL27,RPL28,RPL35A,RPL38,RPLP0,RPLP1,RPS2,RPS3,RPS3A,RPS4X,RPS6,RPS7,RPS8,RPS9,RPS10,RPS13,RPS14,RPS15A,RPS18,RPS19,RPS23,RPS26,YWHAE,YWHAZ,TCAF1,RACK1,YWHAQ,RPL13A,AGK
1_Member	Reactome Gene Sets	R-HSA-72312	rRNA processing	-35.0145	-32.4114	44/206	3028,3921,4691,6122,6124,6125,6128,6129,6130,6132,6133,6134,6135,6136,6137,6138,6139,6141,6142,6144,6152,6155,6158,6165,6169,6175,6176,6187,6188,6189,6191,6194,6201,6202,6203,6204,6207,6208,6210,6222,6223,6228,6231,23521	HSD17B10,RPSA,NCL,RPL3,RPL4,RPL5,RPL6,RPL7,RPL7A,RPL8,RPL9,RPL10,RPL11,RPL12,RPL13,RPL15,RPL17,RPL18,RPL18A,RPL21,RPL24,RPL27,RPL28,RPL35A,RPL38,RPLP0,RPLP1,RPS2,RPS3,RPS3A,RPS4X,RPS6,RPS7,RPS8,RPS9,RPS10,RPS13,RPS14,RPS15A,RPS18,RPS19,RPS23,RPS26,RPL13A
1_Member	GO Biological Processes	GO:0006605	protein targeting	-34.8027	-32.2079	58/426	293,2664,3308,3309,3329,3921,6122,6124,6125,6128,6129,6130,6132,6133,6134,6135,6136,6137,6138,6139,6141,6142,6144,6152,6155,6158,6165,6169,6175,6176,6187,6188,6189,6191,6194,6201,6202,6203,6204,6207,6208,6210,6222,6223,6228,6231,7314,7531,7534,7879,9131,9520,9531,9747,10075,10971,23521,55750	SLC25A6,GDI1,HSPA4,HSPA5,HSPD1,RPSA,RPL3,RPL4,RPL5,RPL6,RPL7,RPL7A,RPL8,RPL9,RPL10,RPL11,RPL12,RPL13,RPL15,RPL17,RPL18,RPL18A,RPL21,RPL24,RPL27,RPL28,RPL35A,RPL38,RPLP0,RPLP1,RPS2,RPS3,RPS3A,RPS4X,RPS6,RPS7,RPS8,RPS9,RPS10,RPS13,RPS14,RPS15A,RPS18,RPS19,RPS23,RPS26,UBB,YWHAE,YWHAZ,RAB7A,AIFM1,NPEPPS,BAG3,TCAF1,HUWE1,YWHAQ,RPL13A,AGK
1_Member	Reactome Gene Sets	R-HSA-8868773	rRNA processing in the nucleus and cytosol	-34.7456	-32.1589	43/196	3921,4691,6122,6124,6125,6128,6129,6130,6132,6133,6134,6135,6136,6137,6138,6139,6141,6142,6144,6152,6155,6158,6165,6169,6175,6176,6187,6188,6189,6191,6194,6201,6202,6203,6204,6207,6208,6210,6222,6223,6228,6231,23521	RPSA,NCL,RPL3,RPL4,RPL5,RPL6,RPL7,RPL7A,RPL8,RPL9,RPL10,RPL11,RPL12,RPL13,RPL15,RPL17,RPL18,RPL18A,RPL21,RPL24,RPL27,RPL28,RPL35A,RPL38,RPLP0,RPLP1,RPS2,RPS3,RPS3A,RPS4X,RPS6,RPS7,RPS8,RPS9,RPS10,RPS13,RPS14,RPS15A,RPS18,RPS19,RPS23,RPS26,RPL13A
1_Member	CORUM	CORUM:308	60S ribosomal subunit, cytoplasmic	-31.7141	-29.1353	25/47	6122,6124,6125,6128,6129,6130,6132,6133,6134,6135,6136,6137,6138,6139,6141,6142,6144,6152,6155,6158,6165,6169,6175,6176,23521	RPL3,RPL4,RPL5,RPL6,RPL7,RPL7A,RPL8,RPL9,RPL10,RPL11,RPL12,RPL13,RPL15,RPL17,RPL18,RPL18A,RPL21,RPL24,RPL27,RPL28,RPL35A,RPL38,RPLP0,RPLP1,RPL13A
1_Member	Reactome Gene Sets	R-HSA-422475	Axon guidance	-31.3938	-28.8229	61/552	1072,1213,1981,3921,4627,5216,5594,5685,5690,5700,5705,5706,5707,5708,5718,6122,6124,6125,6128,6129,6130,6132,6133,6134,6135,6136,6137,6138,6139,6141,6142,6144,6152,6155,6158,6165,6169,6175,6176,6187,6188,6189,6191,6194,6201,6202,6203,6204,6207,6208,6210,6222,6223,6228,6231,7094,7314,7430,10197,23521,26986	CFL1,CLTC,EIF4G1,RPSA,MYH9,PFN1,MAPK1,PSMA4,PSMB2,PSMC1,PSMC5,PSMC6,PSMD1,PSMD2,PSMD12,RPL3,RPL4,RPL5,RPL6,RPL7,RPL7A,RPL8,RPL9,RPL10,RPL11,RPL12,RPL13,RPL15,RPL17,RPL18,RPL18A,RPL21,RPL24,RPL27,RPL28,RPL35A,RPL38,RPLP0,RPLP1,RPS2,RPS3,RPS3A,RPS4X,RPS6,RPS7,RPS8,RPS9,RPS10,RPS13,RPS14,RPS15A,RPS18,RPS19,RPS23,RPS26,TLN1,UBB,EZR,PSME3,RPL13A,PABPC1
1_Member	Reactome Gene Sets	R-HSA-9675108	Nervous system development	-31.2211	-28.6578	62/577	1072,1213,1981,3066,3921,4627,5216,5594,5685,5690,5700,5705,5706,5707,5708,5718,6122,6124,6125,6128,6129,6130,6132,6133,6134,6135,6136,6137,6138,6139,6141,6142,6144,6152,6155,6158,6165,6169,6175,6176,6187,6188,6189,6191,6194,6201,6202,6203,6204,6207,6208,6210,6222,6223,6228,6231,7094,7314,7430,10197,23521,26986	CFL1,CLTC,EIF4G1,HDAC2,RPSA,MYH9,PFN1,MAPK1,PSMA4,PSMB2,PSMC1,PSMC5,PSMC6,PSMD1,PSMD2,PSMD12,RPL3,RPL4,RPL5,RPL6,RPL7,RPL7A,RPL8,RPL9,RPL10,RPL11,RPL12,RPL13,RPL15,RPL17,RPL18,RPL18A,RPL21,RPL24,RPL27,RPL28,RPL35A,RPL38,RPLP0,RPLP1,RPS2,RPS3,RPS3A,RPS4X,RPS6,RPS7,RPS8,RPS9,RPS10,RPS13,RPS14,RPS15A,RPS18,RPS19,RPS23,RPS26,TLN1,UBB,EZR,PSME3,RPL13A,PABPC1
1_Member	Reactome Gene Sets	R-HSA-72649	Translation initiation complex formation	-27.0538	-24.5055	24/58	1981,3921,6187,6188,6189,6191,6194,6201,6202,6203,6204,6207,6208,6210,6222,6223,6228,6231,8661,8663,8668,10480,26986,51386	EIF4G1,RPSA,RPS2,RPS3,RPS3A,RPS4X,RPS6,RPS7,RPS8,RPS9,RPS10,RPS13,RPS14,RPS15A,RPS18,RPS19,RPS23,RPS26,EIF3A,EIF3C,EIF3I,EIF3M,PABPC1,EIF3L
1_Member	Reactome Gene Sets	R-HSA-72702	Ribosomal scanning and start codon recognition	-27.0538	-24.5055	24/58	1981,1983,3921,6187,6188,6189,6191,6194,6201,6202,6203,6204,6207,6208,6210,6222,6223,6228,6231,8661,8663,8668,10480,51386	EIF4G1,EIF5,RPSA,RPS2,RPS3,RPS3A,RPS4X,RPS6,RPS7,RPS8,RPS9,RPS10,RPS13,RPS14,RPS15A,RPS18,RPS19,RPS23,RPS26,EIF3A,EIF3C,EIF3I,EIF3M,EIF3L
1_Member	Reactome Gene Sets	R-HSA-72662	Activation of the mRNA upon binding of the cap-binding complex and eIFs, and subsequent binding to 4	-26.8336	-24.2927	24/59	1981,3921,6187,6188,6189,6191,6194,6201,6202,6203,6204,6207,6208,6210,6222,6223,6228,6231,8661,8663,8668,10480,26986,51386	EIF4G1,RPSA,RPS2,RPS3,RPS3A,RPS4X,RPS6,RPS7,RPS8,RPS9,RPS10,RPS13,RPS14,RPS15A,RPS18,RPS19,RPS23,RPS26,EIF3A,EIF3C,EIF3I,EIF3M,PABPC1,EIF3L
1_Member	GO Biological Processes	GO:0072657	protein localization to membrane	-26.6611	-24.1273	59/625	1213,1399,2316,2664,2810,3308,3309,3728,3921,4301,6122,6124,6125,6128,6129,6130,6132,6133,6134,6135,6136,6137,6138,6139,6141,6142,6144,6152,6155,6158,6165,6169,6175,6176,6187,6188,6189,6191,6194,6201,6202,6203,6204,6207,6208,6210,6222,6223,6228,6231,7430,7531,7534,8878,9747,10399,10971,23521,55750	CLTC,CRKL,FLNA,GDI1,SFN,HSPA4,HSPA5,JUP,RPSA,AFDN,RPL3,RPL4,RPL5,RPL6,RPL7,RPL7A,RPL8,RPL9,RPL10,RPL11,RPL12,RPL13,RPL15,RPL17,RPL18,RPL18A,RPL21,RPL24,RPL27,RPL28,RPL35A,RPL38,RPLP0,RPLP1,RPS2,RPS3,RPS3A,RPS4X,RPS6,RPS7,RPS8,RPS9,RPS10,RPS13,RPS14,RPS15A,RPS18,RPS19,RPS23,RPS26,EZR,YWHAE,YWHAZ,SQSTM1,TCAF1,RACK1,YWHAQ,RPL13A,AGK
1_Member	GO Biological Processes	GO:0022613	ribonucleoprotein complex biogenesis	-26.1571	-23.6304	51/462	1153,1653,1654,1656,1660,1778,1983,3921,5036,5901,6122,6125,6128,6129,6130,6134,6135,6136,6152,6155,6165,6169,6175,6187,6194,6201,6202,6203,6204,6208,6223,6228,6606,6632,7514,8450,8661,8663,8668,10480,10521,10594,11171,23019,23020,23451,23521,27316,51081,51386,728689	CIRBP,DDX1,DDX3X,DDX6,DHX9,DYNC1H1,EIF5,RPSA,PA2G4,RAN,RPL3,RPL5,RPL6,RPL7,RPL7A,RPL10,RPL11,RPL12,RPL24,RPL27,RPL35A,RPL38,RPLP0,RPS2,RPS6,RPS7,RPS8,RPS9,RPS10,RPS14,RPS19,RPS23,SMN1,SNRPD1,XPO1,CUL4B,EIF3A,EIF3C,EIF3I,EIF3M,DDX17,PRPF8,STRAP,CNOT1,SNRNP200,SF3B1,RPL13A,RBMX,MRPS7,EIF3L,EIF3CL
1_Member	Reactome Gene Sets	R-HSA-72695	Formation of the ternary complex, and subsequently, the 43S complex	-25.3337	-22.8139	22/51	3921,6187,6188,6189,6191,6194,6201,6202,6203,6204,6207,6208,6210,6222,6223,6228,6231,8661,8663,8668,10480,51386	RPSA,RPS2,RPS3,RPS3A,RPS4X,RPS6,RPS7,RPS8,RPS9,RPS10,RPS13,RPS14,RPS15A,RPS18,RPS19,RPS23,RPS26,EIF3A,EIF3C,EIF3I,EIF3M,EIF3L
1_Member	GO Biological Processes	GO:0071826	ribonucleoprotein complex subunit organization	-24.5401	-22.0339	38/250	1153,1653,1654,1656,1660,1778,1983,3921,6122,6125,6128,6134,6135,6136,6152,6169,6175,6204,6208,6223,6228,6606,6632,7415,8661,8663,8668,10480,10594,11171,23019,23020,23451,23521,27316,51081,51386,728689	CIRBP,DDX1,DDX3X,DDX6,DHX9,DYNC1H1,EIF5,RPSA,RPL3,RPL5,RPL6,RPL10,RPL11,RPL12,RPL24,RPL38,RPLP0,RPS10,RPS14,RPS19,RPS23,SMN1,SNRPD1,VCP,EIF3A,EIF3C,EIF3I,EIF3M,PRPF8,STRAP,CNOT1,SNRNP200,SF3B1,RPL13A,RBMX,MRPS7,EIF3L,EIF3CL
1_Member	GO Biological Processes	GO:0022618	ribonucleoprotein complex assembly	-24.3913	-21.8918	37/236	1153,1653,1654,1656,1660,1778,1983,3921,6122,6125,6128,6134,6135,6136,6152,6169,6175,6204,6208,6223,6228,6606,6632,8661,8663,8668,10480,10594,11171,23019,23020,23451,23521,27316,51081,51386,728689	CIRBP,DDX1,DDX3X,DDX6,DHX9,DYNC1H1,EIF5,RPSA,RPL3,RPL5,RPL6,RPL10,RPL11,RPL12,RPL24,RPL38,RPLP0,RPS10,RPS14,RPS19,RPS23,SMN1,SNRPD1,EIF3A,EIF3C,EIF3I,EIF3M,PRPF8,STRAP,CNOT1,SNRNP200,SF3B1,RPL13A,RBMX,MRPS7,EIF3L,EIF3CL
1_Member	GO Biological Processes	GO:0002181	cytoplasmic translation	-23.0652	-20.5722	26/101	1660,1981,1983,3921,6128,6132,6133,6135,6138,6139,6141,6142,6152,6165,6169,6175,6176,6228,6231,8661,8663,8668,10480,23521,51386,728689	DHX9,EIF4G1,EIF5,RPSA,RPL6,RPL8,RPL9,RPL11,RPL15,RPL17,RPL18,RPL18A,RPL24,RPL35A,RPL38,RPLP0,RPLP1,RPS23,RPS26,EIF3A,EIF3C,EIF3I,EIF3M,RPL13A,EIF3L,EIF3CL
1_Member	CORUM	CORUM:338	40S ribosomal subunit, cytoplasmic	-22.0179	-19.5377	17/31	3921,6187,6188,6189,6191,6194,6201,6202,6203,6204,6207,6208,6210,6222,6223,6228,6231	RPSA,RPS2,RPS3,RPS3A,RPS4X,RPS6,RPS7,RPS8,RPS9,RPS10,RPS13,RPS14,RPS15A,RPS18,RPS19,RPS23,RPS26
1_Member	CORUM	CORUM:305	40S ribosomal subunit, cytoplasmic	-21.3877	-18.9199	17/33	3921,6187,6188,6189,6191,6194,6201,6202,6203,6204,6207,6208,6210,6222,6223,6228,6231	RPSA,RPS2,RPS3,RPS3A,RPS4X,RPS6,RPS7,RPS8,RPS9,RPS10,RPS13,RPS14,RPS15A,RPS18,RPS19,RPS23,RPS26
1_Member	GO Biological Processes	GO:0042254	ribosome biogenesis	-13.5419	-11.2873	29/298	1654,3921,5036,5901,6122,6125,6128,6129,6130,6134,6135,6136,6152,6155,6165,6169,6175,6187,6194,6201,6202,6203,6204,6208,6223,7514,8450,10521,51081	DDX3X,RPSA,PA2G4,RAN,RPL3,RPL5,RPL6,RPL7,RPL7A,RPL10,RPL11,RPL12,RPL24,RPL27,RPL35A,RPL38,RPLP0,RPS2,RPS6,RPS7,RPS8,RPS9,RPS10,RPS14,RPS19,XPO1,CUL4B,DDX17,MRPS7
1_Member	GO Biological Processes	GO:0042255	ribosome assembly	-12.9923	-10.7872	15/63	1654,3921,6122,6125,6128,6134,6135,6136,6152,6169,6175,6204,6208,6223,51081	DDX3X,RPSA,RPL3,RPL5,RPL6,RPL10,RPL11,RPL12,RPL24,RPL38,RPLP0,RPS10,RPS14,RPS19,MRPS7
1_Member	GO Biological Processes	GO:0000027	ribosomal large subunit assembly	-9.15615	-7.20066	9/29	6122,6125,6128,6134,6135,6136,6152,6169,6175	RPL3,RPL5,RPL6,RPL10,RPL11,RPL12,RPL24,RPL38,RPLP0
1_Member	GO Biological Processes	GO:0042273	ribosomal large subunit biogenesis	-8.45475	-6.5654	12/74	6122,6125,6128,6129,6130,6134,6135,6136,6152,6165,6169,6175	RPL3,RPL5,RPL6,RPL7,RPL7A,RPL10,RPL11,RPL12,RPL24,RPL35A,RPL38,RPLP0
2_Summary	GO Biological Processes	GO:1903311	regulation of mRNA metabolic process	-25.0684	-22.5554	43/328	1153,1655,1660,1981,2521,3178,3181,3184,3190,3192,3315,3842,4670,4691,5317,5685,5690,5700,5705,5706,5707,5708,5718,5725,5976,7314,7431,7514,7534,8021,8570,9588,10197,10492,10521,23019,26058,26986,27316,54464,55802,56829,84991,293,375,3836,3837,5478,5901,5903,5905,7175,55746,1828,2810,3008,5594,6774,7531,9500,10971,1778,4173,4176,4361,9793,10726,54908,57082,121504,38,191,501,790,1738,2058,2618,302…	CIRBP,DDX5,DHX9,EIF4G1,FUS,HNRNPA1,HNRNPA2B1,HNRNPD,HNRNPK,HNRNPU,HSPB1,TNPO1,HNRNPM,NCL,PKP1,PSMA4,PSMB2,PSMC1,PSMC5,PSMC6,PSMD1,PSMD2,PSMD12,PTBP1,UPF1,UBB,VIM,XPO1,YWHAZ,NUP214,KHSRP,PRDX6,PSME3,SYNCRIP,DDX17,CNOT1,GIGYF2,PABPC1,RBMX,XRN1,DCP1A,ZC3HAV1,RBM17,SLC25A6,ARF1,KPNA1,KPNB1,PPIA,RAN,RANBP2,RANGAP1,TPR,NUP133,DSG1,SFN,H1-4,MAPK1,STAT3,YWHAE,MAGED1,YWHAQ,DYNC1H1,MCM4,MCM7,MRE11,CKAP5,NU…
2_Member	GO Biological Processes	GO:1903311	regulation of mRNA metabolic process	-25.0684	-22.5554	43/328	1153,1655,1660,1981,2521,3178,3181,3184,3190,3192,3315,3842,4670,4691,5317,5685,5690,5700,5705,5706,5707,5708,5718,5725,5976,7314,7431,7514,7534,8021,8570,9588,10197,10492,10521,23019,26058,26986,27316,54464,55802,56829,84991	CIRBP,DDX5,DHX9,EIF4G1,FUS,HNRNPA1,HNRNPA2B1,HNRNPD,HNRNPK,HNRNPU,HSPB1,TNPO1,HNRNPM,NCL,PKP1,PSMA4,PSMB2,PSMC1,PSMC5,PSMC6,PSMD1,PSMD2,PSMD12,PTBP1,UPF1,UBB,VIM,XPO1,YWHAZ,NUP214,KHSRP,PRDX6,PSME3,SYNCRIP,DDX17,CNOT1,GIGYF2,PABPC1,RBMX,XRN1,DCP1A,ZC3HAV1,RBM17
2_Member	GO Biological Processes	GO:0061013	regulation of mRNA catabolic process	-22.5153	-20.0287	33/200	1153,1660,1981,2521,3184,3192,3315,3842,4670,5317,5685,5690,5700,5705,5706,5707,5708,5718,5976,7314,7431,7514,7534,8021,8570,10197,10492,23019,26058,26986,54464,55802,56829	CIRBP,DHX9,EIF4G1,FUS,HNRNPD,HNRNPU,HSPB1,TNPO1,HNRNPM,PKP1,PSMA4,PSMB2,PSMC1,PSMC5,PSMC6,PSMD1,PSMD2,PSMD12,UPF1,UBB,VIM,XPO1,YWHAZ,NUP214,KHSRP,PSME3,SYNCRIP,CNOT1,GIGYF2,PABPC1,XRN1,DCP1A,ZC3HAV1
2_Member	GO Biological Processes	GO:0043488	regulation of mRNA stability	-20.7806	-18.3248	30/178	1153,1660,1981,2521,3184,3192,3315,3842,4670,5685,5690,5700,5705,5706,5707,5708,5718,5976,7314,7431,7514,7534,8021,8570,10197,10492,26058,26986,54464,55802	CIRBP,DHX9,EIF4G1,FUS,HNRNPD,HNRNPU,HSPB1,TNPO1,HNRNPM,PSMA4,PSMB2,PSMC1,PSMC5,PSMC6,PSMD1,PSMD2,PSMD12,UPF1,UBB,VIM,XPO1,YWHAZ,NUP214,KHSRP,PSME3,SYNCRIP,GIGYF2,PABPC1,XRN1,DCP1A
2_Member	GO Biological Processes	GO:0043487	regulation of RNA stability	-20.1399	-17.6958	30/187	1153,1660,1981,2521,3184,3192,3315,3842,4670,5685,5690,5700,5705,5706,5707,5708,5718,5976,7314,7431,7514,7534,8021,8570,10197,10492,26058,26986,54464,55802	CIRBP,DHX9,EIF4G1,FUS,HNRNPD,HNRNPU,HSPB1,TNPO1,HNRNPM,PSMA4,PSMB2,PSMC1,PSMC5,PSMC6,PSMD1,PSMD2,PSMD12,UPF1,UBB,VIM,XPO1,YWHAZ,NUP214,KHSRP,PSME3,SYNCRIP,GIGYF2,PABPC1,XRN1,DCP1A
2_Member	Reactome Gene Sets	R-HSA-450531	Regulation of mRNA stability by proteins that bind AU-rich elements	-17.9816	-15.602	21/88	1981,3184,3315,3842,5685,5690,5700,5705,5706,5707,5708,5718,7314,7514,7534,8021,8570,10197,26986,54464,55802	EIF4G1,HNRNPD,HSPB1,TNPO1,PSMA4,PSMB2,PSMC1,PSMC5,PSMC6,PSMD1,PSMD2,PSMD12,UBB,XPO1,YWHAZ,NUP214,KHSRP,PSME3,PABPC1,XRN1,DCP1A
2_Member	Reactome Gene Sets	R-HSA-162909	Host Interactions of HIV factors	-14.9834	-12.6686	22/136	293,375,3836,3837,5478,5685,5690,5700,5705,5706,5707,5708,5718,5901,5903,5905,7175,7314,7514,8021,10197,55746	SLC25A6,ARF1,KPNA1,KPNB1,PPIA,PSMA4,PSMB2,PSMC1,PSMC5,PSMC6,PSMD1,PSMD2,PSMD12,RAN,RANBP2,RANGAP1,TPR,UBB,XPO1,NUP214,PSME3,NUP133
2_Member	Reactome Gene Sets	R-HSA-109581	Apoptosis	-13.3546	-11.1095	23/180	1828,2810,3008,3836,3837,5317,5594,5685,5690,5700,5705,5706,5707,5708,5718,6774,7314,7431,7531,7534,9500,10197,10971	DSG1,SFN,H1-4,KPNA1,KPNB1,PKP1,MAPK1,PSMA4,PSMB2,PSMC1,PSMC5,PSMC6,PSMD1,PSMD2,PSMD12,STAT3,UBB,VIM,YWHAE,YWHAZ,MAGED1,PSME3,YWHAQ
2_Member	Reactome Gene Sets	R-HSA-5357801	Programmed Cell Death	-13.0961	-10.8785	23/185	1828,2810,3008,3836,3837,5317,5594,5685,5690,5700,5705,5706,5707,5708,5718,6774,7314,7431,7531,7534,9500,10197,10971	DSG1,SFN,H1-4,KPNA1,KPNB1,PKP1,MAPK1,PSMA4,PSMB2,PSMC1,PSMC5,PSMC6,PSMD1,PSMD2,PSMD12,STAT3,UBB,VIM,YWHAE,YWHAZ,MAGED1,PSME3,YWHAQ
2_Member	Reactome Gene Sets	R-HSA-450408	AUF1 (hnRNP D0) binds and destabilizes mRNA	-12.4835	-10.3197	14/56	1981,3184,3315,5685,5690,5700,5705,5706,5707,5708,5718,7314,10197,26986	EIF4G1,HNRNPD,HSPB1,PSMA4,PSMB2,PSMC1,PSMC5,PSMC6,PSMD1,PSMD2,PSMD12,UBB,PSME3,PABPC1
2_Member	Reactome Gene Sets	R-HSA-69620	Cell Cycle Checkpoints	-12.0752	-9.93797	27/293	1778,2810,4173,4176,4361,5685,5690,5700,5705,5706,5707,5708,5718,5903,5905,7314,7514,7531,7534,9793,10197,10726,10971,54908,55746,57082,121504	DYNC1H1,SFN,MCM4,MCM7,MRE11,PSMA4,PSMB2,PSMC1,PSMC5,PSMC6,PSMD1,PSMD2,PSMD12,RANBP2,RANGAP1,UBB,XPO1,YWHAE,YWHAZ,CKAP5,PSME3,NUDC,YWHAQ,SPDL1,NUP133,KNL1,H4-16
2_Member	GO Biological Processes	GO:0006520	cellular amino acid metabolic process	-11.5532	-9.45155	29/357	38,191,501,790,1738,2058,2618,3028,4522,5034,5464,5685,5690,5700,5705,5706,5707,5708,5718,5832,5917,6897,7407,8833,9255,10197,26227,51520,60496	ACAT1,AHCY,ALDH7A1,CAD,DLD,EPRS1,GART,HSD17B10,MTHFD1,P4HB,PPA1,PSMA4,PSMB2,PSMC1,PSMC5,PSMC6,PSMD1,PSMD2,PSMD12,ALDH18A1,RARS1,TARS1,VARS1,GMPS,AIMP1,PSME3,PHGDH,LARS1,AASDHPPT
2_Member	Reactome Gene Sets	R-HSA-162906	HIV Infection	-11.5133	-9.41431	24/241	293,375,2547,3836,3837,5478,5685,5690,5700,5705,5706,5707,5708,5718,5901,5903,5905,7175,7314,7514,8021,10015,10197,55746	SLC25A6,ARF1,XRCC6,KPNA1,KPNB1,PPIA,PSMA4,PSMB2,PSMC1,PSMC5,PSMC6,PSMD1,PSMD2,PSMD12,RAN,RANBP2,RANGAP1,TPR,UBB,XPO1,NUP214,PDCD6IP,PSME3,NUP133
2_Member	Reactome Gene Sets	R-HSA-1640170	Cell Cycle	-11.341	-9.24975	40/673	1778,2033,2810,3837,3842,3930,4173,4176,4361,5111,5594,5685,5690,5700,5705,5706,5707,5708,5718,5901,5903,5905,7175,7298,7314,7514,7531,7534,8021,9793,10051,10197,10592,10726,10971,54908,55746,57082,91754,121504	DYNC1H1,EP300,SFN,KPNB1,TNPO1,LBR,MCM4,MCM7,MRE11,PCNA,MAPK1,PSMA4,PSMB2,PSMC1,PSMC5,PSMC6,PSMD1,PSMD2,PSMD12,RAN,RANBP2,RANGAP1,TPR,TYMS,UBB,XPO1,YWHAE,YWHAZ,NUP214,CKAP5,SMC4,PSME3,SMC2,NUDC,YWHAQ,SPDL1,NUP133,KNL1,NEK9,H4-16
2_Member	Reactome Gene Sets	R-HSA-68886	M Phase	-11.3092	-9.22054	31/417	1778,3837,3842,3930,5594,5685,5690,5700,5705,5706,5707,5708,5718,5901,5903,5905,7175,7314,7514,7531,8021,9793,10051,10197,10592,10726,54908,55746,57082,91754,121504	DYNC1H1,KPNB1,TNPO1,LBR,MAPK1,PSMA4,PSMB2,PSMC1,PSMC5,PSMC6,PSMD1,PSMD2,PSMD12,RAN,RANBP2,RANGAP1,TPR,UBB,XPO1,YWHAE,NUP214,CKAP5,SMC4,PSME3,SMC2,NUDC,SPDL1,NUP133,KNL1,NEK9,H4-16
2_Member	Reactome Gene Sets	R-HSA-69278	Cell Cycle, Mitotic	-11.2092	-9.12813	36/560	1778,2033,3837,3842,3930,4173,4176,5111,5594,5685,5690,5700,5705,5706,5707,5708,5718,5901,5903,5905,7175,7298,7314,7514,7531,8021,9793,10051,10197,10592,10726,54908,55746,57082,91754,121504	DYNC1H1,EP300,KPNB1,TNPO1,LBR,MCM4,MCM7,PCNA,MAPK1,PSMA4,PSMB2,PSMC1,PSMC5,PSMC6,PSMD1,PSMD2,PSMD12,RAN,RANBP2,RANGAP1,TPR,TYMS,UBB,XPO1,YWHAE,NUP214,CKAP5,SMC4,PSME3,SMC2,NUDC,SPDL1,NUP133,KNL1,NEK9,H4-16
2_Member	Reactome Gene Sets	R-HSA-68882	Mitotic Anaphase	-10.9018	-8.83311	23/235	1778,3837,3842,3930,5685,5690,5700,5705,5706,5707,5708,5718,5901,5903,5905,7314,7514,9793,10197,10726,54908,55746,57082	DYNC1H1,KPNB1,TNPO1,LBR,PSMA4,PSMB2,PSMC1,PSMC5,PSMC6,PSMD1,PSMD2,PSMD12,RAN,RANBP2,RANGAP1,UBB,XPO1,CKAP5,PSME3,NUDC,SPDL1,NUP133,KNL1
2_Member	Reactome Gene Sets	R-HSA-2555396	Mitotic Metaphase and Anaphase	-10.8639	-8.79765	23/236	1778,3837,3842,3930,5685,5690,5700,5705,5706,5707,5708,5718,5901,5903,5905,7314,7514,9793,10197,10726,54908,55746,57082	DYNC1H1,KPNB1,TNPO1,LBR,PSMA4,PSMB2,PSMC1,PSMC5,PSMC6,PSMD1,PSMD2,PSMD12,RAN,RANBP2,RANGAP1,UBB,XPO1,CKAP5,PSME3,NUDC,SPDL1,NUP133,KNL1
2_Member	GO Biological Processes	GO:1901990	regulation of mitotic cell cycle phase transition	-10.4891	-8.44419	31/449	301,1642,1654,1778,1981,2033,2810,3276,4361,5111,5591,5685,5690,5700,5705,5706,5707,5708,5718,7175,7531,8450,9793,10197,11319,11331,23019,23476,26057,26058,54908	ANXA1,DDB1,DDX3X,DYNC1H1,EIF4G1,EP300,SFN,PRMT1,MRE11,PCNA,PRKDC,PSMA4,PSMB2,PSMC1,PSMC5,PSMC6,PSMD1,PSMD2,PSMD12,TPR,YWHAE,CUL4B,CKAP5,PSME3,ECD,PHB2,CNOT1,BRD4,ANKRD17,GIGYF2,SPDL1
2_Member	GO Biological Processes	GO:0002218	activation of innate immune response	-10.2948	-8.25673	26/324	1387,1654,2033,2547,3329,4057,4841,5591,5685,5690,5700,5705,5706,5707,5708,5718,6279,6280,6421,7184,7314,9958,10197,10432,26057,29110	CREBBP,DDX3X,EP300,XRCC6,HSPD1,LTF,NONO,PRKDC,PSMA4,PSMB2,PSMC1,PSMC5,PSMC6,PSMD1,PSMD2,PSMD12,S100A8,S100A9,SFPQ,HSP90B1,UBB,USP15,PSME3,RBM14,ANKRD17,TBK1
2_Member	GO Biological Processes	GO:0045089	positive regulation of innate immune response	-10.1207	-8.09609	28/382	1387,1654,1660,2033,2547,3329,4057,4841,5591,5685,5690,5700,5705,5706,5707,5708,5718,6223,6279,6280,6421,7184,7314,9958,10197,10432,26057,29110	CREBBP,DDX3X,DHX9,EP300,XRCC6,HSPD1,LTF,NONO,PRKDC,PSMA4,PSMB2,PSMC1,PSMC5,PSMC6,PSMD1,PSMD2,PSMD12,RPS19,S100A8,S100A9,SFPQ,HSP90B1,UBB,USP15,PSME3,RBM14,ANKRD17,TBK1
2_Member	GO Biological Processes	GO:0044772	mitotic cell cycle phase transition	-9.85122	-7.84387	35/595	301,1642,1654,1778,1981,2033,2810,3276,4173,4176,4361,4678,5111,5591,5685,5690,5700,5705,5706,5707,5708,5718,7175,7298,7531,8450,9793,10197,11319,11331,23019,23476,26057,26058,54908	ANXA1,DDB1,DDX3X,DYNC1H1,EIF4G1,EP300,SFN,PRMT1,MCM4,MCM7,MRE11,NASP,PCNA,PRKDC,PSMA4,PSMB2,PSMC1,PSMC5,PSMC6,PSMD1,PSMD2,PSMD12,TPR,TYMS,YWHAE,CUL4B,CKAP5,PSME3,ECD,PHB2,CNOT1,BRD4,ANKRD17,GIGYF2,SPDL1
2_Member	GO Biological Processes	GO:0043618	regulation of transcription from RNA polymerase II promoter in response to stress	-9.80624	-7.801	16/119	1387,2033,3309,3337,5685,5690,5700,5705,5706,5707,5708,5718,7314,9531,10197,10985	CREBBP,EP300,HSPA5,DNAJB1,PSMA4,PSMB2,PSMC1,PSMC5,PSMC6,PSMD1,PSMD2,PSMD12,UBB,BAG3,PSME3,GCN1
2_Member	KEGG Pathway	hsa05169	Epstein-Barr virus infection	-9.6841	-7.68306	20/201	1387,2033,3066,3315,5700,5705,5706,5707,5708,5718,5901,6774,7431,7514,7531,7534,7874,8021,10971,29110	CREBBP,EP300,HDAC2,HSPB1,PSMC1,PSMC5,PSMC6,PSMD1,PSMD2,PSMD12,RAN,STAT3,VIM,XPO1,YWHAE,YWHAZ,USP7,NUP214,YWHAQ,TBK1
2_Member	GO Biological Processes	GO:1901987	regulation of cell cycle phase transition	-9.6101	-7.61733	31/487	301,1642,1654,1778,1981,2033,2810,3276,4361,5111,5591,5685,5690,5700,5705,5706,5707,5708,5718,7175,7531,8450,9793,10197,11319,11331,23019,23476,26057,26058,54908	ANXA1,DDB1,DDX3X,DYNC1H1,EIF4G1,EP300,SFN,PRMT1,MRE11,PCNA,PRKDC,PSMA4,PSMB2,PSMC1,PSMC5,PSMC6,PSMD1,PSMD2,PSMD12,TPR,YWHAE,CUL4B,CKAP5,PSME3,ECD,PHB2,CNOT1,BRD4,ANKRD17,GIGYF2,SPDL1
2_Member	GO Biological Processes	GO:0044770	cell cycle phase transition	-9.58527	-7.59454	36/640	301,1642,1654,1778,1981,2033,2810,3276,4173,4176,4361,4678,5111,5591,5685,5690,5700,5705,5706,5707,5708,5718,5976,7175,7298,7531,8450,9793,10197,11319,11331,23019,23476,26057,26058,54908	ANXA1,DDB1,DDX3X,DYNC1H1,EIF4G1,EP300,SFN,PRMT1,MCM4,MCM7,MRE11,NASP,PCNA,PRKDC,PSMA4,PSMB2,PSMC1,PSMC5,PSMC6,PSMD1,PSMD2,PSMD12,UPF1,TPR,TYMS,YWHAE,CUL4B,CKAP5,PSME3,ECD,PHB2,CNOT1,BRD4,ANKRD17,GIGYF2,SPDL1
2_Member	GO Biological Processes	GO:0043620	regulation of DNA-templated transcription in response to stress	-9.48107	-7.49642	16/125	1387,2033,3309,3337,5685,5690,5700,5705,5706,5707,5708,5718,7314,9531,10197,10985	CREBBP,EP300,HSPA5,DNAJB1,PSMA4,PSMB2,PSMC1,PSMC5,PSMC6,PSMD1,PSMD2,PSMD12,UBB,BAG3,PSME3,GCN1
2_Member	GO Biological Processes	GO:0007346	regulation of mitotic cell cycle	-9.34108	-7.36832	38/718	301,1213,1642,1654,1778,1981,2033,2810,3192,3276,3832,4361,5111,5514,5591,5685,5690,5700,5705,5706,5707,5708,5718,7175,7531,8450,9748,9793,10015,10197,11319,11331,23019,23476,26057,26058,54908,55968	ANXA1,CLTC,DDB1,DDX3X,DYNC1H1,EIF4G1,EP300,SFN,HNRNPU,PRMT1,KIF11,MRE11,PCNA,PPP1R10,PRKDC,PSMA4,PSMB2,PSMC1,PSMC5,PSMC6,PSMD1,PSMD2,PSMD12,TPR,YWHAE,CUL4B,SLK,CKAP5,PDCD6IP,PSME3,ECD,PHB2,CNOT1,BRD4,ANKRD17,GIGYF2,SPDL1,NSFL1C
2_Member	Reactome Gene Sets	R-HSA-69481	G2/M Checkpoints	-9.29848	-7.32962	18/168	2810,4173,4176,4361,5685,5690,5700,5705,5706,5707,5708,5718,7314,7531,7534,10197,10971,121504	SFN,MCM4,MCM7,MRE11,PSMA4,PSMB2,PSMC1,PSMC5,PSMC6,PSMD1,PSMD2,PSMD12,UBB,YWHAE,YWHAZ,PSME3,YWHAQ,H4-16
2_Member	Reactome Gene Sets	R-HSA-2467813	Separation of Sister Chromatids	-9.26652	-7.2996	19/190	1778,5685,5690,5700,5705,5706,5707,5708,5718,5903,5905,7314,7514,9793,10197,10726,54908,55746,57082	DYNC1H1,PSMA4,PSMB2,PSMC1,PSMC5,PSMC6,PSMD1,PSMD2,PSMD12,RANBP2,RANGAP1,UBB,XPO1,CKAP5,PSME3,NUDC,SPDL1,NUP133,KNL1
2_Member	GO Biological Processes	GO:0010564	regulation of cell cycle process	-9.16865	-7.21127	40/795	301,1213,1642,1654,1778,1981,2033,2810,3192,3276,3832,4361,5111,5514,5591,5685,5690,5700,5705,5706,5707,5708,5718,6421,7175,7514,7531,8450,9793,10015,10197,10432,11319,11331,23019,23476,26057,26058,54908,55968	ANXA1,CLTC,DDB1,DDX3X,DYNC1H1,EIF4G1,EP300,SFN,HNRNPU,PRMT1,KIF11,MRE11,PCNA,PPP1R10,PRKDC,PSMA4,PSMB2,PSMC1,PSMC5,PSMC6,PSMD1,PSMD2,PSMD12,SFPQ,TPR,XPO1,YWHAE,CUL4B,CKAP5,PDCD6IP,PSME3,RBM14,ECD,PHB2,CNOT1,BRD4,ANKRD17,GIGYF2,SPDL1,NSFL1C
2_Member	Reactome Gene Sets	R-HSA-5358346	Hedgehog ligand biogenesis	-9.13217	-7.17855	12/65	5034,5685,5690,5700,5705,5706,5707,5708,5718,7314,7415,10197	P4HB,PSMA4,PSMB2,PSMC1,PSMC5,PSMC6,PSMD1,PSMD2,PSMD12,UBB,VCP,PSME3
2_Member	GO Biological Processes	GO:0045088	regulation of innate immune response	-9.12381	-7.17206	29/451	1387,1398,1654,1660,2033,2547,3329,4057,4841,5591,5685,5690,5700,5705,5706,5707,5708,5718,6223,6279,6280,6421,7184,7314,9958,10197,10432,26057,29110	CREBBP,CRK,DDX3X,DHX9,EP300,XRCC6,HSPD1,LTF,NONO,PRKDC,PSMA4,PSMB2,PSMC1,PSMC5,PSMC6,PSMD1,PSMD2,PSMD12,RPS19,S100A8,S100A9,SFPQ,HSP90B1,UBB,USP15,PSME3,RBM14,ANKRD17,TBK1
2_Member	Reactome Gene Sets	R-HSA-9013694	Signaling by NOTCH4	-8.98365	-7.04112	13/82	1387,2033,5685,5690,5700,5705,5706,5707,5708,5718,7314,7534,10197	CREBBP,EP300,PSMA4,PSMB2,PSMC1,PSMC5,PSMC6,PSMD1,PSMD2,PSMD12,UBB,YWHAZ,PSME3
2_Member	Reactome Gene Sets	R-HSA-9604323	Negative regulation of NOTCH4 signaling	-8.90103	-6.97109	11/54	5685,5690,5700,5705,5706,5707,5708,5718,7314,7534,10197	PSMA4,PSMB2,PSMC1,PSMC5,PSMC6,PSMD1,PSMD2,PSMD12,UBB,YWHAZ,PSME3
2_Member	Reactome Gene Sets	R-HSA-68867	Assembly of the pre-replicative complex	-8.8946	-6.96643	12/68	4173,4176,5685,5690,5700,5705,5706,5707,5708,5718,7314,10197	MCM4,MCM7,PSMA4,PSMB2,PSMC1,PSMC5,PSMC6,PSMD1,PSMD2,PSMD12,UBB,PSME3
2_Member	Reactome Gene Sets	R-HSA-8941858	Regulation of RUNX3 expression and activity	-8.81063	-6.88946	11/55	2033,5685,5690,5700,5705,5706,5707,5708,5718,7314,10197	EP300,PSMA4,PSMB2,PSMC1,PSMC5,PSMC6,PSMD1,PSMD2,PSMD12,UBB,PSME3
2_Member	Reactome Gene Sets	R-HSA-5362768	Hh mutants that don't undergo autocatalytic processing are degraded by ERAD	-8.72216	-6.80959	11/56	5685,5690,5700,5705,5706,5707,5708,5718,7314,7415,10197	PSMA4,PSMB2,PSMC1,PSMC5,PSMC6,PSMD1,PSMD2,PSMD12,UBB,VCP,PSME3
2_Member	Reactome Gene Sets	R-HSA-68949	Orc1 removal from chromatin	-8.66916	-6.75999	12/71	4173,4176,5685,5690,5700,5705,5706,5707,5708,5718,7314,10197	MCM4,MCM7,PSMA4,PSMB2,PSMC1,PSMC5,PSMC6,PSMD1,PSMD2,PSMD12,UBB,PSME3
2_Member	Reactome Gene Sets	R-HSA-4641258	Degradation of DVL	-8.63555	-6.73308	11/57	1856,5685,5690,5700,5705,5706,5707,5708,5718,7314,10197	DVL2,PSMA4,PSMB2,PSMC1,PSMC5,PSMC6,PSMD1,PSMD2,PSMD12,UBB,PSME3
2_Member	Reactome Gene Sets	R-HSA-5687128	MAPK6/MAPK4 signaling	-8.53101	-6.63351	13/89	3315,3337,5685,5690,5700,5705,5706,5707,5708,5718,7314,7514,10197	HSPB1,DNAJB1,PSMA4,PSMB2,PSMC1,PSMC5,PSMC6,PSMD1,PSMD2,PSMD12,UBB,XPO1,PSME3
2_Member	Reactome Gene Sets	R-HSA-5387390	Hh mutants abrogate ligand secretion	-8.46762	-6.57502	11/59	5685,5690,5700,5705,5706,5707,5708,5718,7314,7415,10197	PSMA4,PSMB2,PSMC1,PSMC5,PSMC6,PSMD1,PSMD2,PSMD12,UBB,VCP,PSME3
2_Member	Reactome Gene Sets	R-HSA-1234174	Cellular response to hypoxia	-8.38556	-6.50262	12/75	1387,2033,5685,5690,5700,5705,5706,5707,5708,5718,7314,10197	CREBBP,EP300,PSMA4,PSMB2,PSMC1,PSMC5,PSMC6,PSMD1,PSMD2,PSMD12,UBB,PSME3
2_Member	Reactome Gene Sets	R-HSA-4086400	PCP/CE pathway	-8.34983	-6.4732	13/92	1213,1856,5216,5685,5690,5700,5705,5706,5707,5708,5718,7314,10197	CLTC,DVL2,PFN1,PSMA4,PSMB2,PSMC1,PSMC5,PSMC6,PSMD1,PSMD2,PSMD12,UBB,PSME3
2_Member	Reactome Gene Sets	R-HSA-5678895	Defective CFTR causes cystic fibrosis	-8.30632	-6.439	11/61	5685,5690,5700,5705,5706,5707,5708,5718,7314,7415,10197	PSMA4,PSMB2,PSMC1,PSMC5,PSMC6,PSMD1,PSMD2,PSMD12,UBB,VCP,PSME3
2_Member	GO Biological Processes	GO:0061418	regulation of transcription from RNA polymerase II promoter in response to hypoxia	-8.25042	-6.38463	12/77	1387,2033,5685,5690,5700,5705,5706,5707,5708,5718,7314,10197	CREBBP,EP300,PSMA4,PSMB2,PSMC1,PSMC5,PSMC6,PSMD1,PSMD2,PSMD12,UBB,PSME3
2_Member	GO Biological Processes	GO:0062012	regulation of small molecule metabolic process	-8.11906	-6.25815	28/469	301,1213,1642,2023,2033,2171,2194,3837,4200,5223,5685,5690,5700,5705,5706,5707,5708,5718,5901,5903,6774,7175,7415,7874,8021,9611,10197,55746	ANXA1,CLTC,DDB1,ENO1,EP300,FABP5,FASN,KPNB1,ME2,PGAM1,PSMA4,PSMB2,PSMC1,PSMC5,PSMC6,PSMD1,PSMD2,PSMD12,RAN,RANBP2,STAT3,TPR,VCP,USP7,NUP214,NCOR1,PSME3,NUP133
2_Member	Reactome Gene Sets	R-HSA-4608870	Asymmetric localization of PCP proteins	-8.07576	-6.22648	11/64	1856,5685,5690,5700,5705,5706,5707,5708,5718,7314,10197	DVL2,PSMA4,PSMB2,PSMC1,PSMC5,PSMC6,PSMD1,PSMD2,PSMD12,UBB,PSME3
2_Member	Reactome Gene Sets	R-HSA-211733	Regulation of activated PAK-2p34 by proteasome mediated degradation	-8.06188	-6.21699	10/50	5685,5690,5700,5705,5706,5707,5708,5718,7314,10197	PSMA4,PSMB2,PSMC1,PSMC5,PSMC6,PSMD1,PSMD2,PSMD12,UBB,PSME3
2_Member	Reactome Gene Sets	R-HSA-180534	Vpu mediated degradation of CD4	-7.88727	-6.06785	10/52	5685,5690,5700,5705,5706,5707,5708,5718,7314,10197	PSMA4,PSMB2,PSMC1,PSMC5,PSMC6,PSMD1,PSMD2,PSMD12,UBB,PSME3
2_Member	Reactome Gene Sets	R-HSA-349425	Autodegradation of the E3 ubiquitin ligase COP1	-7.88727	-6.06785	10/52	5685,5690,5700,5705,5706,5707,5708,5718,7314,10197	PSMA4,PSMB2,PSMC1,PSMC5,PSMC6,PSMD1,PSMD2,PSMD12,UBB,PSME3
2_Member	Reactome Gene Sets	R-HSA-69601	Ubiquitin Mediated Degradation of Phosphorylated Cdc25A	-7.88727	-6.06785	10/52	5685,5690,5700,5705,5706,5707,5708,5718,7314,10197	PSMA4,PSMB2,PSMC1,PSMC5,PSMC6,PSMD1,PSMD2,PSMD12,UBB,PSME3
2_Member	Reactome Gene Sets	R-HSA-69610	p53-Independent DNA Damage Response	-7.88727	-6.06785	10/52	5685,5690,5700,5705,5706,5707,5708,5718,7314,10197	PSMA4,PSMB2,PSMC1,PSMC5,PSMC6,PSMD1,PSMD2,PSMD12,UBB,PSME3
2_Member	Reactome Gene Sets	R-HSA-69613	p53-Independent G1/S DNA damage checkpoint	-7.88727	-6.06785	10/52	5685,5690,5700,5705,5706,5707,5708,5718,7314,10197	PSMA4,PSMB2,PSMC1,PSMC5,PSMC6,PSMD1,PSMD2,PSMD12,UBB,PSME3
2_Member	Reactome Gene Sets	R-HSA-75815	Ubiquitin-dependent degradation of Cyclin D	-7.88727	-6.06785	10/52	5685,5690,5700,5705,5706,5707,5708,5718,7314,10197	PSMA4,PSMB2,PSMC1,PSMC5,PSMC6,PSMD1,PSMD2,PSMD12,UBB,PSME3
2_Member	Reactome Gene Sets	R-HSA-6807070	PTEN Regulation	-7.84919	-6.03114	15/140	1108,3066,5594,5685,5690,5700,5705,5706,5707,5708,5718,7314,7874,10197,57459	CHD4,HDAC2,MAPK1,PSMA4,PSMB2,PSMC1,PSMC5,PSMC6,PSMD1,PSMD2,PSMD12,UBB,USP7,PSME3,GATAD2B
2_Member	Reactome Gene Sets	R-HSA-169911	Regulation of Apoptosis	-7.80293	-5.98761	10/53	5685,5690,5700,5705,5706,5707,5708,5718,7314,10197	PSMA4,PSMB2,PSMC1,PSMC5,PSMC6,PSMD1,PSMD2,PSMD12,UBB,PSME3
2_Member	Reactome Gene Sets	R-HSA-5689603	UCH proteinases	-7.79327	-5.97931	13/102	3054,4738,5685,5690,5700,5705,5706,5707,5708,5718,7314,9958,10197	HCFC1,NEDD8,PSMA4,PSMB2,PSMC1,PSMC5,PSMC6,PSMD1,PSMD2,PSMD12,UBB,USP15,PSME3
2_Member	Reactome Gene Sets	R-HSA-69002	DNA Replication Pre-Initiation	-7.74877	-5.93617	12/85	4173,4176,5685,5690,5700,5705,5706,5707,5708,5718,7314,10197	MCM4,MCM7,PSMA4,PSMB2,PSMC1,PSMC5,PSMC6,PSMD1,PSMD2,PSMD12,UBB,PSME3
2_Member	Reactome Gene Sets	R-HSA-8854050	FBXL7 down-regulates AURKA during mitotic entry and in early mitosis	-7.72045	-5.91189	10/54	5685,5690,5700,5705,5706,5707,5708,5718,7314,10197	PSMA4,PSMB2,PSMC1,PSMC5,PSMC6,PSMD1,PSMD2,PSMD12,UBB,PSME3
2_Member	Reactome Gene Sets	R-HSA-174113	SCF-beta-TrCP mediated degradation of Emi1	-7.63976	-5.83785	10/55	5685,5690,5700,5705,5706,5707,5708,5718,7314,10197	PSMA4,PSMB2,PSMC1,PSMC5,PSMC6,PSMD1,PSMD2,PSMD12,UBB,PSME3
2_Member	Reactome Gene Sets	R-HSA-180585	Vif-mediated degradation of APOBEC3G	-7.63976	-5.83785	10/55	5685,5690,5700,5705,5706,5707,5708,5718,7314,10197	PSMA4,PSMB2,PSMC1,PSMC5,PSMC6,PSMD1,PSMD2,PSMD12,UBB,PSME3
2_Member	Reactome Gene Sets	R-HSA-4641257	Degradation of AXIN	-7.63976	-5.83785	10/55	5685,5690,5700,5705,5706,5707,5708,5718,7314,10197	PSMA4,PSMB2,PSMC1,PSMC5,PSMC6,PSMD1,PSMD2,PSMD12,UBB,PSME3
2_Member	GO Biological Processes	GO:0006511	ubiquitin-dependent protein catabolic process	-7.50442	-5.70645	32/631	1642,3309,4738,5094,5685,5690,5700,5705,5706,5707,5708,5718,6125,6135,6201,7184,7314,7317,7415,7874,8450,8878,9320,9958,10075,10197,10399,23607,55905,55968,57646,63893	DDB1,HSPA5,NEDD8,PCBP2,PSMA4,PSMB2,PSMC1,PSMC5,PSMC6,PSMD1,PSMD2,PSMD12,RPL5,RPL11,RPS7,HSP90B1,UBB,UBA1,VCP,USP7,CUL4B,SQSTM1,TRIP12,USP15,HUWE1,PSME3,RACK1,CD2AP,RNF114,NSFL1C,USP28,UBE2O
2_Member	Reactome Gene Sets	R-HSA-69541	Stabilization of p53	-7.48348	-5.68682	10/57	5685,5690,5700,5705,5706,5707,5708,5718,7314,10197	PSMA4,PSMB2,PSMC1,PSMC5,PSMC6,PSMD1,PSMD2,PSMD12,UBB,PSME3
2_Member	Reactome Gene Sets	R-HSA-69052	Switching of origins to a post-replicative state	-7.46298	-5.66891	12/90	4173,4176,5685,5690,5700,5705,5706,5707,5708,5718,7314,10197	MCM4,MCM7,PSMA4,PSMB2,PSMC1,PSMC5,PSMC6,PSMD1,PSMD2,PSMD12,UBB,PSME3
2_Member	Reactome Gene Sets	R-HSA-5688426	Deubiquitination	-7.46066	-5.6679	21/297	2033,3054,4738,5685,5690,5700,5705,5706,5707,5708,5718,7314,7415,7416,7417,7419,7874,9958,10197,57646,80124	EP300,HCFC1,NEDD8,PSMA4,PSMB2,PSMC1,PSMC5,PSMC6,PSMD1,PSMD2,PSMD12,UBB,VCP,VDAC1,VDAC2,VDAC3,USP7,USP15,PSME3,USP28,VCPIP1
2_Member	GO Biological Processes	GO:0019941	modification-dependent protein catabolic process	-7.40933	-5.62046	32/637	1642,3309,4738,5094,5685,5690,5700,5705,5706,5707,5708,5718,6125,6135,6201,7184,7314,7317,7415,7874,8450,8878,9320,9958,10075,10197,10399,23607,55905,55968,57646,63893	DDB1,HSPA5,NEDD8,PCBP2,PSMA4,PSMB2,PSMC1,PSMC5,PSMC6,PSMD1,PSMD2,PSMD12,RPL5,RPL11,RPS7,HSP90B1,UBB,UBA1,VCP,USP7,CUL4B,SQSTM1,TRIP12,USP15,HUWE1,PSME3,RACK1,CD2AP,RNF114,NSFL1C,USP28,UBE2O
2_Member	GO Biological Processes	GO:0002758	innate immune response-activating signal transduction	-7.3609	-5.57454	21/301	1387,1654,2033,3329,4057,5685,5690,5700,5705,5706,5707,5708,5718,6279,6280,7184,7314,9958,10197,26057,29110	CREBBP,DDX3X,EP300,HSPD1,LTF,PSMA4,PSMB2,PSMC1,PSMC5,PSMC6,PSMD1,PSMD2,PSMD12,S100A8,S100A9,HSP90B1,UBB,USP15,PSME3,ANKRD17,TBK1
2_Member	Reactome Gene Sets	R-HSA-69206	G1/S Transition	-7.35192	-5.56684	14/131	4173,4176,5111,5685,5690,5700,5705,5706,5707,5708,5718,7298,7314,10197	MCM4,MCM7,PCNA,PSMA4,PSMB2,PSMC1,PSMC5,PSMC6,PSMD1,PSMD2,PSMD12,TYMS,UBB,PSME3
2_Member	Reactome Gene Sets	R-HSA-5676590	NIK-->noncanonical NF-kB signaling	-7.33356	-5.55101	10/59	5685,5690,5700,5705,5706,5707,5708,5718,7314,10197	PSMA4,PSMB2,PSMC1,PSMC5,PSMC6,PSMD1,PSMD2,PSMD12,UBB,PSME3
2_Member	Reactome Gene Sets	R-HSA-68827	CDT1 association with the CDC6:ORC:origin complex	-7.33356	-5.55101	10/59	5685,5690,5700,5705,5706,5707,5708,5718,7314,10197	PSMA4,PSMB2,PSMC1,PSMC5,PSMC6,PSMD1,PSMD2,PSMD12,UBB,PSME3
2_Member	KEGG Pathway	hsa03050	Proteasome	-7.31201	-5.53073	9/45	5685,5690,5700,5705,5706,5707,5708,5718,10197	PSMA4,PSMB2,PSMC1,PSMC5,PSMC6,PSMD1,PSMD2,PSMD12,PSME3
2_Member	GO Biological Processes	GO:1901991	negative regulation of mitotic cell cycle phase transition	-7.29986	-5.51983	19/250	2033,2810,3276,4361,5111,5591,5685,5690,5700,5705,5706,5707,5708,5718,7175,10197,23019,26058,54908	EP300,SFN,PRMT1,MRE11,PCNA,PRKDC,PSMA4,PSMB2,PSMC1,PSMC5,PSMC6,PSMD1,PSMD2,PSMD12,TPR,PSME3,CNOT1,GIGYF2,SPDL1
2_Member	Reactome Gene Sets	R-HSA-187577	SCF(Skp2)-mediated degradation of p27/p21	-7.26084	-5.48828	10/60	5685,5690,5700,5705,5706,5707,5708,5718,7314,10197	PSMA4,PSMB2,PSMC1,PSMC5,PSMC6,PSMD1,PSMD2,PSMD12,UBB,PSME3
2_Member	Reactome Gene Sets	R-HSA-5607761	Dectin-1 mediated noncanonical NF-kB signaling	-7.26084	-5.48828	10/60	5685,5690,5700,5705,5706,5707,5708,5718,7314,10197	PSMA4,PSMB2,PSMC1,PSMC5,PSMC6,PSMD1,PSMD2,PSMD12,UBB,PSME3
2_Member	Reactome Gene Sets	R-HSA-5610780	Degradation of GLI1 by the proteasome	-7.26084	-5.48828	10/60	5685,5690,5700,5705,5706,5707,5708,5718,7314,10197	PSMA4,PSMB2,PSMC1,PSMC5,PSMC6,PSMD1,PSMD2,PSMD12,UBB,PSME3
2_Member	Reactome Gene Sets	R-HSA-5610783	Degradation of GLI2 by the proteasome	-7.26084	-5.48828	10/60	5685,5690,5700,5705,5706,5707,5708,5718,7314,10197	PSMA4,PSMB2,PSMC1,PSMC5,PSMC6,PSMD1,PSMD2,PSMD12,UBB,PSME3
2_Member	Reactome Gene Sets	R-HSA-5610785	GLI3 is processed to GLI3R by the proteasome	-7.26084	-5.48828	10/60	5685,5690,5700,5705,5706,5707,5708,5718,7314,10197	PSMA4,PSMB2,PSMC1,PSMC5,PSMC6,PSMD1,PSMD2,PSMD12,UBB,PSME3
2_Member	GO Biological Processes	GO:0044257	cellular protein catabolic process	-7.2551	-5.48377	36/786	1213,1642,3309,4738,5094,5685,5690,5700,5705,5706,5707,5708,5718,6125,6135,6201,7184,7314,7317,7415,7430,7874,7879,8450,8878,9320,9958,10015,10075,10197,10399,23607,55905,55968,57646,63893	CLTC,DDB1,HSPA5,NEDD8,PCBP2,PSMA4,PSMB2,PSMC1,PSMC5,PSMC6,PSMD1,PSMD2,PSMD12,RPL5,RPL11,RPS7,HSP90B1,UBB,UBA1,VCP,EZR,USP7,RAB7A,CUL4B,SQSTM1,TRIP12,USP15,PDCD6IP,HUWE1,PSME3,RACK1,CD2AP,RNF114,NSFL1C,USP28,UBE2O
2_Member	GO Biological Processes	GO:0043632	modification-dependent macromolecule catabolic process	-7.23836	-5.46826	32/648	1642,3309,4738,5094,5685,5690,5700,5705,5706,5707,5708,5718,6125,6135,6201,7184,7314,7317,7415,7874,8450,8878,9320,9958,10075,10197,10399,23607,55905,55968,57646,63893	DDB1,HSPA5,NEDD8,PCBP2,PSMA4,PSMB2,PSMC1,PSMC5,PSMC6,PSMD1,PSMD2,PSMD12,RPL5,RPL11,RPS7,HSP90B1,UBB,UBA1,VCP,USP7,CUL4B,SQSTM1,TRIP12,USP15,HUWE1,PSME3,RACK1,CD2AP,RNF114,NSFL1C,USP28,UBE2O
2_Member	GO Biological Processes	GO:0031349	positive regulation of defense response	-7.21883	-5.44995	28/517	1387,1654,1660,2033,2547,3329,4057,4841,5591,5685,5690,5700,5705,5706,5707,5708,5718,6223,6279,6280,6421,7184,7314,9958,10197,10432,26057,29110	CREBBP,DDX3X,DHX9,EP300,XRCC6,HSPD1,LTF,NONO,PRKDC,PSMA4,PSMB2,PSMC1,PSMC5,PSMC6,PSMD1,PSMD2,PSMD12,RPS19,S100A8,S100A9,SFPQ,HSP90B1,UBB,USP15,PSME3,RBM14,ANKRD17,TBK1
2_Member	Reactome Gene Sets	R-HSA-5619084	ABC transporter disorders	-7.20671	-5.43905	11/77	5685,5690,5700,5705,5706,5707,5708,5718,7314,7415,10197	PSMA4,PSMB2,PSMC1,PSMC5,PSMC6,PSMD1,PSMD2,PSMD12,UBB,VCP,PSME3
2_Member	GO Biological Processes	GO:0070482	response to oxygen levels	-7.201	-5.43456	24/394	81,191,1387,2023,2033,3066,3329,3939,5034,5315,5685,5690,5700,5705,5706,5707,5708,5718,7184,7314,9131,9520,10197,11331	ACTN4,AHCY,CREBBP,ENO1,EP300,HDAC2,HSPD1,LDHA,P4HB,PKM,PSMA4,PSMB2,PSMC1,PSMC5,PSMC6,PSMD1,PSMD2,PSMD12,HSP90B1,UBB,AIFM1,NPEPPS,PSME3,PHB2
2_Member	Reactome Gene Sets	R-HSA-8878159	Transcriptional regulation by RUNX3	-7.09324	-5.33762	12/97	1387,2033,5685,5690,5700,5705,5706,5707,5708,5718,7314,10197	CREBBP,EP300,PSMA4,PSMB2,PSMC1,PSMC5,PSMC6,PSMD1,PSMD2,PSMD12,UBB,PSME3
2_Member	GO Biological Processes	GO:0036293	response to decreased oxygen levels	-7.08333	-5.32889	23/370	81,191,1387,2023,2033,3329,3939,5034,5315,5685,5690,5700,5705,5706,5707,5708,5718,7184,7314,9131,9520,10197,11331	ACTN4,AHCY,CREBBP,ENO1,EP300,HSPD1,LDHA,P4HB,PKM,PSMA4,PSMB2,PSMC1,PSMC5,PSMC6,PSMD1,PSMD2,PSMD12,HSP90B1,UBB,AIFM1,NPEPPS,PSME3,PHB2
2_Member	Reactome Gene Sets	R-HSA-174084	Autodegradation of Cdh1 by Cdh1:APC/C	-7.051	-5.29892	10/63	5685,5690,5700,5705,5706,5707,5708,5718,7314,10197	PSMA4,PSMB2,PSMC1,PSMC5,PSMC6,PSMD1,PSMD2,PSMD12,UBB,PSME3
2_Member	Reactome Gene Sets	R-HSA-69239	Synthesis of DNA	-6.98293	-5.24017	13/119	4173,4176,5111,5685,5690,5700,5705,5706,5707,5708,5718,7314,10197	MCM4,MCM7,PCNA,PSMA4,PSMB2,PSMC1,PSMC5,PSMC6,PSMD1,PSMD2,PSMD12,UBB,PSME3
2_Member	CORUM	CORUM:193	PA700-20S-PA28 complex	-6.94025	-5.20435	8/36	5685,5690,5700,5705,5706,5707,5708,5718	PSMA4,PSMB2,PSMC1,PSMC5,PSMC6,PSMD1,PSMD2,PSMD12
2_Member	Reactome Gene Sets	R-HSA-1236978	Cross-presentation of soluble exogenous antigens (endosomes)	-6.8927	-5.15906	9/50	5685,5690,5700,5705,5706,5707,5708,5718,10197	PSMA4,PSMB2,PSMC1,PSMC5,PSMC6,PSMD1,PSMD2,PSMD12,PSME3
2_Member	Reactome Gene Sets	R-HSA-1168372	Downstream signaling events of B Cell Receptor (BCR)	-6.86261	-5.13009	11/83	5478,5685,5690,5700,5705,5706,5707,5708,5718,7314,10197	PPIA,PSMA4,PSMB2,PSMC1,PSMC5,PSMC6,PSMD1,PSMD2,PSMD12,UBB,PSME3
2_Member	Reactome Gene Sets	R-HSA-1234176	Oxygen-dependent proline hydroxylation of Hypoxia-inducible Factor Alpha	-6.85268	-5.12352	10/66	5685,5690,5700,5705,5706,5707,5708,5718,7314,10197	PSMA4,PSMB2,PSMC1,PSMC5,PSMC6,PSMD1,PSMD2,PSMD12,UBB,PSME3
2_Member	Reactome Gene Sets	R-HSA-69563	p53-Dependent G1 DNA Damage Response	-6.85268	-5.12352	10/66	5685,5690,5700,5705,5706,5707,5708,5718,7314,10197	PSMA4,PSMB2,PSMC1,PSMC5,PSMC6,PSMD1,PSMD2,PSMD12,UBB,PSME3
2_Member	Reactome Gene Sets	R-HSA-69580	p53-Dependent G1/S DNA damage checkpoint	-6.85268	-5.12352	10/66	5685,5690,5700,5705,5706,5707,5708,5718,7314,10197	PSMA4,PSMB2,PSMC1,PSMC5,PSMC6,PSMD1,PSMD2,PSMD12,UBB,PSME3
2_Member	Reactome Gene Sets	R-HSA-350562	Regulation of ornithine decarboxylase (ODC)	-6.81479	-5.09118	9/51	5685,5690,5700,5705,5706,5707,5708,5718,10197	PSMA4,PSMB2,PSMC1,PSMC5,PSMC6,PSMD1,PSMD2,PSMD12,PSME3
2_Member	GO Biological Processes	GO:1901988	negative regulation of cell cycle phase transition	-6.79917	-5.07666	19/269	2033,2810,3276,4361,5111,5591,5685,5690,5700,5705,5706,5707,5708,5718,7175,10197,23019,26058,54908	EP300,SFN,PRMT1,MRE11,PCNA,PRKDC,PSMA4,PSMB2,PSMC1,PSMC5,PSMC6,PSMD1,PSMD2,PSMD12,TPR,PSME3,CNOT1,GIGYF2,SPDL1
2_Member	Reactome Gene Sets	R-HSA-1169091	Activation of NF-kappaB in B cells	-6.78894	-5.06971	10/67	5685,5690,5700,5705,5706,5707,5708,5718,7314,10197	PSMA4,PSMB2,PSMC1,PSMC5,PSMC6,PSMD1,PSMD2,PSMD12,UBB,PSME3
2_Member	Reactome Gene Sets	R-HSA-174154	APC/C:Cdc20 mediated degradation of Securin	-6.78894	-5.06971	10/67	5685,5690,5700,5705,5706,5707,5708,5718,7314,10197	PSMA4,PSMB2,PSMC1,PSMC5,PSMC6,PSMD1,PSMD2,PSMD12,UBB,PSME3
2_Member	GO Biological Processes	GO:0036294	cellular response to decreased oxygen levels	-6.75405	-5.037	17/218	1387,2023,2033,5034,5685,5690,5700,5705,5706,5707,5708,5718,7314,9131,9520,10197,11331	CREBBP,ENO1,EP300,P4HB,PSMA4,PSMB2,PSMC1,PSMC5,PSMC6,PSMD1,PSMD2,PSMD12,UBB,AIFM1,NPEPPS,PSME3,PHB2
2_Member	Reactome Gene Sets	R-HSA-5658442	Regulation of RAS by GAPs	-6.72631	-5.01251	10/68	5685,5690,5700,5705,5706,5707,5708,5718,7314,10197	PSMA4,PSMB2,PSMC1,PSMC5,PSMC6,PSMD1,PSMD2,PSMD12,UBB,PSME3
2_Member	Reactome Gene Sets	R-HSA-69615	G1/S DNA Damage Checkpoints	-6.72631	-5.01251	10/68	5685,5690,5700,5705,5706,5707,5708,5718,7314,10197	PSMA4,PSMB2,PSMC1,PSMC5,PSMC6,PSMD1,PSMD2,PSMD12,UBB,PSME3
2_Member	GO Biological Processes	GO:0001666	response to hypoxia	-6.7145	-5.00177	22/358	81,191,1387,2023,2033,3329,3939,5034,5315,5685,5690,5700,5705,5706,5707,5708,5718,7184,7314,9520,10197,11331	ACTN4,AHCY,CREBBP,ENO1,EP300,HSPD1,LDHA,P4HB,PKM,PSMA4,PSMB2,PSMC1,PSMC5,PSMC6,PSMD1,PSMD2,PSMD12,HSP90B1,UBB,NPEPPS,PSME3,PHB2
2_Member	Reactome Gene Sets	R-HSA-8948751	Regulation of PTEN stability and activity	-6.66477	-4.95505	10/69	5685,5690,5700,5705,5706,5707,5708,5718,7314,10197	PSMA4,PSMB2,PSMC1,PSMC5,PSMC6,PSMD1,PSMD2,PSMD12,UBB,PSME3
2_Member	Reactome Gene Sets	R-HSA-69306	DNA Replication	-6.64871	-4.94094	13/127	4173,4176,5111,5685,5690,5700,5705,5706,5707,5708,5718,7314,10197	MCM4,MCM7,PCNA,PSMA4,PSMB2,PSMC1,PSMC5,PSMC6,PSMD1,PSMD2,PSMD12,UBB,PSME3
2_Member	Reactome Gene Sets	R-HSA-453279	Mitotic G1 phase and G1/S transition	-6.64832	-4.94094	14/149	4173,4176,5111,5685,5690,5700,5705,5706,5707,5708,5718,7298,7314,10197	MCM4,MCM7,PCNA,PSMA4,PSMB2,PSMC1,PSMC5,PSMC6,PSMD1,PSMD2,PSMD12,TYMS,UBB,PSME3
2_Member	GO Biological Processes	GO:0051603	proteolysis involved in cellular protein catabolic process	-6.57509	-4.87089	33/729	1642,3309,4738,5094,5685,5690,5700,5705,5706,5707,5708,5718,6125,6135,6201,7184,7314,7317,7415,7874,8450,8878,9320,9958,10015,10075,10197,10399,23607,55905,55968,57646,63893	DDB1,HSPA5,NEDD8,PCBP2,PSMA4,PSMB2,PSMC1,PSMC5,PSMC6,PSMD1,PSMD2,PSMD12,RPL5,RPL11,RPS7,HSP90B1,UBB,UBA1,VCP,USP7,CUL4B,SQSTM1,TRIP12,USP15,PDCD6IP,HUWE1,PSME3,RACK1,CD2AP,RNF114,NSFL1C,USP28,UBE2O
2_Member	GO Biological Processes	GO:0060071	Wnt signaling pathway, planar cell polarity pathway	-6.57259	-4.86944	12/108	1213,1856,5216,5685,5690,5700,5705,5706,5707,5708,5718,10197	CLTC,DVL2,PFN1,PSMA4,PSMB2,PSMC1,PSMC5,PSMC6,PSMD1,PSMD2,PSMD12,PSME3
2_Member	Reactome Gene Sets	R-HSA-5619115	Disorders of transmembrane transporters	-6.55644	-4.85538	15/175	5685,5690,5700,5705,5706,5707,5708,5718,5903,7175,7314,7415,8021,10197,55746	PSMA4,PSMB2,PSMC1,PSMC5,PSMC6,PSMD1,PSMD2,PSMD12,RANBP2,TPR,UBB,VCP,NUP214,PSME3,NUP133
2_Member	GO Biological Processes	GO:0002253	activation of immune response	-6.5482	-4.84819	33/731	1387,1398,1399,1654,2033,2547,3329,4057,4841,5245,5591,5594,5685,5690,5700,5705,5706,5707,5708,5718,6188,6279,6280,6421,7184,7314,7430,9958,10197,10432,11331,26057,29110	CREBBP,CRK,CRKL,DDX3X,EP300,XRCC6,HSPD1,LTF,NONO,PHB,PRKDC,MAPK1,PSMA4,PSMB2,PSMC1,PSMC5,PSMC6,PSMD1,PSMD2,PSMD12,RPS3,S100A8,S100A9,SFPQ,HSP90B1,UBB,EZR,USP15,PSME3,RBM14,PHB2,ANKRD17,TBK1
2_Member	GO Biological Processes	GO:1902036	regulation of hematopoietic stem cell differentiation	-6.48631	-4.79149	10/72	3313,5685,5690,5700,5705,5706,5707,5708,5718,10197	HSPA9,PSMA4,PSMB2,PSMC1,PSMC5,PSMC6,PSMD1,PSMD2,PSMD12,PSME3
2_Member	Reactome Gene Sets	R-HSA-174178	APC/C:Cdh1 mediated degradation of Cdc20 and other APC/C:Cdh1 targeted proteins in late mitosis/earl	-6.48631	-4.79149	10/72	5685,5690,5700,5705,5706,5707,5708,5718,7314,10197	PSMA4,PSMB2,PSMC1,PSMC5,PSMC6,PSMD1,PSMD2,PSMD12,UBB,PSME3
2_Member	Reactome Gene Sets	R-HSA-174184	Cdc20:Phospho-APC/C mediated degradation of Cyclin A	-6.48631	-4.79149	10/72	5685,5690,5700,5705,5706,5707,5708,5718,7314,10197	PSMA4,PSMB2,PSMC1,PSMC5,PSMC6,PSMD1,PSMD2,PSMD12,UBB,PSME3
2_Member	Reactome Gene Sets	R-HSA-69017	CDK-mediated phosphorylation and removal of Cdc6	-6.48631	-4.79149	10/72	5685,5690,5700,5705,5706,5707,5708,5718,7314,10197	PSMA4,PSMB2,PSMC1,PSMC5,PSMC6,PSMD1,PSMD2,PSMD12,UBB,PSME3
2_Member	GO Biological Processes	GO:0090175	regulation of establishment of planar polarity	-6.48481	-4.79102	12/110	1213,1856,5216,5685,5690,5700,5705,5706,5707,5708,5718,10197	CLTC,DVL2,PFN1,PSMA4,PSMB2,PSMC1,PSMC5,PSMC6,PSMD1,PSMD2,PSMD12,PSME3
2_Member	Reactome Gene Sets	R-HSA-179419	APC:Cdc20 mediated degradation of cell cycle proteins prior to satisfation of the cell cycle checkpo	-6.42878	-4.74213	10/73	5685,5690,5700,5705,5706,5707,5708,5718,7314,10197	PSMA4,PSMB2,PSMC1,PSMC5,PSMC6,PSMD1,PSMD2,PSMD12,UBB,PSME3
2_Member	Reactome Gene Sets	R-HSA-8939902	Regulation of RUNX2 expression and activity	-6.42878	-4.74213	10/73	5685,5690,5700,5705,5706,5707,5708,5718,7314,10197	PSMA4,PSMB2,PSMC1,PSMC5,PSMC6,PSMD1,PSMD2,PSMD12,UBB,PSME3
2_Member	Reactome Gene Sets	R-HSA-5663202	Diseases of signal transduction by growth factor receptors and second messengers	-6.37074	-4.68712	22/375	1387,2033,3066,5245,5594,5685,5690,5700,5705,5706,5707,5708,5718,6774,7094,7314,7414,7415,9611,10197,55750,56829	CREBBP,EP300,HDAC2,PHB,MAPK1,PSMA4,PSMB2,PSMC1,PSMC5,PSMC6,PSMD1,PSMD2,PSMD12,STAT3,TLN1,UBB,VCL,VCP,NCOR1,PSME3,AGK,ZC3HAV1
2_Member	Reactome Gene Sets	R-HSA-201681	TCF dependent signaling in response to WNT	-6.34344	-4.66082	17/233	1387,1856,2033,5685,5690,5700,5705,5706,5707,5708,5718,7314,7514,7534,10197,57680,121504	CREBBP,DVL2,EP300,PSMA4,PSMB2,PSMC1,PSMC5,PSMC6,PSMD1,PSMD2,PSMD12,UBB,XPO1,YWHAZ,PSME3,CHD8,H4-16
2_Member	Reactome Gene Sets	R-HSA-176409	APC/C:Cdc20 mediated degradation of mitotic proteins	-6.31648	-4.63686	10/75	5685,5690,5700,5705,5706,5707,5708,5718,7314,10197	PSMA4,PSMB2,PSMC1,PSMC5,PSMC6,PSMD1,PSMD2,PSMD12,UBB,PSME3
2_Member	GO Biological Processes	GO:0071456	cellular response to hypoxia	-6.31196	-4.63433	16/208	1387,2023,2033,5034,5685,5690,5700,5705,5706,5707,5708,5718,7314,9520,10197,11331	CREBBP,ENO1,EP300,P4HB,PSMA4,PSMB2,PSMC1,PSMC5,PSMC6,PSMD1,PSMD2,PSMD12,UBB,NPEPPS,PSME3,PHB2
2_Member	GO Biological Processes	GO:0071453	cellular response to oxygen levels	-6.29127	-4.62053	17/235	1387,2023,2033,5034,5685,5690,5700,5705,5706,5707,5708,5718,7314,9131,9520,10197,11331	CREBBP,ENO1,EP300,P4HB,PSMA4,PSMB2,PSMC1,PSMC5,PSMC6,PSMD1,PSMD2,PSMD12,UBB,AIFM1,NPEPPS,PSME3,PHB2
2_Member	Reactome Gene Sets	R-HSA-157118	Signaling by NOTCH	-6.2654	-4.59745	17/236	1387,2033,3066,5685,5690,5700,5705,5706,5707,5708,5718,7314,7534,9611,10197,113878,121504	CREBBP,EP300,HDAC2,PSMA4,PSMB2,PSMC1,PSMC5,PSMC6,PSMD1,PSMD2,PSMD12,UBB,YWHAZ,NCOR1,PSME3,DTX2,H4-16
2_Member	Reactome Gene Sets	R-HSA-176814	Activation of APC/C and APC/C:Cdc20 mediated degradation of mitotic proteins	-6.26166	-4.5948	10/76	5685,5690,5700,5705,5706,5707,5708,5718,7314,10197	PSMA4,PSMB2,PSMC1,PSMC5,PSMC6,PSMD1,PSMD2,PSMD12,UBB,PSME3
2_Member	Reactome Gene Sets	R-HSA-351202	Metabolism of polyamines	-6.25005	-4.58416	9/59	5685,5690,5700,5705,5706,5707,5708,5718,10197	PSMA4,PSMB2,PSMC1,PSMC5,PSMC6,PSMD1,PSMD2,PSMD12,PSME3
2_Member	Reactome Gene Sets	R-HSA-8852276	The role of GTSE1 in G2/M progression after G2 checkpoint	-6.20769	-4.54468	10/77	5685,5690,5700,5705,5706,5707,5708,5718,7314,10197	PSMA4,PSMB2,PSMC1,PSMC5,PSMC6,PSMD1,PSMD2,PSMD12,UBB,PSME3
2_Member	GO Biological Processes	GO:0038061	NIK/NF-kappaB signaling	-6.18563	-4.52549	15/187	81,1654,2033,5052,5685,5690,5700,5705,5706,5707,5708,5718,6188,7430,10197	ACTN4,DDX3X,EP300,PRDX1,PSMA4,PSMB2,PSMC1,PSMC5,PSMC6,PSMD1,PSMD2,PSMD12,RPS3,EZR,PSME3
2_Member	CORUM	CORUM:32	PA700 complex	-6.17376	-4.51552	6/20	5700,5705,5706,5707,5708,5718	PSMC1,PSMC5,PSMC6,PSMD1,PSMD2,PSMD12
2_Member	Reactome Gene Sets	R-HSA-446652	Interleukin-1 family signaling	-6.15709	-4.4998	13/140	5685,5690,5700,5705,5706,5707,5708,5718,6774,7314,8878,10197,29110	PSMA4,PSMB2,PSMC1,PSMC5,PSMC6,PSMD1,PSMD2,PSMD12,STAT3,UBB,SQSTM1,PSME3,TBK1
2_Member	GO Biological Processes	GO:0010948	negative regulation of cell cycle process	-6.12632	-4.46997	21/357	2033,2810,3276,4361,5111,5514,5591,5685,5690,5700,5705,5706,5707,5708,5718,7175,10197,10432,23019,26058,54908	EP300,SFN,PRMT1,MRE11,PCNA,PPP1R10,PRKDC,PSMA4,PSMB2,PSMC1,PSMC5,PSMC6,PSMD1,PSMD2,PSMD12,TPR,PSME3,RBM14,CNOT1,GIGYF2,SPDL1
2_Member	GO Biological Processes	GO:2000736	regulation of stem cell differentiation	-6.11246	-4.45706	12/119	3192,3313,5685,5690,5700,5705,5706,5707,5708,5718,6774,10197	HNRNPU,HSPA9,PSMA4,PSMB2,PSMC1,PSMC5,PSMC6,PSMD1,PSMD2,PSMD12,STAT3,PSME3
2_Member	GO Biological Processes	GO:0070646	protein modification by small protein removal	-6.07444	-4.42279	19/300	2033,2873,3054,4738,5685,5690,5700,5705,5706,5707,5708,5718,7314,7415,7874,9958,10197,57646,80124	EP300,GPS1,HCFC1,NEDD8,PSMA4,PSMB2,PSMC1,PSMC5,PSMC6,PSMD1,PSMD2,PSMD12,UBB,VCP,USP7,USP15,PSME3,USP28,VCPIP1
2_Member	Reactome Gene Sets	R-HSA-176408	Regulation of APC/C activators between G1/S and early anaphase	-6.05068	-4.40182	10/80	5685,5690,5700,5705,5706,5707,5708,5718,7314,10197	PSMA4,PSMB2,PSMC1,PSMC5,PSMC6,PSMD1,PSMD2,PSMD12,UBB,PSME3
2_Member	Reactome Gene Sets	R-HSA-8878166	Transcriptional regulation by RUNX2	-6.03438	-4.38678	12/121	5594,5685,5690,5700,5705,5706,5707,5708,5718,7314,10197,10432	MAPK1,PSMA4,PSMB2,PSMC1,PSMC5,PSMC6,PSMD1,PSMD2,PSMD12,UBB,PSME3,RBM14
2_Member	GO Biological Processes	GO:0070498	interleukin-1-mediated signaling pathway	-6.0297	-4.38362	11/100	5685,5690,5700,5705,5706,5707,5708,5718,7314,8878,10197	PSMA4,PSMB2,PSMC1,PSMC5,PSMC6,PSMD1,PSMD2,PSMD12,UBB,SQSTM1,PSME3
2_Member	GO Biological Processes	GO:0006521	regulation of cellular amino acid metabolic process	-6.00068	-4.35657	9/63	5685,5690,5700,5705,5706,5707,5708,5718,10197	PSMA4,PSMB2,PSMC1,PSMC5,PSMC6,PSMD1,PSMD2,PSMD12,PSME3
2_Member	GO Biological Processes	GO:0031145	anaphase-promoting complex-dependent catabolic process	-5.9999	-4.35657	10/81	5685,5690,5700,5705,5706,5707,5708,5718,7314,10197	PSMA4,PSMB2,PSMC1,PSMC5,PSMC6,PSMD1,PSMD2,PSMD12,UBB,PSME3
2_Member	GO Biological Processes	GO:0033238	regulation of cellular amine metabolic process	-5.9999	-4.35657	10/81	3251,5685,5690,5700,5705,5706,5707,5708,5718,10197	HPRT1,PSMA4,PSMB2,PSMC1,PSMC5,PSMC6,PSMD1,PSMD2,PSMD12,PSME3
2_Member	Reactome Gene Sets	R-HSA-5689880	Ub-specific processing proteases	-5.9869	-4.34552	16/220	5685,5690,5700,5705,5706,5707,5708,5718,7314,7416,7417,7419,7874,9958,10197,57646	PSMA4,PSMB2,PSMC1,PSMC5,PSMC6,PSMD1,PSMD2,PSMD12,UBB,VDAC1,VDAC2,VDAC3,USP7,USP15,PSME3,USP28
2_Member	GO Biological Processes	GO:0001738	morphogenesis of a polarized epithelium	-5.98279	-4.34312	13/145	1213,1856,5216,5685,5690,5700,5705,5706,5707,5708,5718,7430,10197	CLTC,DVL2,PFN1,PSMA4,PSMB2,PSMC1,PSMC5,PSMC6,PSMD1,PSMD2,PSMD12,EZR,PSME3
2_Member	Reactome Gene Sets	R-HSA-2871837	FCERI mediated NF-kB activation	-5.94986	-4.312	10/82	5685,5690,5700,5705,5706,5707,5708,5718,7314,10197	PSMA4,PSMB2,PSMC1,PSMC5,PSMC6,PSMD1,PSMD2,PSMD12,UBB,PSME3
2_Member	Reactome Gene Sets	R-HSA-3858494	Beta-catenin independent WNT signaling	-5.94883	-4.31187	13/146	1213,1856,5216,5685,5690,5700,5705,5706,5707,5708,5718,7314,10197	CLTC,DVL2,PFN1,PSMA4,PSMB2,PSMC1,PSMC5,PSMC6,PSMD1,PSMD2,PSMD12,UBB,PSME3
2_Member	Reactome Gene Sets	R-HSA-69275	G2/M Transition	-5.92678	-4.29162	15/196	1778,2033,5685,5690,5700,5705,5706,5707,5708,5718,7314,7514,7531,9793,10197	DYNC1H1,EP300,PSMA4,PSMB2,PSMC1,PSMC5,PSMC6,PSMD1,PSMD2,PSMD12,UBB,XPO1,YWHAE,CKAP5,PSME3
2_Member	GO Biological Processes	GO:0001736	establishment of planar polarity	-5.92016	-4.28679	12/124	1213,1856,5216,5685,5690,5700,5705,5706,5707,5708,5718,10197	CLTC,DVL2,PFN1,PSMA4,PSMB2,PSMC1,PSMC5,PSMC6,PSMD1,PSMD2,PSMD12,PSME3
2_Member	GO Biological Processes	GO:0007164	establishment of tissue polarity	-5.92016	-4.28679	12/124	1213,1856,5216,5685,5690,5700,5705,5706,5707,5708,5718,10197	CLTC,DVL2,PFN1,PSMA4,PSMB2,PSMC1,PSMC5,PSMC6,PSMD1,PSMD2,PSMD12,PSME3
2_Member	Reactome Gene Sets	R-HSA-195253	Degradation of beta-catenin by the destruction complex	-5.90055	-4.27332	10/83	5685,5690,5700,5705,5706,5707,5708,5718,7314,10197	PSMA4,PSMB2,PSMC1,PSMC5,PSMC6,PSMD1,PSMD2,PSMD12,UBB,PSME3
2_Member	Reactome Gene Sets	R-HSA-69202	Cyclin E associated events during G1/S transition	-5.90055	-4.27332	10/83	5685,5690,5700,5705,5706,5707,5708,5718,7314,10197	PSMA4,PSMB2,PSMC1,PSMC5,PSMC6,PSMD1,PSMD2,PSMD12,UBB,PSME3
2_Member	Reactome Gene Sets	R-HSA-382556	ABC-family proteins mediated transport	-5.90046	-4.27332	11/103	5685,5690,5700,5705,5706,5707,5708,5718,7314,7415,10197	PSMA4,PSMB2,PSMC1,PSMC5,PSMC6,PSMD1,PSMD2,PSMD12,UBB,VCP,PSME3
2_Member	Reactome Gene Sets	R-HSA-9020702	Interleukin-1 signaling	-5.90046	-4.27332	11/103	5685,5690,5700,5705,5706,5707,5708,5718,7314,8878,10197	PSMA4,PSMB2,PSMC1,PSMC5,PSMC6,PSMD1,PSMD2,PSMD12,UBB,SQSTM1,PSME3
2_Member	Reactome Gene Sets	R-HSA-453274	Mitotic G2-G2/M phases	-5.87131	-4.24681	15/198	1778,2033,5685,5690,5700,5705,5706,5707,5708,5718,7314,7514,7531,9793,10197	DYNC1H1,EP300,PSMA4,PSMB2,PSMC1,PSMC5,PSMC6,PSMD1,PSMD2,PSMD12,UBB,XPO1,YWHAE,CKAP5,PSME3
2_Member	GO Biological Processes	GO:0045930	negative regulation of mitotic cell cycle	-5.86242	-4.2388	20/340	2033,2810,3276,4361,5111,5514,5591,5685,5690,5700,5705,5706,5707,5708,5718,7175,10197,23019,26058,54908	EP300,SFN,PRMT1,MRE11,PCNA,PPP1R10,PRKDC,PSMA4,PSMB2,PSMC1,PSMC5,PSMC6,PSMD1,PSMD2,PSMD12,TPR,PSME3,CNOT1,GIGYF2,SPDL1
2_Member	GO Biological Processes	GO:0060218	hematopoietic stem cell differentiation	-5.85194	-4.2299	10/84	3313,5685,5690,5700,5705,5706,5707,5708,5718,10197	HSPA9,PSMA4,PSMB2,PSMC1,PSMC5,PSMC6,PSMD1,PSMD2,PSMD12,PSME3
2_Member	GO Biological Processes	GO:1901532	regulation of hematopoietic progenitor cell differentiation	-5.80403	-4.19079	10/85	3313,5685,5690,5700,5705,5706,5707,5708,5718,10197	HSPA9,PSMA4,PSMB2,PSMC1,PSMC5,PSMC6,PSMD1,PSMD2,PSMD12,PSME3
2_Member	Reactome Gene Sets	R-HSA-1236974	ER-Phagosome pathway	-5.80403	-4.19079	10/85	5685,5690,5700,5705,5706,5707,5708,5718,7314,10197	PSMA4,PSMB2,PSMC1,PSMC5,PSMC6,PSMD1,PSMD2,PSMD12,UBB,PSME3
2_Member	Reactome Gene Sets	R-HSA-5632684	Hedgehog 'on' state	-5.80403	-4.19079	10/85	5685,5690,5700,5705,5706,5707,5708,5718,7314,10197	PSMA4,PSMB2,PSMC1,PSMC5,PSMC6,PSMD1,PSMD2,PSMD12,UBB,PSME3
2_Member	Reactome Gene Sets	R-HSA-69656	Cyclin A:Cdk2-associated events at S phase entry	-5.80403	-4.19079	10/85	5685,5690,5700,5705,5706,5707,5708,5718,7314,10197	PSMA4,PSMB2,PSMC1,PSMC5,PSMC6,PSMD1,PSMD2,PSMD12,UBB,PSME3
2_Member	GO Biological Processes	GO:0002478	antigen processing and presentation of exogenous peptide antigen	-5.79916	-4.18677	14/175	375,1213,1778,3832,5685,5690,5700,5705,5706,5707,5708,5718,7879,10197	ARF1,CLTC,DYNC1H1,KIF11,PSMA4,PSMB2,PSMC1,PSMC5,PSMC6,PSMD1,PSMD2,PSMD12,RAB7A,PSME3
2_Member	GO Biological Processes	GO:0016579	protein deubiquitination	-5.79042	-4.17889	18/284	2033,3054,4738,5685,5690,5700,5705,5706,5707,5708,5718,7314,7415,7874,9958,10197,57646,80124	EP300,HCFC1,NEDD8,PSMA4,PSMB2,PSMC1,PSMC5,PSMC6,PSMD1,PSMD2,PSMD12,UBB,VCP,USP7,USP15,PSME3,USP28,VCPIP1
2_Member	Reactome Gene Sets	R-HSA-174143	APC/C-mediated degradation of cell cycle proteins	-5.75679	-4.14949	10/86	5685,5690,5700,5705,5706,5707,5708,5718,7314,10197	PSMA4,PSMB2,PSMC1,PSMC5,PSMC6,PSMD1,PSMD2,PSMD12,UBB,PSME3
2_Member	Reactome Gene Sets	R-HSA-453276	Regulation of mitotic cell cycle	-5.75679	-4.14949	10/86	5685,5690,5700,5705,5706,5707,5708,5718,7314,10197	PSMA4,PSMB2,PSMC1,PSMC5,PSMC6,PSMD1,PSMD2,PSMD12,UBB,PSME3
2_Member	GO Biological Processes	GO:1905330	regulation of morphogenesis of an epithelium	-5.62563	-4.02085	14/181	1213,1856,5216,5685,5690,5700,5705,5706,5707,5708,5718,9500,10197,11331	CLTC,DVL2,PFN1,PSMA4,PSMB2,PSMC1,PSMC5,PSMC6,PSMD1,PSMD2,PSMD12,MAGED1,PSME3,PHB2
2_Member	GO Biological Processes	GO:0019884	antigen processing and presentation of exogenous antigen	-5.59742	-3.99431	14/182	375,1213,1778,3832,5685,5690,5700,5705,5706,5707,5708,5718,7879,10197	ARF1,CLTC,DYNC1H1,KIF11,PSMA4,PSMB2,PSMC1,PSMC5,PSMC6,PSMD1,PSMD2,PSMD12,RAB7A,PSME3
2_Member	Reactome Gene Sets	R-HSA-983705	Signaling by the B Cell Receptor (BCR)	-5.53863	-3.94298	11/112	5478,5685,5690,5700,5705,5706,5707,5708,5718,7314,10197	PPIA,PSMA4,PSMB2,PSMC1,PSMC5,PSMC6,PSMD1,PSMD2,PSMD12,UBB,PSME3
2_Member	GO Biological Processes	GO:0002223	stimulatory C-type lectin receptor signaling pathway	-5.50063	-3.90743	11/113	1387,2033,5685,5690,5700,5705,5706,5707,5708,5718,10197	CREBBP,EP300,PSMA4,PSMB2,PSMC1,PSMC5,PSMC6,PSMD1,PSMD2,PSMD12,PSME3
2_Member	Reactome Gene Sets	R-HSA-69242	S Phase	-5.4718	-3.88024	13/161	4173,4176,5111,5685,5690,5700,5705,5706,5707,5708,5718,7314,10197	MCM4,MCM7,PCNA,PSMA4,PSMB2,PSMC1,PSMC5,PSMC6,PSMD1,PSMD2,PSMD12,UBB,PSME3
2_Member	Reactome Gene Sets	R-HSA-195721	Signaling by WNT	-5.42488	-3.83817	19/332	1213,1387,1856,2033,5216,5685,5690,5700,5705,5706,5707,5708,5718,7314,7514,7534,10197,57680,121504	CLTC,CREBBP,DVL2,EP300,PFN1,PSMA4,PSMB2,PSMC1,PSMC5,PSMC6,PSMD1,PSMD2,PSMD12,UBB,XPO1,YWHAZ,PSME3,CHD8,H4-16
2_Member	GO Biological Processes	GO:0002220	innate immune response activating cell surface receptor signaling pathway	-5.38905	-3.80474	11/116	1387,2033,5685,5690,5700,5705,5706,5707,5708,5718,10197	CREBBP,EP300,PSMA4,PSMB2,PSMC1,PSMC5,PSMC6,PSMD1,PSMD2,PSMD12,PSME3
2_Member	GO Biological Processes	GO:0010972	negative regulation of G2/M transition of mitotic cell cycle	-5.35931	-3.77978	10/95	4361,5685,5690,5700,5705,5706,5707,5708,5718,10197	MRE11,PSMA4,PSMB2,PSMC1,PSMC5,PSMC6,PSMD1,PSMD2,PSMD12,PSME3
2_Member	GO Biological Processes	GO:0031146	SCF-dependent proteasomal ubiquitin-dependent protein catabolic process	-5.35931	-3.77978	10/95	5685,5690,5700,5705,5706,5707,5708,5718,8450,10197	PSMA4,PSMB2,PSMC1,PSMC5,PSMC6,PSMD1,PSMD2,PSMD12,CUL4B,PSME3
2_Member	GO Biological Processes	GO:0002479	antigen processing and presentation of exogenous peptide antigen via MHC class I, TAP-dependent	-5.35258	-3.77463	9/75	5685,5690,5700,5705,5706,5707,5708,5718,10197	PSMA4,PSMB2,PSMC1,PSMC5,PSMC6,PSMD1,PSMD2,PSMD12,PSME3
2_Member	Reactome Gene Sets	R-HSA-5621481	C-type lectin receptors (CLRs)	-5.2682	-3.69806	12/143	1387,2033,5685,5690,5700,5705,5706,5707,5708,5718,7314,10197	CREBBP,EP300,PSMA4,PSMB2,PSMC1,PSMC5,PSMC6,PSMD1,PSMD2,PSMD12,UBB,PSME3
2_Member	GO Biological Processes	GO:0048002	antigen processing and presentation of peptide antigen	-5.24786	-3.68329	14/195	375,1213,1778,3832,5685,5690,5700,5705,5706,5707,5708,5718,7879,10197	ARF1,CLTC,DYNC1H1,KIF11,PSMA4,PSMB2,PSMC1,PSMC5,PSMC6,PSMD1,PSMD2,PSMD12,RAB7A,PSME3
2_Member	Reactome Gene Sets	R-HSA-202424	Downstream TCR signaling	-5.23685	-3.67438	10/98	5685,5690,5700,5705,5706,5707,5708,5718,7314,10197	PSMA4,PSMB2,PSMC1,PSMC5,PSMC6,PSMD1,PSMD2,PSMD12,UBB,PSME3
2_Member	GO Biological Processes	GO:0042590	antigen processing and presentation of exogenous peptide antigen via MHC class I	-5.16363	-3.6057	9/79	5685,5690,5700,5705,5706,5707,5708,5718,10197	PSMA4,PSMB2,PSMC1,PSMC5,PSMC6,PSMD1,PSMD2,PSMD12,PSME3
2_Member	GO Biological Processes	GO:0010389	regulation of G2/M transition of mitotic cell cycle	-5.14632	-3.58914	14/199	1778,4361,5685,5690,5700,5705,5706,5707,5708,5718,7531,9793,10197,23476	DYNC1H1,MRE11,PSMA4,PSMB2,PSMC1,PSMC5,PSMC6,PSMD1,PSMD2,PSMD12,YWHAE,CKAP5,PSME3,BRD4
2_Member	Reactome Gene Sets	R-HSA-1236975	Antigen processing-Cross presentation	-5.11886	-3.56393	10/101	5685,5690,5700,5705,5706,5707,5708,5718,7314,10197	PSMA4,PSMB2,PSMC1,PSMC5,PSMC6,PSMD1,PSMD2,PSMD12,UBB,PSME3
2_Member	Reactome Gene Sets	R-HSA-5607764	CLEC7A (Dectin-1) signaling	-5.11886	-3.56393	10/101	5685,5690,5700,5705,5706,5707,5708,5718,7314,10197	PSMA4,PSMB2,PSMC1,PSMC5,PSMC6,PSMD1,PSMD2,PSMD12,UBB,PSME3
2_Member	GO Biological Processes	GO:0090263	positive regulation of canonical Wnt signaling pathway	-5.11444	-3.56026	12/148	1654,3728,5685,5690,5700,5705,5706,5707,5708,5718,7415,10197	DDX3X,JUP,PSMA4,PSMB2,PSMC1,PSMC5,PSMC6,PSMD1,PSMD2,PSMD12,VCP,PSME3
2_Member	Reactome Gene Sets	R-HSA-5358351	Signaling by Hedgehog	-5.08447	-3.53252	12/149	5034,5685,5690,5700,5705,5706,5707,5708,5718,7314,7415,10197	P4HB,PSMA4,PSMB2,PSMC1,PSMC5,PSMC6,PSMD1,PSMD2,PSMD12,UBB,VCP,PSME3
2_Member	Reactome Gene Sets	R-HSA-5668541	TNFR2 non-canonical NF-kB pathway	-5.08048	-3.52927	10/102	5685,5690,5700,5705,5706,5707,5708,5718,7314,10197	PSMA4,PSMB2,PSMC1,PSMC5,PSMC6,PSMD1,PSMD2,PSMD12,UBB,PSME3
2_Member	GO Biological Processes	GO:0035567	non-canonical Wnt signaling pathway	-5.0253	-3.47924	12/151	1213,1856,5216,5685,5690,5700,5705,5706,5707,5708,5718,10197	CLTC,DVL2,PFN1,PSMA4,PSMB2,PSMC1,PSMC5,PSMC6,PSMD1,PSMD2,PSMD12,PSME3
2_Member	Reactome Gene Sets	R-HSA-5683057	MAPK family signaling cascades	-4.99315	-3.45075	17/293	3315,3337,5245,5594,5685,5690,5700,5705,5706,5707,5708,5718,7094,7314,7414,7514,10197	HSPB1,DNAJB1,PHB,MAPK1,PSMA4,PSMB2,PSMC1,PSMC5,PSMC6,PSMD1,PSMD2,PSMD12,TLN1,UBB,VCL,XPO1,PSME3
2_Member	Reactome Gene Sets	R-HSA-8951664	Neddylation	-4.98231	-3.44135	15/234	1642,2873,4738,5685,5690,5700,5705,5706,5707,5708,5718,7314,8450,10197,55832	DDB1,GPS1,NEDD8,PSMA4,PSMB2,PSMC1,PSMC5,PSMC6,PSMD1,PSMD2,PSMD12,UBB,CUL4B,PSME3,CAND1
2_Member	GO Biological Processes	GO:0043161	proteasome-mediated ubiquitin-dependent protein catabolic process	-4.97498	-3.43475	21/423	1642,3309,5094,5685,5690,5700,5705,5706,5707,5708,5718,6135,7184,7314,7415,7874,8450,10197,10399,23607,55968	DDB1,HSPA5,PCBP2,PSMA4,PSMB2,PSMC1,PSMC5,PSMC6,PSMD1,PSMD2,PSMD12,RPL11,HSP90B1,UBB,VCP,USP7,CUL4B,PSME3,RACK1,CD2AP,NSFL1C
2_Member	GO Biological Processes	GO:0042176	regulation of protein catabolic process	-4.96926	-3.42986	20/390	1642,2316,5245,5700,5707,5708,6125,6135,6201,6642,7314,7415,7430,7514,7874,7879,8450,10197,10399,25976	DDB1,FLNA,PHB,PSMC1,PSMD1,PSMD2,RPL5,RPL11,RPS7,SNX1,UBB,VCP,EZR,XPO1,USP7,RAB7A,CUL4B,PSME3,RACK1,TIPARP
2_Member	GO Biological Processes	GO:0071347	cellular response to interleukin-1	-4.94261	-3.40598	13/180	5685,5690,5700,5705,5706,5707,5708,5718,5976,7314,8878,10197,27316	PSMA4,PSMB2,PSMC1,PSMC5,PSMC6,PSMD1,PSMD2,PSMD12,UPF1,UBB,SQSTM1,PSME3,RBMX
2_Member	GO Biological Processes	GO:0070555	response to interleukin-1	-4.92727	-3.39207	14/208	301,5685,5690,5700,5705,5706,5707,5708,5718,5976,7314,8878,10197,27316	ANXA1,PSMA4,PSMB2,PSMC1,PSMC5,PSMC6,PSMD1,PSMD2,PSMD12,UPF1,UBB,SQSTM1,PSME3,RBMX
2_Member	GO Biological Processes	GO:0044106	cellular amine metabolic process	-4.91174	-3.37939	11/130	501,3251,5685,5690,5700,5705,5706,5707,5708,5718,10197	ALDH7A1,HPRT1,PSMA4,PSMB2,PSMC1,PSMC5,PSMC6,PSMD1,PSMD2,PSMD12,PSME3
2_Member	Reactome Gene Sets	R-HSA-8939236	RUNX1 regulates transcription of genes involved in differentiation of HSCs	-4.91174	-3.37939	11/130	5685,5690,5700,5705,5706,5707,5708,5718,7314,10197,121504	PSMA4,PSMB2,PSMC1,PSMC5,PSMC6,PSMD1,PSMD2,PSMD12,UBB,PSME3,H4-16
2_Member	GO Biological Processes	GO:1902750	negative regulation of cell cycle G2/M phase transition	-4.89524	-3.36501	10/107	4361,5685,5690,5700,5705,5706,5707,5708,5718,10197	MRE11,PSMA4,PSMB2,PSMC1,PSMC5,PSMC6,PSMD1,PSMD2,PSMD12,PSME3
2_Member	Reactome Gene Sets	R-HSA-8878171	Transcriptional regulation by RUNX1	-4.87312	-3.3457	15/239	1387,2033,3276,5685,5690,5700,5705,5706,5707,5708,5718,7314,10197,23309,121504	CREBBP,EP300,PRMT1,PSMA4,PSMB2,PSMC1,PSMC5,PSMC6,PSMD1,PSMD2,PSMD12,UBB,PSME3,SIN3B,H4-16
2_Member	Reactome Gene Sets	R-HSA-2454202	Fc epsilon receptor (FCERI) signaling	-4.78703	-3.27138	11/134	5594,5685,5690,5700,5705,5706,5707,5708,5718,7314,10197	MAPK1,PSMA4,PSMB2,PSMC1,PSMC5,PSMC6,PSMD1,PSMD2,PSMD12,UBB,PSME3
2_Member	GO Biological Processes	GO:1902749	regulation of cell cycle G2/M phase transition	-4.74277	-3.22849	14/216	1778,4361,5685,5690,5700,5705,5706,5707,5708,5718,7531,9793,10197,23476	DYNC1H1,MRE11,PSMA4,PSMB2,PSMC1,PSMC5,PSMC6,PSMD1,PSMD2,PSMD12,YWHAE,CKAP5,PSME3,BRD4
2_Member	Reactome Gene Sets	R-HSA-5610787	Hedgehog 'off' state	-4.68654	-3.17767	10/113	5685,5690,5700,5705,5706,5707,5708,5718,7314,10197	PSMA4,PSMB2,PSMC1,PSMC5,PSMC6,PSMD1,PSMD2,PSMD12,UBB,PSME3
2_Member	GO Biological Processes	GO:0009308	amine metabolic process	-4.63755	-3.13336	11/139	501,3251,5685,5690,5700,5705,5706,5707,5708,5718,10197	ALDH7A1,HPRT1,PSMA4,PSMB2,PSMC1,PSMC5,PSMC6,PSMD1,PSMD2,PSMD12,PSME3
2_Member	CORUM	CORUM:181	26S proteasome	-4.57536	-3.07777	5/22	5685,5690,5700,5705,5706	PSMA4,PSMB2,PSMC1,PSMC5,PSMC6
2_Member	GO Biological Processes	GO:0002244	hematopoietic progenitor cell differentiation	-4.55949	-3.06562	12/168	3313,5591,5685,5690,5700,5705,5706,5707,5708,5718,10197,23215	HSPA9,PRKDC,PSMA4,PSMB2,PSMC1,PSMC5,PSMC6,PSMD1,PSMD2,PSMD12,PSME3,PRRC2C
2_Member	Reactome Gene Sets	R-HSA-202403	TCR signaling	-4.45977	-2.97888	10/120	5685,5690,5700,5705,5706,5707,5708,5718,7314,10197	PSMA4,PSMB2,PSMC1,PSMC5,PSMC6,PSMD1,PSMD2,PSMD12,UBB,PSME3
2_Member	GO Biological Processes	GO:0050852	T cell receptor signaling pathway	-4.41349	-2.93512	13/202	1399,5594,5685,5690,5700,5705,5706,5707,5708,5718,6188,7430,10197	CRKL,MAPK1,PSMA4,PSMB2,PSMC1,PSMC5,PSMC6,PSMD1,PSMD2,PSMD12,RPS3,EZR,PSME3
2_Member	GO Biological Processes	GO:0002757	immune response-activating signal transduction	-4.40236	-2.92524	26/647	1387,1398,1399,1654,2033,3329,4057,5594,5685,5690,5700,5705,5706,5707,5708,5718,6188,6279,6280,7184,7314,7430,9958,10197,26057,29110	CREBBP,CRK,CRKL,DDX3X,EP300,HSPD1,LTF,MAPK1,PSMA4,PSMB2,PSMC1,PSMC5,PSMC6,PSMD1,PSMD2,PSMD12,RPS3,S100A8,S100A9,HSP90B1,UBB,EZR,USP15,PSME3,ANKRD17,TBK1
2_Member	GO Biological Processes	GO:0019882	antigen processing and presentation	-4.37932	-2.90345	14/233	375,1213,1778,3832,5685,5690,5700,5705,5706,5707,5708,5718,7879,10197	ARF1,CLTC,DYNC1H1,KIF11,PSMA4,PSMB2,PSMC1,PSMC5,PSMC6,PSMD1,PSMD2,PSMD12,RAB7A,PSME3
2_Member	Reactome Gene Sets	R-HSA-1257604	PIP3 activates AKT signaling	-4.37008	-2.89483	15/264	1108,3066,5594,5685,5690,5700,5705,5706,5707,5708,5718,7314,7874,10197,57459	CHD4,HDAC2,MAPK1,PSMA4,PSMB2,PSMC1,PSMC5,PSMC6,PSMD1,PSMD2,PSMD12,UBB,USP7,PSME3,GATAD2B
2_Member	GO Biological Processes	GO:0043687	post-translational protein modification	-4.32471	-2.86414	18/364	1642,2873,4738,5034,5685,5690,5700,5705,5706,5707,5708,5718,7184,8450,10130,10197,26100,55832	DDB1,GPS1,NEDD8,P4HB,PSMA4,PSMB2,PSMC1,PSMC5,PSMC6,PSMD1,PSMD2,PSMD12,HSP90B1,CUL4B,PDIA6,PSME3,WIPI2,CAND1
2_Member	GO Biological Processes	GO:0002474	antigen processing and presentation of peptide antigen via MHC class I	-4.29753	-2.84175	9/101	5685,5690,5700,5705,5706,5707,5708,5718,10197	PSMA4,PSMB2,PSMC1,PSMC5,PSMC6,PSMD1,PSMD2,PSMD12,PSME3
2_Member	GO Biological Processes	GO:0030177	positive regulation of Wnt signaling pathway	-4.21939	-2.7701	12/182	1654,3728,5685,5690,5700,5705,5706,5707,5708,5718,7415,10197	DDX3X,JUP,PSMA4,PSMB2,PSMC1,PSMC5,PSMC6,PSMD1,PSMD2,PSMD12,VCP,PSME3
2_Member	Reactome Gene Sets	R-HSA-9006925	Intracellular signaling by second messengers	-4.19012	-2.74375	16/306	1108,3066,3838,5594,5685,5690,5700,5705,5706,5707,5708,5718,7314,7874,10197,57459	CHD4,HDAC2,KPNA2,MAPK1,PSMA4,PSMB2,PSMC1,PSMC5,PSMC6,PSMD1,PSMD2,PSMD12,UBB,USP7,PSME3,GATAD2B
2_Member	GO Biological Processes	GO:0010565	regulation of cellular ketone metabolic process	-4.1736	-2.73071	12/184	301,2171,5685,5690,5700,5705,5706,5707,5708,5718,9611,10197	ANXA1,FABP5,PSMA4,PSMB2,PSMC1,PSMC5,PSMC6,PSMD1,PSMD2,PSMD12,NCOR1,PSME3
2_Member	GO Biological Processes	GO:0010498	proteasomal protein catabolic process	-4.17272	-2.73041	21/480	1642,3309,5094,5685,5690,5700,5705,5706,5707,5708,5718,6135,7184,7314,7415,7874,8450,10197,10399,23607,55968	DDB1,HSPA5,PCBP2,PSMA4,PSMB2,PSMC1,PSMC5,PSMC6,PSMD1,PSMD2,PSMD12,RPL11,HSP90B1,UBB,VCP,USP7,CUL4B,PSME3,RACK1,CD2AP,NSFL1C
2_Member	GO Biological Processes	GO:0090090	negative regulation of canonical Wnt signaling pathway	-4.15095	-2.71094	12/185	1500,1856,5685,5690,5700,5705,5706,5707,5708,5718,10197,57680	CTNND1,DVL2,PSMA4,PSMB2,PSMC1,PSMC5,PSMC6,PSMD1,PSMD2,PSMD12,PSME3,CHD8
2_Member	Reactome Gene Sets	R-HSA-983168	Antigen processing: Ubiquitination & Proteasome degradation	-4.1403	-2.70086	16/309	5685,5690,5700,5705,5706,5707,5708,5718,7314,7317,9320,9520,10075,10197,55905,63893	PSMA4,PSMB2,PSMC1,PSMC5,PSMC6,PSMD1,PSMD2,PSMD12,UBB,UBA1,TRIP12,NPEPPS,HUWE1,PSME3,RNF114,UBE2O
2_Member	GO Biological Processes	GO:0045786	negative regulation of cell cycle	-4.09127	-2.65753	25/637	1982,2033,2810,3276,3843,4361,5111,5514,5591,5685,5690,5700,5705,5706,5707,5708,5718,7175,10197,10432,23019,26058,54908,57646,261726	EIF4G2,EP300,SFN,PRMT1,IPO5,MRE11,PCNA,PPP1R10,PRKDC,PSMA4,PSMB2,PSMC1,PSMC5,PSMC6,PSMD1,PSMD2,PSMD12,TPR,PSME3,RBM14,CNOT1,GIGYF2,SPDL1,USP28,TIPRL
2_Member	Reactome Gene Sets	R-HSA-5673001	RAF/MAP kinase cascade	-4.08724	-2.65406	14/248	5245,5594,5685,5690,5700,5705,5706,5707,5708,5718,7094,7314,7414,10197	PHB,MAPK1,PSMA4,PSMB2,PSMC1,PSMC5,PSMC6,PSMD1,PSMD2,PSMD12,TLN1,UBB,VCL,PSME3
2_Member	GO Biological Processes	GO:0002764	immune response-regulating signaling pathway	-4.03842	-2.61804	26/681	1387,1398,1399,1654,2033,3329,4057,5594,5685,5690,5700,5705,5706,5707,5708,5718,6188,6279,6280,7184,7314,7430,9958,10197,26057,29110	CREBBP,CRK,CRKL,DDX3X,EP300,HSPD1,LTF,MAPK1,PSMA4,PSMB2,PSMC1,PSMC5,PSMC6,PSMD1,PSMD2,PSMD12,RPS3,S100A8,S100A9,HSP90B1,UBB,EZR,USP15,PSME3,ANKRD17,TBK1
2_Member	GO Biological Processes	GO:0030178	negative regulation of Wnt signaling pathway	-4.03438	-2.61455	13/220	1500,1856,5685,5690,5700,5705,5706,5707,5708,5718,10197,10399,57680	CTNND1,DVL2,PSMA4,PSMB2,PSMC1,PSMC5,PSMC6,PSMD1,PSMD2,PSMD12,PSME3,RACK1,CHD8
2_Member	GO Biological Processes	GO:0000086	G2/M transition of mitotic cell cycle	-4.01343	-2.59523	14/252	1778,4361,5685,5690,5700,5705,5706,5707,5708,5718,7531,9793,10197,23476	DYNC1H1,MRE11,PSMA4,PSMB2,PSMC1,PSMC5,PSMC6,PSMD1,PSMD2,PSMD12,YWHAE,CKAP5,PSME3,BRD4
2_Member	Reactome Gene Sets	R-HSA-5684996	MAPK1/MAPK3 signaling	-3.97713	-2.56165	14/254	5245,5594,5685,5690,5700,5705,5706,5707,5708,5718,7094,7314,7414,10197	PHB,MAPK1,PSMA4,PSMB2,PSMC1,PSMC5,PSMC6,PSMD1,PSMD2,PSMD12,TLN1,UBB,VCL,PSME3
2_Member	GO Biological Processes	GO:0000209	protein polyubiquitination	-3.96338	-2.55028	16/320	1654,5685,5690,5700,5705,5706,5707,5708,5718,7314,9320,9520,10075,10197,55905,63893	DDX3X,PSMA4,PSMB2,PSMC1,PSMC5,PSMC6,PSMD1,PSMD2,PSMD12,UBB,TRIP12,NPEPPS,HUWE1,PSME3,RNF114,UBE2O
2_Member	GO Biological Processes	GO:2000027	regulation of animal organ morphogenesis	-3.95912	-2.54689	14/255	1213,1856,5216,5685,5690,5700,5705,5706,5707,5708,5718,9500,10197,11331	CLTC,DVL2,PFN1,PSMA4,PSMB2,PSMC1,PSMC5,PSMC6,PSMD1,PSMD2,PSMD12,MAGED1,PSME3,PHB2
2_Member	GO Biological Processes	GO:0048863	stem cell differentiation	-3.9057	-2.49776	14/258	1072,3192,3313,5594,5685,5690,5700,5705,5706,5707,5708,5718,6774,10197	CFL1,HNRNPU,HSPA9,MAPK1,PSMA4,PSMB2,PSMC1,PSMC5,PSMC6,PSMD1,PSMD2,PSMD12,STAT3,PSME3
2_Member	GO Biological Processes	GO:0033209	tumor necrosis factor-mediated signaling pathway	-3.86542	-2.45907	11/169	81,5685,5690,5700,5705,5706,5707,5708,5718,10197,10399	ACTN4,PSMA4,PSMB2,PSMC1,PSMC5,PSMC6,PSMD1,PSMD2,PSMD12,PSME3,RACK1
2_Member	GO Biological Processes	GO:0071356	cellular response to tumor necrosis factor	-3.86317	-2.45735	15/293	81,1660,5594,5685,5690,5700,5705,5706,5707,5708,5718,6188,10197,10399,10594	ACTN4,DHX9,MAPK1,PSMA4,PSMB2,PSMC1,PSMC5,PSMC6,PSMD1,PSMD2,PSMD12,RPS3,PSME3,RACK1,PRPF8
2_Member	GO Biological Processes	GO:0060828	regulation of canonical Wnt signaling pathway	-3.84696	-2.44273	15/294	1500,1654,1856,3728,5685,5690,5700,5705,5706,5707,5708,5718,7415,10197,57680	CTNND1,DDX3X,DVL2,JUP,PSMA4,PSMB2,PSMC1,PSMC5,PSMC6,PSMD1,PSMD2,PSMD12,VCP,PSME3,CHD8
2_Member	GO Biological Processes	GO:0002009	morphogenesis of an epithelium	-3.77141	-2.37191	22/551	760,1072,1213,1856,2316,4522,5216,5685,5690,5700,5705,5706,5707,5708,5718,6201,7053,7414,7430,9500,10197,11331	CA2,CFL1,CLTC,DVL2,FLNA,MTHFD1,PFN1,PSMA4,PSMB2,PSMC1,PSMC5,PSMC6,PSMD1,PSMD2,PSMD12,RPS7,TGM3,VCL,EZR,MAGED1,PSME3,PHB2
2_Member	Reactome Gene Sets	R-HSA-9607240	FLT3 Signaling	-3.76741	-2.36947	14/266	5245,5594,5685,5690,5700,5705,5706,5707,5708,5718,7094,7314,7414,10197	PHB,MAPK1,PSMA4,PSMB2,PSMC1,PSMC5,PSMC6,PSMD1,PSMD2,PSMD12,TLN1,UBB,VCL,PSME3
2_Member	Reactome Gene Sets	R-HSA-983169	Class I MHC mediated antigen processing & presentation	-3.69219	-2.30148	17/373	3309,5685,5690,5700,5705,5706,5707,5708,5718,7314,7317,9320,9520,10075,10197,55905,63893	HSPA5,PSMA4,PSMB2,PSMC1,PSMC5,PSMC6,PSMD1,PSMD2,PSMD12,UBB,UBA1,TRIP12,NPEPPS,HUWE1,PSME3,RNF114,UBE2O
2_Member	GO Biological Processes	GO:0044839	cell cycle G2/M phase transition	-3.68392	-2.29523	14/271	1778,4361,5685,5690,5700,5705,5706,5707,5708,5718,7531,9793,10197,23476	DYNC1H1,MRE11,PSMA4,PSMB2,PSMC1,PSMC5,PSMC6,PSMD1,PSMD2,PSMD12,YWHAE,CKAP5,PSME3,BRD4
2_Member	GO Biological Processes	GO:0016055	Wnt signaling pathway	-3.63601	-2.2509	21/525	1213,1500,1642,1654,1856,3728,5216,5685,5690,5700,5705,5706,5707,5708,5718,7314,7415,10009,10197,10399,57680	CLTC,CTNND1,DDB1,DDX3X,DVL2,JUP,PFN1,PSMA4,PSMB2,PSMC1,PSMC5,PSMC6,PSMD1,PSMD2,PSMD12,UBB,VCP,ZBTB33,PSME3,RACK1,CHD8
2_Member	GO Biological Processes	GO:0198738	cell-cell signaling by wnt	-3.61387	-2.23077	21/527	1213,1500,1642,1654,1856,3728,5216,5685,5690,5700,5705,5706,5707,5708,5718,7314,7415,10009,10197,10399,57680	CLTC,CTNND1,DDB1,DDX3X,DVL2,JUP,PFN1,PSMA4,PSMB2,PSMC1,PSMC5,PSMC6,PSMD1,PSMD2,PSMD12,UBB,VCP,ZBTB33,PSME3,RACK1,CHD8
2_Member	GO Biological Processes	GO:0034612	response to tumor necrosis factor	-3.52402	-2.15137	15/315	81,1660,5594,5685,5690,5700,5705,5706,5707,5708,5718,6188,10197,10399,10594	ACTN4,DHX9,MAPK1,PSMA4,PSMB2,PSMC1,PSMC5,PSMC6,PSMD1,PSMD2,PSMD12,RPS3,PSME3,RACK1,PRPF8
2_Member	GO Biological Processes	GO:0042180	cellular ketone metabolic process	-3.45514	-2.08979	13/252	301,2171,5685,5690,5700,5705,5706,5707,5708,5718,7167,9611,10197	ANXA1,FABP5,PSMA4,PSMB2,PSMC1,PSMC5,PSMC6,PSMD1,PSMD2,PSMD12,TPI1,NCOR1,PSME3
2_Member	GO Biological Processes	GO:0038095	Fc-epsilon receptor signaling pathway	-3.2366	-1.89931	10/169	5594,5685,5690,5700,5705,5706,5707,5708,5718,10197	MAPK1,PSMA4,PSMB2,PSMC1,PSMC5,PSMC6,PSMD1,PSMD2,PSMD12,PSME3
2_Member	GO Biological Processes	GO:1903706	regulation of hemopoiesis	-3.21208	-1.87705	19/487	301,760,1387,2033,3276,3313,4057,4830,5685,5690,5700,5705,5706,5707,5708,5718,6774,10197,121504	ANXA1,CA2,CREBBP,EP300,PRMT1,HSPA9,LTF,NME1,PSMA4,PSMB2,PSMC1,PSMC5,PSMC6,PSMD1,PSMD2,PSMD12,STAT3,PSME3,H4-16
2_Member	GO Biological Processes	GO:0030111	regulation of Wnt signaling pathway	-3.18433	-1.85244	16/376	1500,1654,1856,3728,5685,5690,5700,5705,5706,5707,5708,5718,7415,10197,10399,57680	CTNND1,DDX3X,DVL2,JUP,PSMA4,PSMB2,PSMC1,PSMC5,PSMC6,PSMD1,PSMD2,PSMD12,VCP,PSME3,RACK1,CHD8
2_Member	GO Biological Processes	GO:0060070	canonical Wnt signaling pathway	-3.17859	-1.84805	15/340	1500,1654,1856,3728,5685,5690,5700,5705,5706,5707,5708,5718,7415,10197,57680	CTNND1,DDX3X,DVL2,JUP,PSMA4,PSMB2,PSMC1,PSMC5,PSMC6,PSMD1,PSMD2,PSMD12,VCP,PSME3,CHD8
2_Member	CORUM	CORUM:194	PA28gamma-20S proteasome	-2.7401	-1.46893	3/15	5685,5690,10197	PSMA4,PSMB2,PSME3
2_Member	GO Biological Processes	GO:0002221	pattern recognition receptor signaling pathway	-2.6837	-1.41767	10/200	1654,3329,4057,6279,6280,7184,7314,9958,26057,29110	DDX3X,HSPD1,LTF,S100A8,S100A9,HSP90B1,UBB,USP15,ANKRD17,TBK1
2_Member	GO Biological Processes	GO:1905114	cell surface receptor signaling pathway involved in cell-cell signaling	-2.62748	-1.37095	21/631	1213,1500,1642,1654,1856,3728,5216,5685,5690,5700,5705,5706,5707,5708,5718,7314,7415,10009,10197,10399,57680	CLTC,CTNND1,DDB1,DDX3X,DVL2,JUP,PFN1,PSMA4,PSMB2,PSMC1,PSMC5,PSMC6,PSMD1,PSMD2,PSMD12,UBB,VCP,ZBTB33,PSME3,RACK1,CHD8
2_Member	Reactome Gene Sets	R-HSA-1280218	Adaptive Immune System	-2.62702	-1.37088	24/760	375,1213,1778,3309,3832,5478,5685,5690,5700,5705,5706,5707,5708,5718,7314,7317,7534,7879,9320,9520,10075,10197,55905,63893	ARF1,CLTC,DYNC1H1,HSPA5,KIF11,PPIA,PSMA4,PSMB2,PSMC1,PSMC5,PSMC6,PSMD1,PSMD2,PSMD12,UBB,UBA1,YWHAZ,RAB7A,TRIP12,NPEPPS,HUWE1,PSME3,RNF114,UBE2O
2_Member	GO Biological Processes	GO:0038093	Fc receptor signaling pathway	-2.58764	-1.33783	11/241	1398,5594,5685,5690,5700,5705,5706,5707,5708,5718,10197	CRK,MAPK1,PSMA4,PSMB2,PSMC1,PSMC5,PSMC6,PSMD1,PSMD2,PSMD12,PSME3
2_Member	GO Biological Processes	GO:0048729	tissue morphogenesis	-2.57749	-1.32879	22/680	760,1072,1213,1856,2316,4522,5216,5685,5690,5700,5705,5706,5707,5708,5718,6201,7053,7414,7430,9500,10197,11331	CA2,CFL1,CLTC,DVL2,FLNA,MTHFD1,PFN1,PSMA4,PSMB2,PSMC1,PSMC5,PSMC6,PSMD1,PSMD2,PSMD12,RPS7,TGM3,VCL,EZR,MAGED1,PSME3,PHB2
2_Member	Reactome Gene Sets	R-HSA-382551	Transport of small molecules	-2.5421	-1.30398	23/728	293,476,760,1213,4738,5034,5245,5685,5690,5700,5705,5706,5707,5708,5718,7314,7415,7416,7417,7419,10197,11331,55832	SLC25A6,ATP1A1,CA2,CLTC,NEDD8,P4HB,PHB,PSMA4,PSMB2,PSMC1,PSMC5,PSMC6,PSMD1,PSMD2,PSMD12,UBB,VCP,VDAC1,VDAC2,VDAC3,PSME3,PHB2,CAND1
2_Member	GO Biological Processes	GO:0050851	antigen receptor-mediated signaling pathway	-2.51635	-1.28048	13/320	1399,5594,5685,5690,5700,5705,5706,5707,5708,5718,6188,7430,10197	CRKL,MAPK1,PSMA4,PSMB2,PSMC1,PSMC5,PSMC6,PSMD1,PSMD2,PSMD12,RPS3,EZR,PSME3
2_Member	GO Biological Processes	GO:0002224	toll-like receptor signaling pathway	-2.3479	-1.13362	8/154	1654,3329,4057,6279,6280,7184,7314,29110	DDX3X,HSPD1,LTF,S100A8,S100A9,HSP90B1,UBB,TBK1
2_Member	GO Biological Processes	GO:0002429	immune response-activating cell surface receptor signaling pathway	-2.16686	-0.980649	16/476	1387,1398,1399,2033,5594,5685,5690,5700,5705,5706,5707,5708,5718,6188,7430,10197	CREBBP,CRK,CRKL,EP300,MAPK1,PSMA4,PSMB2,PSMC1,PSMC5,PSMC6,PSMD1,PSMD2,PSMD12,RPS3,EZR,PSME3
3_Summary	GO Biological Processes	GO:0008380	RNA splicing	-21.8263	-19.3523	45/437	1153,1478,1653,1655,1660,2521,3178,3181,3184,3185,3187,3190,3192,4670,4691,4841,5093,5094,5725,6207,6231,6421,6606,6632,8570,9343,9588,10147,10492,10521,10594,11171,11319,23020,23350,23451,26986,27316,51593,55596,79026,84991,125950,220988,283742,64062,5903,7175,8021,55746,1654	CIRBP,CSTF2,DDX1,DDX5,DHX9,FUS,HNRNPA1,HNRNPA2B1,HNRNPD,HNRNPF,HNRNPH1,HNRNPK,HNRNPU,HNRNPM,NCL,NONO,PCBP1,PCBP2,PTBP1,RPS13,RPS26,SFPQ,SMN1,SNRPD1,KHSRP,EFTUD2,PRDX6,SUGP2,SYNCRIP,DDX17,PRPF8,STRAP,ECD,SNRNP200,U2SURP,SF3B1,PABPC1,RBMX,SRRT,ZCCHC8,AHNAK,RBM17,RAVER1,HNRNPA3,FAM98B,RBM26,RANBP2,TPR,NUP214,NUP133,DDX3X
3_Member	GO Biological Processes	GO:0008380	RNA splicing	-21.8263	-19.3523	45/437	1153,1478,1653,1655,1660,2521,3178,3181,3184,3185,3187,3190,3192,4670,4691,4841,5093,5094,5725,6207,6231,6421,6606,6632,8570,9343,9588,10147,10492,10521,10594,11171,11319,23020,23350,23451,26986,27316,51593,55596,79026,84991,125950,220988,283742	CIRBP,CSTF2,DDX1,DDX5,DHX9,FUS,HNRNPA1,HNRNPA2B1,HNRNPD,HNRNPF,HNRNPH1,HNRNPK,HNRNPU,HNRNPM,NCL,NONO,PCBP1,PCBP2,PTBP1,RPS13,RPS26,SFPQ,SMN1,SNRPD1,KHSRP,EFTUD2,PRDX6,SUGP2,SYNCRIP,DDX17,PRPF8,STRAP,ECD,SNRNP200,U2SURP,SF3B1,PABPC1,RBMX,SRRT,ZCCHC8,AHNAK,RBM17,RAVER1,HNRNPA3,FAM98B
3_Member	GO Biological Processes	GO:0000375	RNA splicing, via transesterification reactions	-20.1625	-17.7126	39/350	1153,1478,1653,1655,1660,2521,3178,3181,3184,3185,3187,3190,3192,4670,4691,4841,5093,5094,5725,6421,6606,6632,8570,9343,9588,10492,10521,10594,11171,23020,23350,23451,26986,27316,51593,55596,84991,125950,220988	CIRBP,CSTF2,DDX1,DDX5,DHX9,FUS,HNRNPA1,HNRNPA2B1,HNRNPD,HNRNPF,HNRNPH1,HNRNPK,HNRNPU,HNRNPM,NCL,NONO,PCBP1,PCBP2,PTBP1,SFPQ,SMN1,SNRPD1,KHSRP,EFTUD2,PRDX6,SYNCRIP,DDX17,PRPF8,STRAP,SNRNP200,U2SURP,SF3B1,PABPC1,RBMX,SRRT,ZCCHC8,RBM17,RAVER1,HNRNPA3
3_Member	GO Biological Processes	GO:0000377	RNA splicing, via transesterification reactions with bulged adenosine as nucleophile	-19.3878	-16.9772	38/347	1153,1478,1653,1655,1660,2521,3178,3181,3184,3185,3187,3190,3192,4670,4691,4841,5093,5094,5725,6421,6606,6632,9343,9588,10492,10521,10594,11171,23020,23350,23451,26986,27316,51593,55596,84991,125950,220988	CIRBP,CSTF2,DDX1,DDX5,DHX9,FUS,HNRNPA1,HNRNPA2B1,HNRNPD,HNRNPF,HNRNPH1,HNRNPK,HNRNPU,HNRNPM,NCL,NONO,PCBP1,PCBP2,PTBP1,SFPQ,SMN1,SNRPD1,EFTUD2,PRDX6,SYNCRIP,DDX17,PRPF8,STRAP,SNRNP200,U2SURP,SF3B1,PABPC1,RBMX,SRRT,ZCCHC8,RBM17,RAVER1,HNRNPA3
3_Member	GO Biological Processes	GO:0000398	mRNA splicing, via spliceosome	-19.3878	-16.9772	38/347	1153,1478,1653,1655,1660,2521,3178,3181,3184,3185,3187,3190,3192,4670,4691,4841,5093,5094,5725,6421,6606,6632,9343,9588,10492,10521,10594,11171,23020,23350,23451,26986,27316,51593,55596,84991,125950,220988	CIRBP,CSTF2,DDX1,DDX5,DHX9,FUS,HNRNPA1,HNRNPA2B1,HNRNPD,HNRNPF,HNRNPH1,HNRNPK,HNRNPU,HNRNPM,NCL,NONO,PCBP1,PCBP2,PTBP1,SFPQ,SMN1,SNRPD1,EFTUD2,PRDX6,SYNCRIP,DDX17,PRPF8,STRAP,SNRNP200,U2SURP,SF3B1,PABPC1,RBMX,SRRT,ZCCHC8,RBM17,RAVER1,HNRNPA3
3_Member	GO Biological Processes	GO:0006397	mRNA processing	-16.8326	-14.482	42/508	1153,1478,1653,1655,1660,2521,3178,3181,3184,3185,3187,3190,3192,4670,4691,4841,5093,5094,5725,6421,6606,6632,8570,9343,9588,10147,10492,10521,10594,11171,11319,23020,23350,23451,26986,27316,51593,55596,64062,84991,125950,220988	CIRBP,CSTF2,DDX1,DDX5,DHX9,FUS,HNRNPA1,HNRNPA2B1,HNRNPD,HNRNPF,HNRNPH1,HNRNPK,HNRNPU,HNRNPM,NCL,NONO,PCBP1,PCBP2,PTBP1,SFPQ,SMN1,SNRPD1,KHSRP,EFTUD2,PRDX6,SUGP2,SYNCRIP,DDX17,PRPF8,STRAP,ECD,SNRNP200,U2SURP,SF3B1,PABPC1,RBMX,SRRT,ZCCHC8,RBM26,RBM17,RAVER1,HNRNPA3
3_Member	Reactome Gene Sets	R-HSA-72203	Processing of Capped Intron-Containing Pre-mRNA	-15.8441	-13.5118	29/244	1478,1655,1660,2521,3178,3181,3184,3185,3187,3190,3192,4670,5093,5094,5725,5903,6632,7175,8021,9343,10594,23020,23350,23451,27316,51593,55746,84991,220988	CSTF2,DDX5,DHX9,FUS,HNRNPA1,HNRNPA2B1,HNRNPD,HNRNPF,HNRNPH1,HNRNPK,HNRNPU,HNRNPM,PCBP1,PCBP2,PTBP1,RANBP2,SNRPD1,TPR,NUP214,EFTUD2,PRPF8,SNRNP200,U2SURP,SF3B1,RBMX,SRRT,NUP133,RBM17,HNRNPA3
3_Member	Reactome Gene Sets	R-HSA-72163	mRNA Splicing - Major Pathway	-15.1608	-12.8373	25/183	1478,1655,1660,2521,3178,3181,3184,3185,3187,3190,3192,4670,5093,5094,5725,6632,9343,10594,23020,23350,23451,27316,51593,84991,220988	CSTF2,DDX5,DHX9,FUS,HNRNPA1,HNRNPA2B1,HNRNPD,HNRNPF,HNRNPH1,HNRNPK,HNRNPU,HNRNPM,PCBP1,PCBP2,PTBP1,SNRPD1,EFTUD2,PRPF8,SNRNP200,U2SURP,SF3B1,RBMX,SRRT,RBM17,HNRNPA3
3_Member	CORUM	CORUM:1181	C complex spliceosome	-15.1083	-12.7892	18/79	1655,3178,3181,3185,3187,3190,3192,4670,6632,9343,10492,10594,23020,23451,26986,27316,55596,220988	DDX5,HNRNPA1,HNRNPA2B1,HNRNPF,HNRNPH1,HNRNPK,HNRNPU,HNRNPM,SNRPD1,EFTUD2,SYNCRIP,PRPF8,SNRNP200,SF3B1,PABPC1,RBMX,ZCCHC8,HNRNPA3
3_Member	Reactome Gene Sets	R-HSA-72172	mRNA Splicing	-14.7165	-12.4227	25/191	1478,1655,1660,2521,3178,3181,3184,3185,3187,3190,3192,4670,5093,5094,5725,6632,9343,10594,23020,23350,23451,27316,51593,84991,220988	CSTF2,DDX5,DHX9,FUS,HNRNPA1,HNRNPA2B1,HNRNPD,HNRNPF,HNRNPH1,HNRNPK,HNRNPU,HNRNPM,PCBP1,PCBP2,PTBP1,SNRPD1,EFTUD2,PRPF8,SNRNP200,U2SURP,SF3B1,RBMX,SRRT,RBM17,HNRNPA3
3_Member	GO Biological Processes	GO:0043484	regulation of RNA splicing	-10.5713	-8.52175	18/141	1153,1655,2521,3178,3181,3185,3187,3190,3192,4691,5725,6207,6231,9588,10521,27316,79026,84991	CIRBP,DDX5,FUS,HNRNPA1,HNRNPA2B1,HNRNPF,HNRNPH1,HNRNPK,HNRNPU,NCL,PTBP1,RPS13,RPS26,PRDX6,DDX17,RBMX,AHNAK,RBM17
3_Member	KEGG Pathway	hsa03040	Spliceosome	-8.11071	-6.25699	15/134	1655,3178,3190,3192,4670,5093,6632,9343,10594,23020,23350,23451,27316,84991,220988	DDX5,HNRNPA1,HNRNPK,HNRNPU,HNRNPM,PCBP1,SNRPD1,EFTUD2,PRPF8,SNRNP200,U2SURP,SF3B1,RBMX,RBM17,HNRNPA3
3_Member	CORUM	CORUM:351	Spliceosome	-6.9474	-5.20922	14/141	1153,1654,1655,1660,6632,9343,10521,10594,23020,23350,23451,26986,51593,84991	CIRBP,DDX3X,DDX5,DHX9,SNRPD1,EFTUD2,DDX17,PRPF8,SNRNP200,U2SURP,SF3B1,PABPC1,SRRT,RBM17
3_Member	GO Biological Processes	GO:0048024	regulation of mRNA splicing, via spliceosome	-6.75421	-5.037	12/104	1153,1655,3178,3181,3190,3192,4691,5725,9588,10521,27316,84991	CIRBP,DDX5,HNRNPA1,HNRNPA2B1,HNRNPK,HNRNPU,NCL,PTBP1,PRDX6,DDX17,RBMX,RBM17
3_Member	GO Biological Processes	GO:0000380	alternative mRNA splicing, via spliceosome	-6.10222	-4.44776	10/79	1655,1660,3178,3192,4670,5725,6421,10521,27316,84991	DDX5,DHX9,HNRNPA1,HNRNPU,HNRNPM,PTBP1,SFPQ,DDX17,RBMX,RBM17
3_Member	GO Biological Processes	GO:0050684	regulation of mRNA processing	-6.05161	-4.40182	13/143	1153,1655,1660,3178,3181,3190,3192,4691,5725,9588,10521,27316,84991	CIRBP,DDX5,DHX9,HNRNPA1,HNRNPA2B1,HNRNPK,HNRNPU,NCL,PTBP1,PRDX6,DDX17,RBMX,RBM17
3_Member	GO Biological Processes	GO:0000381	regulation of alternative mRNA splicing, via spliceosome	-3.85374	-2.44898	7/68	1655,3178,3192,5725,10521,27316,84991	DDX5,HNRNPA1,HNRNPU,PTBP1,DDX17,RBMX,RBM17
4_Summary	GO Biological Processes	GO:0034504	protein localization to nucleus	-21.1628	-18.701	36/272	908,1434,2316,3192,3728,3836,3837,3838,3839,3842,3843,5514,5594,5901,5903,5905,6135,6774,6950,7175,7203,7295,7514,7531,8021,9500,9531,10574,10575,10576,10694,11331,22948,23607,55746,79711,1660,1984,2810,3178,3181,3313,5976,6606,6632,57510,64062,3308,3329,9131,55750,1213,1399,2664,3301,7430,7534,8878,9520,9747,10075,10399,10971,55968,375,5478,293,301,1778,760,6279,9255	CCT6A,CSE1L,FLNA,HNRNPU,JUP,KPNA1,KPNB1,KPNA2,KPNA3,TNPO1,IPO5,PPP1R10,MAPK1,RAN,RANBP2,RANGAP1,RPL11,STAT3,TCP1,TPR,CCT3,TXN,XPO1,YWHAE,NUP214,MAGED1,BAG3,CCT7,CCT4,CCT2,CCT8,PHB2,CCT5,CD2AP,NUP133,IPO4,DHX9,EIF5A,SFN,HNRNPA1,HNRNPA2B1,HSPA9,UPF1,SMN1,SNRPD1,XPO5,RBM26,HSPA4,HSPD1,AIFM1,AGK,CLTC,CRKL,GDI1,DNAJA1,EZR,YWHAZ,SQSTM1,NPEPPS,TCAF1,HUWE1,RACK1,YWHAQ,NSFL1C,ARF1,PPIA,SLC25A6,ANXA1,DYNC1…
4_Member	GO Biological Processes	GO:0034504	protein localization to nucleus	-21.1628	-18.701	36/272	908,1434,2316,3192,3728,3836,3837,3838,3839,3842,3843,5514,5594,5901,5903,5905,6135,6774,6950,7175,7203,7295,7514,7531,8021,9500,9531,10574,10575,10576,10694,11331,22948,23607,55746,79711	CCT6A,CSE1L,FLNA,HNRNPU,JUP,KPNA1,KPNB1,KPNA2,KPNA3,TNPO1,IPO5,PPP1R10,MAPK1,RAN,RANBP2,RANGAP1,RPL11,STAT3,TCP1,TPR,CCT3,TXN,XPO1,YWHAE,NUP214,MAGED1,BAG3,CCT7,CCT4,CCT2,CCT8,PHB2,CCT5,CD2AP,NUP133,IPO4
4_Member	GO Biological Processes	GO:0006913	nucleocytoplasmic transport	-16.5471	-14.2011	35/352	1434,1660,1984,2316,2810,3178,3181,3313,3728,3836,3837,3838,3839,3842,3843,5514,5594,5901,5903,5905,5976,6606,6632,6774,7175,7295,7514,7531,8021,9531,11331,55746,57510,64062,79711	CSE1L,DHX9,EIF5A,FLNA,SFN,HNRNPA1,HNRNPA2B1,HSPA9,JUP,KPNA1,KPNB1,KPNA2,KPNA3,TNPO1,IPO5,PPP1R10,MAPK1,RAN,RANBP2,RANGAP1,UPF1,SMN1,SNRPD1,STAT3,TPR,TXN,XPO1,YWHAE,NUP214,BAG3,PHB2,NUP133,XPO5,RBM26,IPO4
4_Member	GO Biological Processes	GO:0051169	nuclear transport	-16.4311	-14.0898	35/355	1434,1660,1984,2316,2810,3178,3181,3313,3728,3836,3837,3838,3839,3842,3843,5514,5594,5901,5903,5905,5976,6606,6632,6774,7175,7295,7514,7531,8021,9531,11331,55746,57510,64062,79711	CSE1L,DHX9,EIF5A,FLNA,SFN,HNRNPA1,HNRNPA2B1,HSPA9,JUP,KPNA1,KPNB1,KPNA2,KPNA3,TNPO1,IPO5,PPP1R10,MAPK1,RAN,RANBP2,RANGAP1,UPF1,SMN1,SNRPD1,STAT3,TPR,TXN,XPO1,YWHAE,NUP214,BAG3,PHB2,NUP133,XPO5,RBM26,IPO4
4_Member	GO Biological Processes	GO:0051170	import into nucleus	-13.8986	-11.6364	23/170	1434,2316,3178,3728,3836,3837,3838,3839,3842,3843,5514,5594,5901,5903,6606,6632,6774,7175,8021,9531,11331,55746,79711	CSE1L,FLNA,HNRNPA1,JUP,KPNA1,KPNB1,KPNA2,KPNA3,TNPO1,IPO5,PPP1R10,MAPK1,RAN,RANBP2,SMN1,SNRPD1,STAT3,TPR,NUP214,BAG3,PHB2,NUP133,IPO4
4_Member	GO Biological Processes	GO:0017038	protein import	-13.0078	-10.7993	24/206	1434,2316,3308,3329,3728,3836,3837,3838,3839,3842,3843,5514,5594,5901,5903,6774,7175,8021,9131,9531,11331,55746,55750,79711	CSE1L,FLNA,HSPA4,HSPD1,JUP,KPNA1,KPNB1,KPNA2,KPNA3,TNPO1,IPO5,PPP1R10,MAPK1,RAN,RANBP2,STAT3,TPR,NUP214,AIFM1,BAG3,PHB2,NUP133,AGK,IPO4
4_Member	GO Biological Processes	GO:1900182	positive regulation of protein localization to nucleus	-12.7296	-10.5408	16/78	908,2316,3728,3843,5594,5901,6950,7175,7203,9531,10574,10575,10576,10694,22948,23607	CCT6A,FLNA,JUP,IPO5,MAPK1,RAN,TCP1,TPR,CCT3,BAG3,CCT7,CCT4,CCT2,CCT8,CCT5,CD2AP
4_Member	GO Biological Processes	GO:0006606	protein import into nucleus	-12.0947	-9.95453	20/149	1434,2316,3728,3836,3837,3838,3839,3842,3843,5514,5594,5901,5903,6774,7175,8021,9531,11331,55746,79711	CSE1L,FLNA,JUP,KPNA1,KPNB1,KPNA2,KPNA3,TNPO1,IPO5,PPP1R10,MAPK1,RAN,RANBP2,STAT3,TPR,NUP214,BAG3,PHB2,NUP133,IPO4
4_Member	GO Biological Processes	GO:1903827	regulation of cellular protein localization	-11.7589	-9.64388	36/536	908,1213,1399,2316,2664,2810,3301,3728,3843,5594,5901,5905,6950,7175,7203,7295,7430,7514,7531,7534,8878,9500,9520,9531,9747,10075,10399,10574,10575,10576,10694,10971,22948,23607,55968,57510	CCT6A,CLTC,CRKL,FLNA,GDI1,SFN,DNAJA1,JUP,IPO5,MAPK1,RAN,RANGAP1,TCP1,TPR,CCT3,TXN,EZR,XPO1,YWHAE,YWHAZ,SQSTM1,MAGED1,NPEPPS,BAG3,TCAF1,HUWE1,RACK1,CCT7,CCT4,CCT2,CCT8,YWHAQ,CCT5,CD2AP,NSFL1C,XPO5
4_Member	GO Biological Processes	GO:1900180	regulation of protein localization to nucleus	-10.5766	-8.52466	17/123	908,2316,3728,3843,5594,5901,6950,7175,7203,9500,9531,10574,10575,10576,10694,22948,23607	CCT6A,FLNA,JUP,IPO5,MAPK1,RAN,TCP1,TPR,CCT3,MAGED1,BAG3,CCT7,CCT4,CCT2,CCT8,CCT5,CD2AP
4_Member	GO Biological Processes	GO:0046822	regulation of nucleocytoplasmic transport	-10.2113	-8.1778	16/112	1660,2316,2810,3728,3843,5594,5901,5905,7175,7295,7514,7531,8021,9531,57510,64062	DHX9,FLNA,SFN,JUP,IPO5,MAPK1,RAN,RANGAP1,TPR,TXN,XPO1,YWHAE,NUP214,BAG3,XPO5,RBM26
4_Member	GO Biological Processes	GO:1903829	positive regulation of cellular protein localization	-10.0901	-8.06988	26/331	908,2316,2810,3728,3843,5594,5901,6950,7175,7203,7430,7531,7534,8878,9520,9531,9747,10075,10399,10574,10575,10576,10694,10971,22948,23607	CCT6A,FLNA,SFN,JUP,IPO5,MAPK1,RAN,TCP1,TPR,CCT3,EZR,YWHAE,YWHAZ,SQSTM1,NPEPPS,BAG3,TCAF1,HUWE1,RACK1,CCT7,CCT4,CCT2,CCT8,YWHAQ,CCT5,CD2AP
4_Member	GO Biological Processes	GO:1904951	positive regulation of establishment of protein localization	-8.84063	-6.91598	29/464	375,908,1660,2316,2810,3329,3728,3843,5478,5594,5901,6950,7175,7203,7430,7531,7534,9520,9531,9747,10075,10399,10574,10575,10576,10694,10971,22948,23607	ARF1,CCT6A,DHX9,FLNA,SFN,HSPD1,JUP,IPO5,PPIA,MAPK1,RAN,TCP1,TPR,CCT3,EZR,YWHAE,YWHAZ,NPEPPS,BAG3,TCAF1,HUWE1,RACK1,CCT7,CCT4,CCT2,CCT8,YWHAQ,CCT5,CD2AP
4_Member	GO Biological Processes	GO:0070201	regulation of establishment of protein localization	-7.95332	-6.11566	37/772	293,301,375,908,1660,2316,2664,2810,3301,3329,3728,3843,5478,5594,5901,5905,6950,7175,7203,7295,7430,7514,7531,7534,9520,9531,9747,10075,10399,10574,10575,10576,10694,10971,22948,23607,57510	SLC25A6,ANXA1,ARF1,CCT6A,DHX9,FLNA,GDI1,SFN,DNAJA1,HSPD1,JUP,IPO5,PPIA,MAPK1,RAN,RANGAP1,TCP1,TPR,CCT3,TXN,EZR,XPO1,YWHAE,YWHAZ,NPEPPS,BAG3,TCAF1,HUWE1,RACK1,CCT7,CCT4,CCT2,CCT8,YWHAQ,CCT5,CD2AP,XPO5
4_Member	GO Biological Processes	GO:0046824	positive regulation of nucleocytoplasmic transport	-7.92907	-6.09284	11/66	1660,2316,2810,3728,3843,5594,5901,7175,7531,9531,64062	DHX9,FLNA,SFN,JUP,IPO5,MAPK1,RAN,TPR,YWHAE,BAG3,RBM26
4_Member	GO Biological Processes	GO:0032388	positive regulation of intracellular transport	-6.66907	-4.95742	17/221	375,1660,1778,2316,2810,3728,3843,5594,5901,7175,7430,7531,9520,9531,9747,10075,64062	ARF1,DHX9,DYNC1H1,FLNA,SFN,JUP,IPO5,MAPK1,RAN,TPR,EZR,YWHAE,NPEPPS,BAG3,TCAF1,HUWE1,RBM26
4_Member	GO Biological Processes	GO:0033157	regulation of intracellular protein transport	-6.29127	-4.62053	17/235	2316,2664,2810,3728,3843,5594,5901,5905,7175,7295,7514,7531,9520,9531,9747,10075,57510	FLNA,GDI1,SFN,JUP,IPO5,MAPK1,RAN,RANGAP1,TPR,TXN,XPO1,YWHAE,NPEPPS,BAG3,TCAF1,HUWE1,XPO5
4_Member	GO Biological Processes	GO:0032386	regulation of intracellular transport	-5.85178	-4.2299	23/435	375,1660,1778,2316,2664,2810,3728,3843,5594,5901,5905,7175,7295,7430,7514,7531,8021,9520,9531,9747,10075,57510,64062	ARF1,DHX9,DYNC1H1,FLNA,GDI1,SFN,JUP,IPO5,MAPK1,RAN,RANGAP1,TPR,TXN,EZR,XPO1,YWHAE,NUP214,NPEPPS,BAG3,TCAF1,HUWE1,XPO5,RBM26
4_Member	GO Biological Processes	GO:0042307	positive regulation of protein import into nucleus	-5.39528	-3.81017	7/40	2316,3728,3843,5594,5901,7175,9531	FLNA,JUP,IPO5,MAPK1,RAN,TPR,BAG3
4_Member	GO Biological Processes	GO:1904591	positive regulation of protein import	-5.24729	-3.68329	7/42	2316,3728,3843,5594,5901,7175,9531	FLNA,JUP,IPO5,MAPK1,RAN,TPR,BAG3
4_Member	GO Biological Processes	GO:0090087	regulation of peptide transport	-4.90258	-3.37093	30/755	293,301,375,760,1660,2316,2664,2810,3301,3329,3728,3843,5478,5594,5901,5905,6279,7175,7295,7430,7514,7531,9255,9520,9531,9747,10075,10399,23607,57510	SLC25A6,ANXA1,ARF1,CA2,DHX9,FLNA,GDI1,SFN,DNAJA1,HSPD1,JUP,IPO5,PPIA,MAPK1,RAN,RANGAP1,S100A8,TPR,TXN,EZR,XPO1,YWHAE,AIMP1,NPEPPS,BAG3,TCAF1,HUWE1,RACK1,CD2AP,XPO5
4_Member	GO Biological Processes	GO:0090316	positive regulation of intracellular protein transport	-4.85356	-3.32755	12/157	2316,2810,3728,3843,5594,5901,7175,7531,9520,9531,9747,10075	FLNA,SFN,JUP,IPO5,MAPK1,RAN,TPR,YWHAE,NPEPPS,BAG3,TCAF1,HUWE1
4_Member	GO Biological Processes	GO:0042306	regulation of protein import into nucleus	-4.25136	-2.79914	7/59	2316,3728,3843,5594,5901,7175,9531	FLNA,JUP,IPO5,MAPK1,RAN,TPR,BAG3
4_Member	GO Biological Processes	GO:1904589	regulation of protein import	-4.11119	-2.67631	7/62	2316,3728,3843,5594,5901,7175,9531	FLNA,JUP,IPO5,MAPK1,RAN,TPR,BAG3
4_Member	GO Biological Processes	GO:0051223	regulation of protein transport	-3.99382	-2.57726	27/725	293,301,375,1660,2316,2664,2810,3301,3329,3728,3843,5478,5594,5901,5905,7175,7295,7430,7514,7531,9520,9531,9747,10075,10399,23607,57510	SLC25A6,ANXA1,ARF1,DHX9,FLNA,GDI1,SFN,DNAJA1,HSPD1,JUP,IPO5,PPIA,MAPK1,RAN,RANGAP1,TPR,TXN,EZR,XPO1,YWHAE,NPEPPS,BAG3,TCAF1,HUWE1,RACK1,CD2AP,XPO5
4_Member	GO Biological Processes	GO:0051222	positive regulation of protein transport	-3.93719	-2.52657	19/426	375,1660,2316,2810,3329,3728,3843,5478,5594,5901,7175,7430,7531,9520,9531,9747,10075,10399,23607	ARF1,DHX9,FLNA,SFN,HSPD1,JUP,IPO5,PPIA,MAPK1,RAN,TPR,EZR,YWHAE,NPEPPS,BAG3,TCAF1,HUWE1,RACK1,CD2AP
5_Summary	GO Biological Processes	GO:0009260	ribonucleotide biosynthetic process	-20.109	-17.6707	36/292	38,47,204,226,471,498,506,509,539,790,1738,2023,2033,2194,2618,3251,3614,3615,3939,4830,4832,4833,5223,5315,5903,6774,7167,7175,7415,8021,8833,9611,10165,10606,55746,79877,4522,5594,7298,375,377,2171,7086,51552,55750,4191,4200,5901,29789,191,1213,6184,55577,60496,3945,7416,3313,5052,9588,10935,56898,8402,1431,10131,11331,26227,301,4048,5832,1642,7874,223,501,23193,7314	ACAT1,ACLY,AK2,ALDOA,ATIC,ATP5F1A,ATP5F1B,ATP5F1C,ATP5PO,CAD,DLD,ENO1,EP300,FASN,GART,HPRT1,IMPDH1,IMPDH2,LDHA,NME1,NME3,NME4,PGAM1,PKM,RANBP2,STAT3,TPI1,TPR,VCP,NUP214,GMPS,NCOR1,SLC25A13,PAICS,NUP133,DCAKD,MTHFD1,MAPK1,TYMS,ARF1,ARF3,FABP5,TKT,RAB14,AGK,MDH2,ME2,RAN,OLA1,AHCY,CLTC,RPN1,NAGK,AASDHPPT,LDHB,VDAC1,HSPA9,PRDX1,PRDX6,PRDX3,BDH2,SLC25A11,CS,TRAP1,PHB2,PHGDH,ANXA1,LTA4H,ALDH18A1,DDB1,U…
5_Member	GO Biological Processes	GO:0009260	ribonucleotide biosynthetic process	-20.109	-17.6707	36/292	38,47,204,226,471,498,506,509,539,790,1738,2023,2033,2194,2618,3251,3614,3615,3939,4830,4832,4833,5223,5315,5903,6774,7167,7175,7415,8021,8833,9611,10165,10606,55746,79877	ACAT1,ACLY,AK2,ALDOA,ATIC,ATP5F1A,ATP5F1B,ATP5F1C,ATP5PO,CAD,DLD,ENO1,EP300,FASN,GART,HPRT1,IMPDH1,IMPDH2,LDHA,NME1,NME3,NME4,PGAM1,PKM,RANBP2,STAT3,TPI1,TPR,VCP,NUP214,GMPS,NCOR1,SLC25A13,PAICS,NUP133,DCAKD
5_Member	GO Biological Processes	GO:0009152	purine ribonucleotide biosynthetic process	-19.8088	-17.3762	35/279	38,47,204,226,471,498,506,509,539,1738,2023,2033,2194,2618,3251,3614,3615,3939,4830,4832,4833,5223,5315,5903,6774,7167,7175,7415,8021,8833,9611,10165,10606,55746,79877	ACAT1,ACLY,AK2,ALDOA,ATIC,ATP5F1A,ATP5F1B,ATP5F1C,ATP5PO,DLD,ENO1,EP300,FASN,GART,HPRT1,IMPDH1,IMPDH2,LDHA,NME1,NME3,NME4,PGAM1,PKM,RANBP2,STAT3,TPI1,TPR,VCP,NUP214,GMPS,NCOR1,SLC25A13,PAICS,NUP133,DCAKD
5_Member	GO Biological Processes	GO:0046390	ribose phosphate biosynthetic process	-19.7605	-17.3335	36/299	38,47,204,226,471,498,506,509,539,790,1738,2023,2033,2194,2618,3251,3614,3615,3939,4830,4832,4833,5223,5315,5903,6774,7167,7175,7415,8021,8833,9611,10165,10606,55746,79877	ACAT1,ACLY,AK2,ALDOA,ATIC,ATP5F1A,ATP5F1B,ATP5F1C,ATP5PO,CAD,DLD,ENO1,EP300,FASN,GART,HPRT1,IMPDH1,IMPDH2,LDHA,NME1,NME3,NME4,PGAM1,PKM,RANBP2,STAT3,TPI1,TPR,VCP,NUP214,GMPS,NCOR1,SLC25A13,PAICS,NUP133,DCAKD
5_Member	GO Biological Processes	GO:0006164	purine nucleotide biosynthetic process	-19.7115	-17.2901	36/300	38,47,204,226,471,498,506,509,539,1738,2023,2033,2194,2618,3251,3614,3615,3939,4522,4830,4832,4833,5223,5315,5903,6774,7167,7175,7415,8021,8833,9611,10165,10606,55746,79877	ACAT1,ACLY,AK2,ALDOA,ATIC,ATP5F1A,ATP5F1B,ATP5F1C,ATP5PO,DLD,ENO1,EP300,FASN,GART,HPRT1,IMPDH1,IMPDH2,LDHA,MTHFD1,NME1,NME3,NME4,PGAM1,PKM,RANBP2,STAT3,TPI1,TPR,VCP,NUP214,GMPS,NCOR1,SLC25A13,PAICS,NUP133,DCAKD
5_Member	GO Biological Processes	GO:0072522	purine-containing compound biosynthetic process	-19.0923	-16.687	36/313	38,47,204,226,471,498,506,509,539,1738,2023,2033,2194,2618,3251,3614,3615,3939,4522,4830,4832,4833,5223,5315,5903,6774,7167,7175,7415,8021,8833,9611,10165,10606,55746,79877	ACAT1,ACLY,AK2,ALDOA,ATIC,ATP5F1A,ATP5F1B,ATP5F1C,ATP5PO,DLD,ENO1,EP300,FASN,GART,HPRT1,IMPDH1,IMPDH2,LDHA,MTHFD1,NME1,NME3,NME4,PGAM1,PKM,RANBP2,STAT3,TPI1,TPR,VCP,NUP214,GMPS,NCOR1,SLC25A13,PAICS,NUP133,DCAKD
5_Member	GO Biological Processes	GO:0009165	nucleotide biosynthetic process	-18.6864	-16.2864	39/385	38,47,204,226,471,498,506,509,539,790,1738,2023,2033,2194,2618,3251,3614,3615,3939,4522,4830,4832,4833,5223,5315,5594,5903,6774,7167,7175,7298,7415,8021,8833,9611,10165,10606,55746,79877	ACAT1,ACLY,AK2,ALDOA,ATIC,ATP5F1A,ATP5F1B,ATP5F1C,ATP5PO,CAD,DLD,ENO1,EP300,FASN,GART,HPRT1,IMPDH1,IMPDH2,LDHA,MTHFD1,NME1,NME3,NME4,PGAM1,PKM,MAPK1,RANBP2,STAT3,TPI1,TPR,TYMS,VCP,NUP214,GMPS,NCOR1,SLC25A13,PAICS,NUP133,DCAKD
5_Member	GO Biological Processes	GO:1901293	nucleoside phosphate biosynthetic process	-18.5282	-16.1385	39/389	38,47,204,226,471,498,506,509,539,790,1738,2023,2033,2194,2618,3251,3614,3615,3939,4522,4830,4832,4833,5223,5315,5594,5903,6774,7167,7175,7298,7415,8021,8833,9611,10165,10606,55746,79877	ACAT1,ACLY,AK2,ALDOA,ATIC,ATP5F1A,ATP5F1B,ATP5F1C,ATP5PO,CAD,DLD,ENO1,EP300,FASN,GART,HPRT1,IMPDH1,IMPDH2,LDHA,MTHFD1,NME1,NME3,NME4,PGAM1,PKM,MAPK1,RANBP2,STAT3,TPI1,TPR,TYMS,VCP,NUP214,GMPS,NCOR1,SLC25A13,PAICS,NUP133,DCAKD
5_Member	GO Biological Processes	GO:0009124	nucleoside monophosphate biosynthetic process	-17.7537	-15.379	29/208	204,226,471,498,506,509,539,790,2023,2033,2618,3251,3614,3615,3939,5223,5315,5903,6774,7167,7175,7298,7415,8021,8833,9611,10165,10606,55746	AK2,ALDOA,ATIC,ATP5F1A,ATP5F1B,ATP5F1C,ATP5PO,CAD,ENO1,EP300,GART,HPRT1,IMPDH1,IMPDH2,LDHA,PGAM1,PKM,RANBP2,STAT3,TPI1,TPR,TYMS,VCP,NUP214,GMPS,NCOR1,SLC25A13,PAICS,NUP133
5_Member	GO Biological Processes	GO:0009156	ribonucleoside monophosphate biosynthetic process	-17.3839	-15.0142	28/197	204,226,471,498,506,509,539,790,2023,2033,2618,3251,3614,3615,3939,5223,5315,5903,6774,7167,7175,7415,8021,8833,9611,10165,10606,55746	AK2,ALDOA,ATIC,ATP5F1A,ATP5F1B,ATP5F1C,ATP5PO,CAD,ENO1,EP300,GART,HPRT1,IMPDH1,IMPDH2,LDHA,PGAM1,PKM,RANBP2,STAT3,TPI1,TPR,VCP,NUP214,GMPS,NCOR1,SLC25A13,PAICS,NUP133
5_Member	GO Biological Processes	GO:0009127	purine nucleoside monophosphate biosynthetic process	-17.2062	-14.8461	27/183	204,226,471,498,506,509,539,2023,2033,2618,3251,3614,3615,3939,5223,5315,5903,6774,7167,7175,7415,8021,8833,9611,10165,10606,55746	AK2,ALDOA,ATIC,ATP5F1A,ATP5F1B,ATP5F1C,ATP5PO,ENO1,EP300,GART,HPRT1,IMPDH1,IMPDH2,LDHA,PGAM1,PKM,RANBP2,STAT3,TPI1,TPR,VCP,NUP214,GMPS,NCOR1,SLC25A13,PAICS,NUP133
5_Member	GO Biological Processes	GO:0009168	purine ribonucleoside monophosphate biosynthetic process	-17.2062	-14.8461	27/183	204,226,471,498,506,509,539,2023,2033,2618,3251,3614,3615,3939,5223,5315,5903,6774,7167,7175,7415,8021,8833,9611,10165,10606,55746	AK2,ALDOA,ATIC,ATP5F1A,ATP5F1B,ATP5F1C,ATP5PO,ENO1,EP300,GART,HPRT1,IMPDH1,IMPDH2,LDHA,PGAM1,PKM,RANBP2,STAT3,TPI1,TPR,VCP,NUP214,GMPS,NCOR1,SLC25A13,PAICS,NUP133
5_Member	GO Biological Processes	GO:0009142	nucleoside triphosphate biosynthetic process	-15.8795	-13.5427	26/188	226,498,506,509,539,790,2023,2033,3614,3615,3939,4830,4832,4833,5223,5315,5903,6774,7167,7175,7298,7415,8021,9611,10165,55746	ALDOA,ATP5F1A,ATP5F1B,ATP5F1C,ATP5PO,CAD,ENO1,EP300,IMPDH1,IMPDH2,LDHA,NME1,NME3,NME4,PGAM1,PKM,RANBP2,STAT3,TPI1,TPR,TYMS,VCP,NUP214,NCOR1,SLC25A13,NUP133
5_Member	GO Biological Processes	GO:0009201	ribonucleoside triphosphate biosynthetic process	-15.5096	-13.1817	25/177	226,498,506,509,539,790,2023,2033,3614,3615,3939,4830,4832,4833,5223,5315,5903,6774,7167,7175,7415,8021,9611,10165,55746	ALDOA,ATP5F1A,ATP5F1B,ATP5F1C,ATP5PO,CAD,ENO1,EP300,IMPDH1,IMPDH2,LDHA,NME1,NME3,NME4,PGAM1,PKM,RANBP2,STAT3,TPI1,TPR,VCP,NUP214,NCOR1,SLC25A13,NUP133
5_Member	GO Biological Processes	GO:0009206	purine ribonucleoside triphosphate biosynthetic process	-14.8468	-12.5405	24/171	226,498,506,509,539,2023,2033,3614,3615,3939,4830,4832,4833,5223,5315,5903,6774,7167,7175,7415,8021,9611,10165,55746	ALDOA,ATP5F1A,ATP5F1B,ATP5F1C,ATP5PO,ENO1,EP300,IMPDH1,IMPDH2,LDHA,NME1,NME3,NME4,PGAM1,PKM,RANBP2,STAT3,TPI1,TPR,VCP,NUP214,NCOR1,SLC25A13,NUP133
5_Member	GO Biological Processes	GO:0009145	purine nucleoside triphosphate biosynthetic process	-14.7882	-12.4861	24/172	226,498,506,509,539,2023,2033,3614,3615,3939,4830,4832,4833,5223,5315,5903,6774,7167,7175,7415,8021,9611,10165,55746	ALDOA,ATP5F1A,ATP5F1B,ATP5F1C,ATP5PO,ENO1,EP300,IMPDH1,IMPDH2,LDHA,NME1,NME3,NME4,PGAM1,PKM,RANBP2,STAT3,TPI1,TPR,VCP,NUP214,NCOR1,SLC25A13,NUP133
5_Member	GO Biological Processes	GO:0090407	organophosphate biosynthetic process	-13.9318	-11.6658	45/700	38,47,204,226,375,377,471,498,506,509,539,790,1738,2023,2033,2171,2194,2618,3251,3614,3615,3939,4522,4830,4832,4833,5223,5315,5594,5903,6774,7086,7167,7175,7298,7415,8021,8833,9611,10165,10606,51552,55746,55750,79877	ACAT1,ACLY,AK2,ALDOA,ARF1,ARF3,ATIC,ATP5F1A,ATP5F1B,ATP5F1C,ATP5PO,CAD,DLD,ENO1,EP300,FABP5,FASN,GART,HPRT1,IMPDH1,IMPDH2,LDHA,MTHFD1,NME1,NME3,NME4,PGAM1,PKM,MAPK1,RANBP2,STAT3,TKT,TPI1,TPR,TYMS,VCP,NUP214,GMPS,NCOR1,SLC25A13,PAICS,RAB14,NUP133,AGK,DCAKD
5_Member	GO Biological Processes	GO:0009117	nucleotide metabolic process	-13.0706	-10.8587	44/710	38,47,204,226,471,498,506,509,539,790,1738,2023,2033,2194,2618,3251,3614,3615,3939,4191,4200,4522,4830,4832,4833,5223,5315,5594,5901,5903,6774,7086,7167,7175,7298,7415,8021,8833,9611,10165,10606,29789,55746,79877	ACAT1,ACLY,AK2,ALDOA,ATIC,ATP5F1A,ATP5F1B,ATP5F1C,ATP5PO,CAD,DLD,ENO1,EP300,FASN,GART,HPRT1,IMPDH1,IMPDH2,LDHA,MDH2,ME2,MTHFD1,NME1,NME3,NME4,PGAM1,PKM,MAPK1,RAN,RANBP2,STAT3,TKT,TPI1,TPR,TYMS,VCP,NUP214,GMPS,NCOR1,SLC25A13,PAICS,OLA1,NUP133,DCAKD
5_Member	GO Biological Processes	GO:0006753	nucleoside phosphate metabolic process	-12.9229	-10.7243	44/717	38,47,204,226,471,498,506,509,539,790,1738,2023,2033,2194,2618,3251,3614,3615,3939,4191,4200,4522,4830,4832,4833,5223,5315,5594,5901,5903,6774,7086,7167,7175,7298,7415,8021,8833,9611,10165,10606,29789,55746,79877	ACAT1,ACLY,AK2,ALDOA,ATIC,ATP5F1A,ATP5F1B,ATP5F1C,ATP5PO,CAD,DLD,ENO1,EP300,FASN,GART,HPRT1,IMPDH1,IMPDH2,LDHA,MDH2,ME2,MTHFD1,NME1,NME3,NME4,PGAM1,PKM,MAPK1,RAN,RANBP2,STAT3,TKT,TPI1,TPR,TYMS,VCP,NUP214,GMPS,NCOR1,SLC25A13,PAICS,OLA1,NUP133,DCAKD
5_Member	GO Biological Processes	GO:0019693	ribose phosphate metabolic process	-12.7709	-10.5789	39/578	38,47,204,226,471,498,506,509,539,790,1738,2023,2033,2194,2618,3251,3614,3615,3939,4830,4832,4833,5223,5315,5901,5903,6774,7086,7167,7175,7415,8021,8833,9611,10165,10606,29789,55746,79877	ACAT1,ACLY,AK2,ALDOA,ATIC,ATP5F1A,ATP5F1B,ATP5F1C,ATP5PO,CAD,DLD,ENO1,EP300,FASN,GART,HPRT1,IMPDH1,IMPDH2,LDHA,NME1,NME3,NME4,PGAM1,PKM,RAN,RANBP2,STAT3,TKT,TPI1,TPR,VCP,NUP214,GMPS,NCOR1,SLC25A13,PAICS,OLA1,NUP133,DCAKD
5_Member	GO Biological Processes	GO:0009259	ribonucleotide metabolic process	-12.5762	-10.4093	38/558	38,47,204,226,471,498,506,509,539,790,1738,2023,2033,2194,2618,3251,3614,3615,3939,4830,4832,4833,5223,5315,5901,5903,6774,7167,7175,7415,8021,8833,9611,10165,10606,29789,55746,79877	ACAT1,ACLY,AK2,ALDOA,ATIC,ATP5F1A,ATP5F1B,ATP5F1C,ATP5PO,CAD,DLD,ENO1,EP300,FASN,GART,HPRT1,IMPDH1,IMPDH2,LDHA,NME1,NME3,NME4,PGAM1,PKM,RAN,RANBP2,STAT3,TPI1,TPR,VCP,NUP214,GMPS,NCOR1,SLC25A13,PAICS,OLA1,NUP133,DCAKD
5_Member	GO Biological Processes	GO:0009123	nucleoside monophosphate metabolic process	-12.4567	-10.296	31/377	204,226,471,498,506,509,539,790,1738,2023,2033,2618,3251,3614,3615,3939,5223,5315,5903,6774,7167,7175,7298,7415,8021,8833,9611,10165,10606,29789,55746	AK2,ALDOA,ATIC,ATP5F1A,ATP5F1B,ATP5F1C,ATP5PO,CAD,DLD,ENO1,EP300,GART,HPRT1,IMPDH1,IMPDH2,LDHA,PGAM1,PKM,RANBP2,STAT3,TPI1,TPR,TYMS,VCP,NUP214,GMPS,NCOR1,SLC25A13,PAICS,OLA1,NUP133
5_Member	GO Biological Processes	GO:0009161	ribonucleoside monophosphate metabolic process	-12.345	-10.1872	30/356	204,226,471,498,506,509,539,790,1738,2023,2033,2618,3251,3614,3615,3939,5223,5315,5903,6774,7167,7175,7415,8021,8833,9611,10165,10606,29789,55746	AK2,ALDOA,ATIC,ATP5F1A,ATP5F1B,ATP5F1C,ATP5PO,CAD,DLD,ENO1,EP300,GART,HPRT1,IMPDH1,IMPDH2,LDHA,PGAM1,PKM,RANBP2,STAT3,TPI1,TPR,VCP,NUP214,GMPS,NCOR1,SLC25A13,PAICS,OLA1,NUP133
5_Member	GO Biological Processes	GO:0009150	purine ribonucleotide metabolic process	-12.2625	-10.1078	37/543	38,47,204,226,471,498,506,509,539,1738,2023,2033,2194,2618,3251,3614,3615,3939,4830,4832,4833,5223,5315,5901,5903,6774,7167,7175,7415,8021,8833,9611,10165,10606,29789,55746,79877	ACAT1,ACLY,AK2,ALDOA,ATIC,ATP5F1A,ATP5F1B,ATP5F1C,ATP5PO,DLD,ENO1,EP300,FASN,GART,HPRT1,IMPDH1,IMPDH2,LDHA,NME1,NME3,NME4,PGAM1,PKM,RAN,RANBP2,STAT3,TPI1,TPR,VCP,NUP214,GMPS,NCOR1,SLC25A13,PAICS,OLA1,NUP133,DCAKD
5_Member	GO Biological Processes	GO:0009141	nucleoside triphosphate metabolic process	-12.1576	-10.0058	30/362	204,226,498,506,509,539,790,1738,2023,2033,3614,3615,3939,4830,4832,4833,5223,5315,5901,5903,6774,7167,7175,7298,7415,8021,9611,10165,29789,55746	AK2,ALDOA,ATP5F1A,ATP5F1B,ATP5F1C,ATP5PO,CAD,DLD,ENO1,EP300,IMPDH1,IMPDH2,LDHA,NME1,NME3,NME4,PGAM1,PKM,RAN,RANBP2,STAT3,TPI1,TPR,TYMS,VCP,NUP214,NCOR1,SLC25A13,OLA1,NUP133
5_Member	GO Biological Processes	GO:0006163	purine nucleotide metabolic process	-12.1295	-9.98649	38/577	38,47,204,226,471,498,506,509,539,1738,2023,2033,2194,2618,3251,3614,3615,3939,4522,4830,4832,4833,5223,5315,5901,5903,6774,7167,7175,7415,8021,8833,9611,10165,10606,29789,55746,79877	ACAT1,ACLY,AK2,ALDOA,ATIC,ATP5F1A,ATP5F1B,ATP5F1C,ATP5PO,DLD,ENO1,EP300,FASN,GART,HPRT1,IMPDH1,IMPDH2,LDHA,MTHFD1,NME1,NME3,NME4,PGAM1,PKM,RAN,RANBP2,STAT3,TPI1,TPR,VCP,NUP214,GMPS,NCOR1,SLC25A13,PAICS,OLA1,NUP133,DCAKD
5_Member	GO Biological Processes	GO:0009199	ribonucleoside triphosphate metabolic process	-12.0493	-9.9158	29/341	204,226,498,506,509,539,790,1738,2023,2033,3614,3615,3939,4830,4832,4833,5223,5315,5901,5903,6774,7167,7175,7415,8021,9611,10165,29789,55746	AK2,ALDOA,ATP5F1A,ATP5F1B,ATP5F1C,ATP5PO,CAD,DLD,ENO1,EP300,IMPDH1,IMPDH2,LDHA,NME1,NME3,NME4,PGAM1,PKM,RAN,RANBP2,STAT3,TPI1,TPR,VCP,NUP214,NCOR1,SLC25A13,OLA1,NUP133
5_Member	GO Biological Processes	GO:0009167	purine ribonucleoside monophosphate metabolic process	-12.0175	-9.89148	29/342	204,226,471,498,506,509,539,1738,2023,2033,2618,3251,3614,3615,3939,5223,5315,5903,6774,7167,7175,7415,8021,8833,9611,10165,10606,29789,55746	AK2,ALDOA,ATIC,ATP5F1A,ATP5F1B,ATP5F1C,ATP5PO,DLD,ENO1,EP300,GART,HPRT1,IMPDH1,IMPDH2,LDHA,PGAM1,PKM,RANBP2,STAT3,TPI1,TPR,VCP,NUP214,GMPS,NCOR1,SLC25A13,PAICS,OLA1,NUP133
5_Member	GO Biological Processes	GO:0009126	purine nucleoside monophosphate metabolic process	-11.9857	-9.8625	29/343	204,226,471,498,506,509,539,1738,2023,2033,2618,3251,3614,3615,3939,5223,5315,5903,6774,7167,7175,7415,8021,8833,9611,10165,10606,29789,55746	AK2,ALDOA,ATIC,ATP5F1A,ATP5F1B,ATP5F1C,ATP5PO,DLD,ENO1,EP300,GART,HPRT1,IMPDH1,IMPDH2,LDHA,PGAM1,PKM,RANBP2,STAT3,TPI1,TPR,VCP,NUP214,GMPS,NCOR1,SLC25A13,PAICS,OLA1,NUP133
5_Member	GO Biological Processes	GO:0072521	purine-containing compound metabolic process	-11.9716	-9.85112	39/613	38,47,191,204,226,471,498,506,509,539,1738,2023,2033,2194,2618,3251,3614,3615,3939,4522,4830,4832,4833,5223,5315,5901,5903,6774,7167,7175,7415,8021,8833,9611,10165,10606,29789,55746,79877	ACAT1,ACLY,AHCY,AK2,ALDOA,ATIC,ATP5F1A,ATP5F1B,ATP5F1C,ATP5PO,DLD,ENO1,EP300,FASN,GART,HPRT1,IMPDH1,IMPDH2,LDHA,MTHFD1,NME1,NME3,NME4,PGAM1,PKM,RAN,RANBP2,STAT3,TPI1,TPR,VCP,NUP214,GMPS,NCOR1,SLC25A13,PAICS,OLA1,NUP133,DCAKD
5_Member	GO Biological Processes	GO:0009205	purine ribonucleoside triphosphate metabolic process	-11.4695	-9.37312	28/335	204,226,498,506,509,539,1738,2023,2033,3614,3615,3939,4830,4832,4833,5223,5315,5901,5903,6774,7167,7175,7415,8021,9611,10165,29789,55746	AK2,ALDOA,ATP5F1A,ATP5F1B,ATP5F1C,ATP5PO,DLD,ENO1,EP300,IMPDH1,IMPDH2,LDHA,NME1,NME3,NME4,PGAM1,PKM,RAN,RANBP2,STAT3,TPI1,TPR,VCP,NUP214,NCOR1,SLC25A13,OLA1,NUP133
5_Member	GO Biological Processes	GO:0009144	purine nucleoside triphosphate metabolic process	-11.2538	-9.16766	28/342	204,226,498,506,509,539,1738,2023,2033,3614,3615,3939,4830,4832,4833,5223,5315,5901,5903,6774,7167,7175,7415,8021,9611,10165,29789,55746	AK2,ALDOA,ATP5F1A,ATP5F1B,ATP5F1C,ATP5PO,DLD,ENO1,EP300,IMPDH1,IMPDH2,LDHA,NME1,NME3,NME4,PGAM1,PKM,RAN,RANBP2,STAT3,TPI1,TPR,VCP,NUP214,NCOR1,SLC25A13,OLA1,NUP133
5_Member	GO Biological Processes	GO:0034404	nucleobase-containing small molecule biosynthetic process	-11.2123	-9.12875	23/227	38,226,790,2023,2033,3251,3614,3615,3939,4830,4832,4833,5223,5315,5903,6774,7167,7175,7415,8021,8833,9611,55746	ACAT1,ALDOA,CAD,ENO1,EP300,HPRT1,IMPDH1,IMPDH2,LDHA,NME1,NME3,NME4,PGAM1,PKM,RANBP2,STAT3,TPI1,TPR,VCP,NUP214,GMPS,NCOR1,NUP133
5_Member	GO Biological Processes	GO:0006754	ATP biosynthetic process	-10.5647	-8.51743	19/160	226,498,506,509,539,2023,2033,3939,5223,5315,5903,6774,7167,7175,7415,8021,9611,10165,55746	ALDOA,ATP5F1A,ATP5F1B,ATP5F1C,ATP5PO,ENO1,EP300,LDHA,PGAM1,PKM,RANBP2,STAT3,TPI1,TPR,VCP,NUP214,NCOR1,SLC25A13,NUP133
5_Member	GO Biological Processes	GO:1901137	carbohydrate derivative biosynthetic process	-10.0601	-8.0442	41/774	38,47,204,226,471,498,506,509,539,790,1213,1738,2023,2033,2194,2618,3251,3614,3615,3939,4830,4832,4833,5223,5315,5903,6184,6774,7086,7167,7175,7298,7415,8021,8833,9611,10165,10606,55577,55746,79877	ACAT1,ACLY,AK2,ALDOA,ATIC,ATP5F1A,ATP5F1B,ATP5F1C,ATP5PO,CAD,CLTC,DLD,ENO1,EP300,FASN,GART,HPRT1,IMPDH1,IMPDH2,LDHA,NME1,NME3,NME4,PGAM1,PKM,RANBP2,RPN1,STAT3,TKT,TPI1,TPR,TYMS,VCP,NUP214,GMPS,NCOR1,SLC25A13,PAICS,NAGK,NUP133,DCAKD
5_Member	GO Biological Processes	GO:0006732	coenzyme metabolic process	-9.48784	-7.50118	28/407	38,47,191,226,471,1738,2023,2033,2194,2618,3939,4191,4200,4522,5223,5315,5903,6774,7086,7167,7175,7298,7415,8021,9611,55746,60496,79877	ACAT1,ACLY,AHCY,ALDOA,ATIC,DLD,ENO1,EP300,FASN,GART,LDHA,MDH2,ME2,MTHFD1,PGAM1,PKM,RANBP2,STAT3,TKT,TPI1,TPR,TYMS,VCP,NUP214,NCOR1,NUP133,AASDHPPT,DCAKD
5_Member	GO Biological Processes	GO:0006165	nucleoside diphosphate phosphorylation	-9.02694	-7.08258	16/134	226,2023,2033,3939,4830,4832,4833,5223,5315,5903,6774,7167,7175,8021,9611,55746	ALDOA,ENO1,EP300,LDHA,NME1,NME3,NME4,PGAM1,PKM,RANBP2,STAT3,TPI1,TPR,NUP214,NCOR1,NUP133
5_Member	GO Biological Processes	GO:0006090	pyruvate metabolic process	-8.97315	-7.03244	17/155	226,1738,2023,2033,3939,3945,4200,5223,5315,5903,6774,7167,7175,7416,8021,9611,55746	ALDOA,DLD,ENO1,EP300,LDHA,LDHB,ME2,PGAM1,PKM,RANBP2,STAT3,TPI1,TPR,VDAC1,NUP214,NCOR1,NUP133
5_Member	GO Biological Processes	GO:0046939	nucleotide phosphorylation	-8.931	-6.9975	16/136	226,2023,2033,3939,4830,4832,4833,5223,5315,5903,6774,7167,7175,8021,9611,55746	ALDOA,ENO1,EP300,LDHA,NME1,NME3,NME4,PGAM1,PKM,RANBP2,STAT3,TPI1,TPR,NUP214,NCOR1,NUP133
5_Member	GO Biological Processes	GO:0009132	nucleoside diphosphate metabolic process	-8.80117	-6.88174	17/159	204,226,2023,2033,3939,4830,4832,4833,5223,5315,5903,6774,7167,7175,8021,9611,55746	AK2,ALDOA,ENO1,EP300,LDHA,NME1,NME3,NME4,PGAM1,PKM,RANBP2,STAT3,TPI1,TPR,NUP214,NCOR1,NUP133
5_Member	GO Biological Processes	GO:0009108	coenzyme biosynthetic process	-8.47474	-6.58052	21/260	38,47,226,471,1738,2023,2033,2194,2618,3939,4522,5223,5315,5903,6774,7167,7175,8021,9611,55746,79877	ACAT1,ACLY,ALDOA,ATIC,DLD,ENO1,EP300,FASN,GART,LDHA,MTHFD1,PGAM1,PKM,RANBP2,STAT3,TPI1,TPR,NUP214,NCOR1,NUP133,DCAKD
5_Member	GO Biological Processes	GO:0051186	cofactor metabolic process	-8.42189	-6.53414	33/609	38,47,191,226,471,1738,2023,2033,2194,2618,3313,3939,4191,4200,4522,5052,5223,5315,5903,6774,7086,7167,7175,7298,7415,8021,9588,9611,10935,55746,56898,60496,79877	ACAT1,ACLY,AHCY,ALDOA,ATIC,DLD,ENO1,EP300,FASN,GART,HSPA9,LDHA,MDH2,ME2,MTHFD1,PRDX1,PGAM1,PKM,RANBP2,STAT3,TKT,TPI1,TPR,TYMS,VCP,NUP214,PRDX6,NCOR1,PRDX3,NUP133,BDH2,AASDHPPT,DCAKD
5_Member	GO Biological Processes	GO:0019362	pyridine nucleotide metabolic process	-8.36058	-6.48238	18/192	226,1738,2023,2033,3939,4191,4200,5223,5315,5903,6774,7086,7167,7175,7415,8021,9611,55746	ALDOA,DLD,ENO1,EP300,LDHA,MDH2,ME2,PGAM1,PKM,RANBP2,STAT3,TKT,TPI1,TPR,VCP,NUP214,NCOR1,NUP133
5_Member	GO Biological Processes	GO:0046496	nicotinamide nucleotide metabolic process	-8.36058	-6.48238	18/192	226,1738,2023,2033,3939,4191,4200,5223,5315,5903,6774,7086,7167,7175,7415,8021,9611,55746	ALDOA,DLD,ENO1,EP300,LDHA,MDH2,ME2,PGAM1,PKM,RANBP2,STAT3,TKT,TPI1,TPR,VCP,NUP214,NCOR1,NUP133
5_Member	GO Biological Processes	GO:0072524	pyridine-containing compound metabolic process	-8.11402	-6.25815	18/199	226,1738,2023,2033,3939,4191,4200,5223,5315,5903,6774,7086,7167,7175,7415,8021,9611,55746	ALDOA,DLD,ENO1,EP300,LDHA,MDH2,ME2,PGAM1,PKM,RANBP2,STAT3,TKT,TPI1,TPR,VCP,NUP214,NCOR1,NUP133
5_Member	GO Biological Processes	GO:0046034	ATP metabolic process	-7.91896	-6.08415	22/306	204,226,498,506,509,539,1738,2023,2033,3939,5223,5315,5903,6774,7167,7175,7415,8021,9611,10165,29789,55746	AK2,ALDOA,ATP5F1A,ATP5F1B,ATP5F1C,ATP5PO,DLD,ENO1,EP300,LDHA,PGAM1,PKM,RANBP2,STAT3,TPI1,TPR,VCP,NUP214,NCOR1,SLC25A13,OLA1,NUP133
5_Member	GO Biological Processes	GO:0006733	oxidoreduction coenzyme metabolic process	-7.71555	-5.90832	18/211	226,1738,2023,2033,3939,4191,4200,5223,5315,5903,6774,7086,7167,7175,7415,8021,9611,55746	ALDOA,DLD,ENO1,EP300,LDHA,MDH2,ME2,PGAM1,PKM,RANBP2,STAT3,TKT,TPI1,TPR,VCP,NUP214,NCOR1,NUP133
5_Member	GO Biological Processes	GO:0046031	ADP metabolic process	-7.52441	-5.72514	14/127	204,226,2023,2033,3939,5223,5315,5903,6774,7167,7175,8021,9611,55746	AK2,ALDOA,ENO1,EP300,LDHA,PGAM1,PKM,RANBP2,STAT3,TPI1,TPR,NUP214,NCOR1,NUP133
5_Member	GO Biological Processes	GO:0051188	cofactor biosynthetic process	-7.47315	-5.67779	22/324	38,47,226,471,1738,2023,2033,2194,2618,3939,4522,5223,5315,5903,6774,7167,7175,8021,9611,55746,56898,79877	ACAT1,ACLY,ALDOA,ATIC,DLD,ENO1,EP300,FASN,GART,LDHA,MTHFD1,PGAM1,PKM,RANBP2,STAT3,TPI1,TPR,NUP214,NCOR1,NUP133,BDH2,DCAKD
5_Member	Reactome Gene Sets	R-HSA-70326	Glucose metabolism	-7.40809	-5.62046	12/91	226,2023,4191,5223,5315,5903,7167,7175,8021,8402,10165,55746	ALDOA,ENO1,MDH2,PGAM1,PKM,RANBP2,TPI1,TPR,NUP214,SLC25A11,SLC25A13,NUP133
5_Member	GO Biological Processes	GO:0006096	glycolytic process	-7.16045	-5.39885	13/115	226,2023,2033,3939,5223,5315,5903,6774,7167,7175,8021,9611,55746	ALDOA,ENO1,EP300,LDHA,PGAM1,PKM,RANBP2,STAT3,TPI1,TPR,NUP214,NCOR1,NUP133
5_Member	GO Biological Processes	GO:0006091	generation of precursor metabolites and energy	-7.13182	-5.37262	28/522	38,226,498,506,509,539,1431,1738,2023,2033,3939,4191,4200,5223,5315,5903,6774,7167,7175,7415,8021,9611,10131,10165,11331,26227,55746,56898	ACAT1,ALDOA,ATP5F1A,ATP5F1B,ATP5F1C,ATP5PO,CS,DLD,ENO1,EP300,LDHA,MDH2,ME2,PGAM1,PKM,RANBP2,STAT3,TPI1,TPR,VCP,NUP214,NCOR1,TRAP1,SLC25A13,PHB2,PHGDH,NUP133,BDH2
5_Member	GO Biological Processes	GO:0006757	ATP generation from ADP	-7.11538	-5.35737	13/116	226,2023,2033,3939,5223,5315,5903,6774,7167,7175,8021,9611,55746	ALDOA,ENO1,EP300,LDHA,PGAM1,PKM,RANBP2,STAT3,TPI1,TPR,NUP214,NCOR1,NUP133
5_Member	GO Biological Processes	GO:0046394	carboxylic acid biosynthetic process	-7.06755	-5.31429	26/462	47,226,301,471,790,1213,2023,2033,2171,2194,2618,3939,4048,4522,5223,5315,5832,5903,6774,7167,7175,8021,9611,26227,55746,60496	ACLY,ALDOA,ANXA1,ATIC,CAD,CLTC,ENO1,EP300,FABP5,FASN,GART,LDHA,LTA4H,MTHFD1,PGAM1,PKM,ALDH18A1,RANBP2,STAT3,TPI1,TPR,NUP214,NCOR1,PHGDH,NUP133,AASDHPPT
5_Member	GO Biological Processes	GO:0016053	organic acid biosynthetic process	-7.04908	-5.29818	26/463	47,226,301,471,790,1213,2023,2033,2171,2194,2618,3939,4048,4522,5223,5315,5832,5903,6774,7167,7175,8021,9611,26227,55746,60496	ACLY,ALDOA,ANXA1,ATIC,CAD,CLTC,ENO1,EP300,FABP5,FASN,GART,LDHA,LTA4H,MTHFD1,PGAM1,PKM,ALDH18A1,RANBP2,STAT3,TPI1,TPR,NUP214,NCOR1,PHGDH,NUP133,AASDHPPT
5_Member	GO Biological Processes	GO:0009166	nucleotide catabolic process	-7.04021	-5.29164	16/184	38,226,2023,2033,3251,3939,5223,5315,5903,6774,7167,7175,7415,8021,9611,55746	ACAT1,ALDOA,ENO1,EP300,HPRT1,LDHA,PGAM1,PKM,RANBP2,STAT3,TPI1,TPR,VCP,NUP214,NCOR1,NUP133
5_Member	GO Biological Processes	GO:0009135	purine nucleoside diphosphate metabolic process	-7.02544	-5.28037	14/139	204,226,2023,2033,3939,5223,5315,5903,6774,7167,7175,8021,9611,55746	AK2,ALDOA,ENO1,EP300,LDHA,PGAM1,PKM,RANBP2,STAT3,TPI1,TPR,NUP214,NCOR1,NUP133
5_Member	GO Biological Processes	GO:0009179	purine ribonucleoside diphosphate metabolic process	-7.02544	-5.28037	14/139	204,226,2023,2033,3939,5223,5315,5903,6774,7167,7175,8021,9611,55746	AK2,ALDOA,ENO1,EP300,LDHA,PGAM1,PKM,RANBP2,STAT3,TPI1,TPR,NUP214,NCOR1,NUP133
5_Member	GO Biological Processes	GO:0042866	pyruvate biosynthetic process	-6.98293	-5.24017	13/119	226,2023,2033,3939,5223,5315,5903,6774,7167,7175,8021,9611,55746	ALDOA,ENO1,EP300,LDHA,PGAM1,PKM,RANBP2,STAT3,TPI1,TPR,NUP214,NCOR1,NUP133
5_Member	GO Biological Processes	GO:0009185	ribonucleoside diphosphate metabolic process	-6.9474	-5.20922	14/141	204,226,2023,2033,3939,5223,5315,5903,6774,7167,7175,8021,9611,55746	AK2,ALDOA,ENO1,EP300,LDHA,PGAM1,PKM,RANBP2,STAT3,TPI1,TPR,NUP214,NCOR1,NUP133
5_Member	GO Biological Processes	GO:0046364	monosaccharide biosynthetic process	-6.94445	-5.20741	12/100	226,1642,2023,2033,4191,5223,5903,7086,7167,7874,8402,10165	ALDOA,DDB1,ENO1,EP300,MDH2,PGAM1,RANBP2,TKT,TPI1,USP7,SLC25A11,SLC25A13
5_Member	GO Biological Processes	GO:1901292	nucleoside phosphate catabolic process	-6.84733	-5.1204	16/190	38,226,2023,2033,3251,3939,5223,5315,5903,6774,7167,7175,7415,8021,9611,55746	ACAT1,ALDOA,ENO1,EP300,HPRT1,LDHA,PGAM1,PKM,RANBP2,STAT3,TPI1,TPR,VCP,NUP214,NCOR1,NUP133
5_Member	KEGG Pathway	hsa00010	Glycolysis / Gluconeogenesis	-6.78894	-5.06971	10/67	223,226,501,1738,2023,3939,3945,5223,5315,7167	ALDH9A1,ALDOA,ALDH7A1,DLD,ENO1,LDHA,LDHB,PGAM1,PKM,TPI1
5_Member	GO Biological Processes	GO:0006094	gluconeogenesis	-6.44739	-4.75871	11/91	226,1642,2023,2033,4191,5223,5903,7167,7874,8402,10165	ALDOA,DDB1,ENO1,EP300,MDH2,PGAM1,RANBP2,TPI1,USP7,SLC25A11,SLC25A13
5_Member	KEGG Pathway	hsa01230	Biosynthesis of amino acids	-6.31648	-4.63686	10/75	226,501,1431,2023,5223,5315,5832,7086,7167,26227	ALDOA,ALDH7A1,CS,ENO1,PGAM1,PKM,ALDH18A1,TKT,TPI1,PHGDH
5_Member	KEGG Pathway	hsa01200	Carbon metabolism	-6.31491	-4.63629	12/114	38,226,1431,1738,2023,4191,4200,5223,5315,7086,7167,26227	ACAT1,ALDOA,CS,DLD,ENO1,MDH2,ME2,PGAM1,PKM,TKT,TPI1,PHGDH
5_Member	GO Biological Processes	GO:0019319	hexose biosynthetic process	-6.30283	-4.62915	11/94	226,1642,2023,2033,4191,5223,5903,7167,7874,8402,10165	ALDOA,DDB1,ENO1,EP300,MDH2,PGAM1,RANBP2,TPI1,USP7,SLC25A11,SLC25A13
5_Member	GO Biological Processes	GO:0046434	organophosphate catabolic process	-5.9416	-4.30555	17/249	38,226,2023,2033,3251,3939,5223,5315,5903,6774,7167,7175,7415,8021,9588,9611,55746	ACAT1,ALDOA,ENO1,EP300,HPRT1,LDHA,PGAM1,PKM,RANBP2,STAT3,TPI1,TPR,VCP,NUP214,PRDX6,NCOR1,NUP133
5_Member	GO Biological Processes	GO:0019359	nicotinamide nucleotide biosynthetic process	-5.91515	-4.28358	13/147	226,2023,2033,3939,5223,5315,5903,6774,7167,7175,8021,9611,55746	ALDOA,ENO1,EP300,LDHA,PGAM1,PKM,RANBP2,STAT3,TPI1,TPR,NUP214,NCOR1,NUP133
5_Member	GO Biological Processes	GO:0019363	pyridine nucleotide biosynthetic process	-5.91515	-4.28358	13/147	226,2023,2033,3939,5223,5315,5903,6774,7167,7175,8021,9611,55746	ALDOA,ENO1,EP300,LDHA,PGAM1,PKM,RANBP2,STAT3,TPI1,TPR,NUP214,NCOR1,NUP133
5_Member	Reactome Gene Sets	R-HSA-70263	Gluconeogenesis	-5.89753	-4.27127	7/34	226,2023,4191,5223,7167,8402,10165	ALDOA,ENO1,MDH2,PGAM1,TPI1,SLC25A11,SLC25A13
5_Member	GO Biological Processes	GO:0072525	pyridine-containing compound biosynthetic process	-5.81581	-4.19741	13/150	226,2023,2033,3939,5223,5315,5903,6774,7167,7175,8021,9611,55746	ALDOA,ENO1,EP300,LDHA,PGAM1,PKM,RANBP2,STAT3,TPI1,TPR,NUP214,NCOR1,NUP133
5_Member	Reactome Gene Sets	R-HSA-70171	Glycolysis	-5.554	-3.95588	9/71	226,2023,5223,5315,5903,7167,7175,8021,55746	ALDOA,ENO1,PGAM1,PKM,RANBP2,TPI1,TPR,NUP214,NUP133
5_Member	GO Biological Processes	GO:2001169	regulation of ATP biosynthetic process	-5.27716	-3.70546	10/97	2023,2033,5223,5903,6774,7175,7415,8021,9611,55746	ENO1,EP300,PGAM1,RANBP2,STAT3,TPR,VCP,NUP214,NCOR1,NUP133
5_Member	GO Biological Processes	GO:0006734	NADH metabolic process	-5.24729	-3.68329	7/42	226,2023,4191,5223,5315,7167,7415	ALDOA,ENO1,MDH2,PGAM1,PKM,TPI1,VCP
5_Member	GO Biological Processes	GO:0072330	monocarboxylic acid biosynthetic process	-4.6961	-3.18656	18/341	47,226,301,2023,2033,2171,2194,3939,4048,5223,5315,5903,6774,7167,7175,8021,9611,55746	ACLY,ALDOA,ANXA1,ENO1,EP300,FABP5,FASN,LDHA,LTA4H,PGAM1,PKM,RANBP2,STAT3,TPI1,TPR,NUP214,NCOR1,NUP133
5_Member	GO Biological Processes	GO:1900371	regulation of purine nucleotide biosynthetic process	-4.52285	-3.03111	10/118	2023,2033,5223,5903,6774,7175,7415,8021,9611,55746	ENO1,EP300,PGAM1,RANBP2,STAT3,TPR,VCP,NUP214,NCOR1,NUP133
5_Member	GO Biological Processes	GO:0030808	regulation of nucleotide biosynthetic process	-4.49114	-3.00327	10/119	2023,2033,5223,5903,6774,7175,7415,8021,9611,55746	ENO1,EP300,PGAM1,RANBP2,STAT3,TPR,VCP,NUP214,NCOR1,NUP133
5_Member	GO Biological Processes	GO:0051196	regulation of coenzyme metabolic process	-4.47271	-2.98867	9/96	2033,4200,5223,5903,6774,7175,8021,9611,55746	EP300,ME2,PGAM1,RANBP2,STAT3,TPR,NUP214,NCOR1,NUP133
5_Member	KEGG Pathway	M00002	Glycolysis, core module involving three-carbon compounds	-4.46458	-2.98302	4/12	2023,5223,5315,7167	ENO1,PGAM1,PKM,TPI1
5_Member	KEGG Pathway	hsa_M00002	Glycolysis, core module involving three-carbon compounds	-4.46458	-2.98302	4/12	2023,5223,5315,7167	ENO1,PGAM1,PKM,TPI1
5_Member	GO Biological Processes	GO:0016052	carbohydrate catabolic process	-4.4584	-2.97814	13/200	226,2023,2033,3939,5223,5315,5903,6774,7167,7175,8021,9611,55746	ALDOA,ENO1,EP300,LDHA,PGAM1,PKM,RANBP2,STAT3,TPI1,TPR,NUP214,NCOR1,NUP133
5_Member	GO Biological Processes	GO:0006140	regulation of nucleotide metabolic process	-4.35809	-2.88963	11/149	2023,2033,4200,5223,5903,6774,7175,7415,8021,9611,55746	ENO1,EP300,ME2,PGAM1,RANBP2,STAT3,TPR,VCP,NUP214,NCOR1,NUP133
5_Member	GO Biological Processes	GO:0032787	monocarboxylic acid metabolic process	-4.35793	-2.88963	26/651	38,47,226,301,1738,2023,2033,2171,2194,3939,3945,4048,4200,5223,5315,5903,6774,7167,7175,7416,8021,9611,26227,55746,56898,60496	ACAT1,ACLY,ALDOA,ANXA1,DLD,ENO1,EP300,FABP5,FASN,LDHA,LDHB,LTA4H,ME2,PGAM1,PKM,RANBP2,STAT3,TPI1,TPR,VDAC1,NUP214,NCOR1,PHGDH,NUP133,BDH2,AASDHPPT
5_Member	GO Biological Processes	GO:0019674	NAD metabolic process	-4.35748	-2.88963	8/77	226,2023,3939,4191,5223,5315,7167,7415	ALDOA,ENO1,LDHA,MDH2,PGAM1,PKM,TPI1,VCP
5_Member	GO Biological Processes	GO:1903578	regulation of ATP metabolic process	-4.33748	-2.8751	10/124	2023,2033,5223,5903,6774,7175,7415,8021,9611,55746	ENO1,EP300,PGAM1,RANBP2,STAT3,TPR,VCP,NUP214,NCOR1,NUP133
5_Member	KEGG Pathway	M00001	Glycolysis (Embden-Meyerhof pathway), glucose => pyruvate	-4.28848	-2.83388	5/25	226,2023,5223,5315,7167	ALDOA,ENO1,PGAM1,PKM,TPI1
5_Member	KEGG Pathway	hsa_M00001	Glycolysis (Embden-Meyerhof pathway), glucose => pyruvate	-4.28848	-2.83388	5/25	226,2023,5223,5315,7167	ALDOA,ENO1,PGAM1,PKM,TPI1
5_Member	GO Biological Processes	GO:0006110	regulation of glycolytic process	-4.23727	-2.78739	8/80	2033,5223,5903,6774,7175,8021,9611,55746	EP300,PGAM1,RANBP2,STAT3,TPR,NUP214,NCOR1,NUP133
5_Member	GO Biological Processes	GO:0005975	carbohydrate metabolic process	-4.17812	-2.73407	25/629	226,1213,1431,1642,2023,2033,2171,3939,3945,4191,5223,5315,5903,6774,7086,7167,7175,7874,8021,8402,9611,10165,23193,55577,55746	ALDOA,CLTC,CS,DDB1,ENO1,EP300,FABP5,LDHA,LDHB,MDH2,PGAM1,PKM,RANBP2,STAT3,TKT,TPI1,TPR,USP7,NUP214,SLC25A11,NCOR1,SLC25A13,GANAB,NAGK,NUP133
5_Member	GO Biological Processes	GO:0006006	glucose metabolic process	-4.17668	-2.73322	13/213	226,1642,2023,2033,2171,4191,5223,5315,5903,7167,7874,8402,10165	ALDOA,DDB1,ENO1,EP300,FABP5,MDH2,PGAM1,PKM,RANBP2,TPI1,USP7,SLC25A11,SLC25A13
5_Member	GO Biological Processes	GO:0016051	carbohydrate biosynthetic process	-4.15597	-2.71539	13/214	226,1213,1642,2023,2033,4191,5223,5903,7086,7167,7874,8402,10165	ALDOA,CLTC,DDB1,ENO1,EP300,MDH2,PGAM1,RANBP2,TKT,TPI1,USP7,SLC25A11,SLC25A13
5_Member	GO Biological Processes	GO:0030811	regulation of nucleotide catabolic process	-4.1224	-2.68354	8/83	2033,5223,5903,6774,7175,8021,9611,55746	EP300,PGAM1,RANBP2,STAT3,TPR,NUP214,NCOR1,NUP133
5_Member	GO Biological Processes	GO:0006735	NADH regeneration	-4.11873	-2.68328	5/27	226,2023,5223,5315,7167	ALDOA,ENO1,PGAM1,PKM,TPI1
5_Member	GO Biological Processes	GO:0061621	canonical glycolysis	-4.11873	-2.68328	5/27	226,2023,5223,5315,7167	ALDOA,ENO1,PGAM1,PKM,TPI1
5_Member	GO Biological Processes	GO:0061718	glucose catabolic process to pyruvate	-4.11873	-2.68328	5/27	226,2023,5223,5315,7167	ALDOA,ENO1,PGAM1,PKM,TPI1
5_Member	GO Biological Processes	GO:0043467	regulation of generation of precursor metabolites and energy	-4.10168	-2.66737	11/159	2033,5223,5903,6774,7175,7415,8021,9611,10131,11331,55746	EP300,PGAM1,RANBP2,STAT3,TPR,VCP,NUP214,NCOR1,TRAP1,PHB2,NUP133
5_Member	GO Biological Processes	GO:0061620	glycolytic process through glucose-6-phosphate	-4.03927	-2.61834	5/28	226,2023,5223,5315,7167	ALDOA,ENO1,PGAM1,PKM,TPI1
5_Member	GO Biological Processes	GO:0061615	glycolytic process through fructose-6-phosphate	-3.96305	-2.55028	5/29	226,2023,5223,5315,7167	ALDOA,ENO1,PGAM1,PKM,TPI1
5_Member	GO Biological Processes	GO:0043470	regulation of carbohydrate catabolic process	-3.87304	-2.46616	8/90	2033,5223,5903,6774,7175,8021,9611,55746	EP300,PGAM1,RANBP2,STAT3,TPR,NUP214,NCOR1,NUP133
5_Member	KEGG Pathway	M00003	Gluconeogenesis, oxaloacetate => fructose-6P	-3.81142	-2.41087	4/17	226,2023,5223,7167	ALDOA,ENO1,PGAM1,TPI1
5_Member	KEGG Pathway	hsa_M00003	Gluconeogenesis, oxaloacetate => fructose-6P	-3.81142	-2.41087	4/17	226,2023,5223,7167	ALDOA,ENO1,PGAM1,TPI1
5_Member	GO Biological Processes	GO:1900542	regulation of purine nucleotide metabolic process	-3.76853	-2.37006	10/145	2023,2033,5223,5903,6774,7175,7415,8021,9611,55746	ENO1,EP300,PGAM1,RANBP2,STAT3,TPR,VCP,NUP214,NCOR1,NUP133
5_Member	GO Biological Processes	GO:0051193	regulation of cofactor metabolic process	-3.69144	-2.30125	9/121	2033,4200,5223,5903,6774,7175,8021,9611,55746	EP300,ME2,PGAM1,RANBP2,STAT3,TPR,NUP214,NCOR1,NUP133
5_Member	GO Biological Processes	GO:0006007	glucose catabolic process	-3.50308	-2.13385	5/36	226,2023,5223,5315,7167	ALDOA,ENO1,PGAM1,PKM,TPI1
5_Member	GO Biological Processes	GO:0019318	hexose metabolic process	-3.43871	-2.0796	13/253	226,1642,2023,2033,2171,4191,5223,5315,5903,7167,7874,8402,10165	ALDOA,DDB1,ENO1,EP300,FABP5,MDH2,PGAM1,PKM,RANBP2,TPI1,USP7,SLC25A11,SLC25A13
5_Member	GO Biological Processes	GO:0005996	monosaccharide metabolic process	-3.3119	-1.965	14/295	226,1642,2023,2033,2171,4191,5223,5315,5903,7086,7167,7874,8402,10165	ALDOA,DDB1,ENO1,EP300,FABP5,MDH2,PGAM1,PKM,RANBP2,TKT,TPI1,USP7,SLC25A11,SLC25A13
5_Member	Reactome Gene Sets	R-HSA-71387	Metabolism of carbohydrates	-3.3119	-1.965	14/295	226,2023,4191,5223,5315,5903,7086,7167,7175,7314,8021,8402,10165,55746	ALDOA,ENO1,MDH2,PGAM1,PKM,RANBP2,TKT,TPI1,TPR,UBB,NUP214,SLC25A11,SLC25A13,NUP133
5_Member	GO Biological Processes	GO:0006109	regulation of carbohydrate metabolic process	-3.09641	-1.776	11/208	1213,1642,2033,5223,5903,6774,7175,7874,8021,9611,55746	CLTC,DDB1,EP300,PGAM1,RANBP2,STAT3,TPR,USP7,NUP214,NCOR1,NUP133
5_Member	GO Biological Processes	GO:0009435	NAD biosynthetic process	-2.61588	-1.36422	5/56	226,2023,5223,5315,7167	ALDOA,ENO1,PGAM1,PKM,TPI1
5_Member	GO Biological Processes	GO:0019320	hexose catabolic process	-2.58191	-1.33284	5/57	226,2023,5223,5315,7167	ALDOA,ENO1,PGAM1,PKM,TPI1
5_Member	GO Biological Processes	GO:0046365	monosaccharide catabolic process	-2.27779	-1.07463	5/67	226,2023,5223,5315,7167	ALDOA,ENO1,PGAM1,PKM,TPI1
5_Member	GO Biological Processes	GO:0019682	glyceraldehyde-3-phosphate metabolic process	-2.24821	-1.04968	3/22	5223,7086,7167	PGAM1,TKT,TPI1
5_Member	GO Biological Processes	GO:0006081	cellular aldehyde metabolic process	-2.04882	-0.879853	5/76	223,501,5223,7086,7167	ALDH9A1,ALDH7A1,PGAM1,TKT,TPI1
6_Summary	GO Biological Processes	GO:0006457	protein folding	-18.6219	-16.2271	31/228	908,3301,3309,3313,3315,3329,3337,5034,5478,5700,5903,6905,6950,7184,7203,7266,7411,7415,9531,10130,10131,10574,10575,10576,10694,10726,10808,22824,22948,23193,55898,2033,3308,7094,9217,10399,6184,6748,55968,1654,1981,5706,9131,81542	CCT6A,DNAJA1,HSPA5,HSPA9,HSPB1,HSPD1,DNAJB1,P4HB,PPIA,PSMC1,RANBP2,TBCE,TCP1,HSP90B1,CCT3,DNAJC7,VBP1,VCP,BAG3,PDIA6,TRAP1,CCT7,CCT4,CCT2,CCT8,NUDC,HSPH1,HSPA4L,CCT5,GANAB,UNC45A,EP300,HSPA4,TLN1,VAPB,RACK1,RPN1,SSR4,NSFL1C,DDX3X,EIF4G1,PSMC6,AIFM1,TMX1
6_Member	GO Biological Processes	GO:0006457	protein folding	-18.6219	-16.2271	31/228	908,3301,3309,3313,3315,3329,3337,5034,5478,5700,5903,6905,6950,7184,7203,7266,7411,7415,9531,10130,10131,10574,10575,10576,10694,10726,10808,22824,22948,23193,55898	CCT6A,DNAJA1,HSPA5,HSPA9,HSPB1,HSPD1,DNAJB1,P4HB,PPIA,PSMC1,RANBP2,TBCE,TCP1,HSP90B1,CCT3,DNAJC7,VBP1,VCP,BAG3,PDIA6,TRAP1,CCT7,CCT4,CCT2,CCT8,NUDC,HSPH1,HSPA4L,CCT5,GANAB,UNC45A
6_Member	GO Biological Processes	GO:0006986	response to unfolded protein	-7.90553	-6.07357	17/182	2033,3301,3308,3309,3313,3315,3329,3337,7094,7184,7415,9217,9531,10130,10399,10808,22824	EP300,DNAJA1,HSPA4,HSPA5,HSPA9,HSPB1,HSPD1,DNAJB1,TLN1,HSP90B1,VCP,VAPB,BAG3,PDIA6,RACK1,HSPH1,HSPA4L
6_Member	GO Biological Processes	GO:0035966	response to topologically incorrect protein	-7.17126	-5.40711	17/204	2033,3301,3308,3309,3313,3315,3329,3337,7094,7184,7415,9217,9531,10130,10399,10808,22824	EP300,DNAJA1,HSPA4,HSPA5,HSPA9,HSPB1,HSPD1,DNAJB1,TLN1,HSP90B1,VCP,VAPB,BAG3,PDIA6,RACK1,HSPH1,HSPA4L
6_Member	KEGG Pathway	hsa04141	Protein processing in endoplasmic reticulum	-5.3251	-3.75028	13/166	3301,3309,3337,5034,6184,6748,7184,7415,10130,10808,22824,23193,55968	DNAJA1,HSPA5,DNAJB1,P4HB,RPN1,SSR4,HSP90B1,VCP,PDIA6,HSPH1,HSPA4L,GANAB,NSFL1C
6_Member	GO Biological Processes	GO:0034620	cellular response to unfolded protein	-3.76853	-2.37006	10/145	2033,3309,3313,7094,7184,7415,9217,9531,10130,10399	EP300,HSPA5,HSPA9,TLN1,HSP90B1,VCP,VAPB,BAG3,PDIA6,RACK1
6_Member	GO Biological Processes	GO:0034976	response to endoplasmic reticulum stress	-3.34121	-1.99245	14/293	1654,1981,2033,3309,5034,5706,7094,7184,7415,9131,9217,10130,10399,81542	DDX3X,EIF4G1,EP300,HSPA5,P4HB,PSMC6,TLN1,HSP90B1,VCP,AIFM1,VAPB,PDIA6,RACK1,TMX1
6_Member	GO Biological Processes	GO:0035967	cellular response to topologically incorrect protein	-3.33882	-1.99052	10/164	2033,3309,3313,7094,7184,7415,9217,9531,10130,10399	EP300,HSPA5,HSPA9,TLN1,HSP90B1,VCP,VAPB,BAG3,PDIA6,RACK1
6_Member	GO Biological Processes	GO:0030968	endoplasmic reticulum unfolded protein response	-2.91131	-1.61256	8/125	2033,3309,7094,7184,7415,9217,10130,10399	EP300,HSPA5,TLN1,HSP90B1,VCP,VAPB,PDIA6,RACK1
7_Summary	GO Biological Processes	GO:0006417	regulation of translation	-18.1569	-15.7723	41/444	1153,1653,1654,1660,1981,1982,1983,1984,2058,3184,3315,4691,5036,5594,5725,5976,6125,6134,6169,6176,6188,6191,6203,6208,6774,7175,7298,7431,8570,8663,9470,10128,10131,10399,10492,10985,23019,23521,26058,26986,54464,5223	CIRBP,DDX1,DDX3X,DHX9,EIF4G1,EIF4G2,EIF5,EIF5A,EPRS1,HNRNPD,HSPB1,NCL,PA2G4,MAPK1,PTBP1,UPF1,RPL5,RPL10,RPL38,RPLP1,RPS3,RPS4X,RPS9,RPS14,STAT3,TPR,TYMS,VIM,KHSRP,EIF3C,EIF4E2,LRPPRC,TRAP1,RACK1,SYNCRIP,GCN1,CNOT1,RPL13A,GIGYF2,PABPC1,XRN1,PGAM1
7_Member	GO Biological Processes	GO:0006417	regulation of translation	-18.1569	-15.7723	41/444	1153,1653,1654,1660,1981,1982,1983,1984,2058,3184,3315,4691,5036,5594,5725,5976,6125,6134,6169,6176,6188,6191,6203,6208,6774,7175,7298,7431,8570,8663,9470,10128,10131,10399,10492,10985,23019,23521,26058,26986,54464	CIRBP,DDX1,DDX3X,DHX9,EIF4G1,EIF4G2,EIF5,EIF5A,EPRS1,HNRNPD,HSPB1,NCL,PA2G4,MAPK1,PTBP1,UPF1,RPL5,RPL10,RPL38,RPLP1,RPS3,RPS4X,RPS9,RPS14,STAT3,TPR,TYMS,VIM,KHSRP,EIF3C,EIF4E2,LRPPRC,TRAP1,RACK1,SYNCRIP,GCN1,CNOT1,RPL13A,GIGYF2,PABPC1,XRN1
7_Member	GO Biological Processes	GO:0034248	regulation of cellular amide metabolic process	-16.8946	-14.5393	42/506	1153,1653,1654,1660,1981,1982,1983,1984,2058,3184,3315,4691,5036,5223,5594,5725,5976,6125,6134,6169,6176,6188,6191,6203,6208,6774,7175,7298,7431,8570,8663,9470,10128,10131,10399,10492,10985,23019,23521,26058,26986,54464	CIRBP,DDX1,DDX3X,DHX9,EIF4G1,EIF4G2,EIF5,EIF5A,EPRS1,HNRNPD,HSPB1,NCL,PA2G4,PGAM1,MAPK1,PTBP1,UPF1,RPL5,RPL10,RPL38,RPLP1,RPS3,RPS4X,RPS9,RPS14,STAT3,TPR,TYMS,VIM,KHSRP,EIF3C,EIF4E2,LRPPRC,TRAP1,RACK1,SYNCRIP,GCN1,CNOT1,RPL13A,GIGYF2,PABPC1,XRN1
7_Member	GO Biological Processes	GO:0017148	negative regulation of translation	-8.33034	-6.45839	19/216	1153,1654,1981,2058,3184,4691,5976,6188,6774,7175,7298,8570,9470,10399,10492,23019,23521,26058,54464	CIRBP,DDX3X,EIF4G1,EPRS1,HNRNPD,NCL,UPF1,RPS3,STAT3,TPR,TYMS,KHSRP,EIF4E2,RACK1,SYNCRIP,CNOT1,RPL13A,GIGYF2,XRN1
7_Member	GO Biological Processes	GO:0034249	negative regulation of cellular amide metabolic process	-7.70126	-5.89538	19/236	1153,1654,1981,2058,3184,4691,5976,6188,6774,7175,7298,8570,9470,10399,10492,23019,23521,26058,54464	CIRBP,DDX3X,EIF4G1,EPRS1,HNRNPD,NCL,UPF1,RPS3,STAT3,TPR,TYMS,KHSRP,EIF4E2,RACK1,SYNCRIP,CNOT1,RPL13A,GIGYF2,XRN1
7_Member	GO Biological Processes	GO:0045727	positive regulation of translation	-6.4526	-4.76291	13/132	1153,1654,1660,1981,1984,3184,5594,6125,6191,6203,7431,8663,26986	CIRBP,DDX3X,DHX9,EIF4G1,EIF5A,HNRNPD,MAPK1,RPL5,RPS4X,RPS9,VIM,EIF3C,PABPC1
7_Member	GO Biological Processes	GO:0034250	positive regulation of cellular amide metabolic process	-6.26805	-4.59828	14/160	1153,1654,1660,1981,1984,3184,5594,6125,6191,6203,7431,8663,10399,26986	CIRBP,DDX3X,DHX9,EIF4G1,EIF5A,HNRNPD,MAPK1,RPL5,RPS4X,RPS9,VIM,EIF3C,RACK1,PABPC1
8_Summary	GO Biological Processes	GO:0032204	regulation of telomere maintenance	-14.9017	-12.5912	18/81	908,3178,3181,3184,3192,4361,5514,5594,5976,6950,7203,7874,10574,10575,10576,10694,22948,54464,2547,5111,5591,121504,1500,1828,2033,2316,3054,3329,5216,5245,6125,6135,6201,9531,11331,1387,7175,57646,5478,7298,7314,7415,56897,301,375,1072,1778,2017,2810,6188,6421,7531,7534,9520,9793,10015,10075,10971,23019,23476,55968,57175,1660,2521,3008,3836,3838,9131,9320,26057,27101,226,760,3315,4057,5052,1117…	CCT6A,HNRNPA1,HNRNPA2B1,HNRNPD,HNRNPU,MRE11,PPP1R10,MAPK1,UPF1,TCP1,CCT3,USP7,CCT7,CCT4,CCT2,CCT8,CCT5,XRN1,XRCC6,PCNA,PRKDC,H4-16,CTNND1,DSG1,EP300,FLNA,HCFC1,HSPD1,PFN1,PHB,RPL5,RPL11,RPS7,BAG3,PHB2,CREBBP,TPR,USP28,PPIA,TYMS,UBB,VCP,WRNIP1,ANXA1,ARF1,CFL1,DYNC1H1,CTTN,SFN,RPS3,SFPQ,YWHAE,YWHAZ,NPEPPS,CKAP5,PDCD6IP,HUWE1,YWHAQ,CNOT1,BRD4,NSFL1C,CORO1B,DHX9,FUS,H1-4,KPNA1,KPNA2,AIFM1,TRIP12,ANKR…
8_Member	GO Biological Processes	GO:0032204	regulation of telomere maintenance	-14.9017	-12.5912	18/81	908,3178,3181,3184,3192,4361,5514,5594,5976,6950,7203,7874,10574,10575,10576,10694,22948,54464	CCT6A,HNRNPA1,HNRNPA2B1,HNRNPD,HNRNPU,MRE11,PPP1R10,MAPK1,UPF1,TCP1,CCT3,USP7,CCT7,CCT4,CCT2,CCT8,CCT5,XRN1
8_Member	CORUM	CORUM:126	CCT complex (chaperonin containing TCP1 complex)	-14.2429	-11.9652	8/8	908,6950,7203,10574,10575,10576,10694,22948	CCT6A,TCP1,CCT3,CCT7,CCT4,CCT2,CCT8,CCT5
8_Member	GO Biological Processes	GO:0000723	telomere maintenance	-13.3531	-11.1095	22/162	908,2547,3178,3181,3184,3192,4361,5111,5514,5591,5594,5976,6950,7203,7874,10574,10575,10576,10694,22948,54464,121504	CCT6A,XRCC6,HNRNPA1,HNRNPA2B1,HNRNPD,HNRNPU,MRE11,PCNA,PPP1R10,PRKDC,MAPK1,UPF1,TCP1,CCT3,USP7,CCT7,CCT4,CCT2,CCT8,CCT5,XRN1,H4-16
8_Member	GO Biological Processes	GO:1904869	regulation of protein localization to Cajal body	-13.2951	-11.0623	8/9	908,6950,7203,10574,10575,10576,10694,22948	CCT6A,TCP1,CCT3,CCT7,CCT4,CCT2,CCT8,CCT5
8_Member	GO Biological Processes	GO:1904871	positive regulation of protein localization to Cajal body	-13.2951	-11.0623	8/9	908,6950,7203,10574,10575,10576,10694,22948	CCT6A,TCP1,CCT3,CCT7,CCT4,CCT2,CCT8,CCT5
8_Member	GO Biological Processes	GO:0032206	positive regulation of telomere maintenance	-13.1028	-10.8806	14/51	908,3178,3181,3184,4361,5514,5594,6950,7203,10574,10575,10576,10694,22948	CCT6A,HNRNPA1,HNRNPA2B1,HNRNPD,MRE11,PPP1R10,MAPK1,TCP1,CCT3,CCT7,CCT4,CCT2,CCT8,CCT5
8_Member	GO Biological Processes	GO:0032200	telomere organization	-12.6515	-10.4659	22/175	908,2547,3178,3181,3184,3192,4361,5111,5514,5591,5594,5976,6950,7203,7874,10574,10575,10576,10694,22948,54464,121504	CCT6A,XRCC6,HNRNPA1,HNRNPA2B1,HNRNPD,HNRNPU,MRE11,PCNA,PPP1R10,PRKDC,MAPK1,UPF1,TCP1,CCT3,USP7,CCT7,CCT4,CCT2,CCT8,CCT5,XRN1,H4-16
8_Member	GO Biological Processes	GO:1903405	protein localization to nuclear body	-12.6025	-10.4326	8/10	908,6950,7203,10574,10575,10576,10694,22948	CCT6A,TCP1,CCT3,CCT7,CCT4,CCT2,CCT8,CCT5
8_Member	GO Biological Processes	GO:1904851	positive regulation of establishment of protein localization to telomere	-12.6025	-10.4326	8/10	908,6950,7203,10574,10575,10576,10694,22948	CCT6A,TCP1,CCT3,CCT7,CCT4,CCT2,CCT8,CCT5
8_Member	GO Biological Processes	GO:1904867	protein localization to Cajal body	-12.6025	-10.4326	8/10	908,6950,7203,10574,10575,10576,10694,22948	CCT6A,TCP1,CCT3,CCT7,CCT4,CCT2,CCT8,CCT5
8_Member	Reactome Gene Sets	R-HSA-390450	Folding of actin by CCT/TriC	-12.6025	-10.4326	8/10	908,6950,7203,10574,10575,10576,10694,22948	CCT6A,TCP1,CCT3,CCT7,CCT4,CCT2,CCT8,CCT5
8_Member	GO Biological Processes	GO:0050821	protein stabilization	-12.1531	-10.0043	22/185	908,1500,1828,2033,2316,3054,3329,5216,5245,6125,6135,6201,6950,7203,7874,9531,10574,10575,10576,10694,11331,22948	CCT6A,CTNND1,DSG1,EP300,FLNA,HCFC1,HSPD1,PFN1,PHB,RPL5,RPL11,RPS7,TCP1,CCT3,USP7,BAG3,CCT7,CCT4,CCT2,CCT8,PHB2,CCT5
8_Member	GO Biological Processes	GO:0031647	regulation of protein stability	-12.1461	-10.0002	27/291	908,1387,1500,1828,2033,2316,3054,3329,5216,5245,5591,5594,6125,6135,6201,6950,7175,7203,7874,9531,10574,10575,10576,10694,11331,22948,57646	CCT6A,CREBBP,CTNND1,DSG1,EP300,FLNA,HCFC1,HSPD1,PFN1,PHB,PRKDC,MAPK1,RPL5,RPL11,RPS7,TCP1,TPR,CCT3,USP7,BAG3,CCT7,CCT4,CCT2,CCT8,PHB2,CCT5,USP28
8_Member	GO Biological Processes	GO:0070203	regulation of establishment of protein localization to telomere	-12.0446	-9.9158	8/11	908,6950,7203,10574,10575,10576,10694,22948	CCT6A,TCP1,CCT3,CCT7,CCT4,CCT2,CCT8,CCT5
8_Member	GO Biological Processes	GO:0070202	regulation of establishment of protein localization to chromosome	-11.5738	-9.46957	8/12	908,6950,7203,10574,10575,10576,10694,22948	CCT6A,TCP1,CCT3,CCT7,CCT4,CCT2,CCT8,CCT5
8_Member	GO Biological Processes	GO:1904816	positive regulation of protein localization to chromosome, telomeric region	-11.5738	-9.46957	8/12	908,6950,7203,10574,10575,10576,10694,22948	CCT6A,TCP1,CCT3,CCT7,CCT4,CCT2,CCT8,CCT5
8_Member	GO Biological Processes	GO:1990173	protein localization to nucleoplasm	-11.5738	-9.46957	8/12	908,6950,7203,10574,10575,10576,10694,22948	CCT6A,TCP1,CCT3,CCT7,CCT4,CCT2,CCT8,CCT5
8_Member	GO Biological Processes	GO:0071897	DNA biosynthetic process	-11.4201	-9.32628	22/201	908,3178,3181,3184,3192,4361,5111,5245,5478,5594,6950,7203,7298,7314,7415,10574,10575,10576,10694,22948,54464,56897	CCT6A,HNRNPA1,HNRNPA2B1,HNRNPD,HNRNPU,MRE11,PCNA,PHB,PPIA,MAPK1,TCP1,CCT3,TYMS,UBB,VCP,CCT7,CCT4,CCT2,CCT8,CCT5,XRN1,WRNIP1
8_Member	GO Biological Processes	GO:1904358	positive regulation of telomere maintenance via telomere lengthening	-10.8394	-8.77553	11/37	908,3178,3181,5594,6950,7203,10574,10575,10576,10694,22948	CCT6A,HNRNPA1,HNRNPA2B1,MAPK1,TCP1,CCT3,CCT7,CCT4,CCT2,CCT8,CCT5
8_Member	GO Biological Processes	GO:1904814	regulation of protein localization to chromosome, telomeric region	-10.8036	-8.7422	8/14	908,6950,7203,10574,10575,10576,10694,22948	CCT6A,TCP1,CCT3,CCT7,CCT4,CCT2,CCT8,CCT5
8_Member	GO Biological Processes	GO:0010638	positive regulation of organelle organization	-10.7592	-8.70017	38/641	301,375,908,1072,1778,2017,2316,2810,3178,3181,3184,3192,4361,5216,5514,5594,6188,6421,6950,7175,7203,7531,7534,9520,9793,10015,10075,10574,10575,10576,10694,10971,11331,22948,23019,23476,55968,57175	ANXA1,ARF1,CCT6A,CFL1,DYNC1H1,CTTN,FLNA,SFN,HNRNPA1,HNRNPA2B1,HNRNPD,HNRNPU,MRE11,PFN1,PPP1R10,MAPK1,RPS3,SFPQ,TCP1,TPR,CCT3,YWHAE,YWHAZ,NPEPPS,CKAP5,PDCD6IP,HUWE1,CCT7,CCT4,CCT2,CCT8,YWHAQ,PHB2,CCT5,CNOT1,BRD4,NSFL1C,CORO1B
8_Member	GO Biological Processes	GO:0051052	regulation of DNA metabolic process	-10.5874	-8.53074	31/445	908,1660,2521,3008,3178,3181,3184,3192,3836,3838,4361,5111,5514,5591,5594,5976,6188,6950,7203,7874,9131,9320,10574,10575,10576,10694,22948,26057,27101,54464,56897	CCT6A,DHX9,FUS,H1-4,HNRNPA1,HNRNPA2B1,HNRNPD,HNRNPU,KPNA1,KPNA2,MRE11,PCNA,PPP1R10,PRKDC,MAPK1,UPF1,RPS3,TCP1,CCT3,USP7,AIFM1,TRIP12,CCT7,CCT4,CCT2,CCT8,CCT5,ANKRD17,CACYBP,XRN1,WRNIP1
8_Member	GO Biological Processes	GO:1904356	regulation of telomere maintenance via telomere lengthening	-10.5823	-8.52802	13/62	908,3178,3181,3192,5594,6950,7203,10574,10575,10576,10694,22948,54464	CCT6A,HNRNPA1,HNRNPA2B1,HNRNPU,MAPK1,TCP1,CCT3,CCT7,CCT4,CCT2,CCT8,CCT5,XRN1
8_Member	GO Biological Processes	GO:1904874	positive regulation of telomerase RNA localization to Cajal body	-10.479	-8.43636	8/15	908,6950,7203,10574,10575,10576,10694,22948	CCT6A,TCP1,CCT3,CCT7,CCT4,CCT2,CCT8,CCT5
8_Member	GO Biological Processes	GO:0006278	RNA-dependent DNA biosynthetic process	-10.4613	-8.42093	14/77	908,3178,3192,4361,5478,5594,6950,7203,10574,10575,10576,10694,22948,54464	CCT6A,HNRNPA1,HNRNPU,MRE11,PPIA,MAPK1,TCP1,CCT3,CCT7,CCT4,CCT2,CCT8,CCT5,XRN1
8_Member	GO Biological Processes	GO:0070200	establishment of protein localization to telomere	-10.1843	-8.15304	8/16	908,6950,7203,10574,10575,10576,10694,22948	CCT6A,TCP1,CCT3,CCT7,CCT4,CCT2,CCT8,CCT5
8_Member	GO Biological Processes	GO:0032210	regulation of telomere maintenance via telomerase	-10.13	-8.10314	12/54	908,3178,3192,5594,6950,7203,10574,10575,10576,10694,22948,54464	CCT6A,HNRNPA1,HNRNPU,MAPK1,TCP1,CCT3,CCT7,CCT4,CCT2,CCT8,CCT5,XRN1
8_Member	GO Biological Processes	GO:0060249	anatomical structure homeostasis	-10.1063	-8.08383	30/437	226,760,908,2547,3178,3181,3184,3192,3315,4057,4361,5052,5111,5514,5591,5594,5976,6950,7203,7874,9531,10574,10575,10576,10694,11171,22948,26058,54464,121504	ALDOA,CA2,CCT6A,XRCC6,HNRNPA1,HNRNPA2B1,HNRNPD,HNRNPU,HSPB1,LTF,MRE11,PRDX1,PCNA,PPP1R10,PRKDC,MAPK1,UPF1,TCP1,CCT3,USP7,BAG3,CCT7,CCT4,CCT2,CCT8,STRAP,CCT5,GIGYF2,XRN1,H4-16
8_Member	GO Biological Processes	GO:0010833	telomere maintenance via telomere lengthening	-10.0763	-8.05824	14/82	908,3178,3181,3192,4361,5594,6950,7203,10574,10575,10576,10694,22948,54464	CCT6A,HNRNPA1,HNRNPA2B1,HNRNPU,MRE11,MAPK1,TCP1,CCT3,CCT7,CCT4,CCT2,CCT8,CCT5,XRN1
8_Member	GO Biological Processes	GO:2000573	positive regulation of DNA biosynthetic process	-9.96062	-7.94686	13/69	908,3178,3181,3184,5111,5594,6950,7203,10574,10575,10576,10694,22948	CCT6A,HNRNPA1,HNRNPA2B1,HNRNPD,PCNA,MAPK1,TCP1,CCT3,CCT7,CCT4,CCT2,CCT8,CCT5
8_Member	GO Biological Processes	GO:0007004	telomere maintenance via telomerase	-9.87796	-7.86635	13/70	908,3178,3192,4361,5594,6950,7203,10574,10575,10576,10694,22948,54464	CCT6A,HNRNPA1,HNRNPU,MRE11,MAPK1,TCP1,CCT3,CCT7,CCT4,CCT2,CCT8,CCT5,XRN1
8_Member	GO Biological Processes	GO:0032212	positive regulation of telomere maintenance via telomerase	-9.8523	-7.84387	10/34	908,3178,5594,6950,7203,10574,10575,10576,10694,22948	CCT6A,HNRNPA1,MAPK1,TCP1,CCT3,CCT7,CCT4,CCT2,CCT8,CCT5
8_Member	GO Biological Processes	GO:1904872	regulation of telomerase RNA localization to Cajal body	-9.6656	-7.66872	8/18	908,6950,7203,10574,10575,10576,10694,22948	CCT6A,TCP1,CCT3,CCT7,CCT4,CCT2,CCT8,CCT5
8_Member	GO Biological Processes	GO:0007339	binding of sperm to zona pellucida	-9.44743	-7.46479	10/37	226,6950,7203,7417,9898,10574,10575,10576,10694,22948	ALDOA,TCP1,CCT3,VDAC2,UBAP2L,CCT7,CCT4,CCT2,CCT8,CCT5
8_Member	GO Biological Processes	GO:0090670	RNA localization to Cajal body	-9.43461	-7.4599	8/19	908,6950,7203,10574,10575,10576,10694,22948	CCT6A,TCP1,CCT3,CCT7,CCT4,CCT2,CCT8,CCT5
8_Member	GO Biological Processes	GO:0090671	telomerase RNA localization to Cajal body	-9.43461	-7.4599	8/19	908,6950,7203,10574,10575,10576,10694,22948	CCT6A,TCP1,CCT3,CCT7,CCT4,CCT2,CCT8,CCT5
8_Member	GO Biological Processes	GO:0090672	telomerase RNA localization	-9.43461	-7.4599	8/19	908,6950,7203,10574,10575,10576,10694,22948	CCT6A,TCP1,CCT3,CCT7,CCT4,CCT2,CCT8,CCT5
8_Member	GO Biological Processes	GO:0090685	RNA localization to nucleus	-9.43461	-7.4599	8/19	908,6950,7203,10574,10575,10576,10694,22948	CCT6A,TCP1,CCT3,CCT7,CCT4,CCT2,CCT8,CCT5
8_Member	Reactome Gene Sets	R-HSA-389957	Prefoldin mediated transfer of substrate to CCT/TriC	-9.31109	-7.34029	9/28	908,6950,7203,7411,10574,10575,10576,10694,22948	CCT6A,TCP1,CCT3,VBP1,CCT7,CCT4,CCT2,CCT8,CCT5
8_Member	GO Biological Processes	GO:0051054	positive regulation of DNA metabolic process	-9.20297	-7.2418	21/237	908,1660,2521,3178,3181,3184,4361,5111,5514,5591,5594,6188,6950,7203,7874,10574,10575,10576,10694,22948,27101	CCT6A,DHX9,FUS,HNRNPA1,HNRNPA2B1,HNRNPD,MRE11,PCNA,PPP1R10,PRKDC,MAPK1,RPS3,TCP1,CCT3,USP7,CCT7,CCT4,CCT2,CCT8,CCT5,CACYBP
8_Member	GO Biological Processes	GO:2000278	regulation of DNA biosynthetic process	-9.09674	-7.1487	15/114	908,3178,3181,3184,3192,5111,5594,6950,7203,10574,10575,10576,10694,22948,54464	CCT6A,HNRNPA1,HNRNPA2B1,HNRNPD,HNRNPU,PCNA,MAPK1,TCP1,CCT3,CCT7,CCT4,CCT2,CCT8,CCT5,XRN1
8_Member	Reactome Gene Sets	R-HSA-389958	Cooperation of Prefoldin and TriC/CCT in actin and tubulin folding	-8.72817	-6.81389	9/32	908,6950,7203,7411,10574,10575,10576,10694,22948	CCT6A,TCP1,CCT3,VBP1,CCT7,CCT4,CCT2,CCT8,CCT5
8_Member	GO Biological Processes	GO:2001252	positive regulation of chromosome organization	-8.65638	-6.7489	18/184	908,3178,3181,3184,3192,4361,5514,5594,6421,6950,7175,7203,10574,10575,10576,10694,22948,23476	CCT6A,HNRNPA1,HNRNPA2B1,HNRNPD,HNRNPU,MRE11,PPP1R10,MAPK1,SFPQ,TCP1,TPR,CCT3,CCT7,CCT4,CCT2,CCT8,CCT5,BRD4
8_Member	CORUM	CORUM:6247	BBS-chaperonin complex	-8.37828	-6.49692	6/10	6950,7203,10575,10576,10694,22948	TCP1,CCT3,CCT4,CCT2,CCT8,CCT5
8_Member	GO Biological Processes	GO:0070199	establishment of protein localization to chromosome	-8.31716	-6.4483	8/25	908,6950,7203,10574,10575,10576,10694,22948	CCT6A,TCP1,CCT3,CCT7,CCT4,CCT2,CCT8,CCT5
8_Member	Reactome Gene Sets	R-HSA-389960	Formation of tubulin folding intermediates by CCT/TriC	-8.31716	-6.4483	8/25	908,6950,7203,10574,10575,10576,10694,22948	CCT6A,TCP1,CCT3,CCT7,CCT4,CCT2,CCT8,CCT5
8_Member	GO Biological Processes	GO:1901998	toxin transport	-8.11336	-6.25815	9/37	3309,6950,7203,9276,10574,10575,10576,10694,22948	HSPA5,TCP1,CCT3,COPB2,CCT7,CCT4,CCT2,CCT8,CCT5
8_Member	GO Biological Processes	GO:0035036	sperm-egg recognition	-7.97356	-6.13302	10/51	226,6950,7203,7417,9898,10574,10575,10576,10694,22948	ALDOA,TCP1,CCT3,VDAC2,UBAP2L,CCT7,CCT4,CCT2,CCT8,CCT5
8_Member	GO Biological Processes	GO:0033044	regulation of chromosome organization	-7.96934	-6.13024	24/359	908,3008,3178,3181,3184,3192,4361,5514,5594,5976,6421,6950,7175,7203,7874,9320,10574,10575,10576,10694,22948,23476,54464,54908	CCT6A,H1-4,HNRNPA1,HNRNPA2B1,HNRNPD,HNRNPU,MRE11,PPP1R10,MAPK1,UPF1,SFPQ,TCP1,TPR,CCT3,USP7,TRIP12,CCT7,CCT4,CCT2,CCT8,CCT5,BRD4,XRN1,SPDL1
8_Member	Reactome Gene Sets	R-HSA-390471	Association of TriC/CCT with target proteins during biosynthesis	-7.89487	-6.06785	9/39	908,6774,6950,7203,10574,10575,10576,10694,22948	CCT6A,STAT3,TCP1,CCT3,CCT7,CCT4,CCT2,CCT8,CCT5
8_Member	GO Biological Processes	GO:0070198	protein localization to chromosome, telomeric region	-7.74398	-5.93407	8/29	908,6950,7203,10574,10575,10576,10694,22948	CCT6A,TCP1,CCT3,CCT7,CCT4,CCT2,CCT8,CCT5
8_Member	GO Biological Processes	GO:0009988	cell-cell recognition	-6.48631	-4.79149	10/72	226,6950,7203,7417,9898,10574,10575,10576,10694,22948	ALDOA,TCP1,CCT3,VDAC2,UBAP2L,CCT7,CCT4,CCT2,CCT8,CCT5
8_Member	Reactome Gene Sets	R-HSA-6814122	Cooperation of PDCL (PhLP1) and TRiC/CCT in G-protein beta folding	-6.38721	-4.70158	8/42	908,6950,7203,10574,10575,10576,10694,22948	CCT6A,TCP1,CCT3,CCT7,CCT4,CCT2,CCT8,CCT5
8_Member	Reactome Gene Sets	R-HSA-391251	Protein folding	-5.98611	-4.34552	11/101	908,6774,6905,6950,7203,7411,10574,10575,10576,10694,22948	CCT6A,STAT3,TBCE,TCP1,CCT3,VBP1,CCT7,CCT4,CCT2,CCT8,CCT5
8_Member	GO Biological Processes	GO:0034502	protein localization to chromosome	-5.90055	-4.27332	10/83	908,6950,7203,10574,10575,10576,10694,22948,54908,57082	CCT6A,TCP1,CCT3,CCT7,CCT4,CCT2,CCT8,CCT5,SPDL1,KNL1
8_Member	Reactome Gene Sets	R-HSA-5620922	BBSome-mediated cargo-targeting to cilium	-5.77651	-4.16667	6/23	6950,7203,10575,10576,10694,22948	TCP1,CCT3,CCT4,CCT2,CCT8,CCT5
8_Member	Reactome Gene Sets	R-HSA-1852241	Organelle biogenesis and maintenance	-5.53627	-3.94144	18/296	498,506,509,539,1387,1778,3054,3313,3842,6950,7203,7531,9611,9793,10575,10576,10694,22948	ATP5F1A,ATP5F1B,ATP5F1C,ATP5PO,CREBBP,DYNC1H1,HCFC1,HSPA9,TNPO1,TCP1,CCT3,YWHAE,NCOR1,CKAP5,CCT4,CCT2,CCT8,CCT5
8_Member	Reactome Gene Sets	R-HSA-390466	Chaperonin-mediated protein folding	-5.35931	-3.77978	10/95	908,6774,6950,7203,7411,10574,10575,10576,10694,22948	CCT6A,STAT3,TCP1,CCT3,VBP1,CCT7,CCT4,CCT2,CCT8,CCT5
8_Member	GO Biological Processes	GO:0051973	positive regulation of telomerase activity	-4.57087	-3.07589	6/36	3181,3184,5594,6950,10575,10576	HNRNPA2B1,HNRNPD,MAPK1,TCP1,CCT4,CCT2
8_Member	GO Biological Processes	GO:0007338	single fertilization	-4.35809	-2.88963	11/149	226,1399,6950,7203,7417,9898,10574,10575,10576,10694,22948	ALDOA,CRKL,TCP1,CCT3,VDAC2,UBAP2L,CCT7,CCT4,CCT2,CCT8,CCT5
8_Member	GO Biological Processes	GO:0090666	scaRNA localization to Cajal body	-4.34399	-2.88101	3/5	6950,10575,10576	TCP1,CCT4,CCT2
8_Member	GO Biological Processes	GO:0051972	regulation of telomerase activity	-3.69663	-2.30541	6/51	3181,3184,5594,6950,10575,10576	HNRNPA2B1,HNRNPD,MAPK1,TCP1,CCT4,CCT2
8_Member	Reactome Gene Sets	R-HSA-5620920	Cargo trafficking to the periciliary membrane	-3.69663	-2.30541	6/51	6950,7203,10575,10576,10694,22948	TCP1,CCT3,CCT4,CCT2,CCT8,CCT5
8_Member	GO Biological Processes	GO:0009566	fertilization	-3.564	-2.1864	11/183	226,1399,6950,7203,7417,9898,10574,10575,10576,10694,22948	ALDOA,CRKL,TCP1,CCT3,VDAC2,UBAP2L,CCT7,CCT4,CCT2,CCT8,CCT5
8_Member	GO Biological Processes	GO:0008037	cell recognition	-2.93066	-1.62775	11/218	226,6950,7203,7417,7534,9898,10574,10575,10576,10694,22948	ALDOA,TCP1,CCT3,VDAC2,YWHAZ,UBAP2L,CCT7,CCT4,CCT2,CCT8,CCT5
8_Member	Reactome Gene Sets	R-HSA-5617833	Cilium Assembly	-2.66788	-1.40398	10/201	1778,3842,6950,7203,7531,9793,10575,10576,10694,22948	DYNC1H1,TNPO1,TCP1,CCT3,YWHAE,CKAP5,CCT4,CCT2,CCT8,CCT5
9_Summary	CORUM	CORUM:5380	TRBP containing complex (DICER, RPL7A, EIF6, MOV10 and subunits of the 60S ribosomal particle)	-14.7594	-12.4615	12/25	6129,6130,6135,6136,6137,6138,6142,6144,6155,6158,6165,6176	RPL7,RPL7A,RPL11,RPL12,RPL13,RPL15,RPL18A,RPL21,RPL27,RPL28,RPL35A,RPLP1
9_Member	CORUM	CORUM:5380	TRBP containing complex (DICER, RPL7A, EIF6, MOV10 and subunits of the 60S ribosomal particle)	-14.7594	-12.4615	12/25	6129,6130,6135,6136,6137,6138,6142,6144,6155,6158,6165,6176	RPL7,RPL7A,RPL11,RPL12,RPL13,RPL15,RPL18A,RPL21,RPL27,RPL28,RPL35A,RPLP1
10_Summary	Reactome Gene Sets	R-HSA-6798695	Neutrophil degranulation	-14.643	-12.3532	38/480	47,226,1476,1654,1667,1778,1823,1828,2171,2547,2665,3614,3615,3728,3837,4048,4057,5036,5223,5315,5317,5478,5594,5707,5708,5718,6279,6280,7414,7415,7879,9588,10075,10576,10694,51552,55832,388697,1653,81,87,308,375,2316,4627,7094,8407,29789,301,3329,6774	ACLY,ALDOA,CSTB,DDX3X,DEFA1,DYNC1H1,DSC1,DSG1,FABP5,XRCC6,GDI2,IMPDH1,IMPDH2,JUP,KPNB1,LTA4H,LTF,PA2G4,PGAM1,PKM,PKP1,PPIA,MAPK1,PSMD1,PSMD2,PSMD12,S100A8,S100A9,VCL,VCP,RAB7A,PRDX6,HUWE1,CCT2,CCT8,RAB14,CAND1,HRNR,DDX1,ACTN4,ACTN1,ANXA5,ARF1,FLNA,MYH9,TLN1,TAGLN2,OLA1,ANXA1,HSPD1,STAT3
10_Member	Reactome Gene Sets	R-HSA-6798695	Neutrophil degranulation	-14.643	-12.3532	38/480	47,226,1476,1654,1667,1778,1823,1828,2171,2547,2665,3614,3615,3728,3837,4048,4057,5036,5223,5315,5317,5478,5594,5707,5708,5718,6279,6280,7414,7415,7879,9588,10075,10576,10694,51552,55832,388697	ACLY,ALDOA,CSTB,DDX3X,DEFA1,DYNC1H1,DSC1,DSG1,FABP5,XRCC6,GDI2,IMPDH1,IMPDH2,JUP,KPNB1,LTA4H,LTF,PA2G4,PGAM1,PKM,PKP1,PPIA,MAPK1,PSMD1,PSMD2,PSMD12,S100A8,S100A9,VCL,VCP,RAB7A,PRDX6,HUWE1,CCT2,CCT8,RAB14,CAND1,HRNR
10_Member	GO Biological Processes	GO:0043312	neutrophil degranulation	-14.4116	-12.1259	38/488	47,226,1476,1654,1667,1778,1823,1828,2171,2547,2665,3614,3615,3728,3837,4048,4057,5036,5223,5315,5317,5478,5594,5707,5708,5718,6279,6280,7414,7415,7879,9588,10075,10576,10694,51552,55832,388697	ACLY,ALDOA,CSTB,DDX3X,DEFA1,DYNC1H1,DSC1,DSG1,FABP5,XRCC6,GDI2,IMPDH1,IMPDH2,JUP,KPNB1,LTA4H,LTF,PA2G4,PGAM1,PKM,PKP1,PPIA,MAPK1,PSMD1,PSMD2,PSMD12,S100A8,S100A9,VCL,VCP,RAB7A,PRDX6,HUWE1,CCT2,CCT8,RAB14,CAND1,HRNR
10_Member	GO Biological Processes	GO:0002283	neutrophil activation involved in immune response	-14.3261	-12.0444	38/491	47,226,1476,1654,1667,1778,1823,1828,2171,2547,2665,3614,3615,3728,3837,4048,4057,5036,5223,5315,5317,5478,5594,5707,5708,5718,6279,6280,7414,7415,7879,9588,10075,10576,10694,51552,55832,388697	ACLY,ALDOA,CSTB,DDX3X,DEFA1,DYNC1H1,DSC1,DSG1,FABP5,XRCC6,GDI2,IMPDH1,IMPDH2,JUP,KPNB1,LTA4H,LTF,PA2G4,PGAM1,PKM,PKP1,PPIA,MAPK1,PSMD1,PSMD2,PSMD12,S100A8,S100A9,VCL,VCP,RAB7A,PRDX6,HUWE1,CCT2,CCT8,RAB14,CAND1,HRNR
10_Member	GO Biological Processes	GO:0042119	neutrophil activation	-14.0458	-11.772	38/501	47,226,1476,1654,1667,1778,1823,1828,2171,2547,2665,3614,3615,3728,3837,4048,4057,5036,5223,5315,5317,5478,5594,5707,5708,5718,6279,6280,7414,7415,7879,9588,10075,10576,10694,51552,55832,388697	ACLY,ALDOA,CSTB,DDX3X,DEFA1,DYNC1H1,DSC1,DSG1,FABP5,XRCC6,GDI2,IMPDH1,IMPDH2,JUP,KPNB1,LTA4H,LTF,PA2G4,PGAM1,PKM,PKP1,PPIA,MAPK1,PSMD1,PSMD2,PSMD12,S100A8,S100A9,VCL,VCP,RAB7A,PRDX6,HUWE1,CCT2,CCT8,RAB14,CAND1,HRNR
10_Member	GO Biological Processes	GO:0002446	neutrophil mediated immunity	-14.0182	-11.7483	38/502	47,226,1476,1654,1667,1778,1823,1828,2171,2547,2665,3614,3615,3728,3837,4048,4057,5036,5223,5315,5317,5478,5594,5707,5708,5718,6279,6280,7414,7415,7879,9588,10075,10576,10694,51552,55832,388697	ACLY,ALDOA,CSTB,DDX3X,DEFA1,DYNC1H1,DSC1,DSG1,FABP5,XRCC6,GDI2,IMPDH1,IMPDH2,JUP,KPNB1,LTA4H,LTF,PA2G4,PGAM1,PKM,PKP1,PPIA,MAPK1,PSMD1,PSMD2,PSMD12,S100A8,S100A9,VCL,VCP,RAB7A,PRDX6,HUWE1,CCT2,CCT8,RAB14,CAND1,HRNR
10_Member	GO Biological Processes	GO:0036230	granulocyte activation	-13.8811	-11.6227	38/507	47,226,1476,1654,1667,1778,1823,1828,2171,2547,2665,3614,3615,3728,3837,4048,4057,5036,5223,5315,5317,5478,5594,5707,5708,5718,6279,6280,7414,7415,7879,9588,10075,10576,10694,51552,55832,388697	ACLY,ALDOA,CSTB,DDX3X,DEFA1,DYNC1H1,DSC1,DSG1,FABP5,XRCC6,GDI2,IMPDH1,IMPDH2,JUP,KPNB1,LTA4H,LTF,PA2G4,PGAM1,PKM,PKP1,PPIA,MAPK1,PSMD1,PSMD2,PSMD12,S100A8,S100A9,VCL,VCP,RAB7A,PRDX6,HUWE1,CCT2,CCT8,RAB14,CAND1,HRNR
10_Member	GO Biological Processes	GO:0002444	myeloid leukocyte mediated immunity	-13.3321	-11.0922	39/555	47,226,1476,1653,1654,1667,1778,1823,1828,2171,2547,2665,3614,3615,3728,3837,4048,4057,5036,5223,5315,5317,5478,5594,5707,5708,5718,6279,6280,7414,7415,7879,9588,10075,10576,10694,51552,55832,388697	ACLY,ALDOA,CSTB,DDX1,DDX3X,DEFA1,DYNC1H1,DSC1,DSG1,FABP5,XRCC6,GDI2,IMPDH1,IMPDH2,JUP,KPNB1,LTA4H,LTF,PA2G4,PGAM1,PKM,PKP1,PPIA,MAPK1,PSMD1,PSMD2,PSMD12,S100A8,S100A9,VCL,VCP,RAB7A,PRDX6,HUWE1,CCT2,CCT8,RAB14,CAND1,HRNR
10_Member	GO Biological Processes	GO:0045055	regulated exocytosis	-13.1745	-10.9453	47/796	47,81,87,226,308,375,1476,1654,1667,1778,1823,1828,2171,2316,2547,2665,3614,3615,3728,3837,4048,4057,4627,5036,5223,5315,5317,5478,5594,5707,5708,5718,6279,6280,7094,7414,7415,7879,8407,9588,10075,10576,10694,29789,51552,55832,388697	ACLY,ACTN4,ACTN1,ALDOA,ANXA5,ARF1,CSTB,DDX3X,DEFA1,DYNC1H1,DSC1,DSG1,FABP5,FLNA,XRCC6,GDI2,IMPDH1,IMPDH2,JUP,KPNB1,LTA4H,LTF,MYH9,PA2G4,PGAM1,PKM,PKP1,PPIA,MAPK1,PSMD1,PSMD2,PSMD12,S100A8,S100A9,TLN1,VCL,VCP,RAB7A,TAGLN2,PRDX6,HUWE1,CCT2,CCT8,OLA1,RAB14,CAND1,HRNR
10_Member	GO Biological Processes	GO:0043299	leukocyte degranulation	-13.0938	-10.8785	38/537	47,226,1476,1654,1667,1778,1823,1828,2171,2547,2665,3614,3615,3728,3837,4048,4057,5036,5223,5315,5317,5478,5594,5707,5708,5718,6279,6280,7414,7415,7879,9588,10075,10576,10694,51552,55832,388697	ACLY,ALDOA,CSTB,DDX3X,DEFA1,DYNC1H1,DSC1,DSG1,FABP5,XRCC6,GDI2,IMPDH1,IMPDH2,JUP,KPNB1,LTA4H,LTF,PA2G4,PGAM1,PKM,PKP1,PPIA,MAPK1,PSMD1,PSMD2,PSMD12,S100A8,S100A9,VCL,VCP,RAB7A,PRDX6,HUWE1,CCT2,CCT8,RAB14,CAND1,HRNR
10_Member	GO Biological Processes	GO:0002275	myeloid cell activation involved in immune response	-12.8441	-10.6488	38/547	47,226,1476,1654,1667,1778,1823,1828,2171,2547,2665,3614,3615,3728,3837,4048,4057,5036,5223,5315,5317,5478,5594,5707,5708,5718,6279,6280,7414,7415,7879,9588,10075,10576,10694,51552,55832,388697	ACLY,ALDOA,CSTB,DDX3X,DEFA1,DYNC1H1,DSC1,DSG1,FABP5,XRCC6,GDI2,IMPDH1,IMPDH2,JUP,KPNB1,LTA4H,LTF,PA2G4,PGAM1,PKM,PKP1,PPIA,MAPK1,PSMD1,PSMD2,PSMD12,S100A8,S100A9,VCL,VCP,RAB7A,PRDX6,HUWE1,CCT2,CCT8,RAB14,CAND1,HRNR
10_Member	GO Biological Processes	GO:0002366	leukocyte activation involved in immune response	-11.2006	-9.12209	41/711	47,226,301,1476,1654,1667,1778,1823,1828,2171,2547,2665,3329,3614,3615,3728,3837,4048,4057,5036,5223,5315,5317,5478,5594,5707,5708,5718,6279,6280,6774,7414,7415,7879,9588,10075,10576,10694,51552,55832,388697	ACLY,ALDOA,ANXA1,CSTB,DDX3X,DEFA1,DYNC1H1,DSC1,DSG1,FABP5,XRCC6,GDI2,HSPD1,IMPDH1,IMPDH2,JUP,KPNB1,LTA4H,LTF,PA2G4,PGAM1,PKM,PKP1,PPIA,MAPK1,PSMD1,PSMD2,PSMD12,S100A8,S100A9,STAT3,VCL,VCP,RAB7A,PRDX6,HUWE1,CCT2,CCT8,RAB14,CAND1,HRNR
10_Member	GO Biological Processes	GO:0002263	cell activation involved in immune response	-11.1241	-9.05048	41/715	47,226,301,1476,1654,1667,1778,1823,1828,2171,2547,2665,3329,3614,3615,3728,3837,4048,4057,5036,5223,5315,5317,5478,5594,5707,5708,5718,6279,6280,6774,7414,7415,7879,9588,10075,10576,10694,51552,55832,388697	ACLY,ALDOA,ANXA1,CSTB,DDX3X,DEFA1,DYNC1H1,DSC1,DSG1,FABP5,XRCC6,GDI2,HSPD1,IMPDH1,IMPDH2,JUP,KPNB1,LTA4H,LTF,PA2G4,PGAM1,PKM,PKP1,PPIA,MAPK1,PSMD1,PSMD2,PSMD12,S100A8,S100A9,STAT3,VCL,VCP,RAB7A,PRDX6,HUWE1,CCT2,CCT8,RAB14,CAND1,HRNR
10_Member	GO Biological Processes	GO:0002274	myeloid leukocyte activation	-11.0698	-8.99868	39/656	47,226,1476,1654,1667,1778,1823,1828,2171,2547,2665,3329,3614,3615,3728,3837,4048,4057,5036,5223,5315,5317,5478,5594,5707,5708,5718,6279,6280,7414,7415,7879,9588,10075,10576,10694,51552,55832,388697	ACLY,ALDOA,CSTB,DDX3X,DEFA1,DYNC1H1,DSC1,DSG1,FABP5,XRCC6,GDI2,HSPD1,IMPDH1,IMPDH2,JUP,KPNB1,LTA4H,LTF,PA2G4,PGAM1,PKM,PKP1,PPIA,MAPK1,PSMD1,PSMD2,PSMD12,S100A8,S100A9,VCL,VCP,RAB7A,PRDX6,HUWE1,CCT2,CCT8,RAB14,CAND1,HRNR
11_Summary	GO Biological Processes	GO:0006403	RNA localization	-13.4634	-11.2125	26/236	908,1660,1984,3178,3181,3192,5901,5903,5976,6421,6950,7175,7203,7514,8021,8570,9793,10128,10574,10575,10576,10694,22948,55746,57510,64062,1981,1982,1983,3837,5905,6606,8661,8663,8668,9470,11171,26986,728689,2316,2317,3836,3838,3839,7314,1434,2810,3313,7295,7531,9531,293,1478,1653,283742,1655,6774,9611,121504,2058,3028,1387,2033,3066,3190,5111,10521,3008,2547,5478,10015,6632,91754,5594,10051,10592…	CCT6A,DHX9,EIF5A,HNRNPA1,HNRNPA2B1,HNRNPU,RAN,RANBP2,UPF1,SFPQ,TCP1,TPR,CCT3,XPO1,NUP214,KHSRP,CKAP5,LRPPRC,CCT7,CCT4,CCT2,CCT8,CCT5,NUP133,XPO5,RBM26,EIF4G1,EIF4G2,EIF5,KPNB1,RANGAP1,SMN1,EIF3A,EIF3C,EIF3I,EIF4E2,STRAP,PABPC1,EIF3CL,FLNA,FLNB,KPNA1,KPNA2,KPNA3,UBB,CSE1L,SFN,HSPA9,TXN,YWHAE,BAG3,SLC25A6,CSTF2,DDX1,FAM98B,DDX5,STAT3,NCOR1,H4-16,EPRS1,HSD17B10,CREBBP,EP300,HDAC2,HNRNPK,PCNA,DDX17,H…
11_Member	GO Biological Processes	GO:0006403	RNA localization	-13.4634	-11.2125	26/236	908,1660,1984,3178,3181,3192,5901,5903,5976,6421,6950,7175,7203,7514,8021,8570,9793,10128,10574,10575,10576,10694,22948,55746,57510,64062	CCT6A,DHX9,EIF5A,HNRNPA1,HNRNPA2B1,HNRNPU,RAN,RANBP2,UPF1,SFPQ,TCP1,TPR,CCT3,XPO1,NUP214,KHSRP,CKAP5,LRPPRC,CCT7,CCT4,CCT2,CCT8,CCT5,NUP133,XPO5,RBM26
11_Member	KEGG Pathway	hsa03013	RNA transport	-11.9016	-9.7839	21/171	1981,1982,1983,3837,5901,5903,5905,5976,6606,7175,7514,8021,8661,8663,8668,9470,11171,26986,55746,57510,728689	EIF4G1,EIF4G2,EIF5,KPNB1,RAN,RANBP2,RANGAP1,UPF1,SMN1,TPR,XPO1,NUP214,EIF3A,EIF3C,EIF3I,EIF4E2,STRAP,PABPC1,NUP133,XPO5,EIF3CL
11_Member	Reactome Gene Sets	R-HSA-1169410	Antiviral mechanism by IFN-stimulated genes	-10.151	-8.12196	14/81	1981,1982,2316,2317,3836,3837,3838,3839,5903,7175,7314,8021,9470,55746	EIF4G1,EIF4G2,FLNA,FLNB,KPNA1,KPNB1,KPNA2,KPNA3,RANBP2,TPR,UBB,NUP214,EIF4E2,NUP133
11_Member	GO Biological Processes	GO:0051168	nuclear export	-9.6841	-7.68306	20/201	1434,1660,1984,2810,3178,3181,3313,5901,5903,5905,5976,7175,7295,7514,7531,8021,9531,55746,57510,64062	CSE1L,DHX9,EIF5A,SFN,HNRNPA1,HNRNPA2B1,HSPA9,RAN,RANBP2,RANGAP1,UPF1,TPR,TXN,XPO1,YWHAE,NUP214,BAG3,NUP133,XPO5,RBM26
11_Member	Reactome Gene Sets	R-HSA-1169408	ISG15 antiviral mechanism	-9.63817	-7.64334	13/73	1981,1982,2317,3836,3837,3838,3839,5903,7175,7314,8021,9470,55746	EIF4G1,EIF4G2,FLNB,KPNA1,KPNB1,KPNA2,KPNA3,RANBP2,TPR,UBB,NUP214,EIF4E2,NUP133
11_Member	GO Biological Processes	GO:0044766	multi-organism transport	-8.74303	-6.82704	12/70	3836,3837,3838,3839,5901,5903,6950,7175,7314,7514,8021,55746	KPNA1,KPNB1,KPNA2,KPNA3,RAN,RANBP2,TCP1,TPR,UBB,XPO1,NUP214,NUP133
11_Member	GO Biological Processes	GO:1902579	multi-organism localization	-8.74303	-6.82704	12/70	3836,3837,3838,3839,5901,5903,6950,7175,7314,7514,8021,55746	KPNA1,KPNB1,KPNA2,KPNA3,RAN,RANBP2,TCP1,TPR,UBB,XPO1,NUP214,NUP133
11_Member	GO Biological Processes	GO:0075733	intracellular transport of virus	-8.63555	-6.73308	11/57	3836,3837,3838,3839,5901,5903,7175,7314,7514,8021,55746	KPNA1,KPNB1,KPNA2,KPNA3,RAN,RANBP2,TPR,UBB,XPO1,NUP214,NUP133
11_Member	GO Biological Processes	GO:0046794	transport of virus	-8.38617	-6.50262	11/60	3836,3837,3838,3839,5901,5903,7175,7314,7514,8021,55746	KPNA1,KPNB1,KPNA2,KPNA3,RAN,RANBP2,TPR,UBB,XPO1,NUP214,NUP133
11_Member	GO Biological Processes	GO:0050657	nucleic acid transport	-8.11402	-6.25815	18/199	1660,1984,3178,3181,3192,5901,5903,5976,6421,7175,7514,8021,8570,9793,10128,55746,57510,64062	DHX9,EIF5A,HNRNPA1,HNRNPA2B1,HNRNPU,RAN,RANBP2,UPF1,SFPQ,TPR,XPO1,NUP214,KHSRP,CKAP5,LRPPRC,NUP133,XPO5,RBM26
11_Member	GO Biological Processes	GO:0050658	RNA transport	-8.11402	-6.25815	18/199	1660,1984,3178,3181,3192,5901,5903,5976,6421,7175,7514,8021,8570,9793,10128,55746,57510,64062	DHX9,EIF5A,HNRNPA1,HNRNPA2B1,HNRNPU,RAN,RANBP2,UPF1,SFPQ,TPR,XPO1,NUP214,KHSRP,CKAP5,LRPPRC,NUP133,XPO5,RBM26
11_Member	GO Biological Processes	GO:0051236	establishment of RNA localization	-8.01163	-6.1682	18/202	1660,1984,3178,3181,3192,5901,5903,5976,6421,7175,7514,8021,8570,9793,10128,55746,57510,64062	DHX9,EIF5A,HNRNPA1,HNRNPA2B1,HNRNPU,RAN,RANBP2,UPF1,SFPQ,TPR,XPO1,NUP214,KHSRP,CKAP5,LRPPRC,NUP133,XPO5,RBM26
11_Member	GO Biological Processes	GO:0006611	protein export from nucleus	-7.90553	-6.07357	17/182	1434,1984,2810,3181,3313,5901,5903,5905,5976,7175,7295,7514,7531,8021,9531,55746,57510	CSE1L,EIF5A,SFN,HNRNPA2B1,HSPA9,RAN,RANBP2,RANGAP1,UPF1,TPR,TXN,XPO1,YWHAE,NUP214,BAG3,NUP133,XPO5
11_Member	GO Biological Processes	GO:0015931	nucleobase-containing compound transport	-7.41156	-5.62137	19/246	293,1660,1984,3178,3181,3192,5901,5903,5976,6421,7175,7514,8021,8570,9793,10128,55746,57510,64062	SLC25A6,DHX9,EIF5A,HNRNPA1,HNRNPA2B1,HNRNPU,RAN,RANBP2,UPF1,SFPQ,TPR,XPO1,NUP214,KHSRP,CKAP5,LRPPRC,NUP133,XPO5,RBM26
11_Member	Reactome Gene Sets	R-HSA-177243	Interactions of Rev with host cellular proteins	-6.8408	-5.11498	8/37	3837,5901,5903,5905,7175,7514,8021,55746	KPNB1,RAN,RANBP2,RANGAP1,TPR,XPO1,NUP214,NUP133
11_Member	Reactome Gene Sets	R-HSA-168276	NS1 Mediated Effects on Host Pathways	-6.47264	-4.78192	8/41	3836,3837,3838,3839,5903,7175,8021,55746	KPNA1,KPNB1,KPNA2,KPNA3,RANBP2,TPR,NUP214,NUP133
11_Member	GO Biological Processes	GO:0006405	RNA export from nucleus	-6.08646	-4.43387	13/142	1660,1984,3178,3181,5901,5903,5976,7175,7514,8021,55746,57510,64062	DHX9,EIF5A,HNRNPA1,HNRNPA2B1,RAN,RANBP2,UPF1,TPR,XPO1,NUP214,NUP133,XPO5,RBM26
11_Member	Reactome Gene Sets	R-HSA-165054	Rev-mediated nuclear export of HIV RNA	-5.80687	-4.19079	7/35	5901,5903,5905,7175,7514,8021,55746	RAN,RANBP2,RANGAP1,TPR,XPO1,NUP214,NUP133
11_Member	Reactome Gene Sets	R-HSA-6784531	tRNA processing in the nucleus	-5.33613	-3.75896	8/57	1478,1653,5901,5903,7175,8021,55746,283742	CSTF2,DDX1,RAN,RANBP2,TPR,NUP214,NUP133,FAM98B
11_Member	GO Biological Processes	GO:0060147	regulation of posttranscriptional gene silencing	-5.31662	-3.74414	11/118	1655,1660,1981,5903,6774,7175,8021,9611,55746,57510,121504	DDX5,DHX9,EIF4G1,RANBP2,STAT3,TPR,NUP214,NCOR1,NUP133,XPO5,H4-16
11_Member	GO Biological Processes	GO:0060966	regulation of gene silencing by RNA	-5.31662	-3.74414	11/118	1655,1660,1981,5903,6774,7175,8021,9611,55746,57510,121504	DDX5,DHX9,EIF4G1,RANBP2,STAT3,TPR,NUP214,NCOR1,NUP133,XPO5,H4-16
11_Member	Reactome Gene Sets	R-HSA-913531	Interferon Signaling	-5.12134	-3.56492	14/200	1981,1982,2316,2317,3836,3837,3838,3839,5903,7175,7314,8021,9470,55746	EIF4G1,EIF4G2,FLNA,FLNB,KPNA1,KPNB1,KPNA2,KPNA3,RANBP2,TPR,UBB,NUP214,EIF4E2,NUP133
11_Member	GO Biological Processes	GO:0051028	mRNA transport	-4.99608	-3.45295	12/152	1660,1984,3178,3181,5903,5976,7175,7514,8021,8570,10128,55746	DHX9,EIF5A,HNRNPA1,HNRNPA2B1,RANBP2,UPF1,TPR,XPO1,NUP214,KHSRP,LRPPRC,NUP133
11_Member	Reactome Gene Sets	R-HSA-72306	tRNA processing	-4.89524	-3.36501	10/107	1478,1653,2058,3028,5901,5903,7175,8021,55746,283742	CSTF2,DDX1,EPRS1,HSD17B10,RAN,RANBP2,TPR,NUP214,NUP133,FAM98B
11_Member	Reactome Gene Sets	R-HSA-3108232	SUMO E3 ligases SUMOylate target proteins	-4.8911	-3.36158	13/182	1387,1655,2033,3066,3190,5111,5903,5905,7175,8021,10521,55746,121504	CREBBP,DDX5,EP300,HDAC2,HNRNPK,PCNA,RANBP2,RANGAP1,TPR,NUP214,DDX17,NUP133,H4-16
11_Member	GO Biological Processes	GO:0060968	regulation of gene silencing	-4.82575	-3.30497	12/158	1655,1660,1981,3008,5903,6774,7175,8021,9611,55746,57510,121504	DDX5,DHX9,EIF4G1,H1-4,RANBP2,STAT3,TPR,NUP214,NCOR1,NUP133,XPO5,H4-16
11_Member	Reactome Gene Sets	R-HSA-162587	HIV Life Cycle	-4.79816	-3.27926	12/159	2547,3836,5478,5901,5903,5905,7175,7314,7514,8021,10015,55746	XRCC6,KPNA1,PPIA,RAN,RANBP2,RANGAP1,TPR,UBB,XPO1,NUP214,PDCD6IP,NUP133
11_Member	Reactome Gene Sets	R-HSA-2990846	SUMOylation	-4.74087	-3.22726	13/188	1387,1655,2033,3066,3190,5111,5903,5905,7175,8021,10521,55746,121504	CREBBP,DDX5,EP300,HDAC2,HNRNPK,PCNA,RANBP2,RANGAP1,TPR,NUP214,DDX17,NUP133,H4-16
11_Member	Reactome Gene Sets	R-HSA-180746	Nuclear import of Rev protein	-4.71947	-3.20925	6/34	3837,5901,5903,7175,8021,55746	KPNB1,RAN,RANBP2,TPR,NUP214,NUP133
11_Member	GO Biological Processes	GO:0060964	regulation of gene silencing by miRNA	-4.65309	-3.14623	10/114	1655,1660,1981,5903,6774,7175,8021,9611,55746,121504	DDX5,DHX9,EIF4G1,RANBP2,STAT3,TPR,NUP214,NCOR1,NUP133,H4-16
11_Member	Reactome Gene Sets	R-HSA-168271	Transport of Ribonucleoproteins into the Host Nucleus	-4.64393	-3.13907	6/35	3836,3837,5903,7175,8021,55746	KPNA1,KPNB1,RANBP2,TPR,NUP214,NUP133
11_Member	Reactome Gene Sets	R-HSA-168333	NEP/NS2 Interacts with the Cellular Export Machinery	-4.50016	-3.01036	6/37	5901,5903,7175,7514,8021,55746	RAN,RANBP2,TPR,XPO1,NUP214,NUP133
11_Member	Reactome Gene Sets	R-HSA-168274	Export of Viral Ribonucleoproteins from Nucleus	-4.36523	-2.89246	6/39	5901,5903,7175,7514,8021,55746	RAN,RANBP2,TPR,XPO1,NUP214,NUP133
11_Member	Reactome Gene Sets	R-HSA-176033	Interactions of Vpr with host cellular proteins	-4.30077	-2.84379	6/40	293,3836,5903,7175,8021,55746	SLC25A6,KPNA1,RANBP2,TPR,NUP214,NUP133
11_Member	Reactome Gene Sets	R-HSA-4615885	SUMOylation of DNA replication proteins	-4.0046	-2.5875	6/45	5111,5903,5905,7175,8021,55746	PCNA,RANBP2,RANGAP1,TPR,NUP214,NUP133
11_Member	Reactome Gene Sets	R-HSA-162599	Late Phase of HIV Life Cycle	-3.74411	-2.34876	10/146	5478,5901,5903,5905,7175,7314,7514,8021,10015,55746	PPIA,RAN,RANBP2,RANGAP1,TPR,UBB,XPO1,NUP214,PDCD6IP,NUP133
11_Member	GO Biological Processes	GO:0006409	tRNA export from nucleus	-3.62306	-2.23946	5/34	5901,5903,7175,8021,55746	RAN,RANBP2,TPR,NUP214,NUP133
11_Member	GO Biological Processes	GO:0071431	tRNA-containing ribonucleoprotein complex export from nucleus	-3.62306	-2.23946	5/34	5901,5903,7175,8021,55746	RAN,RANBP2,TPR,NUP214,NUP133
11_Member	Reactome Gene Sets	R-HSA-191859	snRNP Assembly	-3.60341	-2.22382	6/53	5903,6606,6632,7175,8021,55746	RANBP2,SMN1,SNRPD1,TPR,NUP214,NUP133
11_Member	Reactome Gene Sets	R-HSA-194441	Metabolism of non-coding RNA	-3.60341	-2.22382	6/53	5903,6606,6632,7175,8021,55746	RANBP2,SMN1,SNRPD1,TPR,NUP214,NUP133
11_Member	Reactome Gene Sets	R-HSA-3301854	Nuclear Pore Complex (NPC) Disassembly	-3.56207	-2.18547	5/35	5903,7175,8021,55746,91754	RANBP2,TPR,NUP214,NUP133,NEK9
11_Member	GO Biological Processes	GO:0071426	ribonucleoprotein complex export from nucleus	-3.48352	-2.11563	9/129	1984,3181,5901,5903,5976,7175,7514,8021,55746	EIF5A,HNRNPA2B1,RAN,RANBP2,UPF1,TPR,XPO1,NUP214,NUP133
11_Member	GO Biological Processes	GO:0071166	ribonucleoprotein complex localization	-3.4587	-2.09287	9/130	1984,3181,5901,5903,5976,7175,7514,8021,55746	EIF5A,HNRNPA2B1,RAN,RANBP2,UPF1,TPR,XPO1,NUP214,NUP133
11_Member	GO Biological Processes	GO:0051031	tRNA transport	-3.44598	-2.08304	5/37	5901,5903,7175,8021,55746	RAN,RANBP2,TPR,NUP214,NUP133
11_Member	Reactome Gene Sets	R-HSA-180910	Vpr-mediated nuclear import of PICs	-3.44598	-2.08304	5/37	3836,5903,7175,8021,55746	KPNA1,RANBP2,TPR,NUP214,NUP133
11_Member	GO Biological Processes	GO:0097064	ncRNA export from nucleus	-3.39066	-2.03675	5/38	5901,5903,7175,8021,55746	RAN,RANBP2,TPR,NUP214,NUP133
11_Member	Reactome Gene Sets	R-HSA-68875	Mitotic Prophase	-3.17891	-1.84805	9/142	5594,5903,7175,8021,10051,10592,55746,91754,121504	MAPK1,RANBP2,TPR,NUP214,SMC4,SMC2,NUP133,NEK9,H4-16
11_Member	GO Biological Processes	GO:0040029	regulation of gene expression, epigenetic	-3.14333	-1.81678	22/613	1655,1660,1981,2033,3008,3066,3181,3192,5901,5903,5976,6774,7175,8021,9611,23019,23451,26058,51593,55746,57510,121504	DDX5,DHX9,EIF4G1,EP300,H1-4,HDAC2,HNRNPA2B1,HNRNPU,RAN,RANBP2,UPF1,STAT3,TPR,NUP214,NCOR1,CNOT1,SF3B1,GIGYF2,SRRT,NUP133,XPO5,H4-16
11_Member	Reactome Gene Sets	R-HSA-4570464	SUMOylation of RNA binding proteins	-2.95891	-1.6501	5/47	3190,5903,7175,8021,55746	HNRNPK,RANBP2,TPR,NUP214,NUP133
11_Member	Reactome Gene Sets	R-HSA-4551638	SUMOylation of chromatin organization proteins	-2.91776	-1.6179	6/71	3066,5903,7175,8021,55746,121504	HDAC2,RANBP2,TPR,NUP214,NUP133,H4-16
11_Member	GO Biological Processes	GO:0031503	protein-containing complex localization	-2.90337	-1.60504	13/289	1984,3181,3192,3842,5901,5903,5976,6421,7175,7430,7514,8021,55746	EIF5A,HNRNPA2B1,HNRNPU,TNPO1,RAN,RANBP2,UPF1,SFPQ,TPR,EZR,XPO1,NUP214,NUP133
11_Member	GO Biological Processes	GO:0016458	gene silencing	-2.90055	-1.60263	20/558	1655,1660,1981,3008,3066,3181,5901,5903,6774,7175,8021,9611,10521,23019,26058,26986,51593,55746,57510,121504	DDX5,DHX9,EIF4G1,H1-4,HDAC2,HNRNPA2B1,RAN,RANBP2,STAT3,TPR,NUP214,NCOR1,DDX17,CNOT1,GIGYF2,PABPC1,SRRT,NUP133,XPO5,H4-16
11_Member	GO Biological Processes	GO:0031047	gene silencing by RNA	-2.86571	-1.57026	17/442	1655,1660,1981,3181,5901,5903,6774,7175,8021,9611,10521,23019,26986,51593,55746,57510,121504	DDX5,DHX9,EIF4G1,HNRNPA2B1,RAN,RANBP2,STAT3,TPR,NUP214,NCOR1,DDX17,CNOT1,PABPC1,SRRT,NUP133,XPO5,H4-16
11_Member	Reactome Gene Sets	R-HSA-170822	Regulation of Glucokinase by Glucokinase Regulatory Protein	-2.7704	-1.49348	4/31	5903,7175,8021,55746	RANBP2,TPR,NUP214,NUP133
11_Member	Reactome Gene Sets	R-HSA-5619107	Defective TPR may confer susceptibility towards thyroid papillary carcinoma (TPC)	-2.7704	-1.49348	4/31	5903,7175,8021,55746	RANBP2,TPR,NUP214,NUP133
11_Member	Reactome Gene Sets	R-HSA-2980766	Nuclear Envelope Breakdown	-2.7595	-1.48454	5/52	5903,7175,8021,55746,91754	RANBP2,TPR,NUP214,NUP133,NEK9
11_Member	GO Biological Processes	GO:0016441	posttranscriptional gene silencing	-2.7397	-1.46893	16/415	1655,1660,1981,3181,5901,5903,6774,7175,8021,9611,23019,26058,51593,55746,57510,121504	DDX5,DHX9,EIF4G1,HNRNPA2B1,RAN,RANBP2,STAT3,TPR,NUP214,NCOR1,CNOT1,GIGYF2,SRRT,NUP133,XPO5,H4-16
11_Member	Reactome Gene Sets	R-HSA-159227	Transport of the SLBP independent Mature mRNA	-2.61905	-1.36627	4/34	5903,7175,8021,55746	RANBP2,TPR,NUP214,NUP133
11_Member	Reactome Gene Sets	R-HSA-4085377	SUMOylation of SUMOylation proteins	-2.61905	-1.36627	4/34	5903,7175,8021,55746	RANBP2,TPR,NUP214,NUP133
11_Member	Reactome Gene Sets	R-HSA-159230	Transport of the SLBP Dependant Mature mRNA	-2.57204	-1.32738	4/35	5903,7175,8021,55746	RANBP2,TPR,NUP214,NUP133
11_Member	GO Biological Processes	GO:0006406	mRNA export from nucleus	-2.55296	-1.31049	7/112	1984,3181,5903,5976,7175,8021,55746	EIF5A,HNRNPA2B1,RANBP2,UPF1,TPR,NUP214,NUP133
11_Member	GO Biological Processes	GO:0071427	mRNA-containing ribonucleoprotein complex export from nucleus	-2.55296	-1.31049	7/112	1984,3181,5903,5976,7175,8021,55746	EIF5A,HNRNPA2B1,RANBP2,UPF1,TPR,NUP214,NUP133
11_Member	GO Biological Processes	GO:0035195	gene silencing by miRNA	-2.44925	-1.21828	15/404	1655,1660,1981,3181,5901,5903,6774,7175,8021,9611,23019,51593,55746,57510,121504	DDX5,DHX9,EIF4G1,HNRNPA2B1,RAN,RANBP2,STAT3,TPR,NUP214,NCOR1,CNOT1,SRRT,NUP133,XPO5,H4-16
11_Member	Reactome Gene Sets	R-HSA-3232142	SUMOylation of ubiquitinylation proteins	-2.43996	-1.21111	4/38	5903,7175,8021,55746	RANBP2,TPR,NUP214,NUP133
11_Member	GO Biological Processes	GO:0035194	posttranscriptional gene silencing by RNA	-2.35197	-1.13736	15/414	1655,1660,1981,3181,5901,5903,6774,7175,8021,9611,23019,51593,55746,57510,121504	DDX5,DHX9,EIF4G1,HNRNPA2B1,RAN,RANBP2,STAT3,TPR,NUP214,NCOR1,CNOT1,SRRT,NUP133,XPO5,H4-16
11_Member	Reactome Gene Sets	R-HSA-159231	Transport of Mature mRNA Derived from an Intronless Transcript	-2.31966	-1.10845	4/41	5903,7175,8021,55746	RANBP2,TPR,NUP214,NUP133
11_Member	Reactome Gene Sets	R-HSA-159234	Transport of Mature mRNAs Derived from Intronless Transcripts	-2.28187	-1.07571	4/42	5903,7175,8021,55746	RANBP2,TPR,NUP214,NUP133
11_Member	Reactome Gene Sets	R-HSA-168325	Viral Messenger RNA Synthesis	-2.10782	-0.932352	4/47	5903,7175,8021,55746	RANBP2,TPR,NUP214,NUP133
11_Member	Reactome Gene Sets	R-HSA-211000	Gene Silencing by RNA	-2.09467	-0.920452	7/136	5901,5903,7175,8021,55746,57510,121504	RAN,RANBP2,TPR,NUP214,NUP133,XPO5,H4-16
11_Member	Reactome Gene Sets	R-HSA-5578749	Transcriptional regulation by small RNAs	-2.05271	-0.88282	6/106	5901,5903,7175,8021,55746,121504	RAN,RANBP2,TPR,NUP214,NUP133,H4-16
12_Summary	GO Biological Processes	GO:0034660	ncRNA metabolic process	-13.1089	-10.8832	39/564	1478,1653,2058,2975,3028,3181,4691,5036,5464,5901,5917,6125,6129,6130,6135,6155,6165,6187,6194,6201,6202,6203,6208,6223,6897,7407,8518,8570,9255,9330,10521,26610,51520,51593,54464,54859,55596,57510,283742	CSTF2,DDX1,EPRS1,GTF3C1,HSD17B10,HNRNPA2B1,NCL,PA2G4,PPA1,RAN,RARS1,RPL5,RPL7,RPL7A,RPL11,RPL27,RPL35A,RPS2,RPS6,RPS7,RPS8,RPS9,RPS14,RPS19,TARS1,VARS1,ELP1,KHSRP,AIMP1,GTF3C3,DDX17,ELP4,LARS1,SRRT,XRN1,ELP6,ZCCHC8,XPO5,FAM98B
12_Member	GO Biological Processes	GO:0034660	ncRNA metabolic process	-13.1089	-10.8832	39/564	1478,1653,2058,2975,3028,3181,4691,5036,5464,5901,5917,6125,6129,6130,6135,6155,6165,6187,6194,6201,6202,6203,6208,6223,6897,7407,8518,8570,9255,9330,10521,26610,51520,51593,54464,54859,55596,57510,283742	CSTF2,DDX1,EPRS1,GTF3C1,HSD17B10,HNRNPA2B1,NCL,PA2G4,PPA1,RAN,RARS1,RPL5,RPL7,RPL7A,RPL11,RPL27,RPL35A,RPS2,RPS6,RPS7,RPS8,RPS9,RPS14,RPS19,TARS1,VARS1,ELP1,KHSRP,AIMP1,GTF3C3,DDX17,ELP4,LARS1,SRRT,XRN1,ELP6,ZCCHC8,XPO5,FAM98B
12_Member	GO Biological Processes	GO:0034470	ncRNA processing	-7.43225	-5.64077	24/383	1478,1653,3028,3181,5036,6125,6129,6130,6135,6155,6165,6187,6194,6201,6202,6203,6208,6223,8518,10521,26610,51593,54859,283742	CSTF2,DDX1,HSD17B10,HNRNPA2B1,PA2G4,RPL5,RPL7,RPL7A,RPL11,RPL27,RPL35A,RPS2,RPS6,RPS7,RPS8,RPS9,RPS14,RPS19,ELP1,DDX17,ELP4,SRRT,ELP6,FAM98B
12_Member	GO Biological Processes	GO:0016072	rRNA metabolic process	-7.13656	-5.37617	19/256	2975,4691,5036,6125,6129,6130,6135,6155,6165,6187,6194,6201,6202,6203,6208,6223,9330,10521,54464	GTF3C1,NCL,PA2G4,RPL5,RPL7,RPL7A,RPL11,RPL27,RPL35A,RPS2,RPS6,RPS7,RPS8,RPS9,RPS14,RPS19,GTF3C3,DDX17,XRN1
12_Member	GO Biological Processes	GO:0006364	rRNA processing	-5.37804	-3.79508	15/217	5036,6125,6129,6130,6135,6155,6165,6187,6194,6201,6202,6203,6208,6223,10521	PA2G4,RPL5,RPL7,RPL7A,RPL11,RPL27,RPL35A,RPS2,RPS6,RPS7,RPS8,RPS9,RPS14,RPS19,DDX17
12_Member	Reactome Gene Sets	R-HSA-6790901	rRNA modification in the nucleus and cytosol	-2.39228	-1.16869	5/63	6187,6194,6201,6203,6208	RPS2,RPS6,RPS7,RPS9,RPS14
13_Summary	Reactome Gene Sets	R-HSA-3371556	Cellular response to heat stress	-12.946	-10.7442	17/89	1387,2033,3308,3309,3313,3337,5594,5903,7175,7266,7415,7531,8021,9531,10808,22824,55746,3066,3329,81570,1655,1660,1856,1981,2023,2521,3190,3276,3301,3315,4841,5034,5052,5111,5514,5591,6188,6421,7295,7430,9320,9611,10131,10399,56897,1153	CREBBP,EP300,HSPA4,HSPA5,HSPA9,DNAJB1,MAPK1,RANBP2,TPR,DNAJC7,VCP,YWHAE,NUP214,BAG3,HSPH1,HSPA4L,NUP133,HDAC2,HSPD1,CLPB,DDX5,DHX9,DVL2,EIF4G1,ENO1,FUS,HNRNPK,PRMT1,DNAJA1,HSPB1,NONO,P4HB,PRDX1,PCNA,PPP1R10,PRKDC,RPS3,SFPQ,TXN,EZR,TRIP12,NCOR1,TRAP1,RACK1,WRNIP1,CIRBP
13_Member	Reactome Gene Sets	R-HSA-3371556	Cellular response to heat stress	-12.946	-10.7442	17/89	1387,2033,3308,3309,3313,3337,5594,5903,7175,7266,7415,7531,8021,9531,10808,22824,55746	CREBBP,EP300,HSPA4,HSPA5,HSPA9,DNAJB1,MAPK1,RANBP2,TPR,DNAJC7,VCP,YWHAE,NUP214,BAG3,HSPH1,HSPA4L,NUP133
13_Member	Reactome Gene Sets	R-HSA-3371453	Regulation of HSF1-mediated heat shock response	-11.1437	-9.06759	14/69	3308,3309,3313,3337,5594,5903,7175,7266,7531,8021,9531,10808,22824,55746	HSPA4,HSPA5,HSPA9,DNAJB1,MAPK1,RANBP2,TPR,DNAJC7,YWHAE,NUP214,BAG3,HSPH1,HSPA4L,NUP133
13_Member	GO Biological Processes	GO:0034605	cellular response to heat	-8.931	-6.9975	16/136	1387,2033,3066,3329,3337,5594,5903,7175,7266,7415,7531,8021,9531,10808,55746,81570	CREBBP,EP300,HDAC2,HSPD1,DNAJB1,MAPK1,RANBP2,TPR,DNAJC7,VCP,YWHAE,NUP214,BAG3,HSPH1,NUP133,CLPB
13_Member	GO Biological Processes	GO:0080135	regulation of cellular response to stress	-8.57756	-6.67841	38/765	1387,1655,1660,1856,1981,2023,2033,2521,3190,3276,3301,3309,3315,3337,4841,5034,5052,5111,5514,5591,5594,5903,6188,6421,7175,7266,7295,7430,7531,8021,9320,9531,9611,10131,10399,10808,55746,56897	CREBBP,DDX5,DHX9,DVL2,EIF4G1,ENO1,EP300,FUS,HNRNPK,PRMT1,DNAJA1,HSPA5,HSPB1,DNAJB1,NONO,P4HB,PRDX1,PCNA,PPP1R10,PRKDC,MAPK1,RANBP2,RPS3,SFPQ,TPR,DNAJC7,TXN,EZR,YWHAE,NUP214,TRIP12,BAG3,NCOR1,TRAP1,RACK1,HSPH1,NUP133,WRNIP1
13_Member	GO Biological Processes	GO:1900034	regulation of cellular response to heat	-8.11938	-6.25815	12/79	1387,2033,3337,5594,5903,7175,7266,7531,8021,9531,10808,55746	CREBBP,EP300,DNAJB1,MAPK1,RANBP2,TPR,DNAJC7,YWHAE,NUP214,BAG3,HSPH1,NUP133
13_Member	GO Biological Processes	GO:0009408	response to heat	-8.08792	-6.23717	17/177	1387,2033,3066,3301,3329,3337,5594,5903,7175,7266,7415,7531,8021,9531,10808,55746,81570	CREBBP,EP300,HDAC2,DNAJA1,HSPD1,DNAJB1,MAPK1,RANBP2,TPR,DNAJC7,VCP,YWHAE,NUP214,BAG3,HSPH1,NUP133,CLPB
13_Member	GO Biological Processes	GO:0009266	response to temperature stimulus	-6.75295	-5.03699	18/244	1153,1387,2033,3066,3301,3329,3337,5594,5903,7175,7266,7415,7531,8021,9531,10808,55746,81570	CIRBP,CREBBP,EP300,HDAC2,DNAJA1,HSPD1,DNAJB1,MAPK1,RANBP2,TPR,DNAJC7,VCP,YWHAE,NUP214,BAG3,HSPH1,NUP133,CLPB
14_Summary	CORUM	CORUM:1332	Large Drosha complex	-12.6127	-10.4326	10/20	1653,1654,1655,2130,2521,3187,3192,4670,9987,10521,1660,3309,4691	DDX1,DDX3X,DDX5,EWSR1,FUS,HNRNPH1,HNRNPU,HNRNPM,HNRNPDL,DDX17,DHX9,HSPA5,NCL
14_Member	CORUM	CORUM:1332	Large Drosha complex	-12.6127	-10.4326	10/20	1653,1654,1655,2130,2521,3187,3192,4670,9987,10521	DDX1,DDX3X,DDX5,EWSR1,FUS,HNRNPH1,HNRNPU,HNRNPM,HNRNPDL,DDX17
14_Member	CORUM	CORUM:3082	DGCR8 multiprotein complex	-12.0446	-9.9158	8/11	1655,1660,2521,3187,3192,3309,4691,10521	DDX5,DHX9,FUS,HNRNPH1,HNRNPU,HSPA5,NCL,DDX17
15_Summary	GO Biological Processes	GO:0019058	viral life cycle	-11.6271	-9.51484	28/330	1642,1654,1655,1656,3836,3837,3838,3839,3921,4057,5034,5093,5094,5478,5901,5903,7175,7314,7415,7514,7879,8021,9217,10015,24138,26986,55746,56829,1072,1660,2033,3066,9958,26057,29110	DDB1,DDX3X,DDX5,DDX6,KPNA1,KPNB1,KPNA2,KPNA3,RPSA,LTF,P4HB,PCBP1,PCBP2,PPIA,RAN,RANBP2,TPR,UBB,VCP,XPO1,RAB7A,NUP214,VAPB,PDCD6IP,IFIT5,PABPC1,NUP133,ZC3HAV1,CFL1,DHX9,EP300,HDAC2,USP15,ANKRD17,TBK1
15_Member	GO Biological Processes	GO:0019058	viral life cycle	-11.6271	-9.51484	28/330	1642,1654,1655,1656,3836,3837,3838,3839,3921,4057,5034,5093,5094,5478,5901,5903,7175,7314,7415,7514,7879,8021,9217,10015,24138,26986,55746,56829	DDB1,DDX3X,DDX5,DDX6,KPNA1,KPNB1,KPNA2,KPNA3,RPSA,LTF,P4HB,PCBP1,PCBP2,PPIA,RAN,RANBP2,TPR,UBB,VCP,XPO1,RAB7A,NUP214,VAPB,PDCD6IP,IFIT5,PABPC1,NUP133,ZC3HAV1
15_Member	GO Biological Processes	GO:0043902	positive regulation of multi-organism process	-6.21537	-4.5514	15/186	1072,1642,1654,1660,2033,3066,3838,5034,5478,7879,9217,9958,26057,26986,29110	CFL1,DDB1,DDX3X,DHX9,EP300,HDAC2,KPNA2,P4HB,PPIA,RAB7A,VAPB,USP15,ANKRD17,PABPC1,TBK1
15_Member	GO Biological Processes	GO:0048524	positive regulation of viral process	-5.81681	-4.19754	11/105	1072,1642,1654,1660,2033,3838,5034,5478,7879,9217,26986	CFL1,DDB1,DDX3X,DHX9,EP300,KPNA2,P4HB,PPIA,RAB7A,VAPB,PABPC1
15_Member	GO Biological Processes	GO:0019079	viral genome replication	-5.80929	-4.19175	12/127	1642,1654,1655,4057,5093,5094,5478,7415,9217,24138,26986,56829	DDB1,DDX3X,DDX5,LTF,PCBP1,PCBP2,PPIA,VCP,VAPB,IFIT5,PABPC1,ZC3HAV1
15_Member	GO Biological Processes	GO:0050792	regulation of viral process	-5.57863	-3.97886	15/209	1072,1642,1654,1655,1660,2033,3838,4057,5034,5478,7879,9217,24138,26986,56829	CFL1,DDB1,DDX3X,DDX5,DHX9,EP300,KPNA2,LTF,P4HB,PPIA,RAB7A,VAPB,IFIT5,PABPC1,ZC3HAV1
15_Member	GO Biological Processes	GO:0043903	regulation of symbiosis, encompassing mutualism through parasitism	-5.18689	-3.6267	15/225	1072,1642,1654,1655,1660,2033,3838,4057,5034,5478,7879,9217,24138,26986,56829	CFL1,DDB1,DDX3X,DDX5,DHX9,EP300,KPNA2,LTF,P4HB,PPIA,RAB7A,VAPB,IFIT5,PABPC1,ZC3HAV1
15_Member	GO Biological Processes	GO:0043900	regulation of multi-organism process	-4.62637	-3.12549	20/412	1072,1642,1654,1655,1660,2033,3066,3838,4057,5034,5094,5478,7879,9217,9958,24138,26057,26986,29110,56829	CFL1,DDB1,DDX3X,DDX5,DHX9,EP300,HDAC2,KPNA2,LTF,P4HB,PCBP2,PPIA,RAB7A,VAPB,USP15,IFIT5,ANKRD17,PABPC1,TBK1,ZC3HAV1
15_Member	GO Biological Processes	GO:0045069	regulation of viral genome replication	-4.3663	-2.89246	9/99	1642,1654,1655,4057,5478,9217,24138,26986,56829	DDB1,DDX3X,DDX5,LTF,PPIA,VAPB,IFIT5,PABPC1,ZC3HAV1
15_Member	GO Biological Processes	GO:1903900	regulation of viral life cycle	-4.35809	-2.88963	11/149	1642,1654,1655,3838,4057,5034,5478,9217,24138,26986,56829	DDB1,DDX3X,DDX5,KPNA2,LTF,P4HB,PPIA,VAPB,IFIT5,PABPC1,ZC3HAV1
15_Member	GO Biological Processes	GO:1903902	positive regulation of viral life cycle	-4.25136	-2.79914	7/59	1642,1654,3838,5034,5478,9217,26986	DDB1,DDX3X,KPNA2,P4HB,PPIA,VAPB,PABPC1
15_Member	GO Biological Processes	GO:0045070	positive regulation of viral genome replication	-3.50308	-2.13385	5/36	1642,1654,5478,9217,26986	DDB1,DDX3X,PPIA,VAPB,PABPC1
16_Summary	GO Biological Processes	GO:0071103	DNA conformation change	-10.2358	-8.19995	26/326	301,1108,1642,1653,1654,1660,2547,3008,3181,4173,4176,4361,4673,4676,4678,7175,7314,8450,9131,10051,10592,56897,57082,57680,79711,121504,2033,2521,2873,4841,5111,5591,5976,6188,6421,7415,7874,9320,10075,57646,84991,3838,3329,3836	ANXA1,CHD4,DDB1,DDX1,DDX3X,DHX9,XRCC6,H1-4,HNRNPA2B1,MCM4,MCM7,MRE11,NAP1L1,NAP1L4,NASP,TPR,UBB,CUL4B,AIFM1,SMC4,SMC2,WRNIP1,KNL1,CHD8,IPO4,H4-16,EP300,FUS,GPS1,NONO,PCNA,PRKDC,UPF1,RPS3,SFPQ,VCP,USP7,TRIP12,HUWE1,USP28,RBM17,KPNA2,HSPD1,KPNA1
16_Member	GO Biological Processes	GO:0071103	DNA conformation change	-10.2358	-8.19995	26/326	301,1108,1642,1653,1654,1660,2547,3008,3181,4173,4176,4361,4673,4676,4678,7175,7314,8450,9131,10051,10592,56897,57082,57680,79711,121504	ANXA1,CHD4,DDB1,DDX1,DDX3X,DHX9,XRCC6,H1-4,HNRNPA2B1,MCM4,MCM7,MRE11,NAP1L1,NAP1L4,NASP,TPR,UBB,CUL4B,AIFM1,SMC4,SMC2,WRNIP1,KNL1,CHD8,IPO4,H4-16
16_Member	GO Biological Processes	GO:0032392	DNA geometric change	-8.9361	-6.99901	15/117	301,1108,1642,1653,1654,1660,2547,3181,4173,4176,4361,7314,8450,56897,57680	ANXA1,CHD4,DDB1,DDX1,DDX3X,DHX9,XRCC6,HNRNPA2B1,MCM4,MCM7,MRE11,UBB,CUL4B,WRNIP1,CHD8
16_Member	GO Biological Processes	GO:0032508	DNA duplex unwinding	-8.39109	-6.50496	14/109	301,1108,1642,1653,1654,1660,2547,4173,4176,4361,7314,8450,56897,57680	ANXA1,CHD4,DDB1,DDX1,DDX3X,DHX9,XRCC6,MCM4,MCM7,MRE11,UBB,CUL4B,WRNIP1,CHD8
16_Member	GO Biological Processes	GO:0006281	DNA repair	-5.46259	-3.87183	26/562	1642,1653,1660,2033,2521,2547,2873,4173,4176,4361,4841,5111,5591,5976,6188,6421,7314,7415,7874,8450,9320,10075,56897,57646,84991,121504	DDB1,DDX1,DHX9,EP300,FUS,XRCC6,GPS1,MCM4,MCM7,MRE11,NONO,PCNA,PRKDC,UPF1,RPS3,SFPQ,UBB,VCP,USP7,CUL4B,TRIP12,HUWE1,WRNIP1,USP28,RBM17,H4-16
16_Member	Reactome Gene Sets	R-HSA-73894	DNA Repair	-2.36011	-1.14361	13/334	1642,2033,2547,2873,3838,4361,5111,5591,7314,7415,7874,8450,121504	DDB1,EP300,XRCC6,GPS1,KPNA2,MRE11,PCNA,PRKDC,UBB,VCP,USP7,CUL4B,H4-16
16_Member	GO Biological Processes	GO:0006302	double-strand break repair	-2.33869	-1.12475	11/260	1653,2521,2547,4173,4176,4361,5591,6421,7415,9320,121504	DDX1,FUS,XRCC6,MCM4,MCM7,MRE11,PRKDC,SFPQ,VCP,TRIP12,H4-16
16_Member	GO Biological Processes	GO:0006310	DNA recombination	-2.33323	-1.12031	12/298	2521,2547,3008,3329,3836,3838,4173,4176,4361,4841,5591,6421	FUS,XRCC6,H1-4,HSPD1,KPNA1,KPNA2,MCM4,MCM7,MRE11,NONO,PRKDC,SFPQ
17_Summary	CORUM	CORUM:1335	SNW1 complex	-9.6656	-7.66872	8/18	1642,1937,3192,3309,6421,9343,10594,23020	DDB1,EEF1G,HNRNPU,HSPA5,SFPQ,EFTUD2,PRPF8,SNRNP200
17_Member	CORUM	CORUM:1335	SNW1 complex	-9.6656	-7.66872	8/18	1642,1937,3192,3309,6421,9343,10594,23020	DDB1,EEF1G,HNRNPU,HSPA5,SFPQ,EFTUD2,PRPF8,SNRNP200
18_Summary	Reactome Gene Sets	R-HSA-449147	Signaling by Interleukins	-9.54505	-7.55636	30/461	301,375,1072,1398,1399,3181,3185,3313,5034,5478,5594,5685,5690,5700,5705,5706,5707,5708,5718,6175,6774,6950,7184,7314,7431,7534,8878,9987,10197,29110,81,10399	ANXA1,ARF1,CFL1,CRK,CRKL,HNRNPA2B1,HNRNPF,HSPA9,P4HB,PPIA,MAPK1,PSMA4,PSMB2,PSMC1,PSMC5,PSMC6,PSMD1,PSMD2,PSMD12,RPLP0,STAT3,TCP1,HSP90B1,UBB,VIM,YWHAZ,SQSTM1,HNRNPDL,PSME3,TBK1,ACTN4,RACK1
18_Member	Reactome Gene Sets	R-HSA-449147	Signaling by Interleukins	-9.54505	-7.55636	30/461	301,375,1072,1398,1399,3181,3185,3313,5034,5478,5594,5685,5690,5700,5705,5706,5707,5708,5718,6175,6774,6950,7184,7314,7431,7534,8878,9987,10197,29110	ANXA1,ARF1,CFL1,CRK,CRKL,HNRNPA2B1,HNRNPF,HSPA9,P4HB,PPIA,MAPK1,PSMA4,PSMB2,PSMC1,PSMC5,PSMC6,PSMD1,PSMD2,PSMD12,RPLP0,STAT3,TCP1,HSP90B1,UBB,VIM,YWHAZ,SQSTM1,HNRNPDL,PSME3,TBK1
18_Member	Reactome Gene Sets	R-HSA-447115	Interleukin-12 family signaling	-8.63555	-6.73308	11/57	375,1072,3181,3185,3313,5034,5478,6175,6774,6950,9987	ARF1,CFL1,HNRNPA2B1,HNRNPF,HSPA9,P4HB,PPIA,RPLP0,STAT3,TCP1,HNRNPDL
18_Member	GO Biological Processes	GO:0035722	interleukin-12-mediated signaling pathway	-8.33997	-6.46647	10/47	375,1072,3181,3185,3313,5034,5478,6175,6950,9987	ARF1,CFL1,HNRNPA2B1,HNRNPF,HSPA9,P4HB,PPIA,RPLP0,TCP1,HNRNPDL
18_Member	Reactome Gene Sets	R-HSA-9020591	Interleukin-12 signaling	-8.33997	-6.46647	10/47	375,1072,3181,3185,3313,5034,5478,6175,6950,9987	ARF1,CFL1,HNRNPA2B1,HNRNPF,HSPA9,P4HB,PPIA,RPLP0,TCP1,HNRNPDL
18_Member	GO Biological Processes	GO:0071349	cellular response to interleukin-12	-8.15232	-6.28806	10/49	375,1072,3181,3185,3313,5034,5478,6175,6950,9987	ARF1,CFL1,HNRNPA2B1,HNRNPF,HSPA9,P4HB,PPIA,RPLP0,TCP1,HNRNPDL
18_Member	GO Biological Processes	GO:0070671	response to interleukin-12	-8.06188	-6.21699	10/50	375,1072,3181,3185,3313,5034,5478,6175,6950,9987	ARF1,CFL1,HNRNPA2B1,HNRNPF,HSPA9,P4HB,PPIA,RPLP0,TCP1,HNRNPDL
18_Member	Reactome Gene Sets	R-HSA-8950505	Gene and protein expression by JAK-STAT signaling after Interleukin-12 stimulation	-8.00239	-6.16041	9/38	375,1072,3181,3185,3313,5478,6175,6950,9987	ARF1,CFL1,HNRNPA2B1,HNRNPF,HSPA9,PPIA,RPLP0,TCP1,HNRNPDL
18_Member	GO Biological Processes	GO:0019221	cytokine-mediated signaling pathway	-4.87775	-3.34964	31/796	81,301,375,1072,1398,1399,3181,3185,3313,5034,5478,5685,5690,5700,5705,5706,5707,5708,5718,6175,6774,6950,7184,7314,7431,7534,8878,9987,10197,10399,29110	ACTN4,ANXA1,ARF1,CFL1,CRK,CRKL,HNRNPA2B1,HNRNPF,HSPA9,P4HB,PPIA,PSMA4,PSMB2,PSMC1,PSMC5,PSMC6,PSMD1,PSMD2,PSMD12,RPLP0,STAT3,TCP1,HSP90B1,UBB,VIM,YWHAZ,SQSTM1,HNRNPDL,PSME3,RACK1,TBK1
19_Summary	KEGG Pathway	M00050	Guanine ribonucleotide biosynthesis IMP => GDP,GTP	-9.26204	-7.29896	7/13	3614,3615,4830,4832,4833,5315,8833,3251,204,471,790,2618,7295,7298,10606,5901,191,5594	IMPDH1,IMPDH2,NME1,NME3,NME4,PKM,GMPS,HPRT1,AK2,ATIC,CAD,GART,TXN,TYMS,PAICS,RAN,AHCY,MAPK1
19_Member	KEGG Pathway	M00050	Guanine ribonucleotide biosynthesis IMP => GDP,GTP	-9.26204	-7.29896	7/13	3614,3615,4830,4832,4833,5315,8833	IMPDH1,IMPDH2,NME1,NME3,NME4,PKM,GMPS
19_Member	KEGG Pathway	hsa_M00050	Guanine ribonucleotide biosynthesis IMP => GDP,GTP	-9.26204	-7.29896	7/13	3614,3615,4830,4832,4833,5315,8833	IMPDH1,IMPDH2,NME1,NME3,NME4,PKM,GMPS
19_Member	GO Biological Processes	GO:1901070	guanosine-containing compound biosynthetic process	-8.9673	-7.0284	7/14	3251,3614,3615,4830,4832,4833,8833	HPRT1,IMPDH1,IMPDH2,NME1,NME3,NME4,GMPS
19_Member	Reactome Gene Sets	R-HSA-15869	Metabolism of nucleotides	-8.8334	-6.91049	14/101	204,471,790,2618,3251,3614,3615,4830,4832,4833,7295,7298,8833,10606	AK2,ATIC,CAD,GART,HPRT1,IMPDH1,IMPDH2,NME1,NME3,NME4,TXN,TYMS,GMPS,PAICS
19_Member	GO Biological Processes	GO:0042451	purine nucleoside biosynthetic process	-7.16991	-5.40711	7/23	3251,3614,3615,4830,4832,4833,8833	HPRT1,IMPDH1,IMPDH2,NME1,NME3,NME4,GMPS
19_Member	GO Biological Processes	GO:0046129	purine ribonucleoside biosynthetic process	-7.16991	-5.40711	7/23	3251,3614,3615,4830,4832,4833,8833	HPRT1,IMPDH1,IMPDH2,NME1,NME3,NME4,GMPS
19_Member	GO Biological Processes	GO:0006177	GMP biosynthetic process	-7.11294	-5.35612	4/4	3251,3614,3615,8833	HPRT1,IMPDH1,IMPDH2,GMPS
19_Member	GO Biological Processes	GO:0042455	ribonucleoside biosynthetic process	-7.04305	-5.29331	8/35	790,3251,3614,3615,4830,4832,4833,8833	CAD,HPRT1,IMPDH1,IMPDH2,NME1,NME3,NME4,GMPS
19_Member	GO Biological Processes	GO:0009163	nucleoside biosynthetic process	-6.30416	-4.62949	8/43	790,3251,3614,3615,4830,4832,4833,8833	CAD,HPRT1,IMPDH1,IMPDH2,NME1,NME3,NME4,GMPS
19_Member	GO Biological Processes	GO:0006183	GTP biosynthetic process	-6.26528	-4.59745	5/11	3614,3615,4830,4832,4833	IMPDH1,IMPDH2,NME1,NME3,NME4
19_Member	GO Biological Processes	GO:1901068	guanosine-containing compound metabolic process	-6.06805	-4.41733	8/46	3251,3614,3615,4830,4832,4833,5901,8833	HPRT1,IMPDH1,IMPDH2,NME1,NME3,NME4,RAN,GMPS
19_Member	GO Biological Processes	GO:1901659	glycosyl compound biosynthetic process	-5.99335	-4.35094	8/47	790,3251,3614,3615,4830,4832,4833,8833	CAD,HPRT1,IMPDH1,IMPDH2,NME1,NME3,NME4,GMPS
19_Member	GO Biological Processes	GO:0046128	purine ribonucleoside metabolic process	-5.60647	-4.00253	9/70	191,3251,3614,3615,4830,4832,4833,5901,8833	AHCY,HPRT1,IMPDH1,IMPDH2,NME1,NME3,NME4,RAN,GMPS
19_Member	GO Biological Processes	GO:0042278	purine nucleoside metabolic process	-5.45164	-3.86251	9/73	191,3251,3614,3615,4830,4832,4833,5901,8833	AHCY,HPRT1,IMPDH1,IMPDH2,NME1,NME3,NME4,RAN,GMPS
19_Member	GO Biological Processes	GO:0009119	ribonucleoside metabolic process	-5.35931	-3.77978	10/95	191,790,3251,3614,3615,4830,4832,4833,5901,8833	AHCY,CAD,HPRT1,IMPDH1,IMPDH2,NME1,NME3,NME4,RAN,GMPS
19_Member	GO Biological Processes	GO:0009116	nucleoside metabolic process	-5.24568	-3.68245	11/120	191,471,790,3251,3614,3615,4830,4832,4833,5901,8833	AHCY,ATIC,CAD,HPRT1,IMPDH1,IMPDH2,NME1,NME3,NME4,RAN,GMPS
19_Member	Reactome Gene Sets	R-HSA-499943	Interconversion of nucleotide di- and triphosphates	-5.04999	-3.49953	6/30	204,4830,4832,4833,7295,7298	AK2,NME1,NME3,NME4,TXN,TYMS
19_Member	GO Biological Processes	GO:0046039	GTP metabolic process	-4.96271	-3.42464	6/31	3614,3615,4830,4832,4833,5901	IMPDH1,IMPDH2,NME1,NME3,NME4,RAN
19_Member	GO Biological Processes	GO:0009148	pyrimidine nucleoside triphosphate biosynthetic process	-4.91241	-3.37939	5/19	790,4830,4832,4833,7298	CAD,NME1,NME3,NME4,TYMS
19_Member	GO Biological Processes	GO:0006228	UTP biosynthetic process	-4.82543	-3.30497	4/10	790,4830,4832,4833	CAD,NME1,NME3,NME4
19_Member	GO Biological Processes	GO:0046051	UTP metabolic process	-4.63491	-3.13336	4/11	790,4830,4832,4833	CAD,NME1,NME3,NME4
19_Member	KEGG Pathway	M00049	Adenine ribonucleotide biosynthesis, IMP => ADP,ATP	-4.57536	-3.07777	5/22	204,4830,4832,4833,5315	AK2,NME1,NME3,NME4,PKM
19_Member	KEGG Pathway	hsa_M00049	Adenine ribonucleotide biosynthesis, IMP => ADP,ATP	-4.57536	-3.07777	5/22	204,4830,4832,4833,5315	AK2,NME1,NME3,NME4,PKM
19_Member	GO Biological Processes	GO:1901657	glycosyl compound metabolic process	-4.49473	-3.00622	11/144	191,471,790,3251,3614,3615,4830,4832,4833,5901,8833	AHCY,ATIC,CAD,HPRT1,IMPDH1,IMPDH2,NME1,NME3,NME4,RAN,GMPS
19_Member	GO Biological Processes	GO:0009147	pyrimidine nucleoside triphosphate metabolic process	-4.47489	-2.98893	5/23	790,4830,4832,4833,7298	CAD,NME1,NME3,NME4,TYMS
19_Member	KEGG Pathway	hsa00230	Purine metabolism	-4.40937	-2.93162	12/174	204,471,2618,3251,3614,3615,4830,4832,4833,5315,8833,10606	AK2,ATIC,GART,HPRT1,IMPDH1,IMPDH2,NME1,NME3,NME4,PKM,GMPS,PAICS
19_Member	GO Biological Processes	GO:0009209	pyrimidine ribonucleoside triphosphate biosynthetic process	-4.04135	-2.61987	4/15	790,4830,4832,4833	CAD,NME1,NME3,NME4
19_Member	GO Biological Processes	GO:0046037	GMP metabolic process	-4.04135	-2.61987	4/15	3251,3614,3615,8833	HPRT1,IMPDH1,IMPDH2,GMPS
19_Member	GO Biological Processes	GO:0015949	nucleobase-containing small molecule interconversion	-3.96305	-2.55028	5/29	204,4830,4832,4833,7298	AK2,NME1,NME3,NME4,TYMS
19_Member	GO Biological Processes	GO:0009208	pyrimidine ribonucleoside triphosphate metabolic process	-3.92217	-2.51369	4/16	790,4830,4832,4833	CAD,NME1,NME3,NME4
19_Member	GO Biological Processes	GO:0046132	pyrimidine ribonucleoside biosynthetic process	-3.43392	-2.07671	4/21	790,4830,4832,4833	CAD,NME1,NME3,NME4
19_Member	GO Biological Processes	GO:0009220	pyrimidine ribonucleotide biosynthetic process	-3.35251	-2.00189	4/22	790,4830,4832,4833	CAD,NME1,NME3,NME4
19_Member	GO Biological Processes	GO:0009218	pyrimidine ribonucleotide metabolic process	-3.20182	-1.86815	4/24	790,4830,4832,4833	CAD,NME1,NME3,NME4
19_Member	GO Biological Processes	GO:0006221	pyrimidine nucleotide biosynthetic process	-3.04588	-1.73074	5/45	790,4830,4832,4833,7298	CAD,NME1,NME3,NME4,TYMS
19_Member	KEGG Pathway	M00052	Pyrimidine ribonucleotide biosynthesis, UMP => UDP/UTP,CDP/CTP	-3.0395	-1.726	3/12	4830,4832,4833	NME1,NME3,NME4
19_Member	KEGG Pathway	hsa_M00052	Pyrimidine ribonucleotide biosynthesis, UMP => UDP/UTP,CDP/CTP	-3.0395	-1.726	3/12	4830,4832,4833	NME1,NME3,NME4
19_Member	GO Biological Processes	GO:0046134	pyrimidine nucleoside biosynthetic process	-2.88113	-1.58527	4/29	790,4830,4832,4833	CAD,NME1,NME3,NME4
19_Member	GO Biological Processes	GO:0006241	CTP biosynthetic process	-2.83162	-1.54311	3/14	4830,4832,4833	NME1,NME3,NME4
19_Member	GO Biological Processes	GO:0046036	CTP metabolic process	-2.83162	-1.54311	3/14	4830,4832,4833	NME1,NME3,NME4
19_Member	GO Biological Processes	GO:0072528	pyrimidine-containing compound biosynthetic process	-2.6506	-1.39219	5/55	790,4830,4832,4833,7298	CAD,NME1,NME3,NME4,TYMS
19_Member	GO Biological Processes	GO:0046131	pyrimidine ribonucleoside metabolic process	-2.57204	-1.32738	4/35	790,4830,4832,4833	CAD,NME1,NME3,NME4
19_Member	GO Biological Processes	GO:0006220	pyrimidine nucleotide metabolic process	-2.45294	-1.22161	5/61	790,4830,4832,4833,7298	CAD,NME1,NME3,NME4,TYMS
19_Member	KEGG Pathway	hsa00983	Drug metabolism - other enzymes	-2.14079	-0.960056	4/46	3251,3614,3615,8833	HPRT1,IMPDH1,IMPDH2,GMPS
19_Member	GO Biological Processes	GO:0072527	pyrimidine-containing compound metabolic process	-2.09159	-0.917676	6/104	790,4830,4832,4833,5594,7298	CAD,NME1,NME3,NME4,MAPK1,TYMS
20_Summary	Canonical Pathways	M66	PID MYC ACTIV PATHWAY	-9.19192	-7.23265	13/79	790,1387,1981,2023,2033,3308,3329,3939,4691,4830,6135,10075,10935,1434,4738,6125,7874	CAD,CREBBP,EIF4G1,ENO1,EP300,HSPA4,HSPD1,LDHA,NCL,NME1,RPL11,HUWE1,PRDX3,CSE1L,NEDD8,RPL5,USP7
20_Member	Canonical Pathways	M66	PID MYC ACTIV PATHWAY	-9.19192	-7.23265	13/79	790,1387,1981,2023,2033,3308,3329,3939,4691,4830,6135,10075,10935	CAD,CREBBP,EIF4G1,ENO1,EP300,HSPA4,HSPD1,LDHA,NCL,NME1,RPL11,HUWE1,PRDX3
20_Member	Canonical Pathways	M261	PID P53 REGULATION PATHWAY	-5.22104	-3.65933	8/59	1387,1434,2033,4738,6125,6135,7874,10075	CREBBP,CSE1L,EP300,NEDD8,RPL5,RPL11,USP7,HUWE1

## Sheet: S5 All ADPr sites
s	Positions within proteins (canonical)	Amino acid	Gene name (primary)	Protein names	Localization prob	PEP	Score	Delta score	Intensity PARP13_01 (TOTAL)	Intensity PARP13_02 (TOTAL)	Intensity PARP7_01 (TOTAL)	Intensity PARP7_02 (TOTAL)	Intensity PARP7_PARP13_01 (TOTAL)	Intensity PARP7_PARP13_02 (TOTAL)	id (EVIDENCE)	Intensity PARP13_01 (MSMS)	Intensity PARP13_02 (MSMS)	Intensity PARP7_01 (MSMS)	Intensity PARP7_02 (MSMS)	Intensity PARP7_PARP13_01 (MSMS)	Intensity PARP7_PARP13_02 (MSMS)	Intensity PARP13_01 (MBR)	Intensity PARP13_02 (MBR)	Intensity PARP7_01 (MBR)	Intensity PARP7_02 (MBR)	Intensity PARP7_PARP13_01 (MBR)	Intensity PARP7_PARP13_02 (MBR)	Leading proteins	Modified sequence	Protein	Gene names	Fasta headers	Score diff	Score for localization	Number of ADP-ribosylation (CDEHKRSTY)	Sequence window	Modification window	Peptide window coverage	ADP-ribosylation (CDEHKRSTY) Probabilities	ADP-ribosylation (CDEHKRSTY) Score diffs	Position in peptide	Charge	Mass error [ppm]	Identification type PARP13_01	Identification type PARP13_02	Identification type PARP7_01	Identification type PARP7_02	Identification type PARP7_PARP13_01	Identification type PARP7_PARP13_02
P09874	499	S	PARP1	Poly [ADP-ribose] polymerase 1	1	2.4e-96	443.9	427.92	89698310000	24881749070	69352221000	75882060000	10101257320	66298460000	829;831;834;835;837;848;853;856;40072;40073;40075;40076;40077;40078;40079;40080;40081;40082;40083;40117;828;855;858;40074;12196;850;854;12230;12236;12239;827;849;869;871;12227;847;852;12187;12156;12190;830;12153;12161;832;836;12155;851;857;12242;12157;12159;12189;12162;833;12199;12186;42423;12194;42427;12154;838;868;870	88671700000	24881000000	69128600000	73915700000	10100800000	63605200000	1026610000	749070	223621000	1966360000	457320	2693260000	P09874	_AEPVEVVAPRGKS(ad)GAALSK_;_AEPVEVVAPRGKS(ad)GAALSKK_;_AEPVEVVAPRGKS(ad)GAALSKKSK_;_GKS(ad)GAALSK_;_GKS(ad)GAALSKK_;_GKS(ad)GAALSKKSK_;_S(ad)GAALSKK_;_S(ad)GAALSKKSKGQVK_;_SLQELFLAHILSPWGAEVKAEPVEVVAPRGKS(ad)GAALSK_	P09874	PARP1	Poly [ADP-ribose] polymerase 1 OS=Homo sapiens OX=9606 GN=PARP1 PE=1 SV=4	98.17	432.2	1;2	EVKAEPVEVVAPRGKSGAALSKKSKGQVKEE	X;X;X;X;X;X;X;X;X;X;X;X;X;X;ADP-ribosylation (CDEHKRSTY);ADP-ribosylation (CDEHKRSTY);X;X;X;X;ADP-ribosylation (CDEHKRSTY);ADP-ribosylation (CDEHKRSTY);ADP-ribosylation (CDEHKRSTY);ADP-ribosylation (CDEHKRSTY);ADP-ribosylation (CDEHKRSTY);X;X;X;ADP-ribosylation (CDEHKRSTY);ADP-ribosylation (CDEHKRSTY);X	PPPPPPPPPPPPPPPPPPPPPPPPPPPPPPP	S(1)GAALSKKS(0.999)K(0.001)GQVKEEGINKSEKR	S(98.17)GAALS(-98.17)K(-86.43)K(-50.29)S(31.25)K(-31.25)GQVK(-176.95)E(-197.08)E(-235.44)GINK(-323.7)S(-346.01)E(-353.02)K(-372.65)R(-432.2)	1	5	0.075037	By MS/MS	By MS/MS	By MS/MS	By MS/MS	By MS/MS	By MS/MS
P09874	507	S	PARP1	Poly [ADP-ribose] polymerase 1	1	2.24e-113	460.69	450.67	150187000000	70617880000	49568490000	95246500000	12045300000	102922000000	12226;12229;12234;12238;12241;12354;12357;40154;40157;40164;40168;40170;40267;41866;12237;22849;40091;40093;40094;40095;40121;40124;40153;40163;40115;40125;41762;41763;41765;41811;41856;40119;40120;40156;40161;40205;40207;40209;41756;41759;40199;40202;40263;41862;12296;40116;41755;12233;40155;40159;40167;40203;41764;41821;40096;40162;40213;22801;40160;12356;40114;41830;12240;40090;40262;12225;418…	96068900000	69573700000	47005800000	83638500000	11949600000	92169200000	54117600000	1044180000	2562690000	11608000000	95700000	10752300000	P09874	_GKSGAALSKKS(ad)K_;_GKSGAALSKKS(ad)KGQVK_;_GKSGAALSKKS(ad)KGQVKEEGINKSEK_;_KS(ad)KGQVKEEGINK_;_KS(ad)KGQVKEEGINKSEK_;_KS(ad)KGQVKEEGINKSEKR_;_S(ad)KGQVKEEGINK_;_S(ad)KGQVKEEGINKSEK_;_S(ad)KGQVKEEGINKSEKR_;_SGAALSKKS(ad)K_;_SGAALSKKS(ad)KGQVK_;_SGAALSKKS(ad)KGQVKEEGINK_;_SGAALSKKS(ad)KGQVKEEGINKSEK_;_SGAALSKKS(ad)KGQVKEEGINKSEKR_	P09874	PARP1	Poly [ADP-ribose] polymerase 1 OS=Homo sapiens OX=9606 GN=PARP1 PE=1 SV=4	88.7802	218.16	1;2	VVAPRGKSGAALSKKSKGQVKEEGINKSEKR	X;X;X;X;X;X;ADP-ribosylation (CDEHKRSTY);ADP-ribosylation (CDEHKRSTY);X;X;X;X;ADP-ribosylation (CDEHKRSTY);ADP-ribosylation (CDEHKRSTY);ADP-ribosylation (CDEHKRSTY);ADP-ribosylation (CDEHKRSTY);ADP-ribosylation (CDEHKRSTY);X;X;X;ADP-ribosylation (CDEHKRSTY);X;X;X;X;X;ADP-ribosylation (CDEHKRSTY);ADP-ribosylation (CDEHKRSTY);X;X;X	PPPPPPPPPPPPPPPPPPPPPPPPPPPPPPP	S(1)K(1)GQVKEEGINKSEKR	S(88.78)K(88.78)GQVK(-88.78)E(-98.71)E(-126.8)GINK(-192.97)S(-192.97)E(-203)K(-213.63)R(-218.16)	1	4	0.4367	By MS/MS	By MS/MS	By MS/MS	By MS/MS	By MS/MS	By MS/MS
P06899	7	S	HIST1H2BJ	Histone H2B type 1-K;Histone H2B type F-S;Histone H2B type 1-J;Histone H2B type 2-E	1	4.91e-30	260.56	256.04	67054788900	81444159250	18968900000	41426800000	11765600000	32058330000	32227;32231;32244;32250;32259;32269;32286;39285;39286;39287;39288;39289;39290;39291;39293;39295;39296;39297;39300;39301;39302;39304;39305;39306;39316;39318;39321;39322;39328;39350;39354;32220;32223;32224;32226;32228;32233;32243;32245;32246;32248;32249;32260;32261;32266;32276;32278;32280;32284;32285;32288;32312;32316;39326;32264;32263;32265;32268;32287;32222;32267;32279;32232;32247;32252;32283;323…	67037900000	81441500000	18968900000	35445300000	11765600000	24051900000	16888900	2659250		5981500000		8006430000	O60814;P06899;Q16778	_(ac)PEPAKS(ad)APAPK_;_MPEPAKS(ad)APAPK_;_PEPAKS(ad)APAPK_;_PEPAKS(ad)APAPKK_;_PEPAKS(ad)APAPKKGSK_;_PEPAKS(ad)APAPKKGSKK_;_PEPAKS(ad)APAPKKGSKKAVTK_;_S(ad)APAPKK_;_S(ad)APAPKKGSK_;_S(ad)APAPKKGSKK_;_S(ad)APAPKKGSKKAVTK_	P06899	HIST1H2BK;H2BFS;HIST1H2BJ;HIST2H2BE	Histone H2B type 1-K OS=Homo sapiens OX=9606 GN=HIST1H2BK PE=1 SV=3;Histone H2B type F-S OS=Homo sapiens OX=9606 GN=H2BFS PE=1 SV=2;Histone H2B type 1-J OS=Homo sapiens OX=9606 GN=HIST1H2BJ PE=1 SV=3;Histone H2B type 2-E OS=Homo sapiens OX=9606 GN=HIST2H2B	76.2685	192.18	1;2	_________MPEPAKSAPAPKKGSKKAVTKA	X;X;X;X;X;X;X;X;X;X;X;X;X;X;ADP-ribosylation (CDEHKRSTY);ADP-ribosylation (CDEHKRSTY);X;X;X;X;ADP-ribosylation (CDEHKRSTY);ADP-ribosylation (CDEHKRSTY);X;ADP-ribosylation (CDEHKRSTY);X;X;X;X;X;X;X	XXXXXXXXXPPPPPPPPPPPPPPPPPPPPPX	S(1)APAPKKGSKKAVTK	S(76.27)APAPK(-76.27)K(-104.66)GS(-145.29)K(-164.91)K(-175.56)AVT(-191.92)K(-192.18)	1	4	-0.18134	By MS/MS	By MS/MS	By MS/MS	By MS/MS	By MS/MS	By MS/MS
Q7Z3E1	543	C	TIPARP	TCDD-inducible poly [ADP-ribose] polymerase	1	3.69e-66	364.59	359.54	37591600		16885950000	22290860000	7824150000	22939040000	15378;15379;15381;15382;15383;15384;15386;15387;15388;15389;15390;15391;15393;15394;15395;15396;15397;15398;15399;15400;15401;15402;15403;15450;15458;17555;15442;17553;15448;15459;15437;15392;15446;15457;15483;15380;15444;15385;15439;15455;15443;15451;15452;15487;15449;15447;15479;15438;15488;15440;15456;15460;15486;15454;15453;15436;15489;17560;15445;17556			14097100000	19367600000	6656770000	22280400000	37591600		2788850000	2923260000	1167380000	658640000	G5E9W1	_HLFHGTSQDVVDGIC(ad)K_;_HLFHGTSQDVVDGIC(ad)KHNFDPR_;_HLFHGTSQDVVDGIC(ad)KHNFDPRVC(ca)GK_;_IINERHLFHGTSQDVVDGIC(ad)K_;_IINERHLFHGTSQDVVDGIC(ad)KHNFDPR_	G5E9W1	TIPARP	Protein mono-ADP-ribosyltransferase TIPARP (Fragment) OS=Homo sapiens OX=9606 GN=TIPARP PE=1 SV=1;Protein mono-ADP-ribosyltransferase TIPARP OS=Homo sapiens OX=9606 GN=TIPARP PE=1 SV=1;Poly [ADP-ribose] polymerase (Fragment) OS=Homo sapiens OX=9606 GN=TIPA	79.9336	201.06	1	RHLFHGTSQDVVDGICKHNFDPRVCGKHATM	X;X;X;X;X;X;X;X;X;X;X;X;X;X;X;ADP-ribosylation (CDEHKRSTY);X;ADP-ribosylation (CDEHKRSTY);X;X;X;X;ADP-ribosylation (CDEHKRSTY);X;Carbamidomethyl (C);ADP-ribosylation (CDEHKRSTY);X;X;ADP-ribosylation (CDEHKRSTY);X;ADP-ribosylation (CDEHKRSTY);Oxidation (M)	PPPPPPPPPPPPPPPPPPPPPPPPPPPXXXX	HLFHGTSQDVVDGIC(1)K	H(-200.83)LFH(-193.64)GT(-170.11)S(-163.9)QD(-132.48)VVD(-79.93)GIC(79.93)K(-201.06)	15	4	-0.29236	By matching		By MS/MS	By MS/MS	By MS/MS	By MS/MS
Q7Z3E1	39	C	TIPARP	TCDD-inducible poly [ADP-ribose] polymerase	0.999833	1.8e-40	296.14	274.57	6485600		14137879000	4795675100	4071470000	8436913000	19098;19110;27166;27173;19097;19100;19107;19108;19109;19113;19096;27164;19112;27153;27157;19111;19095;19118;27165;27167;27163;27162;19099;27170;19121;27155			13928400000	4768110000	4071470000	8237250000	6485600		209479000	27565100		199663000	G5E9W1	_ITPLKTC(ad)FK_;_ITPLKTC(ad)FKK_;_ITPLKTC(ad)FKKK_;_ITPLKTC(ad)FKKKDQK_;_LSEKITPLKTC(ad)FK_;_LSEKITPLKTC(ad)FKK_;_LSEKITPLKTC(ad)FKKK_;_LSEKITPLKTC(ad)FKKKDQK_	G5E9W1	TIPARP	Protein mono-ADP-ribosyltransferase TIPARP (Fragment) OS=Homo sapiens OX=9606 GN=TIPARP PE=1 SV=1;Protein mono-ADP-ribosyltransferase TIPARP OS=Homo sapiens OX=9606 GN=TIPARP PE=1 SV=1;Protein mono-ADP-ribosyltransferase TIPARP (Fragment) OS=Homo sapiens O	37.7801	296.14	1	SCQMRLSEKITPLKTCFKKKDQKRLGTGTLR	X;X;X;X;X;X;X;X;ADP-ribosylation (CDEHKRSTY);X;X;X;X;X;X;ADP-ribosylation (CDEHKRSTY);X;X;X;X;X;X;X;ADP-ribosylation (CDEHKRSTY);X;X;X;X;X;X;X	XXXXXPPPPPPPPPPPPPPPPPPXXXXXXXX	LSEKITPLKTC(1)FKKKDQK	LS(-222.21)E(-205.75)K(-188.16)IT(-139.65)PLK(-85.24)T(-37.78)C(37.78)FK(-73.69)K(-96.56)K(-118.56)D(-129.22)QK(-296.14)	11	4	-0.7258	By matching		By MS/MS	By MS/MS	By MS/MS	By MS/MS
P84243	11	S	H3F3A	Histone H3.2;Histone H3.1;Histone H3.3;Histone H3;Histone H3.3C;Histone H3.1t	0.99974	6.15e-25	250.69	220.65	52429314000	67162860500	13565740000	36304000000	9034570000	28427685000	33896;33860;33861;33866;33869;33871;33882;33886;33887;33892;33893;46796;33884;44258;44282;44301;33867;33868;33894;44275;44281;33859;33865;33889;33895;44274;44277;44298;46794;33864;33883;44299;46786;46788;23015;44260;46792;46787;44283;46793;33863;44279;33872;44276;46795;46797;46789;46791;44296;44278;23023;3597;46785;33847;46790;44257;44262;23019;44280;44259;33849;44264;22988;22989;22985;23026;2298…	52392700000	67137300000	8766340000	29401200000	9034570000	27721400000	36614000	25560500	4799400000	6902800000		706285000	Q71DI3;P84243;Q16695;Q5TEC6	_ARTKQTARKS(ad)TGGKAPR_;_KS(ad)TGGKAPR_;_KS(ad)TGGKAPRK_;_QTARKS(ad)TGGK_;_QTARKS(ad)TGGKAPR_;_QTARKS(ad)TGGKAPRK_;_S(ad)TGGKAPR_;_S(ad)TGGKAPRK_;_S(ad)TGGKAPRKQLATK_;_TKQTARKS(ad)TGGK_;_TKQTARKS(ad)TGGKAPR_	Q71DI3	HIST2H3A;HIST1H3A;H3F3A;H3F3B;H3F3C;HIST3H3;HIST2H3PS2	Histone H3.2 OS=Homo sapiens OX=9606 GN=HIST2H3A PE=1 SV=3;Histone H3.1 OS=Homo sapiens OX=9606 GN=HIST1H3A PE=1 SV=2;Histone H3.3 OS=Homo sapiens OX=9606 GN=H3F3A PE=1 SV=2;Histone H3 (Fragment) OS=Homo sapiens OX=9606 GN=H3F3B PE=1 SV=1;Histone H3 OS=Hom	38.8556	172.33	1;2	_____MARTKQTARKSTGGKAPRKQLATKAA;_____MARTKQTARKSTGGKAPRKQLATKVA	X;X;X;X;X;X;X;X;X;X;X;X;X;X;ADP-ribosylation (CDEHKRSTY);ADP-ribosylation (CDEHKRSTY);ADP-ribosylation (CDEHKRSTY);X;X;X;X;X;X;X;X;X;X;X;X;X;X	XXXXXXPPPPPPPPPPPPPPPPPPPPPPPXX	QTARKS(1)TGGKAPRK	QT(-100.12)AR(-73.36)K(-38.86)S(38.86)T(-38.86)GGK(-102.07)APR(-128.9)K(-172.33)	6	5	0.055437	By MS/MS	By MS/MS	By MS/MS	By MS/MS	By MS/MS	By MS/MS
Q7Z3E1	552	C	TIPARP	TCDD-inducible poly [ADP-ribose] polymerase	0.999986	1.71e-52	333.69	319.45	12143000		12987951100	17642220000	2925665000	14075104000	15830;15831;15832;15834;15835;15837;15846;15847;48909;15478;15856;15477;15858;15836;15843;15481;15833;15476;15482;15838;15484;15854;15844;48910;48908;15848;15475	12143000		12899500000	16459500000	2664290000	13616700000			88451100	1182720000	261375000	458404000	G5E9W1	_HLFHGTSQDVVDGIC(ca)KHNFDPRVC(ad)GK_;_HNFDPRVC(ad)GK_;_HNFDPRVC(ad)GKHATM(ox)FGQGSYFAK_;_HNFDPRVC(ad)GKHATMFGQGSYFAK_;_HNFDPRVC(ad)GKHATMFGQGSYFAKK_;_VC(ad)GKHATM(ox)FGQGSYFAK_;_VC(ad)GKHATMFGQGSYFAK_	G5E9W1	TIPARP	Protein mono-ADP-ribosyltransferase TIPARP (Fragment) OS=Homo sapiens OX=9606 GN=TIPARP PE=1 SV=1;Protein mono-ADP-ribosyltransferase TIPARP OS=Homo sapiens OX=9606 GN=TIPARP PE=1 SV=1;Poly [ADP-ribose] polymerase (Fragment) OS=Homo sapiens OX=9606 GN=TIPA	48.4519	94.363	1	DVVDGICKHNFDPRVCGKHATMFGQGSYFAK	X;X;X;ADP-ribosylation (CDEHKRSTY);X;X;Carbamidomethyl (C);ADP-ribosylation (CDEHKRSTY);X;ADP-ribosylation (CDEHKRSTY);X;X;X;X;X;X;Carbamidomethyl (C);ADP-ribosylation (CDEHKRSTY);X;X;ADP-ribosylation (CDEHKRSTY);X;ADP-ribosylation (CDEHKRSTY);Oxidation (M);X;X;X;X;ADP-ribosylation (CDEHKRSTY);ADP-ribosylation (CDEHKRSTY);X;X;X	PPPPPPPPPPPPPPPPPPPPPPPPPPPPPPP	HNFDPRVC(1)GK	H(-90.17)NFD(-72.05)PR(-48.45)VC(48.45)GK(-94.36)	8	3	-0.53781	By MS/MS	By MS/MS	By MS/MS	By MS/MS	By MS/MS	By MS/MS
P09874	519	S	PARP1	Poly [ADP-ribose] polymerase 1	0.999767	3.11e-52	358.04	326.08	14683540000	6250262000	8405516000	5224780000	2455420000	13451730000	6530;13223;13257;13258;13261;13265;13267;13269;13275;22896;6560;13225;13231;13233;13263;13266;6527;6537;13230;13235;13259;41829;41835;41836;6528;13226;13232;13272;22897;41851;41854;41865;41870;41905;6555;13270;13294;13297;41832;41860;22838;22887;41818;41853;41909;13274;13293;22843;41852;41926;13282;13287;13288;41861;13227;13268;13295;41810;6557;13262;13264;41831;13222;6561;41858;13277;6511;13228;…	11223600000	5820400000	8183560000	4067210000	1460110000	12272700000	3459940000	429862000	221956000	1157570000	995310000	1179030000	P09874	_EEGINKS(ad)EK_;_EEGINKS(ad)EKR_;_EEGINKS(ad)EKRM(ox)K_;_EEGINKS(ad)EKRMK_;_EEGINKS(ad)EKRMKLTLK_;_GQVKEEGINKS(ad)EK_;_GQVKEEGINKS(ad)EKR_;_GQVKEEGINKS(ad)EKRM(ox)K_;_GQVKEEGINKS(ad)EKRMK_;_GQVKEEGINKS(ad)EKRMKLTLK_;_KSKGQVKEEGINKS(ad)EK_;_KSKGQVKEEGINKS(ad)EKR_;_SKGQVKEEGINKS(ad)EK_;_SKGQVKEEGINKS(ad)EKR_;_SKGQVKEEGINKS(ad)EKRMK_;_SKGQVKEEGINKS(ad)EKRMKLTLK_	P09874	PARP1	Poly [ADP-ribose] polymerase 1 OS=Homo sapiens OX=9606 GN=PARP1 PE=1 SV=4	39.3289	212.21	1;2	SKKSKGQVKEEGINKSEKRMKLTLKGGAAVD	ADP-ribosylation (CDEHKRSTY);ADP-ribosylation (CDEHKRSTY);ADP-ribosylation (CDEHKRSTY);ADP-ribosylation (CDEHKRSTY);ADP-ribosylation (CDEHKRSTY);X;X;X;X;X;X;X;X;X;ADP-ribosylation (CDEHKRSTY);ADP-ribosylation (CDEHKRSTY);X;X;X;Oxidation (M);X;X;X;X;X;X;X;X;X;X;X	PPPPPPPPPPPPPPPPPPPPPPPPPXXXXXX	EEGINKS(1)EKR	E(-183.14)E(-169.58)GINK(-39.33)S(39.33)E(-39.33)K(-75.25)R(-212.21)	7	3	-0.28369	By MS/MS	By MS/MS	By MS/MS	By MS/MS	By MS/MS	By MS/MS
Q7Z3E1	387	H	TIPARP	TCDD-inducible poly [ADP-ribose] polymerase	0.99913	4.31e-28	261.67	251.29			5045681000	740246000	83217000	5823597000	9306;9314;9315;9312;9305;9334;9331;9323;9327;9307;9310;9309;9290;9326;9295			5032670000	442207000	83217000	5491200000			13011000	298039000		332397000	G5E9W1	_FM(ox)M(ox)WNNH(ad)YILHNSFFR_;_FM(ox)MWNNH(ad)YILHNSFFR_;_FMMWNNH(ad)YILHNSFFR_	G5E9W1	TIPARP	Protein mono-ADP-ribosyltransferase TIPARP (Fragment) OS=Homo sapiens OX=9606 GN=TIPARP PE=1 SV=1;Protein mono-ADP-ribosyltransferase TIPARP OS=Homo sapiens OX=9606 GN=TIPARP PE=1 SV=1;Poly [ADP-ribose] polymerase (Fragment) OS=Homo sapiens OX=9606 GN=TIPA	30.6687	169.4	1	NSRGLKEVRFMMWNNHYILHNSFFRREIKRR	X;ADP-ribosylation (CDEHKRSTY);ADP-ribosylation (CDEHKRSTY);X;X;X;X;X;X;X;Oxidation (M);Oxidation (M);X;X;X;ADP-ribosylation (CDEHKRSTY);X;X;X;X;X;X;X;X;X;ADP-ribosylation (CDEHKRSTY);X;X;X;ADP-ribosylation (CDEHKRSTY);X	XXXXXXXXXPPPPPPPPPPPPPPPPXXXXXX	FMMWNNH(0.999)Y(0.001)ILHNSFFR	FMMWNNH(30.67)Y(-30.67)ILH(-84.99)NS(-115.39)FFR(-169.4)	7	3	-0.13421			By MS/MS	By MS/MS	By MS/MS	By MS/MS
Q7Z3E1	571	Y	TIPARP	TCDD-inducible poly [ADP-ribose] polymerase	0.999977	5.68e-16	224.75	224.75			4666529900	4404263900	766026500	3618271400	20057;20059;20061;20063;20064;3887;20056;20040;20041;3900;20038;20036;3880;20060;3898;3895;3884;3893;3882;20078;3903			4656280000	4390290000	756081000	3609080000			10249900	13973900	9945500	9191400	G5E9W1	_ASY(ad)SHNFSK_;_ASY(ad)SHNFSKK_;_ASY(ad)SHNFSKKSSK_;_KASY(ad)SHNFSK_;_KASY(ad)SHNFSKK_;_KASY(ad)SHNFSKKSSK_	G5E9W1	TIPARP	Protein mono-ADP-ribosyltransferase TIPARP (Fragment) OS=Homo sapiens OX=9606 GN=TIPARP PE=1 SV=1;Protein mono-ADP-ribosyltransferase TIPARP OS=Homo sapiens OX=9606 GN=TIPARP PE=1 SV=1;Poly [ADP-ribose] polymerase (Fragment) OS=Homo sapiens OX=9606 GN=TIPA	49.4286	224.75	1	ATMFGQGSYFAKKASYSHNFSKKSSKGVHFM	X;ADP-ribosylation (CDEHKRSTY);Oxidation (M);X;X;X;X;ADP-ribosylation (CDEHKRSTY);ADP-ribosylation (CDEHKRSTY);X;X;X;X;X;X;ADP-ribosylation (CDEHKRSTY);X;X;X;X;X;X;X;X;X;ADP-ribosylation (CDEHKRSTY);X;X;ADP-ribosylation (CDEHKRSTY);X;Oxidation (M)	XXXXXXXXXXXXPPPPPPPPPPPPPPXXXXX	KASY(1)SHNFSKK	K(-99.03)AS(-49.43)Y(49.43)S(-49.43)H(-93.34)NFS(-171.37)K(-190.42)K(-224.75)	4	4	-0.16776			By MS/MS	By MS/MS	By MS/MS	By MS/MS
P23527	7	S	HIST1H2BO	Histone H2B type 1-O	1	1.31e-19	241.51	217.88	10595849000	12291283800	3354930000	6954156960	2778650000	5017819000	32081;32083;32084;32085;32101;32104;32105;32110;32125;32130;32100;32103;32112;32113;32114;32132;32088;32122;32127;32131;32111;32108;32124;32128;32129;32082;32115;32116;32126;32133;32089;32106;32123;32136;32109;32086;32090;32102;32107;32117;32118;32135;32087;32139	10548700000	12255300000	3201990000	6953510000	2778650000	4371630000	47149000	35983800	152940000	646960		646189000	P23527	_(ac)PDPAKS(ad)APAPKK_;_(ac)PDPAKS(ad)APAPKKGSKK_;_PDPAKS(ad)APAPK_;_PDPAKS(ad)APAPKK_;_PDPAKS(ad)APAPKKGSK_;_PDPAKS(ad)APAPKKGSKK_;_PDPAKS(ad)APAPKKGSKKAVTK_	P23527	HIST1H2BO	Histone H2B type 1-O OS=Homo sapiens OX=9606 GN=HIST1H2BO PE=1 SV=3	76.2685	192.18	1;2	_________MPDPAKSAPAPKKGSKKAVTKA	X;X;X;X;X;X;X;X;X;X;X;X;X;X;ADP-ribosylation (CDEHKRSTY);ADP-ribosylation (CDEHKRSTY);X;X;X;X;ADP-ribosylation (CDEHKRSTY);ADP-ribosylation (CDEHKRSTY);X;ADP-ribosylation (CDEHKRSTY);X;X;X;X;X;X;X	XXXXXXXXXXPPPPPPPPPPPPPPPPPPPPX	S(1)APAPKKGSKKAVTK	S(76.27)APAPK(-76.27)K(-104.66)GS(-145.29)K(-164.91)K(-175.56)AVT(-191.92)K(-192.18)	1	4	-0.18134	By MS/MS	By MS/MS	By MS/MS	By MS/MS	By MS/MS	By MS/MS
P58876	7	S	HIST1H2BD	Histone H2B type 1-D	1	1.31e-19	241.51	217.88	8037140000	9884166000	3057140000	4542610000	2204690000	4710560000	32364;32365;32367;32371;32373;32374;32375;32378;32370;32368;32382;32351;32391;32389;32384;32380;32385;32369;32377;32390;32386;32387;32372;32379;32366;32383;32392;32381;32376;32360;32355;32352;32357;32354;32350;32353;32388	8037140000	9815930000	3057140000	4542610000	2204690000	4710560000		68236000					P58876	_PEPTKS(ad)APAPK_;_PEPTKS(ad)APAPKK_;_PEPTKS(ad)APAPKKGSK_;_PEPTKS(ad)APAPKKGSKK_	P58876	HIST1H2BD	Histone H2B type 1-D OS=Homo sapiens OX=9606 GN=HIST1H2BD PE=1 SV=2	76.2685	192.18	1;2	_________MPEPTKSAPAPKKGSKKAVTKA	X;X;X;X;X;X;X;X;X;X;X;X;X;X;X;ADP-ribosylation (CDEHKRSTY);X;X;X;X;ADP-ribosylation (CDEHKRSTY);ADP-ribosylation (CDEHKRSTY);X;ADP-ribosylation (CDEHKRSTY);X;X;X;X;X;X;X	XXXXXXXXXXPPPPPPPPPPPPPPPPPPPPX	S(1)APAPKKGSKKAVTK	S(76.27)APAPK(-76.27)K(-104.66)GS(-145.29)K(-164.91)K(-175.56)AVT(-191.92)K(-192.18)	1	4	-0.18134	By MS/MS	By MS/MS	By MS/MS	By MS/MS	By MS/MS	By MS/MS
Q7Z3E1	388	Y	TIPARP	TCDD-inducible poly [ADP-ribose] polymerase	0.999778	8.75e-29	261.35	251.08			3052210000	3950210000	138055000	2705776000	9332;9342;9345;9348;9351;9333;9328;9325;9304;9324;9311;9330;9308;9313;9291;9288;9293;9294;9303			2949720000	3190680000	138055000	2540710000			102490000	759530000		165066000	G5E9W1	_FM(ox)M(ox)WNNHY(ad)ILHNSFFR_;_FM(ox)MWNNHY(ad)ILHNSFFR_;_FM(ox)MWNNHY(ad)ILHNSFFRR_;_FMM(ox)WNNHY(ad)ILHNSFFR_;_FMMWNNHY(ad)ILHNSFFR_;_FMMWNNHY(ad)ILHNSFFRR_	G5E9W1	TIPARP	Protein mono-ADP-ribosyltransferase TIPARP (Fragment) OS=Homo sapiens OX=9606 GN=TIPARP PE=1 SV=1;Protein mono-ADP-ribosyltransferase TIPARP OS=Homo sapiens OX=9606 GN=TIPARP PE=1 SV=1;Poly [ADP-ribose] polymerase (Fragment) OS=Homo sapiens OX=9606 GN=TIPA	36.5639	256.77	1	SRGLKEVRFMMWNNHYILHNSFFRREIKRRP	ADP-ribosylation (CDEHKRSTY);ADP-ribosylation (CDEHKRSTY);X;X;X;X;X;X;X;Oxidation (M);Oxidation (M);X;X;X;X;ADP-ribosylation (CDEHKRSTY);X;X;X;X;X;X;X;X;ADP-ribosylation (CDEHKRSTY);X;X;X;ADP-ribosylation (CDEHKRSTY);X;X	XXXXXXXXPPPPPPPPPPPPPPPPPXXXXXX	FMMWNNHY(1)ILHNSFFRR	FMMWNNH(-36.56)Y(36.56)ILH(-59.82)NS(-113.86)FFR(-170.28)R(-256.77)	8	4	-0.56722			By MS/MS	By MS/MS	By MS/MS	By MS/MS
P10412	150	S	HIST1H1E	Histone H1.4	0.999974	1.82e-18	226.53	188.35	2068874000	858856000	2688521000	1107339000	1523680000	3712960000	3959;3963;3964;20081;20087;20110;39207;39208;3960;3962;20085;20106;20108;20115;20116;20117;20118;20119;39209;20091;20111;20083;20089;20109;20086;20084;20092;3969;20107;3970;3966;3967;3961;20080;20090;20082;3968	871924000	858856000	876331000	1000970000	351680000	1046020000	1196950000		1812190000	106369000	1172000000	2666940000	P10412	_ATGAATPKKS(ad)AK_;_ATGAATPKKS(ad)AKK_;_ATGAATPKKS(ad)AKKTPK_;_KATGAATPKKS(ad)AK_;_KATGAATPKKS(ad)AKK_;_KATGAATPKKS(ad)AKKTPK_;_S(ad)AKKTPK_;_S(ad)AKKTPKK_	P10412	HIST1H1E	Histone H1.4 OS=Homo sapiens OX=9606 GN=HIST1H1E PE=1 SV=2	45.9283	214.64	1;2	AKKPKKATGAATPKKSAKKTPKKAKKPAAAA	X;X;X;X;X;X;X;X;X;X;X;X;X;X;ADP-ribosylation (CDEHKRSTY);ADP-ribosylation (CDEHKRSTY);X;ADP-ribosylation (CDEHKRSTY);X;X;X;X;X;X;X;X;X;X;X;X;X	XXXXXPPPPPPPPPPPPPPPPPPXXXXXXXX	ATGAATPKKS(1)AK	AT(-200.11)GAAT(-114.33)PK(-77.09)K(-45.93)S(45.93)AK(-214.64)	10	3	-0.20737	By MS/MS	By MS/MS	By MS/MS	By MS/MS	By MS/MS	By MS/MS
P16403	150	S	HIST1H1C	Histone H1.2	0.999925	1.69e-16	213.67	196.32	2465356670	3004450000	2412092010	1495226170	501406000	4881020000	132;133;143;19686;19687;19711;128;19688;19689;19690;19692;19693;19694;19704;131;129;130;141;19685;19691;140;142;137;144;139;19705;134;135;19701;138;19703;19702	2462060000	3004450000	2410180000	1494610000	501406000	4881020000	3296670		1912010	616170			P16403	_AAGGATPKKS(ad)AK_;_AAGGATPKKS(ad)AKK_;_AAGGATPKKS(ad)AKKTPK_;_KAAGGATPKKS(ad)AK_;_KAAGGATPKKS(ad)AKK_;_KAAGGATPKKS(ad)AKKTPK_	P16403	HIST1H1C	Histone H1.2 OS=Homo sapiens OX=9606 GN=HIST1H1C PE=1 SV=2	44.2731	213.67	1;2	AKKPKKAAGGATPKKSAKKTPKKAKKPAAAT	X;X;X;X;X;X;X;X;X;X;X;X;X;X;ADP-ribosylation (CDEHKRSTY);ADP-ribosylation (CDEHKRSTY);X;X;X;X;X;X;X;X;X;X;X;X;X;X;X	XXXXXPPPPPPPPPPPPPPPPPPXXXXXXXX	AAGGATPKKS(1)AKKTPK	AAGGAT(-103.32)PK(-74.94)K(-44.27)S(44.27)AK(-44.27)K(-74.09)T(-84.29)PK(-213.67)	10	4	0.27601	By MS/MS	By MS/MS	By MS/MS	By MS/MS	By MS/MS	By MS/MS
Q7Z3E1	564	Y	TIPARP	TCDD-inducible poly [ADP-ribose] polymerase	0.999876	8.86e-34	303.31	286.7			2339200000	2807290000	1018140000	1839918000	14719;14728;14731;14736;14729;14732;14734;14688;14707;14709;14686;14701;14704;14722;14694;14690;14720;14691			2339200000	2807290000	1018140000	1816960000						22958000	G5E9W1	_HATM(ox)FGQGSY(ad)FAK_;_HATM(ox)FGQGSY(ad)FAKK_;_HATMFGQGSY(ad)FAK_;_HATMFGQGSY(ad)FAKK_	G5E9W1	TIPARP	Protein mono-ADP-ribosyltransferase TIPARP (Fragment) OS=Homo sapiens OX=9606 GN=TIPARP PE=1 SV=1;Protein mono-ADP-ribosyltransferase TIPARP OS=Homo sapiens OX=9606 GN=TIPARP PE=1 SV=1;Poly [ADP-ribose] polymerase (Fragment) OS=Homo sapiens OX=9606 GN=TIPA	39.0697	253.88	1	PRVCGKHATMFGQGSYFAKKASYSHNFSKKS	X;ADP-ribosylation (CDEHKRSTY);X;Carbamidomethyl (C);ADP-ribosylation (CDEHKRSTY);X;X;X;X;X;Oxidation (M);X;X;X;X;X;ADP-ribosylation (CDEHKRSTY);X;X;X;ADP-ribosylation (CDEHKRSTY);X;ADP-ribosylation (CDEHKRSTY);ADP-ribosylation (CDEHKRSTY);X;ADP-ribosylation (CDEHKRSTY);X;X;X;X;X;ADP-ribosylation (CDEHKRSTY)	XXXXXXPPPPPPPPPPPPPPPPPPPPPPPXX	HATMFGQGSY(1)FAKK	H(-230.25)AT(-208.01)MFGQGS(-39.07)Y(39.07)FAK(-87.41)K(-253.88)	10	3	-0.07243			By MS/MS	By MS/MS	By MS/MS	By MS/MS
Q7Z3E1	513	Y	TIPARP	TCDD-inducible poly [ADP-ribose] polymerase	0.999437	3.66e-06	144.77	89.418			2078862000	2706946000	521212000	1616910000	21233;21235;21238;21250;20332;36202;21240;21242;20333;53337;36194;21231;36190;36201;21236;21239;21229;21230;21227;21228;21237;36193;36189;36195;21249;36199;21232;21248			722472000	2391850000	521212000	511230000			1356390000	315096000		1105680000	G5E9W1	_KEY(ad)MNRK_;_KKEY(ad)M(ox)NR_;_KKEY(ad)M(ox)NRK_;_KKEY(ad)MNR_;_KKEY(ad)MNRK_;_RKKEY(ad)M(ox)NR_;_RKKEY(ad)M(ox)NRK_;_RKKEY(ad)MNR_;_RKKEY(ad)MNRK_;_YKRKKEY(ad)M(ox)NRK_	G5E9W1	TIPARP	Protein mono-ADP-ribosyltransferase TIPARP (Fragment) OS=Homo sapiens OX=9606 GN=TIPARP PE=1 SV=1;Protein mono-ADP-ribosyltransferase TIPARP OS=Homo sapiens OX=9606 GN=TIPARP PE=1 SV=1;Poly [ADP-ribose] polymerase (Fragment) OS=Homo sapiens OX=9606 GN=TIPA	32.503	128.12	1	VQNQFLWEKYKRKKEYMNRKMFGRDRIINER	X;X;X;X;X;X;X;ADP-ribosylation (CDEHKRSTY);ADP-ribosylation (CDEHKRSTY);ADP-ribosylation (CDEHKRSTY);X;X;X;X;X;ADP-ribosylation (CDEHKRSTY);Oxidation (M);X;X;ADP-ribosylation (CDEHKRSTY);Oxidation (M);X;X;ADP-ribosylation (CDEHKRSTY);X;ADP-ribosylation (CDEHKRSTY);X;X;X;X;ADP-ribosylation (CDEHKRSTY)	XXXXXXXXXPPPPPPPPPPPXXXXXXXXXXX	KKE(0.001)Y(0.999)MNRK	K(-81.74)K(-58.86)E(-32.5)Y(32.5)MNR(-66.34)K(-128.12)	4	4	-0.21209			By MS/MS	By MS/MS	By MS/MS	By MS/MS
P04406	80	R	GAPDH	Glyceraldehyde-3-phosphate dehydrogenase	0.980322	1.02e-07	146.3	119.55			1576790000	750719000	395946000	1834460000	815;27742;27739;27740;814;27744;27741;27743;27745			1576790000	582229000	395946000	1595690000				168490000		238770000	P04406	_AENGKLVINGNPITIFQER(ad)DPSK_;_LVINGNPITIFQER(ad)DPSK_;_LVINGNPITIFQER(ad)DPSKIK_	P04406	GAPDH	Glyceraldehyde-3-phosphate dehydrogenase OS=Homo sapiens OX=9606 GN=GAPDH PE=1 SV=3;Isoform 2 of Glyceraldehyde-3-phosphate dehydrogenase OS=Homo sapiens OX=9606 GN=GAPDH	18.0134	145.02	1	GKLVINGNPITIFQERDPSKIKWGDAGAEYV	X;X;X;X;X;X;X;X;X;X;X;X;X;X;X;ADP-ribosylation (CDEHKRSTY);X;X;X;X;X;X;X;X;X;X;X;X;X;X;X	PPPPPPPPPPPPPPPPPPPPPPXXXXXXXXX	AENGKLVINGNPITIFQE(0.002)R(0.98)D(0.015)PS(0.002)K	AE(-141.56)NGK(-133.74)LVINGNPIT(-87.78)IFQE(-26.7)R(18.01)D(-18.01)PS(-26.7)K(-145.02)	19	3	-1.1733			By MS/MS	By MS/MS	By MS/MS	By MS/MS
Q7Z3E1	354	H	TIPARP	TCDD-inducible poly [ADP-ribose] polymerase	0.997702	2.49e-33	289.75	270.7			1540230000	1009660000	536870000	1342990000	5222;5234;5229;5231;5233;5228;5221;8413;8419			1540230000	1009660000	536870000	1342990000							G5E9W1	_DH(ad)FGWREYPESVIR_;_FFCRDH(ad)FGWREYPESVIR_	G5E9W1	TIPARP	Protein mono-ADP-ribosyltransferase TIPARP (Fragment) OS=Homo sapiens OX=9606 GN=TIPARP PE=1 SV=1;Protein mono-ADP-ribosyltransferase TIPARP OS=Homo sapiens OX=9606 GN=TIPARP PE=1 SV=1;Poly [ADP-ribose] polymerase (Fragment) OS=Homo sapiens OX=9606 GN=TIPA	26.377	277.06	1	VNSIYHTVWKFFCRDHFGWREYPESVIRLIE	X;X;ADP-ribosylation (CDEHKRSTY);X;ADP-ribosylation (CDEHKRSTY);ADP-ribosylation (CDEHKRSTY);X;X;X;X;X;X;X;X;X;ADP-ribosylation (CDEHKRSTY);X;X;X;X;X;X;X;X;X;X;X;ADP-ribosylation (CDEHKRSTY);X;X;X	XXXXXXXXXXPPPPPPPPPPPPPPPPPPXXX	D(0.002)H(0.998)FGWREYPESVIR	D(-26.38)H(26.38)FGWR(-152.55)E(-171.87)Y(-198.56)PE(-229.43)S(-248.52)VIR(-277.06)	2	4	0.24557			By MS/MS	By MS/MS	By MS/MS	By MS/MS
Q7Z3E1	351	C	TIPARP	TCDD-inducible poly [ADP-ribose] polymerase	0.997823	6.83e-51	336.06	317.01			1280329000	748775000	88739000	1302544000	8414;8402;8407;8420;8403;8416;8404;8406;8408;8405;8421			1201530000	620520000	32570000	999914000			78799000	128255000	56169000	302630000	G5E9W1	_FFC(ad)RDHFGWR_;_FFC(ad)RDHFGWREYPESVIR_	G5E9W1	TIPARP	Protein mono-ADP-ribosyltransferase TIPARP (Fragment) OS=Homo sapiens OX=9606 GN=TIPARP PE=1 SV=1;Protein mono-ADP-ribosyltransferase TIPARP OS=Homo sapiens OX=9606 GN=TIPARP PE=1 SV=1;Poly [ADP-ribose] polymerase (Fragment) OS=Homo sapiens OX=9606 GN=TIPA	26.6123	335.75	1	SSNVNSIYHTVWKFFCRDHFGWREYPESVIR	ADP-ribosylation (CDEHKRSTY);X;X;X;X;ADP-ribosylation (CDEHKRSTY);X;ADP-ribosylation (CDEHKRSTY);ADP-ribosylation (CDEHKRSTY);X;X;X;X;X;X;ADP-ribosylation (CDEHKRSTY);X;X;ADP-ribosylation (CDEHKRSTY);X;X;X;ADP-ribosylation (CDEHKRSTY);X;ADP-ribosylation (CDEHKRSTY);X;X;X;X;X;ADP-ribosylation (CDEHKRSTY)	XXXXXXXXXXXXXPPPPPPPPPPPPPPPPPP	FFC(0.998)R(0.002)DHFGWREYPESVIR	FFC(26.61)R(-26.61)D(-77.39)H(-113.3)FGWR(-227.78)E(-253.74)Y(-277.06)PE(-297.38)S(-314.19)VIR(-335.75)	3	4	-0.21729			By MS/MS	By MS/MS	By MS/MS	By MS/MS
P42771	72	C	CDKN2A	Cyclin-dependent kinase inhibitor 2A;Cyclin-dependent kinase 4 inhibitor B	0.999519	1.37e-24	220.46	209.37			1277890000	1034320000		1180930000	48638;48637;48636;48640			1154400000	1034320000		1057700000			123490000			123230000	P42771	_VAELLLLHGAEPNC(ad)ADPATLTRPVHDAAR_	P42771	CDKN2A;CDKN2B	Cyclin-dependent kinase inhibitor 2A OS=Homo sapiens OX=9606 GN=CDKN2A PE=1 SV=2;Isoform 5 of Cyclin-dependent kinase inhibitor 2A OS=Homo sapiens OX=9606 GN=CDKN2A;Cyclin-dependent kinase inhibitor 2A OS=Homo sapiens OX=9606 GN=CDKN2A PE=1 SV=1;Cyclin-dep	33.8045	220.46	1	ARVAELLLLHGAEPNCADPATLTRPVHDAAR	X;X;X;X;X;X;X;X;X;X;X;X;X;X;X;ADP-ribosylation (CDEHKRSTY);X;X;X;X;X;X;X;X;X;X;X;X;X;X;X	XXPPPPPPPPPPPPPPPPPPPPPPPPPPPPP	VAELLLLHGAEPNC(1)ADPATLTRPVHDAAR	VAE(-140.34)LLLLH(-94.67)GAE(-33.8)PNC(33.8)AD(-41.91)PAT(-72.94)LT(-96.75)R(-111.58)PVH(-118.73)D(-125.69)AAR(-220.46)	14	5	-1.0468			By MS/MS	By MS/MS		By MS/MS
P06748	143	S	NPM1	Nucleophosmin	1	3.73e-30	264.38	255.36	2613635000	420701000	1213040000	925546000	286642000	2288769000	39399;39400;39401;39403;39404;39425;39426;39429;39430;26123;39432;26127;39443;39444;26129;38148;38152;26128;26126;26124	378605000	380496000	1213040000	134748000	286642000	2223120000	2235030000	40205000		790798000		65649000	P06748;P06748-2	_LLSISGKRS(ad)APGGGSK_;_LLSISGKRS(ad)APGGGSKVPQK_;_LLSISGKRS(ad)APGGGSKVPQKK_;_RS(ad)APGGGSKVPQK_;_S(ad)APGGGSKVPQK_;_S(ad)APGGGSKVPQKK_;_S(ad)APGGGSKVPQKKVK_	P06748	NPM1	Nucleophosmin OS=Homo sapiens OX=9606 GN=NPM1 PE=1 SV=2;Isoform 3 of Nucleophosmin OS=Homo sapiens OX=9606 GN=NPM1;Nucleophosmin (Fragment) OS=Homo sapiens OX=9606 GN=NPM1 PE=1 SV=1;Isoform 2 of Nucleophosmin OS=Homo sapiens OX=9606 GN=NPM1	91.7811	143.42	1	EEEEDVKLLSISGKRSAPGGGSKVPQKKVKL	X;X;X;X;X;X;X;X;X;ADP-ribosylation (CDEHKRSTY);X;ADP-ribosylation (CDEHKRSTY);X;X;X;ADP-ribosylation (CDEHKRSTY);X;X;X;X;X;X;X;X;X;X;X;X;X;X;X	XXXXXXXPPPPPPPPPPPPPPPPPPPPPPPX	S(1)APGGGSKVPQKK	S(91.78)APGGGS(-91.78)K(-105.77)VPQK(-141.08)K(-143.42)	1	3	0.071477	By MS/MS	By MS/MS	By MS/MS	By MS/MS	By MS/MS	By MS/MS
O14654	381	C	IRS4	Insulin receptor substrate 4	0.999231	6.99e-08	172.8	159.38	11720700	3950700	1155300000	1079270000	769869000	1251150000	8389;8391;8388;38301;38303;8390;43192;43191;43189;43190;38302;38300;43193;43194;38298	10187000	3950700	1155300000	1079270000	769869000	1251150000	1533700						O14654	_FEQFC(ad)HLR_;_RSRFEQFC(ad)HLR_;_SRFEQFC(ad)HLR_	O14654	IRS4	Insulin receptor substrate 4 OS=Homo sapiens OX=9606 GN=IRS4 PE=1 SV=1	31.5934	104.2	1	LEPGGWLRRSRFEQFCHLRAIGDGEDEMLFT	X;X;X;X;X;X;X;X;X;X;X;X;X;X;X;ADP-ribosylation (CDEHKRSTY);X;X;X;X;X;X;X;X;X;X;X;X;X;X;X	XXXXXXXXPPPPPPPPPPPXXXXXXXXXXXX	FEQFC(0.999)H(0.001)LR	FE(-41.12)QFC(31.59)H(-31.59)LR(-104.2)	5	3	0.11527	By MS/MS	By MS/MS	By MS/MS	By MS/MS	By MS/MS	By MS/MS
P06748	207	S	NPM1	Nucleophosmin	0.993891	1.46e-15	213.49	194.53	2220570000	490950000	1091230000	895960000	186817000	1637020000	30394;30397;30399;30391;30392;30395;30396;30398;30393	2220570000	490950000	130920000	131190000	186817000	271120000			960310000	764770000		1365900000	P06748	_NAQKS(ad)NQNGKDSKPSSTPR_	P06748	NPM1	Nucleophosmin OS=Homo sapiens OX=9606 GN=NPM1 PE=1 SV=2;Isoform 3 of Nucleophosmin OS=Homo sapiens OX=9606 GN=NPM1	22.1139	213.49	1	VKKSIRDTPAKNAQKSNQNGKDSKPSSTPRS	X;X;X;ADP-ribosylation (CDEHKRSTY);X;X;X;X;X;X;X;X;X;X;X;ADP-ribosylation (CDEHKRSTY);X;X;X;X;X;X;X;X;X;X;ADP-ribosylation (CDEHKRSTY);X;X;X;ADP-ribosylation (CDEHKRSTY)	XXXXXXXXXXXPPPPPPPPPPPPPPPPPPPX	NAQK(0.006)S(0.994)NQNGKDSKPSSTPR	NAQK(-22.11)S(22.11)NQNGK(-119.21)D(-127.55)S(-143.39)K(-158.04)PS(-170.18)S(-180.88)T(-185.75)PR(-213.49)	5	4	-0.86248	By MS/MS	By MS/MS	By MS/MS	By MS/MS	By MS/MS	By MS/MS
Q8N257	7	S	HIST3H2BB	Histone H2B type 3-B	1	1.31e-19	241.51	217.88	2973680000	2444590000	1044587700	2052710000	237379000	1592445000	32173;32141;32142;32143;32145;32154;32176;32151;32157;32146;32161;32147;32162;32172;32171;32174;32169;32158;32150;32167;32175;32160;32152;32153;32155;32170;32156;32159;32168;32163;32144	2635030000	2444590000	1022570000	1020550000	202225000	1192650000	338650000		22017700	1032160000	35154000	399795000	Q8N257	_PDPSKS(ad)APAPK_;_PDPSKS(ad)APAPKK_;_PDPSKS(ad)APAPKKGSK_;_PDPSKS(ad)APAPKKGSKK_	Q8N257	HIST3H2BB	Histone H2B type 3-B OS=Homo sapiens OX=9606 GN=HIST3H2BB PE=1 SV=3	76.2685	192.18	1;2	_________MPDPSKSAPAPKKGSKKAVTKA	X;X;X;X;X;X;X;X;X;X;X;X;X;X;X;ADP-ribosylation (CDEHKRSTY);X;X;X;X;ADP-ribosylation (CDEHKRSTY);ADP-ribosylation (CDEHKRSTY);X;ADP-ribosylation (CDEHKRSTY);X;X;X;X;X;X;X	XXXXXXXXXXPPPPPPPPPPPPPPPPPPPPX	S(1)APAPKKGSKKAVTK	S(76.27)APAPK(-76.27)K(-104.66)GS(-145.29)K(-164.91)K(-175.56)AVT(-191.92)K(-192.18)	1	4	-0.18134	By MS/MS	By MS/MS	By MS/MS	By MS/MS	By MS/MS	By MS/MS
P0DMV8	533	R	HSPA1A	Heat shock 70 kDa protein 1B;Heat shock 70 kDa protein 1A	0.99997	1.64e-65	346.18	335.76			970834000	1206972000	143200400	808245000	30188;30191;30192;30193;53195;53196;53198;53169;30189;53193;53194;53171;53199;30183;53170;30185;30184;782;781			726561000	1022470000	141030000	437195000			244273000	184502000	2170400	371050000	A0A0G2JIW1	_AEDEVQR(ad)ER_;_MVQEAEKYKAEDEVQR(ad)ER_;_MVQEAEKYKAEDEVQR(ad)ERVSAK_;_YKAEDEVQR(ad)ER_;_YKAEDEVQR(ad)ERVSAK_	A0A0G2JIW1	HSPA1B;HSPA1A	Heat shock 70 kDa protein 1B OS=Homo sapiens OX=9606 GN=HSPA1B PE=1 SV=1;Heat shock 70 kDa protein 1B OS=Homo sapiens OX=9606 GN=HSPA1B PE=1 SV=1;Heat shock 70 kDa protein 1A OS=Homo sapiens OX=9606 GN=HSPA1A PE=1 SV=1;Isoform 2 of Heat shock 70 kDa protei	45.3143	346.18	1	MVQEAEKYKAEDEVQRERVSAKNALESYAFN	X;X;X;X;X;X;X;X;X;X;X;X;X;X;X;ADP-ribosylation (CDEHKRSTY);X;X;X;X;X;X;X;X;X;X;X;X;X;X;X	PPPPPPPPPPPPPPPPPPPPPPXXXXXXXXX	MVQEAEKYKAEDEVQR(1)ERVSAK	MVQE(-301.93)AE(-273.25)K(-259.74)Y(-231.66)K(-208.19)AE(-156.34)D(-128.07)E(-98.27)VQR(45.31)E(-45.31)R(-66.99)VS(-114.36)AK(-346.18)	16	5	-0.61425			By MS/MS	By MS/MS	By MS/MS	By MS/MS
Q15365	194	C	PCBP1	Poly(rC)-binding protein 1	0.999915	6.39e-08	146.97	146.97		14570000	932271000	973594000	927299000	1224547000	50508;50512;50501;50509;50513;50503;50510;50504;50505;50502;50500		14570000	845065000	973594000	927299000	1155630000			87206000			68917000	Q15365	_VM(ox)TIPYQPMPASSPVIC(ad)AGGQDR_;_VMTIPYQPM(ox)PASSPVIC(ad)AGGQDR_;_VMTIPYQPMPASSPVIC(ad)AGGQDR_	Q15365	PCBP1	Poly(rC)-binding protein 1 OS=Homo sapiens OX=9606 GN=PCBP1 PE=1 SV=2	41.5128	146.97	1	MTIPYQPMPASSPVICAGGQDRCSDAAGYPH	Oxidation (M);X;X;X;X;X;X;Oxidation (M);X;X;X;X;X;X;X;ADP-ribosylation (CDEHKRSTY);X;X;X;X;X;X;X;X;X;X;X;X;X;X;X	PPPPPPPPPPPPPPPPPPPPPPXXXXXXXXX	VMTIPYQPMPASSPVIC(1)AGGQDR	VMT(-118.88)IPY(-95.42)QPMPAS(-49.2)S(-41.51)PVIC(41.51)AGGQD(-56.67)R(-146.97)	17	3	-0.27079		By MS/MS	By MS/MS	By MS/MS	By MS/MS	By MS/MS
Q7Z3E1	374	R	TIPARP	TCDD-inducible poly [ADP-ribose] polymerase	0.999792	9.56e-25	250.67	216.19			918280000	632200000	386720000	600830000	25128;25129;25131;25132;25141;25142;25144;25143			918280000	632200000	386720000	600830000							G5E9W1	_LIEEANSR(ad)GLK_;_LIEEANSR(ad)GLKEVR_	G5E9W1	TIPARP	Protein mono-ADP-ribosyltransferase TIPARP (Fragment) OS=Homo sapiens OX=9606 GN=TIPARP PE=1 SV=1;Protein mono-ADP-ribosyltransferase TIPARP OS=Homo sapiens OX=9606 GN=TIPARP PE=1 SV=1;Poly [ADP-ribose] polymerase (Fragment) OS=Homo sapiens OX=9606 GN=TIPA	36.8175	172.8	1	EYPESVIRLIEEANSRGLKEVRFMMWNNHYI	X;ADP-ribosylation (CDEHKRSTY);X;X;X;X;X;X;X;X;X;X;X;X;X;ADP-ribosylation (CDEHKRSTY);X;X;X;ADP-ribosylation (CDEHKRSTY);X;ADP-ribosylation (CDEHKRSTY);X;Oxidation (M);Oxidation (M);X;X;X;ADP-ribosylation (CDEHKRSTY);ADP-ribosylation (CDEHKRSTY);X	XXXXXXXXPPPPPPPPPPPPPPXXXXXXXXX	LIEEANSR(1)GLK	LIE(-140.37)E(-118.46)ANS(-36.82)R(36.82)GLK(-172.8)	8	3	-0.093911			By MS/MS	By MS/MS	By MS/MS	By MS/MS
P16402	205	S	HIST1H1D	Histone H1.3	0.999996	2.98e-07	142.12	130.58	3285414000	3852170000	827875000	1250214000	233912000	1588291000	40615;40616;40618;40619;40620;250;258;260;40617;245;247;251;262;248;261;249;263;246;244;40623;257;40621;264;265;259	2385190000	3852170000	717626000	1182580000	233912000	1296590000	900224000		110249000	67634000		291701000	P16402	_AAKPKS(ad)GKPK_;_AAKPKS(ad)GKPKVTK_;_S(ad)GKPKVTK_;_S(ad)GKPKVTKAK_	P16402	HIST1H1D	Histone H1.3 OS=Homo sapiens OX=9606 GN=HIST1H1D PE=1 SV=2	54.2711	116.05	1;2	PAKAKAPKPKAAKPKSGKPKVTKAKKAAPKK	X;X;X;X;X;X;X;X;X;X;X;X;X;X;ADP-ribosylation (CDEHKRSTY);ADP-ribosylation (CDEHKRSTY);X;X;X;X;X;X;X;X;X;X;X;X;X;X;X	XXXXXXXXXXPPPPPPPPPPPPPPPXXXXXX	S(1)GKPKVTK	S(54.27)GK(-54.27)PK(-80.4)VT(-108.18)K(-116.05)	1	3	-0.16471	By MS/MS	By MS/MS	By MS/MS	By MS/MS	By MS/MS	By MS/MS
Q7Z3E1	523	R	TIPARP	TCDD-inducible poly [ADP-ribose] polymerase	0.99887	5.68e-11	195.51	169.78			825618900	786222200	244854000	974808000	5824;28628;28622;5823;22020;28626;22012;28619;22010;28624;22019;5827;22016;28618;5825;22026;5826;22011;28616;22025;22017			813352000	732953000	244854000	753225000			12266900	53269200		221583000	G5E9W1	_DR(ad)IINER_;_KM(ox)FGRDR(ad)IINER_;_KMFGRDR(ad)IINER_;_M(ox)FGRDR(ad)IINER_;_MFGRDR(ad)IINER_	G5E9W1	TIPARP	Protein mono-ADP-ribosyltransferase TIPARP (Fragment) OS=Homo sapiens OX=9606 GN=TIPARP PE=1 SV=1;Protein mono-ADP-ribosyltransferase TIPARP OS=Homo sapiens OX=9606 GN=TIPARP PE=1 SV=1;Poly [ADP-ribose] polymerase (Fragment) OS=Homo sapiens OX=9606 GN=TIPA	29.4665	87.696	1	KRKKEYMNRKMFGRDRIINERHLFHGTSQDV	X;X;ADP-ribosylation (CDEHKRSTY);X;X;ADP-ribosylation (CDEHKRSTY);Oxidation (M);X;ADP-ribosylation (CDEHKRSTY);X;Oxidation (M);X;X;X;X;ADP-ribosylation (CDEHKRSTY);X;X;X;X;ADP-ribosylation (CDEHKRSTY);ADP-ribosylation (CDEHKRSTY);X;X;ADP-ribosylation (CDEHKRSTY);X;X;X;X;X;X	XXXXXXXXXPPPPPPPPPPPPXXXXXXXXXX	D(0.001)R(0.999)IINER	D(-29.47)R(29.47)IINE(-59.92)R(-87.7)	2	3	0.41862			By MS/MS	By MS/MS	By MS/MS	By MS/MS
Q7Z3E1	478	Y	TIPARP	TCDD-inducible poly [ADP-ribose] polymerase	1	0.00026879	104.2	91.701			819553000	1082622000	263959000	455942000	17652;17655;17657;17660;17654;17659;45092;45096			819553000	313480000	263959000	442360000				769142000		13582000	G5E9W1	_IIY(ad)NLFHK_;_SYRIIY(ad)NLFHK_	G5E9W1	TIPARP	Protein mono-ADP-ribosyltransferase TIPARP (Fragment) OS=Homo sapiens OX=9606 GN=TIPARP PE=1 SV=1;Protein mono-ADP-ribosyltransferase TIPARP OS=Homo sapiens OX=9606 GN=TIPARP PE=1 SV=1;Poly [ADP-ribose] polymerase (Fragment) OS=Homo sapiens OX=9606 GN=TIPA	96.1273	104.2	1	IQVPVSAEDKSYRIIYNLFHKTVPEFKYRIL	X;X;X;X;X;X;X;X;X;X;X;X;X;X;X;ADP-ribosylation (CDEHKRSTY);X;X;X;X;X;X;X;X;X;X;X;ADP-ribosylation (CDEHKRSTY);ADP-ribosylation (CDEHKRSTY);X;X	XXXXXXXXXXPPPPPPPPPPPXXXXXXXXXX	IIY(1)NLFHK	IIY(96.13)NLFH(-96.13)K(-104.2)	3	3	0.058561			By MS/MS	By MS/MS	By MS/MS	By MS/MS
P62701	41	C	RPS4X	40S ribosomal protein S4, X isoform	0.931782	9.17e-09	181.31	155.58			781890000	337450000		763460000	26694;26695;26697			781890000	337450000		763460000							P62701	_LREC(ad)LPLIIFLR_	P62701	RPS4X	40S ribosomal protein S4, X isoform OS=Homo sapiens OX=9606 GN=RPS4X PE=1 SV=2	11.6612	181.31	1	VFAPRPSTGPHKLRECLPLIIFLRNRLKYAL	X;X;X;X;ADP-ribosylation (CDEHKRSTY);X;X;X;X;X;X;X;X;X;X;ADP-ribosylation (CDEHKRSTY);X;X;X;X;X;X;X;X;X;X;X;X;ADP-ribosylation (CDEHKRSTY);X;X	XXXXXXXXXXXXPPPPPPPPPPPPXXXXXXX	LR(0.005)E(0.064)C(0.932)LPLIIFLR	LR(-23.01)E(-11.66)C(11.66)LPLIIFLR(-181.31)	4	3	-0.50028			By MS/MS	By MS/MS		By MS/MS
P68104	454	S	EEF1A1	Putative elongation factor 1-alpha-like 3;Elongation factor 1-alpha 1	0.999981	4.05e-16	206.2	184.3	5670964000	4865540000	732808000	1298919000	180455000	407023400	105;106;107;108;109;110;19677;19678;19679;117;19674;4155;19673;51318;115;19683;119;51317;51320;114;116;4157;19676;51319;113;118;4156;19675;4154;111	5271050000	4865540000	261033000	1178590000	149784000	377020000	399914000		471775000	120329000	30671000	30003400	Q5VTE0	_AAGAGKVTKS(ad)AQK_;_AAGAGKVTKS(ad)AQKAQK_;_AVDKKAAGAGKVTKS(ad)AQK_;_KAAGAGKVTKS(ad)AQK_;_KAAGAGKVTKS(ad)AQKAQK_;_VTKS(ad)AQKAQK_	Q5VTE0	EEF1A1P5;EEF1A1	Putative elongation factor 1-alpha-like 3 OS=Homo sapiens OX=9606 GN=EEF1A1P5 PE=5 SV=1;Elongation factor 1-alpha 1 OS=Homo sapiens OX=9606 GN=EEF1A1 PE=1 SV=1;Elongation factor 1-alpha 1 OS=Homo sapiens OX=9606 GN=EEF1A1 PE=1 SV=1;Isoform 2 of Elongation	47.237	202.32	1	KAVDKKAAGAGKVTKSAQKAQKAK_______	X;X;X;X;X;X;X;X;X;X;X;X;X;X;X;ADP-ribosylation (CDEHKRSTY);X;X;X;X;X;X;X;X;X;X;X;X;X;X;X	XPPPPPPPPPPPPPPPPPPPPPXXXXXXXXX	KAAGAGKVTKS(1)AQK	K(-193.06)AAGAGK(-118.63)VT(-79.68)K(-47.24)S(47.24)AQK(-202.32)	11	3	0.041198	By MS/MS	By MS/MS	By MS/MS	By MS/MS	By MS/MS	By MS/MS
P17096	8	S	HMGA1	High mobility group protein HMG-I/HMG-Y	0.999491	3.29e-52	323.2	308.78	1082782400	537157100	685593000	845074800	330043000	1002074000	39907;39920;44047;44055;44071;44048;44051;39913;39909;44044;44052;44053;44050;39926;39911;39919;39914;44043;39924;44070;44054;39904;39931;44075;39906;44049;44056;39912;44058;39903;39902	1082290000	535299000	587403000	752282000	315277000	795871000	492400	1858100	98190000	92792800	14766000	206203000	P17096;P17096-2	_(ac)SESSSKS(ad)SQPLASK_;_(ac)SESSSKS(ad)SQPLASKQEK_;_(ac)SESSSKS(ad)SQPLASKQEKDGTEK_;_(ac)SESSSKS(ad)SQPLASKQEKDGTEKR_;_(ac)SESSSKS(ad)SQPLASKQEKDGTEKRGR_;_S(ad)SQPLASK_;_S(ad)SQPLASKQEK_;_S(ad)SQPLASKQEKDGTEK_;_S(ad)SQPLASKQEKDGTEKR_;_S(ad)SQPLASKQEKDGTEKRGR_	P17096	HMGA1	High mobility group protein HMG-I/HMG-Y OS=Homo sapiens OX=9606 GN=HMGA1 PE=1 SV=3;Isoform HMG-R of High mobility group protein HMG-I/HMG-Y OS=Homo sapiens OX=9606 GN=HMGA1;Uncharacterized protein C2orf81 (Fragment) OS=Homo sapiens OX=9606 GN=C2orf81 PE=1	35.9508	314.29	1	________MSESSSKSSQPLASKQEKDGTEK	X;X;X;X;X;X;X;X;X;X;X;X;X;X;X;ADP-ribosylation (CDEHKRSTY);X;X;X;X;X;X;X;X;X;X;X;X;X;X;X	XXXXXXXXXPPPPPPPPPPPPPPPPPPPPPP	SESSSKS(0.999)SQPLASKQEKDGTEK	S(-134.25)E(-124.06)S(-103.13)S(-81.45)S(-59.06)K(-35.95)S(35.95)S(-35.95)QPLAS(-123.22)K(-151.87)QE(-182.15)K(-199.83)D(-216.6)GT(-239.93)E(-254.16)K(-314.29)	7	4	0.37456	By MS/MS	By MS/MS	By MS/MS	By MS/MS	By MS/MS	By MS/MS
Q96PK6	108	C	RBM14	RNA-binding protein 14	0.989069	4.51e-22	227.67	227.67			629634000	709670000	500630000	759705000	49600;49599;49602;13676;49597;49606;13677;49604;49603;49615;49608;49609;49614;49598;49607			629634000	709670000	477308000	463050000					23322000	296655000	Q96PK6	_GRVIEC(ad)DVVKDYAFVHMEK_;_VIEC(ad)DVVKDYAFVHM(ox)EK_;_VIEC(ad)DVVKDYAFVHMEK_	Q96PK6	RBM14;RBM14-RBM4	RNA-binding protein 14 OS=Homo sapiens OX=9606 GN=RBM14 PE=1 SV=2;Isoform 2 of RNA-binding protein 14 OS=Homo sapiens OX=9606 GN=RBM14;Protein RBM14-RBM4 OS=Homo sapiens OX=9606 GN=RBM14-RBM4 PE=4 SV=1;RNA-binding protein 14 OS=Homo sapiens OX=9606 GN=RBM1	22.5759	225.85	1	QELRSLFERRGRVIECDVVKDYAFVHMEKEA	X;X;X;ADP-ribosylation (CDEHKRSTY);X;X;X;X;ADP-ribosylation (CDEHKRSTY);X;X;X;X;X;X;ADP-ribosylation (CDEHKRSTY);X;X;X;X;X;X;X;X;X;X;Oxidation (M);X;X;X;X	XXXXXXXXXXPPPPPPPPPPPPPPPPPPPPP	VIE(0.005)C(0.989)D(0.005)VVKDYAFVHMEK	VIE(-22.58)C(22.58)D(-22.58)VVK(-84.89)D(-112.83)Y(-138.46)AFVH(-191.2)ME(-214.92)K(-225.85)	4	3	-0.55976			By MS/MS	By MS/MS	By MS/MS	By MS/MS
Q7Z3E1	573	H	TIPARP	TCDD-inducible poly [ADP-ribose] polymerase	0.999967	2.37e-07	167.93	167.93			600877000	525306000	48182700	328599000	3883;3901;3881;3894;3896;20062;20065;20066;3888;3885;20043;3897;3899;3886			119435000	242241000	48182700	328599000			481442000	283065000			G5E9W1	_ASYSH(ad)NFSK_;_ASYSH(ad)NFSKK_;_KASYSH(ad)NFSK_;_KASYSH(ad)NFSKK_	G5E9W1	TIPARP	Protein mono-ADP-ribosyltransferase TIPARP (Fragment) OS=Homo sapiens OX=9606 GN=TIPARP PE=1 SV=1;Protein mono-ADP-ribosyltransferase TIPARP OS=Homo sapiens OX=9606 GN=TIPARP PE=1 SV=1;Poly [ADP-ribose] polymerase (Fragment) OS=Homo sapiens OX=9606 GN=TIPA	44.8217	167.93	1;2	MFGQGSYFAKKASYSHNFSKKSSKGVHFMFL	Oxidation (M);X;X;X;X;ADP-ribosylation (CDEHKRSTY);ADP-ribosylation (CDEHKRSTY);X;X;X;X;X;ADP-ribosylation (CDEHKRSTY);X;X;ADP-ribosylation (CDEHKRSTY);X;X;X;X;X;X;X;ADP-ribosylation (CDEHKRSTY);X;X;ADP-ribosylation (CDEHKRSTY);X;Oxidation (M);X;X	XXXXXXXXXXPPPPPPPPPPPXXXXXXXXXX	ASYSH(1)NFSKK	AS(-92.52)Y(-83.25)S(-44.82)H(44.82)NFS(-64.98)K(-92.37)K(-167.93)	5	3	0.042621			By MS/MS	By MS/MS	By MS/MS	By MS/MS
P62701	65	C	RPS4X	40S ribosomal protein S4, X isoform;40S ribosomal protein S4, Y isoform 1	0.999996	1.05e-25	260.7	229.05			588798700	1153370000	584753000	785512000	52433;52435;52436;52437;52430;52431;52432;52434;25652;25653;52439;52438;25654			519691000	1153370000	584753000	672724000			69107700			112788000	P62701	_LKYALTGDEVKKIC(ad)MQR_;_YALTGDEVKKIC(ad)M(ox)QR_;_YALTGDEVKKIC(ad)MQR_	P62701	RPS4X;RPS4Y1	40S ribosomal protein S4, X isoform OS=Homo sapiens OX=9606 GN=RPS4X PE=1 SV=2;40S ribosomal protein S4, Y isoform 1 (Fragment) OS=Homo sapiens OX=9606 GN=RPS4Y1 PE=1 SV=1;40S ribosomal protein S4, Y isoform 1 OS=Homo sapiens OX=9606 GN=RPS4Y1 PE=1 SV=2	53.7567	228.7	1	NRLKYALTGDEVKKICMQRFIKIDGKVRTDI	X;X;X;X;ADP-ribosylation (CDEHKRSTY);X;X;X;X;X;X;X;X;X;X;ADP-ribosylation (CDEHKRSTY);Oxidation (M);X;X;X;X;X;X;X;X;X;X;X;X;X;X	XXPPPPPPPPPPPPPPPPPXXXXXXXXXXXX	YALTGDEVKKIC(1)MQR	Y(-223.57)ALT(-195.34)GD(-164.29)E(-142.72)VK(-81.74)K(-53.76)IC(53.76)MQR(-228.7)	12	4	-0.33042			By MS/MS	By MS/MS	By MS/MS	By MS/MS
P07910	171	S	HNRNPC	Heterogeneous nuclear ribonucleoproteins C1/C2;Heterogeneous nuclear ribonucleoprotein C-like 4;Heterogeneous nuclear ribonucleoprotein C-like 1;Heterogeneous nuclear ribonucleoprotein C-like 3;Heterogeneous nuclear ribonucleoprotein C-like 2	0.999705	3.05e-06	150.27	137.91	1498510000	1057140000	570405000	596486270	87216000	1148050500	35342;35345;35341;35343;35344;12367;12372;12370;12371;35346;12369;35347	1498510000	1057140000	570405000	592595000	87216000	1139530000				3891270		8520500	G3V576	_GKS(ad)GFNSK_;_RGKS(ad)GFNSK_	G3V576	HNRNPC;HNRNPCL4;HNRNPCL1;HNRNPCL3;HNRNPCL2	Heterogeneous nuclear ribonucleoproteins C1/C2 OS=Homo sapiens OX=9606 GN=HNRNPC PE=1 SV=1;Heterogeneous nuclear ribonucleoproteins C1/C2 (Fragment) OS=Homo sapiens OX=9606 GN=HNRNPC PE=1 SV=1;Heterogeneous nuclear ribonucleoproteins C1/C2 OS=Homo sapiens	35.2987	150.27	1;2	SKRQRVSGNTSRRGKSGFNSKSGQRGSSKSG	X;X;ADP-ribosylation (CDEHKRSTY);X;X;X;ADP-ribosylation (CDEHKRSTY);X;X;X;X;X;X;X;ADP-ribosylation (CDEHKRSTY);ADP-ribosylation (CDEHKRSTY);X;X;X;X;X;X;X;X;X;X;X;X;ADP-ribosylation (CDEHKRSTY);ADP-ribosylation (CDEHKRSTY);X	XXXXXXXXXXXXPPPPPPPPPXXXXXXXXXX	RGKS(1)GFNSK	R(-75.73)GK(-35.3)S(35.3)GFNS(-118.79)K(-150.27)	4	3	-0.88023	By MS/MS	By MS/MS	By MS/MS	By MS/MS	By MS/MS	By MS/MS
P68431	29	S	HIST1H3A	Histone H3.2;Histone H3.1;Histone H3	1	1.37e-28	265.53	249.18	1407384000	814543000	559169400	896739500	754652000	3614620000	412;413;415;417;39363;39385;39386;39387;39389;39391;39392;39393;39395;39397;416;39390;418;419;39396;422;421;39394;420;414;22746;22743;22744;39388	1383570000	814543000	527425000	874941000	754652000	3614620000	23814000		31744400	21798500			Q71DI3;Q5TEC6	_AARKS(ad)APATGGVK_;_AARKS(ad)APATGGVKKPHR_;_KS(ad)APATGGVK_;_KS(ad)APATGGVKKPHR_;_S(ad)APATGGVK_;_S(ad)APATGGVKKPHR_;_S(ad)APATGGVKKPHRYRPGTVALR_	Q71DI3	HIST2H3A;HIST1H3A;HIST2H3PS2	Histone H3.2 OS=Homo sapiens OX=9606 GN=HIST2H3A PE=1 SV=3;Histone H3.1 OS=Homo sapiens OX=9606 GN=HIST1H3A PE=1 SV=2;Histone H3 OS=Homo sapiens OX=9606 GN=HIST2H3PS2 PE=1 SV=1	84.2262	203.61	1	GKAPRKQLATKAARKSAPATGGVKKPHRYRP	X;X;X;X;X;X;X;X;X;X;X;X;X;X;X;ADP-ribosylation (CDEHKRSTY);X;X;X;X;X;X;X;X;X;X;X;X;X;X;X	XXXXXXXXXXXPPPPPPPPPPPPPPPPPPPP	S(1)APATGGVKKPHR	S(84.23)APAT(-84.23)GGVK(-177.79)K(-188.73)PH(-201.79)R(-203.61)	1	4	-0.15909	By MS/MS	By MS/MS	By MS/MS	By MS/MS	By MS/MS	By MS/MS
P62701	124	C	RPS4X	40S ribosomal protein S4, X isoform;40S ribosomal protein S4, Y isoform 2;40S ribosomal protein S4, Y isoform 1	0.999998	2.61e-15	216.34	207.32			548163000	789082000	253031400	454290400	19062;19063;19064;19065;19066;19085;19080;19081;53251;53253;53252;53250;19084;19077;19082;19078;19079			506045000	767498000	244384000	426926000			42118000	21584000	8647400	27364400	P62701	_ITPEEAKYKLC(ad)K_;_ITPEEAKYKLC(ad)KVR_;_ITPEEAKYKLC(ad)KVRK_;_YKLC(ad)KVR_	P62701	RPS4X;RPS4Y2;RPS4Y1	40S ribosomal protein S4, X isoform OS=Homo sapiens OX=9606 GN=RPS4X PE=1 SV=2;40S ribosomal protein S4, Y isoform 2 OS=Homo sapiens OX=9606 GN=RPS4Y2 PE=2 SV=3;40S ribosomal protein S4, Y isoform 1 (Fragment) OS=Homo sapiens OX=9606 GN=RPS4Y1 PE=1 SV=1;40	58.0042	174.24	1	FAVHRITPEEAKYKLCKVRKIFVGTKGIPHL	X;X;X;X;X;X;X;X;X;X;X;X;X;X;X;ADP-ribosylation (CDEHKRSTY);X;X;X;X;X;X;X;X;X;X;X;X;X;ADP-ribosylation (CDEHKRSTY);X	XXXXXPPPPPPPPPPPPPPPXXXXXXXXXXX	ITPEEAKYKLC(1)K	IT(-172.38)PE(-158.95)E(-145.96)AK(-107.25)Y(-78.82)K(-58)LC(58)K(-174.24)	11	3	-0.29082			By MS/MS	By MS/MS	By MS/MS	By MS/MS
Q7Z3E1	360	Y	TIPARP	TCDD-inducible poly [ADP-ribose] polymerase	0.998856	1.52e-10	172.21	157.69			515558000	376015000	120620000	341806000	5230;5232;5220;5219;5227;5225;5226			515558000	376015000	120620000	310560000						31246000	G5E9W1	_DHFGWREY(ad)PESVIR_	G5E9W1	TIPARP	Protein mono-ADP-ribosyltransferase TIPARP (Fragment) OS=Homo sapiens OX=9606 GN=TIPARP PE=1 SV=1;Protein mono-ADP-ribosyltransferase TIPARP OS=Homo sapiens OX=9606 GN=TIPARP PE=1 SV=1;Poly [ADP-ribose] polymerase (Fragment) OS=Homo sapiens OX=9606 GN=TIPA	32.445	155.08	1	TVWKFFCRDHFGWREYPESVIRLIEEANSRG	X;X;X;X;X;X;ADP-ribosylation (CDEHKRSTY);X;X;X;X;X;X;X;X;ADP-ribosylation (CDEHKRSTY);X;X;X;X;X;X;X;X;X;X;X;X;ADP-ribosylation (CDEHKRSTY);ADP-ribosylation (CDEHKRSTY);X	XXXXXXXXPPPPPPPPPPPPPPXXXXXXXXX	DHFGWRE(0.001)Y(0.999)PE(0.001)SVIR	D(-119.05)H(-112.14)FGWR(-52.56)E(-32.45)Y(32.45)PE(-32.45)S(-62.14)VIR(-155.08)	8	3	-0.0045499			By MS/MS	By MS/MS	By MS/MS	By MS/MS
Q99729	319	S	HNRNPAB	Heterogeneous nuclear ribonucleoprotein A/B	0.999759	2.75e-31	298.66	298.66	877863000	916660000	498741000	239894000	137509000	629290900	43074;13749;13752;13754;13750;13753;12991;13763;13762;13761;31582;13759;13751;12986;13760	682790000	916660000	492616000	206080000	137509000	602730000	195073000		6125000	33814000		26560900	Q99729-3	_GNRGSGGGGGGGGQGSTNYGKS(ad)QR_;_GNRGSGGGGGGGGQGSTNYGKS(ad)QRR_;_GSGGGGGGGGQGSTNYGKS(ad)QR_;_GSGGGGGGGGQGSTNYGKS(ad)QRR_;_NRGNRGSGGGGGGGGQGSTNYGKS(ad)QR_;_S(ad)QRRGGHQNNYKPY_	Q99729-3	HNRNPAB	Isoform 3 of Heterogeneous nuclear ribonucleoprotein A/B OS=Homo sapiens OX=9606 GN=HNRNPAB;Isoform 4 of Heterogeneous nuclear ribonucleoprotein A/B OS=Homo sapiens OX=9606 GN=HNRNPAB;Heterogeneous nuclear ribonucleoprotein A/B OS=Homo sapiens OX=9606 GN=H	36.1849	214	1	GGGGGGGQGSTNYGKSQRRGGHQNNYKPY__	X;X;X;X;X;X;X;X;X;X;X;X;X;X;X;ADP-ribosylation (CDEHKRSTY);X;X;X;X;X;X;X;X;X;X;X;X;X;X;X	PPPPPPPPPPPPPPPPPPPPPPPPPPPPPXX	S(1)QRRGGHQNNYKPY	S(36.18)QR(-36.18)R(-79.38)GGH(-151.64)QNNY(-204.25)K(-212.04)PY(-214)	1	4	0.19674	By MS/MS	By MS/MS	By MS/MS	By MS/MS	By MS/MS	By MS/MS
Q7Z3E1	74	R	TIPARP	TCDD-inducible poly [ADP-ribose] polymerase	0.998842	1.56e-10	180.05	165.71	41148000	2357600	488710000	487676000		555965000	42464;42461;42460;42462;42458;42463;42457;42459			258320000	276450000		527769000	41148000	2357600	230390000	211226000		28196000	G5E9W1	_SLRPILNTLLESGSLDGVFR(ad)SR_	G5E9W1	TIPARP	Protein mono-ADP-ribosyltransferase TIPARP (Fragment) OS=Homo sapiens OX=9606 GN=TIPARP PE=1 SV=1;Protein mono-ADP-ribosyltransferase TIPARP OS=Homo sapiens OX=9606 GN=TIPARP PE=1 SV=1;Protein mono-ADP-ribosyltransferase TIPARP (Fragment) OS=Homo sapiens O	29.3597	180.05	1	ILNTLLESGSLDGVFRSRNQSTDENSLHEPM	X;X;X;X;X;X;X;X;X;X;X;X;X;X;X;ADP-ribosylation (CDEHKRSTY);ADP-ribosylation (CDEHKRSTY);X;X;X;ADP-ribosylation (CDEHKRSTY);ADP-ribosylation (CDEHKRSTY);X;X;X;X;X;ADP-ribosylation (CDEHKRSTY);X;X;X	PPPPPPPPPPPPPPPPPPXXXXXXXXXXXXX	SLRPILNTLLESGSLDGVFR(0.999)S(0.001)R	S(-173.93)LR(-171.13)PILNT(-155.22)LLE(-139.06)S(-126.6)GS(-105.69)LD(-74.09)GVFR(29.36)S(-29.36)R(-180.05)	20	3	-0.26047	By matching	By matching	By MS/MS	By MS/MS		By MS/MS
P22061	15	H	PCMT1	Protein-L-isoaspartate(D-aspartate) O-methyltransferase;Protein-L-isoaspartate O-methyltransferase	1	3.03e-14	192.18	180.54	38847500	15985400	482376000	470407600	136276000	728790000	40383;40386;40387;40388;40389;40391;40390;4469;4468	4872900	12099000	162450000	426030000	136276000	269820000	33974600	3886400	319926000	44377600		458970000	P22061	_(ac)AWKSGGASHSELIH(ad)NLRK_;_SGGASHSELIH(ad)NLR_;_SGGASHSELIH(ad)NLRK_	P22061	PCMT1	Protein-L-isoaspartate(D-aspartate) O-methyltransferase OS=Homo sapiens OX=9606 GN=PCMT1 PE=1 SV=4;Isoform 2 of Protein-L-isoaspartate(D-aspartate) O-methyltransferase OS=Homo sapiens OX=9606 GN=PCMT1;Protein-L-isoaspartate O-methyltransferase OS=Homo sapi	66.2036	192.18	1	_MAWKSGGASHSELIHNLRKNGIIKTDKVFE	X;X;X;X;X;X;X;X;X;X;X;X;X;X;X;ADP-ribosylation (CDEHKRSTY);X;X;X;X;X;X;X;X;X;X;X;X;X;X;X	XXPPPPPPPPPPPPPPPPPPXXXXXXXXXXX	SGGASHSELIH(1)NLRK	S(-175.56)GGAS(-145.29)H(-130.12)S(-104.66)E(-76.27)LIH(66.2)NLR(-66.2)K(-192.18)	11	4	0.27518	By MS/MS	By MS/MS	By MS/MS	By MS/MS	By MS/MS	By MS/MS
Q08945	335	H	SSRP1	FACT complex subunit SSRP1	0.996921	1.21e-28	242.45	233.46	1028260000	618023000	471140000	541191000	428409000	628640000	19147;19148;21098;21100;19149;21095;21096;19156;19145;19144;21099;21097;21101;19146;21094;19150	1028260000	618023000	364910000	541191000	428409000	628640000			106230000				Q08945	_ITVPGNFQGH(ad)SGAQC(ca)ITC(ca)SYK_;_ITVPGNFQGH(ad)SGAQC(ca)ITC(ca)SYKASSGLLYPLER_;_KITVPGNFQGH(ad)SGAQC(ca)ITC(ca)SYK_	Q08945	SSRP1	FACT complex subunit SSRP1 OS=Homo sapiens OX=9606 GN=SSRP1 PE=1 SV=1	25.1022	119.38	1	ALVNRKITVPGNFQGHSGAQCITCSYKASSG	X;X;X;X;X;X;X;X;X;X;X;X;X;X;X;ADP-ribosylation (CDEHKRSTY);X;X;X;X;Carbamidomethyl (C);X;X;Carbamidomethyl (C);X;X;X;X;X;X;X	XXXXXPPPPPPPPPPPPPPPPPPPPPPPPPP	ITVPGNFQGH(0.997)S(0.003)GAQCITCSYK	IT(-75.07)VPGNFQGH(25.1)S(-25.1)GAQC(-119.38)IT(-76.27)C(-119.38)S(-86.55)Y(-91.26)K(-119.38)	10	3	-0.40561	By MS/MS	By MS/MS	By MS/MS	By MS/MS	By MS/MS	By MS/MS
P06748	139	S	NPM1	Nucleophosmin	0.999996	0.000410084	117.76	77.521	1093000000	669612000	462880000	241230000	391310000	643610000	26110;26112;26114;26116;26118;26120;26121	1093000000	669612000	462880000	241230000	391310000	643610000							P06748;P06748-2	_LLSIS(ad)GKR_	P06748	NPM1	Nucleophosmin OS=Homo sapiens OX=9606 GN=NPM1 PE=1 SV=2;Isoform 3 of Nucleophosmin OS=Homo sapiens OX=9606 GN=NPM1;Nucleophosmin (Fragment) OS=Homo sapiens OX=9606 GN=NPM1 PE=1 SV=1;Isoform 2 of Nucleophosmin OS=Homo sapiens OX=9606 GN=NPM1	56.6707	117.76	1	ESEDEEEEDVKLLSISGKRSAPGGGSKVPQK	X;X;X;X;X;X;X;X;X;X;X;X;X;X;X;ADP-ribosylation (CDEHKRSTY);X;X;ADP-ribosylation (CDEHKRSTY);ADP-ribosylation (CDEHKRSTY);X;X;X;X;X;ADP-ribosylation (CDEHKRSTY);X;X;X;X;X	XXXXXXXXXXXPPPPPPPPXXXXXXXXXXXX	LLSIS(1)GKR	LLS(-56.67)IS(56.67)GK(-56.67)R(-117.76)	5	3	0.38336	By MS/MS	By MS/MS	By MS/MS	By MS/MS	By MS/MS	By MS/MS
Q9Y2Z0	62	C	SUGT1	Suppressor of G2 allele of SKP1 homolog	0.999799	1.87e-50	322.39	299.1			462440000	638590000	410753000	757150000	4510;4506;4508;4507;4509;4504;4502;4505			336360000	638590000	410753000	757150000			126080000				Q9Y2Z0-2	_AYC(ca)HILLGNYC(ad)VAVADAK_;_AYC(ca)HILLGNYC(ad)VAVADAKK_	Q9Y2Z0-2	SUGT1	Isoform 2 of Protein SGT1 homolog OS=Homo sapiens OX=9606 GN=SUGT1;Protein SGT1 homolog OS=Homo sapiens OX=9606 GN=SUGT1 PE=1 SV=3	36.9638	322.39	1	YYCQRAYCHILLGNYCVAVADAKKSLELNPN	X;X;X;X;X;X;X;Carbamidomethyl (C);X;X;X;X;X;X;X;ADP-ribosylation (CDEHKRSTY);X;X;X;X;X;X;X;X;X;X;X;X;X;X;X	XXXXXPPPPPPPPPPPPPPPPPPPXXXXXXX	AYCHILLGNYC(1)VAVADAKK	AY(-228.11)C(-203.91)H(-186)ILLGNY(-36.96)C(36.96)VAVAD(-137.37)AK(-176.71)K(-322.39)	11	4	-0.26718			By MS/MS	By MS/MS	By MS/MS	By MS/MS
P38159	94	R	RBMX	RNA-binding motif protein, X chromosome;RNA-binding motif protein, X chromosome, N-terminally processed	0.999294	2.08e-52	330.54	315.68			456350000	134707000	347968000	407760000	1711;1713;1714;1710;1712;49039			456350000	34577000	347968000	115680000				100130000		292080000	P38159	_AIKVEQATKPSFESGRR(ad)GPPPPPR_;_VEQATKPSFESGRR(ad)GPPPPPR_	P38159	RBMX	RNA-binding motif protein, X chromosome OS=Homo sapiens OX=9606 GN=RBMX PE=1 SV=3;Isoform 2 of RNA-binding motif protein, X chromosome OS=Homo sapiens OX=9606 GN=RBMX;RNA-binding motif protein, X chromosome OS=Homo sapiens OX=9606 GN=RBMX PE=1 SV=1;RNA-bin	31.5112	266.78	1	IKVEQATKPSFESGRRGPPPPPRSRGPPRGL	X;X;X;X;X;X;X;X;X;X;X;X;X;X;X;ADP-ribosylation (CDEHKRSTY);X;X;X;X;X;X;X;X;X;X;X;X;X;X;X	PPPPPPPPPPPPPPPPPPPPPPPXXXXXXXX	AIKVEQATKPSFESGR(0.001)R(0.999)GPPPPPR	AIK(-247.96)VE(-229.15)QAT(-180.59)K(-180.59)PS(-150.43)FE(-117.07)S(-80.76)GR(-31.51)R(31.51)GPPPPPR(-266.78)	17	5	0.32083			By MS/MS	By MS/MS	By MS/MS	By MS/MS
P39748	363	S	FEN1	Flap endonuclease 1	0.99989	3.03e-08	169.65	143.83	605381000	852900400	436237000	442122000	108706200	624120000	36034;36035;36040;36042;36045;36061;36059;36062;36064;36039;36033;36057;36041;36058;36060;36070;36068;20282;36038;36063;36043;36046;36065;36069;36036;36044;20286;36056;20283;20287;20285;20284;36066;36067;36037	605381000	850417000	326610000	150219000	56300200	354015000		2483400	109627000	291903000	52406000	270105000	P39748	_KEPEPKGS(ad)TK_;_RKEPEPKGS(ad)TK_;_RKEPEPKGS(ad)TKK_;_RKEPEPKGS(ad)TKKK_	P39748	FEN1	Flap endonuclease 1 OS=Homo sapiens OX=9606 GN=FEN1 PE=1 SV=1;Isoform FENMIT of Flap endonuclease 1 OS=Homo sapiens OX=9606 GN=FEN1	39.5805	133.42	1	GSLSSAKRKEPEPKGSTKKKAKTGAAGKFKR	X;X;X;ADP-ribosylation (CDEHKRSTY);X;X;X;X;X;X;X;X;X;X;X;ADP-ribosylation (CDEHKRSTY);X;X;X;X;X;X;X;X;X;X;X;X;X;X;X	XXXXXXXPPPPPPPPPPPPPXXXXXXXXXXX	RKEPEPKGS(1)TK	R(-124.85)K(-119.19)E(-108.46)PE(-94.75)PK(-64.9)GS(39.58)T(-39.58)K(-133.42)	9	3	0.079125	By MS/MS	By MS/MS	By MS/MS	By MS/MS	By MS/MS	By MS/MS
Q6NXT1	230	C	ANKRD54	Ankyrin repeat domain-containing protein 54	0.999746	4.05e-52	320.92	310.3	215081000	210621200	411899000	428404000	362113000	627764000	42019;42021;42024;42013;26318;42011;26317;42022;42017;42015;42018;42014;26319;42020;42012;42025;26320;42023;26314;42016;26316;26313	215081000	64365200	174069000	428404000	180493000	627764000		146256000	237830000		181620000		D3YTC9	_LNILQEGHAQC(ad)LEAVR_;_LNILQEGHAQC(ad)LEAVRLEVK_;_SKLNILQEGHAQC(ad)LEAVR_;_SKLNILQEGHAQC(ad)LEAVRLEVK_	D3YTC9	ANKRD54	Ankyrin repeat domain-containing protein 54 OS=Homo sapiens OX=9606 GN=ANKRD54 PE=1 SV=1;Ankyrin repeat domain-containing protein 54 OS=Homo sapiens OX=9606 GN=ANKRD54 PE=1 SV=2;Ankyrin repeat domain-containing protein 54 (Fragment) OS=Homo sapiens OX=9606	35.9508	314.29	1	LAKSKLNILQEGHAQCLEAVRLEVKQIIHML	X;X;X;X;X;X;X;X;X;X;X;X;X;X;X;ADP-ribosylation (CDEHKRSTY);X;X;X;X;X;X;X;X;X;X;X;X;X;X;X	XXXPPPPPPPPPPPPPPPPPPPPPPXXXXXX	SKLNILQEGHAQC(1)LEAVRLEVK	S(-232.41)K(-221.04)LNILQE(-113.69)GH(-70.34)AQC(35.95)LE(-35.95)AVR(-92.38)LE(-144.23)VK(-314.29)	13	4	-0.18103	By MS/MS	By MS/MS	By MS/MS	By MS/MS	By MS/MS	By MS/MS
P27694	177	S	RPA1	Replication protein A 70 kDa DNA-binding subunit;Replication protein A 70 kDa DNA-binding subunit, N-terminally processed	0.999446	8.5e-22	236.42	221.54	739040000	510750000	384190000	294770000	112550000	394460000	198;202;200;207;195;205	739040000	510750000	384190000	294770000	112550000	394460000							P27694	_AAGPSLSHTS(ad)GGTQSK_	P27694	RPA1	Replication protein A 70 kDa DNA-binding subunit OS=Homo sapiens OX=9606 GN=RPA1 PE=1 SV=2	32.5667	236.42	1	SKTFGKAAGPSLSHTSGGTQSKVVPIASLTP	ADP-ribosylation (CDEHKRSTY);X;X;X;X;X;X;X;X;X;X;X;X;X;X;ADP-ribosylation (CDEHKRSTY);X;X;X;X;X;X;X;X;X;X;X;X;X;X;X	XXXXXXPPPPPPPPPPPPPPPPXXXXXXXXX	AAGPSLSHT(0.001)S(0.999)GGTQSK	AAGPS(-134.26)LS(-91.54)H(-63.08)T(-32.57)S(32.57)GGT(-100.56)QS(-135.99)K(-236.42)	10	3	-0.32802	By MS/MS	By MS/MS	By MS/MS	By MS/MS	By MS/MS	By MS/MS
Q08945	531	S	SSRP1	FACT complex subunit SSRP1	0.999974	9.39e-14	158.79	108.44	217485900	432959000	368575000	204564000	171922000	1151240000	43420;43421;43423;43417;43430;5835;43416;43433;28338;43418;43419;43427;43422;5833;5834;43428;43424;43429;43435;43432;2048;2047;43434	123704000	432959000	368575000	166334000	171922000	716330000	93781900			38230000		434910000	Q08945	_AKMAKDRKS(ad)R_;_DRKS(ad)RKKPVEVK_;_DRKS(ad)RKKPVEVKK_;_MAKDRKS(ad)R_;_S(ad)RKKPVEVK_;_S(ad)RKKPVEVKK_	Q08945	SSRP1	FACT complex subunit SSRP1 OS=Homo sapiens OX=9606 GN=SSRP1 PE=1 SV=1;FACT complex subunit SSRP1 (Fragment) OS=Homo sapiens OX=9606 GN=SSRP1 PE=1 SV=1	45.8434	150.27	1	KRKQLKKAKMAKDRKSRKKPVEVKKGKDPNA	X;X;X;X;X;X;X;X;X;X;X;X;X;X;X;ADP-ribosylation (CDEHKRSTY);X;X;X;X;X;X;X;X;X;X;X;X;X;X;X	XXXXXXXPPPPPPPPPPPPPPPPPPXXXXXX	S(1)RKKPVEVK	S(45.84)R(-45.84)K(-65.45)K(-91.64)PVE(-135.17)VK(-150.27)	1	4	0.22537	By MS/MS	By MS/MS	By MS/MS	By MS/MS	By MS/MS	By MS/MS
P62280	116	C	RPS11	40S ribosomal protein S11	0.99966	6.81e-19	198.56	194.4			365890000	330449000	65639000	352510000	31266;31273;31267;31272;31265;31264			365890000	50199000	65639000	121120000				280250000		231390000	P62280	_NM(ox)SVHLSPC(ad)FR_;_NMSVHLSPC(ad)FR_;_NMSVHLSPC(ad)FRDVQIGDIVTVGEC(ca)RPLSK_	P62280	RPS11	40S ribosomal protein S11 OS=Homo sapiens OX=9606 GN=RPS11 PE=1 SV=3;40S ribosomal protein S11 OS=Homo sapiens OX=9606 GN=RPS11 PE=1 SV=1;40S ribosomal protein S11 OS=Homo sapiens OX=9606 GN=RPS11 PE=1 SV=1	34.6842	147.91	1	RFEKRHKNMSVHLSPCFRDVQIGDIVTVGEC	X;X;X;X;X;X;X;X;Oxidation (M);X;X;X;X;X;X;ADP-ribosylation (CDEHKRSTY);X;X;X;X;X;X;X;X;X;X;X;X;X;X;Carbamidomethyl (C);ADP-ribosylation (CDEHKRSTY)	XXXXXXXPPPPPPPPPPPPPPPPPPPPPPPP	NMSVHLSPC(1)FR	NMS(-114.59)VH(-80.03)LS(-34.68)PC(34.68)FR(-147.91)	9	3	-0.20479			By MS/MS	By MS/MS	By MS/MS	By MS/MS
Q96RN5	660	C	MED15	Mediator of RNA polymerase II transcription subunit 15	0.983231	5.05e-07	132.14	124.71			357937000	463511000	243162000	293180000	45785;45779;45780;45786;45784;45782;45781			357937000	392308000	243162000	293180000				71203000			G3V1P5	_TFVPAM(ox)TAIHGPPITAPVVC(ad)TR_;_TFVPAMTAIHGPPITAPVVC(ad)TR_	G3V1P5	MED15	Mediator of RNA polymerase II transcription subunit 15 OS=Homo sapiens OX=9606 GN=MED15 PE=1 SV=1;Isoform 3 of Mediator of RNA polymerase II transcription subunit 15 OS=Homo sapiens OX=9606 GN=MED15;Isoform 2 of Mediator of RNA polymerase II transcription	17.6816	132.14	1	AMTAIHGPPITAPVVCTRKRRLEDDERQSIP	X;Oxidation (M);X;X;X;X;X;X;X;X;X;X;X;X;X;ADP-ribosylation (CDEHKRSTY);X;X;X;X;X;X;X;X;X;X;X;X;X;X;X	PPPPPPPPPPPPPPPPPPXXXXXXXXXXXXX	TFVPAMTAIHGPPITAPVVC(0.983)T(0.017)R	T(-126.02)FVPAMT(-102.29)AIH(-78.7)GPPIT(-65.03)APVVC(17.68)T(-17.68)R(-132.14)	20	3	0.15608			By MS/MS	By MS/MS	By MS/MS	By MS/MS
P35251	302	S	RFC1	Replication factor C subunit 1	0.993919	1.87e-52	323.14	314.96	418998000	293275000	355963000	290187960	149194000	600106800	7838;7833;52549;43757;43752;7836;7839;43753;43756;43751;52554;52556;43755;43754;52555;7832;7837;52557;7835;52553;7840;52551;7834;33810;52548	418998000	293275000	189977000	289674000	105888000	598835000			165986000	513960	43306000	1271800	P35251-2	_ESQQHSKS(ad)SADKIGEVSSPK_;_QSKYESSKESQQHSKS(ad)SADKIGEVSSPK_;_S(ad)SADKIGEVSSPK_;_YESSKESQQHSKS(ad)SADK_;_YESSKESQQHSKS(ad)SADKIGEVSSPK_	P35251-2	RFC1	Isoform 2 of Replication factor C subunit 1 OS=Homo sapiens OX=9606 GN=RFC1;Replication factor C subunit 1 OS=Homo sapiens OX=9606 GN=RFC1 PE=1 SV=4;Replication factor C subunit 1 OS=Homo sapiens OX=9606 GN=RFC1 PE=1 SV=1	22.4951	262.36	1	QSKYESSKESQQHSKSSADKIGEVSSPKASS	X;X;X;X;X;X;X;X;X;X;X;X;ADP-ribosylation (CDEHKRSTY);X;X;ADP-ribosylation (CDEHKRSTY);X;X;X;X;X;X;X;X;X;X;X;X;X;X;X	PPPPPPPPPPPPPPPPPPPPPPPPPPPPPPP	ESQQHSK(0.006)S(0.994)SADKIGEVSSPK	E(-128.43)S(-118.9)QQH(-75.42)S(-44.24)K(-22.5)S(22.5)S(-33.46)AD(-75.42)K(-95.22)IGE(-165.97)VS(-202.5)S(-215.2)PK(-262.36)	8	4	-0.13242	By MS/MS	By MS/MS	By MS/MS	By MS/MS	By MS/MS	By MS/MS
Q7Z3E1	267	H	TIPARP	TCDD-inducible poly [ADP-ribose] polymerase	0.999985	2.15e-12	202.3	189.78			343440000	361401000	61811000	596393000	15169;15175;15182;15168;15174;15178;15181;15188;15193;15199;15198			343440000	361401000	61811000	596393000							G5E9W1	_HHTVLPYH(ad)WQIK_;_HHTVLPYH(ad)WQIKR_	G5E9W1	TIPARP	Protein mono-ADP-ribosyltransferase TIPARP (Fragment) OS=Homo sapiens OX=9606 GN=TIPARP PE=1 SV=1;Protein mono-ADP-ribosyltransferase TIPARP OS=Homo sapiens OX=9606 GN=TIPARP PE=1 SV=1;Protein mono-ADP-ribosyltransferase TIPARP (Fragment) OS=Homo sapiens O	48.1151	201.46	1	IYGRDCLKHHTVLPYHWQIKRTTTQKWQSVF	X;X;X;X;X;X;X;X;X;X;X;X;X;X;X;ADP-ribosylation (CDEHKRSTY);X;X;X;X;ADP-ribosylation (CDEHKRSTY);ADP-ribosylation (CDEHKRSTY);X;X;X;ADP-ribosylation (CDEHKRSTY);X;X;X;X;X	XXXXXXXXPPPPPPPPPPPPPXXXXXXXXXX	HHTVLPYH(1)WQIK	H(-173.1)H(-159.14)T(-137.23)VLPY(-48.12)H(48.12)WQIK(-201.46)	8	4	-0.050095			By MS/MS	By MS/MS	By MS/MS	By MS/MS
P39748	94	S	FEN1	Flap endonuclease 1	0.999889	3.36e-53	334.18	326.01	493683000	61138000	335308000	361749000	212950000	483540000	40329;40330;29417;29416;29419;29412;29414;29425;29424	493683000	61138000	335308000	361749000	212950000	483540000							P39748	_M(ox)MENGIKPVYVFDGKPPQLKS(ad)GELAK_;_MMENGIKPVYVFDGKPPQLKS(ad)GELAK_;_S(ad)GELAKR_	P39748	FEN1	Flap endonuclease 1 OS=Homo sapiens OX=9606 GN=FEN1 PE=1 SV=1;Isoform FENMIT of Flap endonuclease 1 OS=Homo sapiens OX=9606 GN=FEN1;Flap endonuclease 1 (Fragment) OS=Homo sapiens OX=9606 GN=FEN1 PE=1 SV=1	39.5389	87.696	1	IKPVYVFDGKPPQLKSGELAKRSERRAEAEK	X;X;X;X;X;X;X;X;X;X;X;X;X;X;X;ADP-ribosylation (CDEHKRSTY);X;X;X;X;X;ADP-ribosylation (CDEHKRSTY);ADP-ribosylation (CDEHKRSTY);ADP-ribosylation (CDEHKRSTY);ADP-ribosylation (CDEHKRSTY);X;X;X;X;X;X	PPPPPPPPPPPPPPPPPPPPPPXXXXXXXXX	S(1)GELAKR	S(39.54)GE(-39.54)LAK(-83)R(-87.7)	1	3	-0.26534	By MS/MS	By MS/MS	By MS/MS	By MS/MS	By MS/MS	By MS/MS
Q7Z3E1	366	R	TIPARP	TCDD-inducible poly [ADP-ribose] polymerase	0.999744	3.34e-10	171.79	167.26			334112000	246294000	11910000	219669000	8132;8130;8131;5244;8133;5242;5240;5241;5243			334112000	82804000	11910000	219669000				163490000			G5E9W1	_DHFGWREYPESVIR(ad)LIEEANSR_;_EYPESVIR(ad)LIEEANSR_	G5E9W1	TIPARP	Protein mono-ADP-ribosyltransferase TIPARP (Fragment) OS=Homo sapiens OX=9606 GN=TIPARP PE=1 SV=1;Protein mono-ADP-ribosyltransferase TIPARP OS=Homo sapiens OX=9606 GN=TIPARP PE=1 SV=1;Poly [ADP-ribose] polymerase (Fragment) OS=Homo sapiens OX=9606 GN=TIPA	36.6058	129.38	1	CRDHFGWREYPESVIRLIEEANSRGLKEVRF	ADP-ribosylation (CDEHKRSTY);X;X;X;X;X;X;X;X;X;X;X;X;X;X;ADP-ribosylation (CDEHKRSTY);X;X;X;X;X;X;ADP-ribosylation (CDEHKRSTY);ADP-ribosylation (CDEHKRSTY);X;X;X;ADP-ribosylation (CDEHKRSTY);X;ADP-ribosylation (CDEHKRSTY);X	XXPPPPPPPPPPPPPPPPPPPPPPXXXXXXX	EYPESVIR(1)LIEEANSR	E(-85.58)Y(-78.55)PE(-60.8)S(-36.61)VIR(36.61)LIE(-44.97)E(-53.04)ANS(-82.16)R(-129.38)	8	3	-0.23015			By MS/MS	By MS/MS	By MS/MS	By MS/MS
P05204	29	S	HMGN2	Non-histone chromosomal protein HMG-17	0.999999	1.75e-10	180.56	175.71	478892000	152111000	332183000	277990000	99644000	526229000	27099;27100;39519;39522;39524;39527;39525;39526;39523;27098;39521;39518;39520	478892000	152111000	189350000		72915000	290452000			142833000	277990000	26729000	235777000	P05204	_LS(ad)AKPAPPKPEPKPK_;_SARLS(ad)AKPAPPKPEPK_;_SARLS(ad)AKPAPPKPEPKPK_	P05204	HMGN2	Non-histone chromosomal protein HMG-17 OS=Homo sapiens OX=9606 GN=HMGN2 PE=1 SV=3	61.5204	180.56	1	KAKVKDEPQRRSARLSAKPAPPKPEPKPKKA	X;X;X;X;X;X;X;X;X;ADP-ribosylation (CDEHKRSTY);ADP-ribosylation (CDEHKRSTY);X;X;X;X;ADP-ribosylation (CDEHKRSTY);X;X;X;X;X;X;X;X;X;X;X;X;X;X;X	XXXXXXXXXXXPPPPPPPPPPPPPPPPPPXX	SARLS(1)AKPAPPKPEPKPK	S(-81.99)AR(-61.52)LS(61.52)AK(-69.46)PAPPK(-127.83)PE(-144.52)PK(-158.43)PK(-180.56)	5	4	-0.047402	By MS/MS	By MS/MS	By MS/MS	By matching	By MS/MS	By MS/MS
P62805	2	S	HIST1H4A	Histone H4	1	5.15e-22	234.9	198.87	8177702810	12271878000	328943090	3267723300	458506600	998639860	40842;40844;40846;40847;40848;40849;40850;40851;40852;40853;40864;40865;40866;40877;40845;40860;40861;40843;40899;40862;40863;40881;40867	8177570000	12246700000	325998000	3245380000	457465000	990921000	132810	25178000	2945090	22343300	1041600	7718860	P62805	_(ac)S(ad)GRGKGGK_;_(ac)S(ad)GRGKGGKGLGK_;_(ac)S(ad)GRGKGGKGLGKGGAK_;_(ac)S(ad)GRGKGGKGLGKGGAKR_	P62805	HIST1H4A	Histone H4 OS=Homo sapiens OX=9606 GN=HIST1H4A PE=1 SV=2	67.6721	130.75	1;2	______________MSGRGKGGKGLGKGGAK	X;X;X;X;X;X;X;X;X;X;X;X;X;X;X;ADP-ribosylation (CDEHKRSTY);X;ADP-ribosylation (CDEHKRSTY);X;X;X;X;X;X;X;X;X;X;X;X;X	XXXXXXXXXXXXXXXPPPPPPPPPPPPPPPP	S(1)GRGKGGK	S(67.67)GR(-67.67)GK(-113.01)GGK(-130.75)	1	3	0.064898	By MS/MS	By MS/MS	By MS/MS	By MS/MS	By MS/MS	By MS/MS
Q7Z3E1	507	Y	TIPARP	TCDD-inducible poly [ADP-ribose] polymerase	0.999733	3.05e-17	228.12	218.74			328782000	1192330000	167465900	235455200	50728;50729;50730;50731;53338;50736;50750;50751;53325;50733;50739;50740;50749;50752;50761			286892000	1192330000	146521000	172962000			41890000		20944900	62493200	G5E9W1	_VQNQFLWEKY(ad)K_;_VQNQFLWEKY(ad)KR_;_VQNQFLWEKY(ad)KRK_;_VQNQFLWEKY(ad)KRKK_;_Y(ad)KRKKEYMNR_;_Y(ad)KRKKEYMNRK_	G5E9W1	TIPARP	Protein mono-ADP-ribosyltransferase TIPARP (Fragment) OS=Homo sapiens OX=9606 GN=TIPARP PE=1 SV=1;Protein mono-ADP-ribosyltransferase TIPARP OS=Homo sapiens OX=9606 GN=TIPARP PE=1 SV=1;Poly [ADP-ribose] polymerase (Fragment) OS=Homo sapiens OX=9606 GN=TIPA	35.7599	160.18	1	ILQILRVQNQFLWEKYKRKKEYMNRKMFGRD	X;X;X;X;X;ADP-ribosylation (CDEHKRSTY);X;X;X;X;X;X;X;X;X;ADP-ribosylation (CDEHKRSTY);X;X;X;X;X;ADP-ribosylation (CDEHKRSTY);Oxidation (M);X;ADP-ribosylation (CDEHKRSTY);ADP-ribosylation (CDEHKRSTY);Oxidation (M);X;X;ADP-ribosylation (CDEHKRSTY);X	XXXXXXPPPPPPPPPPPPPPPPPPPPXXXXX	VQNQFLWEKY(1)K	VQNQFLWE(-57.78)K(-35.76)Y(35.76)K(-160.18)	10	3	0.1901			By MS/MS	By MS/MS	By MS/MS	By MS/MS
Q00839	187	S	HNRNPU	Heterogeneous nuclear ribonucleoprotein U	0.998537	1.27e-32	267.47	251.24	3959100000	4212490000	322160000	1247650000	2044660000	777412000	6339;43811;43812;43815;43813;43814;43810;10283;10276;6335;10279;6341;6340;10281;6336;10280;6338;10282;10277;10275;10278	3959100000	4212490000	322160000	1247650000	1935190000	777412000					109470000		Q00839;Q00839-2	_EAAGKS(ad)SGPTSLFAVTVAPPGAR_;_GAAKEAAGKS(ad)SGPTSLFAVTVAPPGAR_;_S(ad)SGPTSLFAVTVAPPGAR_	Q00839	HNRNPU	Heterogeneous nuclear ribonucleoprotein U OS=Homo sapiens OX=9606 GN=HNRNPU PE=1 SV=6;Isoform 2 of Heterogeneous nuclear ribonucleoprotein U OS=Homo sapiens OX=9606 GN=HNRNPU;Heterogeneous nuclear ribonucleoprotein U OS=Homo sapiens OX=9606 GN=HNRNPU PE=1	31.3532	224.89	1	QPQQQRGAAKEAAGKSSGPTSLFAVTVAPPG	X;X;X;X;X;X;X;X;X;X;X;X;X;X;X;ADP-ribosylation (CDEHKRSTY);X;X;X;X;X;X;X;X;X;X;X;X;X;X;X	XXXXXXPPPPPPPPPPPPPPPPPPPPPPPPP	EAAGK(0.001)S(0.999)S(0.001)GPTSLFAVTVAPPGAR	E(-86.62)AAGK(-31.35)S(31.35)S(-31.35)GPT(-61.04)S(-70.56)LFAVT(-167.65)VAPPGAR(-224.89)	6	4	0.29563	By MS/MS	By MS/MS	By MS/MS	By MS/MS	By MS/MS	By MS/MS
Q7Z3E1	401	R	TIPARP	TCDD-inducible poly [ADP-ribose] polymerase	0.999844	1.18e-05	125.71	98.615			318169400	317934100	65192700	194431400	7001;7007;7002;7004;7006;7008;7003;34712;34714;7005;34713;34717;34716			316188000	313923000	65192700	182611000			1981400	4011100		11820400	G5E9W1	_EIKR(ad)RPLFR_;_REIKR(ad)RPLFR_	G5E9W1	TIPARP	Protein mono-ADP-ribosyltransferase TIPARP (Fragment) OS=Homo sapiens OX=9606 GN=TIPARP PE=1 SV=1;Protein mono-ADP-ribosyltransferase TIPARP OS=Homo sapiens OX=9606 GN=TIPARP PE=1 SV=1;Poly [ADP-ribose] polymerase (Fragment) OS=Homo sapiens OX=9606 GN=TIPA	41.0818	114.97	1	NHYILHNSFFRREIKRRPLFRSCFILLPYLQ	X;ADP-ribosylation (CDEHKRSTY);ADP-ribosylation (CDEHKRSTY);X;X;ADP-ribosylation (CDEHKRSTY);X;X;X;X;ADP-ribosylation (CDEHKRSTY);X;X;X;X;ADP-ribosylation (CDEHKRSTY);X;X;X;X;X;X;X;X;X;X;X;X;X;X;X	XXXXXXXXXXXPPPPPPPPPPXXXXXXXXXX	EIKR(1)RPLFR	E(-67.12)IK(-41.08)R(41.08)R(-41.08)PLFR(-114.97)	4	4	-0.65645			By MS/MS	By MS/MS	By MS/MS	By MS/MS
O15347	162	S	HMGB3	High mobility group protein B3	0.999809	1.48e-65	345.74	328.87	840654000	234003000	314384700	459006000	24864800	472218000	6052;6053;6055;6056;6060;6070;6073;41666;41671;41673;41675;6054;6059;6075;6062;6084;41672;41652;6072;6076;6061;41653;6074;41654;6069;6068;6085;41667;41668;41670;6058;6057	726652000	234003000	95106700	272829000	24864800	204199000	114002000		219278000	186177000		268019000	E7ES08	_DVADYKS(ad)K_;_DVADYKS(ad)KGKFDGAK_;_DVADYKS(ad)KGKFDGAKGPAK_;_DVADYKS(ad)KGKFDGAKGPAKVAR_;_S(ad)KGKFDGAK_;_S(ad)KGKFDGAKGPAK_	E7ES08	HMGB3	High mobility group protein B3 (Fragment) OS=Homo sapiens OX=9606 GN=HMGB3 PE=1 SV=1;High mobility group protein B3 (Fragment) OS=Homo sapiens OX=9606 GN=HMGB3 PE=1 SV=1;High mobility group protein B3 OS=Homo sapiens OX=9606 GN=HMGB3 PE=1 SV=4	37.1834	240.8	1	AKLKEKYEKDVADYKSKGKFDGAKGPAKVAR	X;X;X;X;X;X;X;X;X;X;X;X;X;X;X;ADP-ribosylation (CDEHKRSTY);X;X;X;X;X;X;X;X;X;X;X;X;X;X;X	XXXXXXXXXPPPPPPPPPPPPPPPPPPPPPP	S(1)KGKFDGAKGPAK	S(37.18)K(-37.18)GK(-123.77)FD(-168.11)GAK(-225.02)GPAK(-240.8)	1	4	0.021587	By MS/MS	By MS/MS	By MS/MS	By MS/MS	By MS/MS	By MS/MS
Q7Z3E1	343	Y	TIPARP	TCDD-inducible poly [ADP-ribose] polymerase	0.970421	7.83e-05	102.89	97.548			310310000	92809000	192314000	84090000	36963;36961;36958;36962;27333;27336			310310000	92809000	174003000	84090000					18311000		G5E9W1	_LSTPPSSNVNSIY(ad)HTVWK_;_RLSTPPSSNVNSIY(ad)HTVWK_	G5E9W1	TIPARP	Protein mono-ADP-ribosyltransferase TIPARP (Fragment) OS=Homo sapiens OX=9606 GN=TIPARP PE=1 SV=1;Protein mono-ADP-ribosyltransferase TIPARP OS=Homo sapiens OX=9606 GN=TIPARP PE=1 SV=1;Poly [ADP-ribose] polymerase (Fragment) OS=Homo sapiens OX=9606 GN=TIPA	16.4103	94.281	1	LRRLSTPPSSNVNSIYHTVWKFFCRDHFGWR	X;X;X;X;X;X;X;X;X;X;X;X;X;X;X;ADP-ribosylation (CDEHKRSTY);X;X;X;X;X;X;X;Carbamidomethyl (C);ADP-ribosylation (CDEHKRSTY);ADP-ribosylation (CDEHKRSTY);X;ADP-ribosylation (CDEHKRSTY);X;X;X;ADP-ribosylation (CDEHKRSTY)	XXPPPPPPPPPPPPPPPPPPPXXXXXXXXXX	RLSTPPSSNVNS(0.004)IY(0.97)H(0.022)T(0.004)VWK	R(-82.68)LS(-74.29)T(-69.38)PPS(-69.38)S(-64.04)NVNS(-24.19)IY(16.41)H(-16.41)T(-24.19)VWK(-94.28)	14	3	0.1158			By MS/MS	By MS/MS	By MS/MS	By MS/MS
Q7Z3E1	391	H	TIPARP	TCDD-inducible poly [ADP-ribose] polymerase	0.999582	6.57e-16	208.47	201.05			310133000	1696020000		444967000	9350;9349;9335				1696020000		29777000			310133000			415190000	G5E9W1	_FMMWNNHYILH(ad)NSFFR_;_FMMWNNHYILH(ad)NSFFRR_	G5E9W1	TIPARP	Protein mono-ADP-ribosyltransferase TIPARP (Fragment) OS=Homo sapiens OX=9606 GN=TIPARP PE=1 SV=1;Protein mono-ADP-ribosyltransferase TIPARP OS=Homo sapiens OX=9606 GN=TIPARP PE=1 SV=1;Poly [ADP-ribose] polymerase (Fragment) OS=Homo sapiens OX=9606 GN=TIPA	33.8487	208.47	1	LKEVRFMMWNNHYILHNSFFRREIKRRPLFR	X;X;X;X;X;X;X;X;X;X;X;X;X;X;X;ADP-ribosylation (CDEHKRSTY);X;X;X;X;X;ADP-ribosylation (CDEHKRSTY);X;X;X;ADP-ribosylation (CDEHKRSTY);X;X;X;X;X	XXXXXPPPPPPPPPPPPPPPPPXXXXXXXXX	FMMWNNHYILH(1)NSFFRR	FMMWNNH(-55.23)Y(-33.85)ILH(33.85)NS(-55.23)FFR(-111.17)R(-208.47)	11	4	-0.58972			By matching	By MS/MS		By matching
Q7Z3E1	516	R	TIPARP	TCDD-inducible poly [ADP-ribose] polymerase	1	0.000313235	128.12	95.391			309339000	157333000	35131500	149654500	20331;21234;21241;21246;21247;21251;21252;36200;36198			263743000	157333000	35131500	144720000			45596000			4934500	G5E9W1	_KEYMNR(ad)K_;_KKEYM(ox)NR(ad)K_;_KKEYMNR(ad)K_;_RKKEYMNR(ad)K_	G5E9W1	TIPARP	Protein mono-ADP-ribosyltransferase TIPARP (Fragment) OS=Homo sapiens OX=9606 GN=TIPARP PE=1 SV=1;Protein mono-ADP-ribosyltransferase TIPARP OS=Homo sapiens OX=9606 GN=TIPARP PE=1 SV=1;Poly [ADP-ribose] polymerase (Fragment) OS=Homo sapiens OX=9606 GN=TIPA	88.1842	128.12	1	QFLWEKYKRKKEYMNRKMFGRDRIINERHLF	X;X;X;X;ADP-ribosylation (CDEHKRSTY);ADP-ribosylation (CDEHKRSTY);ADP-ribosylation (CDEHKRSTY);X;X;X;X;X;X;Oxidation (M);X;ADP-ribosylation (CDEHKRSTY);ADP-ribosylation (CDEHKRSTY);Oxidation (M);X;X;ADP-ribosylation (CDEHKRSTY);X;ADP-ribosylation (CDEHKRSTY);X;X;X;X;ADP-ribosylation (CDEHKRSTY);ADP-ribosylation (CDEHKRSTY);X;X	XXXXXXXXPPPPPPPPPPPPPPPXXXXXXXX	KKEYMNR(1)K	K(-125.82)K(-117.89)E(-107.99)Y(-88.18)MNR(88.18)K(-128.12)	7	3	-0.10527			By MS/MS	By MS/MS	By MS/MS	By MS/MS
Q7Z3E1	482	H	TIPARP	TCDD-inducible poly [ADP-ribose] polymerase	1	1.75e-08	137.62	121.01			305046000	325552000	275757000	336123000	17653;17656;17658;17661;45094;45098;45101;17670;17669;17678			241530000	325552000	275757000	311471000			63516000			24652000	G5E9W1	_IIYNLFH(ad)K_;_IIYNLFH(ad)KTVPEFK_;_IIYNLFH(ad)KTVPEFKYR_;_SYRIIYNLFH(ad)K_	G5E9W1	TIPARP	Protein mono-ADP-ribosyltransferase TIPARP (Fragment) OS=Homo sapiens OX=9606 GN=TIPARP PE=1 SV=1;Protein mono-ADP-ribosyltransferase TIPARP OS=Homo sapiens OX=9606 GN=TIPARP PE=1 SV=1;Poly [ADP-ribose] polymerase (Fragment) OS=Homo sapiens OX=9606 GN=TIPA	89.5163	106.68	1	VSAEDKSYRIIYNLFHKTVPEFKYRILQILR	X;X;X;X;X;X;X;X;X;X;X;X;X;X;X;ADP-ribosylation (CDEHKRSTY);X;X;X;X;X;X;X;ADP-ribosylation (CDEHKRSTY);ADP-ribosylation (CDEHKRSTY);X;X;X;X;X;ADP-ribosylation (CDEHKRSTY)	XXXXXXPPPPPPPPPPPPPPPPPPPXXXXXX	IIYNLFH(1)K	IIY(-89.52)NLFH(89.52)K(-106.68)	7	3	-0.10074			By MS/MS	By MS/MS	By MS/MS	By MS/MS
Q9H4L7	391	H	SMARCAD1	SWI/SNF-related matrix-associated actin-dependent regulator of chromatin subfamily A containing DEAD/H box 1	1	1.01e-10	173.56	158.7	443200000	217000000	304450000	244760000		464510000	18015;18016;18017;18018;18019;18020;18022;18021;18023	443200000	217000000	192100000	244760000		464510000			112350000				Q9H4L7	_ILH(ad)FLQDASIGELTLIPQC(ca)SQK_;_ILH(ad)FLQDASIGELTLIPQC(ca)SQKK_	Q9H4L7	SMARCAD1	SWI/SNF-related matrix-associated actin-dependent regulator of chromatin subfamily A containing DEAD/H box 1 OS=Homo sapiens OX=9606 GN=SMARCAD1 PE=1 SV=2;Isoform 2 of SWI/SNF-related matrix-associated actin-dependent regulator of chromatin subfamily A con	71.9557	173.56	1	SGEEVMEDGYKGKILHFLQDASIGELTLIPQ	X;X;X;X;X;X;X;X;X;X;X;X;X;X;X;ADP-ribosylation (CDEHKRSTY);X;X;X;X;X;X;X;X;X;X;X;X;X;X;X	XXXXXXXXXXXXXPPPPPPPPPPPPPPPPPP	ILH(1)FLQDASIGELTLIPQCSQKK	ILH(71.96)FLQD(-71.96)AS(-102.56)IGE(-128.93)LT(-134.78)LIPQC(-173.56)S(-168)QK(-172.7)K(-173.56)	3	4	1.2098	By MS/MS	By MS/MS	By MS/MS	By MS/MS		By MS/MS
P0CG47	54	R	UBB	Ubiquitin-40S ribosomal protein S27a;Ubiquitin;40S ribosomal protein S27a;Ubiquitin-60S ribosomal protein L40;Ubiquitin;60S ribosomal protein L40;Polyubiquitin-B;Ubiquitin;Polyubiquitin-C;Ubiquitin	0.999634	3.39e-15	216.34	198.18	4326500		299390000	50840000	339420000	505860000	33276;33282;33279;25169;33284;33281	4326500		299390000	50840000	339420000	505860000							P62979;P62987	_LIFAGKQLEDGR(ad)TLSDYNIQK_;_QLEDGR(ad)TLSDYNIQK_	P62979	RPS27A;UBA52;UBB;UBC	Ubiquitin-40S ribosomal protein S27a OS=Homo sapiens OX=9606 GN=RPS27A PE=1 SV=2;Uncharacterized protein OS=Homo sapiens OX=9606 PE=4 SV=1;Ubiquitin-60S ribosomal protein L40 OS=Homo sapiens OX=9606 GN=UBA52 PE=1 SV=2;Polyubiquitin-B (Fragment) OS=Homo sap	34.5869	216.34	1	DQQRLIFAGKQLEDGRTLSDYNIQKESTLHL	ADP-ribosylation (CDEHKRSTY);X;X;ADP-ribosylation (CDEHKRSTY);X;X;X;X;X;X;X;X;X;X;X;ADP-ribosylation (CDEHKRSTY);X;X;X;X;X;X;X;X;ADP-ribosylation (CDEHKRSTY);X;X;X;X;X;X	XXXXPPPPPPPPPPPPPPPPPPPPPXXXXXX	QLEDGR(1)TLSDYNIQK	QLE(-67.94)D(-47.3)GR(34.59)T(-34.59)LS(-90.37)D(-119.12)Y(-142.54)NIQK(-216.34)	6	3	-0.066272	By MS/MS		By MS/MS	By MS/MS	By MS/MS	By MS/MS
Q14978	303	S	NOLC1	Nucleolar and coiled-body phosphoprotein 1	1	5.16e-12	188.91	177.87	275491000	672011000	298590000	211081000	225501000	509480000	42264;42265;42266;42267;42269;42272;42274;42276;42268;42270;22928;42275;42273;42271;30970	275491000	672011000	298590000	211081000	225501000	509480000							A0A0A0MRM9	_KS(ad)LGTQPPKK_;_NKPGPYSSVPPPSAPPPKKS(ad)LGTQPPKK_;_S(ad)LGTQPPKK_;_S(ad)LGTQPPKKAVEK_	A0A0A0MRM9	NOLC1	Nucleolar and coiled-body phosphoprotein 1 (Fragment) OS=Homo sapiens OX=9606 GN=NOLC1 PE=1 SV=1;Nucleolar and coiled-body phosphoprotein 1 OS=Homo sapiens OX=9606 GN=NOLC1 PE=1 SV=2;Isoform 3 of Nucleolar and coiled-body phosphoprotein 1 OS=Homo sapiens O	79.9101	188.91	1	PYSSVPPPSAPPPKKSLGTQPPKKAVEKQQP	X;X;X;X;X;X;X;X;X;X;X;X;X;X;X;ADP-ribosylation (CDEHKRSTY);X;X;X;X;X;X;X;X;X;X;X;X;X;X;X	PPPPPPPPPPPPPPPPPPPPPPPPPPPPXXX	S(1)LGTQPPKKAVEK	S(79.91)LGT(-79.91)QPPK(-134.82)K(-156.76)AVE(-184.83)K(-188.91)	1	4	0.35066	By MS/MS	By MS/MS	By MS/MS	By MS/MS	By MS/MS	By MS/MS
P09651	337	S	HNRNPA1	Heterogeneous nuclear ribonucleoprotein A1;Heterogeneous nuclear ribonucleoprotein A1, N-terminally processed;Heterogeneous nuclear ribonucleoprotein A1-like 2	0.995235	2.66e-16	214.26	205.24	410610000		287490000		310574000	581000000	43831;11264;43839;43837;43835	410610000		287490000		310574000	581000000							P09651	_GGNFGGRS(ad)SGPYGGGGQYFAKPR_;_S(ad)SGPYGGGGQYFAKPR_	P09651	HNRNPA1;HNRNPA1L2	Heterogeneous nuclear ribonucleoprotein A1 OS=Homo sapiens OX=9606 GN=HNRNPA1 PE=1 SV=5;Heterogeneous nuclear ribonucleoprotein A1 OS=Homo sapiens OX=9606 GN=HNRNPA1 PE=1 SV=2;Isoform A1-A of Heterogeneous nuclear ribonucleoprotein A1 OS=Homo sapiens OX=96	23.2012	206.2	1	SSNFGPMKGGNFGGRSSGPYGGGGQYFAKPR	X;X;X;X;X;X;X;X;X;X;X;X;X;X;X;ADP-ribosylation (CDEHKRSTY);X;X;X;X;X;X;X;X;X;X;X;X;X;X;X	XXXXXXXXPPPPPPPPPPPPPPPPPPPPPPP	S(0.995)S(0.005)GPYGGGGQYFAKPR	S(23.2)S(-23.2)GPY(-56.15)GGGGQY(-169.04)FAK(-203.84)PR(-206.2)	1	3	0.38321	By MS/MS		By MS/MS	By MS/MS	By MS/MS	By MS/MS
Q9Y508	197	R	RNF114	E3 ubiquitin-protein ligase RNF114	1	1.92e-11	208.33	197.23	139039000	13998400	285980000	254900000	27282000	348810000	39261;39262;39263;39264;39265;39266;39267;39268	139039000	4265400	148650000	254900000	27282000	197210000		9733000	137330000			151600000	Q9Y508	_SANFREHIQR(ad)R_	Q9Y508	RNF114	E3 ubiquitin-protein ligase RNF114 OS=Homo sapiens OX=9606 GN=RNF114 PE=1 SV=1	100.034	195.51	1	GDPNYRSANFREHIQRRHRFSYDTFVDYDVD	X;X;X;X;X;X;X;X;X;X;X;X;X;X;X;ADP-ribosylation (CDEHKRSTY);X;X;X;X;X;X;X;X;X;X;X;X;X;X;X	XXXXXXPPPPPPPPPPPXXXXXXXXXXXXXX	SANFREHIQR(1)R	S(-194.6)ANFR(-156.84)E(-134.32)H(-100.03)IQR(100.03)R(-195.51)	10	4	0.20339	By MS/MS	By MS/MS	By MS/MS	By MS/MS	By MS/MS	By MS/MS
P06748	195	S	NPM1	Nucleophosmin	0.999987	5.17e-08	161.99	133.71	857232000	499236000	283551000	285046900	23774400	557833000	2941;2944;41460;41463;41465;41478;41479;41459;41461;41467;41468;41477;41464;41466;2942;41462;2939;2940;2943;2934;2937;41476;2951;2936;2935;22789;2938;22790;22788;2950	857232000	499236000	271607000	216881000	12968600	528787000			11944000	68165900	10805800	29046000	P06748	_APVKKS(ad)IR_;_APVKKS(ad)IRDTPAK_;_APVKKS(ad)IRDTPAKNAQK_;_KS(ad)IRDTPAK_;_S(ad)IRDTPAK_;_S(ad)IRDTPAKNAQK_	P06748	NPM1	Nucleophosmin OS=Homo sapiens OX=9606 GN=NPM1 PE=1 SV=2;Isoform 3 of Nucleophosmin OS=Homo sapiens OX=9606 GN=NPM1	48.7666	93.649	1	DFDDEEAEEKAPVKKSIRDTPAKNAQKSNQN	X;X;X;X;X;X;X;X;X;X;X;X;X;X;X;ADP-ribosylation (CDEHKRSTY);X;X;X;X;X;X;X;X;X;X;X;ADP-ribosylation (CDEHKRSTY);X;X;X	XXXXXXXXXXPPPPPPPPPPPPPPPPPXXXX	S(1)IRDTPAK	S(48.77)IR(-48.77)D(-67.53)T(-74.52)PAK(-93.65)	1	3	-0.212	By MS/MS	By MS/MS	By MS/MS	By MS/MS	By MS/MS	By MS/MS
Q7Z3E1	490	Y	TIPARP	TCDD-inducible poly [ADP-ribose] polymerase	0.999745	1.97e-10	166.6	166.6			282960000	520620000	568610000	390760000	53975;53978;53976;48135;48144;53974			282960000	520620000	568610000	390760000							G5E9W1	_TVPEFKY(ad)R_;_TVPEFKY(ad)RILQILR_;_Y(ad)RILQILR_	G5E9W1	TIPARP	Protein mono-ADP-ribosyltransferase TIPARP (Fragment) OS=Homo sapiens OX=9606 GN=TIPARP PE=1 SV=1;Protein mono-ADP-ribosyltransferase TIPARP OS=Homo sapiens OX=9606 GN=TIPARP PE=1 SV=1;Poly [ADP-ribose] polymerase (Fragment) OS=Homo sapiens OX=9606 GN=TIPA	35.9389	140.14	1	RIIYNLFHKTVPEFKYRILQILRVQNQFLWE	ADP-ribosylation (CDEHKRSTY);X;X;ADP-ribosylation (CDEHKRSTY);X;X;X;ADP-ribosylation (CDEHKRSTY);ADP-ribosylation (CDEHKRSTY);X;X;X;X;X;X;ADP-ribosylation (CDEHKRSTY);X;X;X;X;X;X;ADP-ribosylation (CDEHKRSTY);X;X;X;X;X;X;X;ADP-ribosylation (CDEHKRSTY)	XXXXXXXXXPPPPPPPPPPPPPPXXXXXXXX	Y(1)RILQILR	Y(35.94)R(-35.94)ILQILR(-140.14)	1	3	0.18669			By MS/MS	By MS/MS	By MS/MS	By MS/MS
Q7Z3E1	528	R	TIPARP	TCDD-inducible poly [ADP-ribose] polymerase	0.99607	1.16e-65	346.13	335.51			281526000	163870000	85932000	119307000	17537;17538;17544;17541;17545;17547;17546;17542;17539;17543;17536			176166000	144073000	85932000	35415000			105360000	19797000		83892000	G5E9W1	_IINER(ad)HLFHGTSQDVVDGIC(ca)K_	G5E9W1	TIPARP	Protein mono-ADP-ribosyltransferase TIPARP (Fragment) OS=Homo sapiens OX=9606 GN=TIPARP PE=1 SV=1;Protein mono-ADP-ribosyltransferase TIPARP OS=Homo sapiens OX=9606 GN=TIPARP PE=1 SV=1;Poly [ADP-ribose] polymerase (Fragment) OS=Homo sapiens OX=9606 GN=TIPA	24.5629	346.13	1	YMNRKMFGRDRIINERHLFHGTSQDVVDGIC	ADP-ribosylation (CDEHKRSTY);Oxidation (M);X;ADP-ribosylation (CDEHKRSTY);ADP-ribosylation (CDEHKRSTY);Oxidation (M);X;X;ADP-ribosylation (CDEHKRSTY);X;X;X;X;X;X;ADP-ribosylation (CDEHKRSTY);ADP-ribosylation (CDEHKRSTY);X;X;ADP-ribosylation (CDEHKRSTY);X;X;X;X;X;X;X;X;X;X;Carbamidomethyl (C);ADP-ribosylation (CDEHKRSTY)	XXXXXXXXXXXPPPPPPPPPPPPPPPPPPPP	IINER(0.996)H(0.003)LFHGTSQDVVDGICK	IINE(-33.48)R(24.56)H(-24.56)LFH(-138)GT(-189.41)S(-217.75)QD(-260.4)VVD(-302.79)GIC(-346.13)K(-346.13)	5	4	0.38665			By MS/MS	By MS/MS	By MS/MS	By MS/MS
P17844	354	C	DDX5	Probable ATP-dependent RNA helicase DDX5	0.996477	5.82e-16	211.13	211.13			273877000	226775500	24765200	421433000	4708;4709;4711;37685;37683;4710;37690;37687;37681;37682;37689;46605;37688;37652;34553;34555;34554;37680			158592000	171510000	18310500	373507000			115285000	55265500	6454700	47926000	P17844	_C(ad)DELTRK_;_RC(ad)DELTR_;_RRC(ad)DELTR_;_RRC(ad)DELTRK_;_TIVFVETKRRC(ad)DELTRK_	P17844	DDX5	Probable ATP-dependent RNA helicase DDX5 OS=Homo sapiens OX=9606 GN=DDX5 PE=1 SV=1;Isoform 2 of Probable ATP-dependent RNA helicase DDX5 OS=Homo sapiens OX=9606 GN=DDX5;Probable ATP-dependent RNA helicase DDX5 OS=Homo sapiens OX=9606 GN=DDX5 PE=1 SV=1;Prob	24.5176	116.37	1	EKENKTIVFVETKRRCDELTRKMRRDGWPAM	X;X;X;X;X;X;X;X;X;X;X;X;X;ADP-ribosylation (CDEHKRSTY);X;Carbamidomethyl (C);ADP-ribosylation (CDEHKRSTY);X;X;X;X;X;X;X;X;X;X;X;X;X;X;X	XXXXXPPPPPPPPPPPPPPPPPXXXXXXXXX	C(0.996)D(0.004)ELTRK	C(24.52)D(-24.52)E(-57.02)LT(-94.38)R(-111.67)K(-116.37)	1	3	0.088483			By MS/MS	By MS/MS	By MS/MS	By MS/MS
Q7Z3E1	595	R	TIPARP	TCDD-inducible poly [ADP-ribose] polymerase	0.997456	5.57e-33	282.21	271.11			269415000	199989000	135803000	317460000	50363;50373;50375;50380;50357;50358;50378;50382;50361			251686000	181159000	135803000	304001000			17729000	18830000		13459000	G5E9W1	_VLTGR(ad)YTM(ox)GSHGM(ox)R_;_VLTGR(ad)YTM(ox)GSHGMR_;_VLTGR(ad)YTMGSHGM(ox)R_;_VLTGR(ad)YTMGSHGMR_	G5E9W1	TIPARP	Protein mono-ADP-ribosyltransferase TIPARP (Fragment) OS=Homo sapiens OX=9606 GN=TIPARP PE=1 SV=1;Protein mono-ADP-ribosyltransferase TIPARP OS=Homo sapiens OX=9606 GN=TIPARP PE=1 SV=1;Poly [ADP-ribose] polymerase (Fragment) OS=Homo sapiens OX=9606 GN=TIPA	27.1376	137.09	1	SKGVHFMFLAKVLTGRYTMGSHGMRRPPPVN	X;ADP-ribosylation (CDEHKRSTY);X;X;ADP-ribosylation (CDEHKRSTY);X;Oxidation (M);X;X;X;X;X;X;X;X;ADP-ribosylation (CDEHKRSTY);ADP-ribosylation (CDEHKRSTY);X;Oxidation (M);X;X;ADP-ribosylation (CDEHKRSTY);X;Oxidation (M);X;X;X;X;X;X;X	XXXXXXXXXXXPPPPPPPPPPPPPPXXXXXX	VLT(0.001)GR(0.997)Y(0.002)TMGSHGMR	VLT(-32.4)GR(27.14)Y(-27.14)T(-43.86)MGS(-93.18)H(-109.35)GMR(-137.09)	5	3	-0.17154			By MS/MS	By MS/MS	By MS/MS	By MS/MS
Q7Z3E1	475	R	TIPARP	TCDD-inducible poly [ADP-ribose] polymerase	0.913498	5.73e-06	144.17	135.61			265160000			254300000	45102						254300000			265160000				G5E9W1	_SYR(ad)IIYNLFHK_	G5E9W1	TIPARP	Protein mono-ADP-ribosyltransferase TIPARP (Fragment) OS=Homo sapiens OX=9606 GN=TIPARP PE=1 SV=1;Protein mono-ADP-ribosyltransferase TIPARP OS=Homo sapiens OX=9606 GN=TIPARP PE=1 SV=1;Poly [ADP-ribose] polymerase (Fragment) OS=Homo sapiens OX=9606 GN=TIPA	10.7521	144.17	1	QDFIQVPVSAEDKSYRIIYNLFHKTVPEFKY	X;X;X;X;X;X;X;X;X;X;X;X;X;X;X;ADP-ribosylation (CDEHKRSTY);X;X;ADP-ribosylation (CDEHKRSTY);X;X;X;ADP-ribosylation (CDEHKRSTY);ADP-ribosylation (CDEHKRSTY);X;X;X;X;X;X;ADP-ribosylation (CDEHKRSTY)	XXXXXXXXXXXXXPPPPPPPPPPPXXXXXXX	S(0.01)Y(0.077)R(0.913)IIYNLFHK	S(-19.75)Y(-10.75)R(10.75)IIY(-81.08)NLFH(-136.71)K(-144.17)	3	3	0.25804			By matching			By MS/MS
O00193	63	S	SMAP	Small acidic protein	0.995276	2.54e-40	283.34	275.91	161524000	86606000	260770000	70313000	28374000	327180000	27687;27691;27688;27692;27694;27690;27693;6913;6914;27689	86627000	86606000	114140000	28356000	28374000	167040000	74897000		146630000	41957000		160140000	O00193	_EHTGRLVIGDHKS(ad)TSHFR_;_LVIGDHKS(ad)TSHFR_	O00193	SMAP;C11orf58	Small acidic protein OS=Homo sapiens OX=9606 GN=SMAP PE=1 SV=1;Chromosome 11 open reading frame 58 OS=Homo sapiens OX=9606 GN=C11orf58 PE=1 SV=2;Chromosome 11 open reading frame 58 (Fragment) OS=Homo sapiens OX=9606 GN=C11orf58 PE=1 SV=1	23.5459	225.55	1	GKKEHTGRLVIGDHKSTSHFRTGEEDKKINE	X;X;X;X;X;X;X;X;X;X;X;X;X;X;X;ADP-ribosylation (CDEHKRSTY);X;X;X;X;X;X;X;X;X;X;X;X;X;X;X	XXXPPPPPPPPPPPPPPPPPPPPPPPPXXXX	LVIGDHK(0.004)S(0.995)TSHFR	LVIGD(-77.42)H(-56.72)K(-23.55)S(23.55)T(-34.89)S(-67.21)H(-96.98)FR(-225.55)	8	3	-0.35786	By MS/MS	By MS/MS	By MS/MS	By MS/MS	By MS/MS	By MS/MS
Q7Z3E1	266	Y	TIPARP	TCDD-inducible poly [ADP-ribose] polymerase	0.999743	2.23e-17	232.17	219.73		1934900	260180000	361454000	149524000	213130000	15186;15197;15166;15195;15190;15171;15179;15176;15165;15170;15196;15177;15189;15194;15185			260180000	361454000	149524000	213130000		1934900					G5E9W1	_HHTVLPY(ad)HWQIK_;_HHTVLPY(ad)HWQIKR_	G5E9W1	TIPARP	Protein mono-ADP-ribosyltransferase TIPARP (Fragment) OS=Homo sapiens OX=9606 GN=TIPARP PE=1 SV=1;Protein mono-ADP-ribosyltransferase TIPARP OS=Homo sapiens OX=9606 GN=TIPARP PE=1 SV=1;Protein mono-ADP-ribosyltransferase TIPARP (Fragment) OS=Homo sapiens O	35.9002	232.17	1	CIYGRDCLKHHTVLPYHWQIKRTTTQKWQSV	X;X;X;X;X;X;X;X;X;X;X;X;X;X;X;ADP-ribosylation (CDEHKRSTY);X;X;X;X;X;ADP-ribosylation (CDEHKRSTY);ADP-ribosylation (CDEHKRSTY);X;X;X;ADP-ribosylation (CDEHKRSTY);X;X;X;X	XXXXXXXXXPPPPPPPPPPPPPXXXXXXXXX	HHTVLPY(1)HWQIKR	H(-156.58)H(-147.87)T(-119.73)VLPY(35.9)H(-35.9)WQIK(-153.64)R(-232.17)	7	4	0.47931		By matching	By MS/MS	By MS/MS	By MS/MS	By MS/MS
P62937	52	C	PPIA	Peptidyl-prolyl cis-trans isomerase A;Peptidyl-prolyl cis-trans isomerase A, N-terminally processed;Peptidyl-prolyl cis-trans isomerase	0.999704	2.55e-50	320.99	311.04	4936200	2334100	259760000	506100000		295750000	10937;10938;2527;10939;10936;10940	4936200	2334100	259760000	506100000		295750000							P62937	_ALSTGEKGFGYKGSC(ad)FHR_;_GFGYKGSC(ad)FHR_	P62937	PPIA	Peptidyl-prolyl cis-trans isomerase A OS=Homo sapiens OX=9606 GN=PPIA PE=1 SV=2;Peptidyl-prolyl cis-trans isomerase OS=Homo sapiens OX=9606 GN=PPIA PE=1 SV=1;Peptidyl-prolyl cis-trans isomerase OS=Homo sapiens OX=9606 GN=PPIA PE=1 SV=1	35.3079	190.57	1	RALSTGEKGFGYKGSCFHRIIPGFMCQGGDF	ADP-ribosylation (CDEHKRSTY);X;X;X;X;X;X;X;X;X;X;X;X;X;X;ADP-ribosylation (CDEHKRSTY);X;X;X;X;X;X;X;X;X;Carbamidomethyl (C);ADP-ribosylation (CDEHKRSTY);X;X;X;X;X	XPPPPPPPPPPPPPPPPPPXXXXXXXXXXXX	GFGYKGSC(1)FHR	GFGY(-106.38)K(-87.36)GS(-35.31)C(35.31)FH(-57.15)R(-190.57)	8	3	0.068617	By MS/MS	By MS/MS	By MS/MS	By MS/MS		By MS/MS
P13010	152	H	XRCC5	X-ray repair cross-complementing protein 5	0.999547	5.43e-08	175.33	151.84	873020000	809740000	255200000	280405000	119942000	250505000	43004;43003;43022;43020;43002;43021;43018;42999;43017;43000;43001;43019	873020000	809740000	255200000	280405000	119942000	250505000							P13010	_SQLDIIIH(ad)SLK_;_SQLDIIIH(ad)SLKK_	P13010	XRCC5	X-ray repair cross-complementing protein 5 OS=Homo sapiens OX=9606 GN=XRCC5 PE=1 SV=3	33.4389	175.33	1	DLSSRFSKSQLDIIIHSLKKCDISLQFFLPF	X;X;X;X;X;X;X;X;X;X;X;X;X;X;X;ADP-ribosylation (CDEHKRSTY);X;X;X;X;Carbamidomethyl (C);X;X;X;X;X;X;X;X;X;X	XXXXXXXXPPPPPPPPPPPPXXXXXXXXXXX	SQLDIIIH(1)SLK	S(-142.9)QLD(-114.82)IIIH(33.44)S(-33.44)LK(-175.33)	8	3	-0.032164	By MS/MS	By MS/MS	By MS/MS	By MS/MS	By MS/MS	By MS/MS
Q9U6Y5	122	R	Q9U6Y5		0.999999	7.41e-22	236.43	218.67			252942000	100698000	190622000	174600000	920;8367;8368;8369;8370;8373;47435;8371;8372;47436			252942000	80938000	190622000	117770000				19760000		56830000	Q9U6Y5	_AEVKFEGDTLVNR(ad)IELK_;_FEGDTLVNR(ad)IELK_;_TRAEVKFEGDTLVNR(ad)IELK_	Q9U6Y5			62.4113	184.87	1	KTRAEVKFEGDTLVNRIELKGIDFKEDGNIL	X;X;ADP-ribosylation (CDEHKRSTY);X;X;X;X;X;X;X;X;X;X;X;X;ADP-ribosylation (CDEHKRSTY);X;X;X;X;X;X;X;X;X;X;X;X;X;X;X	XPPPPPPPPPPPPPPPPPPPXXXXXXXXXXX	FEGDTLVNR(1)IELK	FE(-152.72)GD(-114.19)T(-89.69)LVNR(62.41)IE(-62.41)LK(-184.87)	9	3	0.26426			By MS/MS	By MS/MS	By MS/MS	By MS/MS
Q99877	7	S	HIST1H2BN	Histone H2B;Histone H2B type 1-N	1	1.31e-19	241.51	217.88	755770000	1281155800	250537000	485040000	133537000	466125000	32321;32325;32329;32330;32331;32332;32328;32340;32323;32337;32338;32319;32326;32322;32335;32343;32347;32348;32339;32349;32346;32334;32336;32333;32320;32344;32324;32345;32342	755770000	1274440000	250537000	485040000	133537000	364035000		6715800				102090000	U3KQK0	_PEPSKS(ad)APAPK_;_PEPSKS(ad)APAPKK_;_PEPSKS(ad)APAPKKGSK_;_PEPSKS(ad)APAPKKGSKK_	U3KQK0	HIST1H2BN	Histone H2B OS=Homo sapiens OX=9606 GN=HIST1H2BN PE=1 SV=1;Histone H2B type 1-N OS=Homo sapiens OX=9606 GN=HIST1H2BN PE=1 SV=3	76.2685	192.18	1;2	_________MPEPSKSAPAPKKGSKKAVTKA	X;X;X;X;X;X;X;X;X;X;X;X;X;X;X;ADP-ribosylation (CDEHKRSTY);X;X;X;X;ADP-ribosylation (CDEHKRSTY);ADP-ribosylation (CDEHKRSTY);X;ADP-ribosylation (CDEHKRSTY);X;X;X;X;X;X;X	XXXXXXXXXXPPPPPPPPPPPPPPPPPPPPX	S(1)APAPKKGSKKAVTK	S(76.27)APAPK(-76.27)K(-104.66)GS(-145.29)K(-164.91)K(-175.56)AVT(-191.92)K(-192.18)	1	4	-0.18134	By MS/MS	By MS/MS	By MS/MS	By MS/MS	By MS/MS	By MS/MS
Q08945	651	S	SSRP1	FACT complex subunit SSRP1	0.995445	4.68e-52	312.66	297.11	3240200030	3157650000	249076000	3647820000	136728500	1438781800	23067;23073;23068;23079;23071;44494;23075;44144;44146;13886;13887;44145;44142;44502;44497;23074;44493;23072;23069;13888	3239800000	3157650000		3412660000	131949000	1411730000	400030		249076000	235160000	4779500	27051800	Q08945	_GSSSKS(ad)SSRQLSESFK_;_KSTPSRGSSSKS(ad)SSR_;_KSTPSRGSSSKS(ad)SSRQLSESFK_;_S(ad)SSRQLSESFK_;_STPSRGSSSKS(ad)SSR_;_STPSRGSSSKS(ad)SSRQLSESFK_	Q08945	SSRP1	FACT complex subunit SSRP1 OS=Homo sapiens OX=9606 GN=SSRP1 PE=1 SV=1	23.4441	236.28	1	KMEKKSTPSRGSSSKSSSRQLSESFKSKEFV	X;Oxidation (M);X;X;X;ADP-ribosylation (CDEHKRSTY);X;X;X;X;X;ADP-ribosylation (CDEHKRSTY);ADP-ribosylation (CDEHKRSTY);X;X;ADP-ribosylation (CDEHKRSTY);X;X;X;X;X;X;X;X;X;X;X;X;X;X;X	XXXXPPPPPPPPPPPPPPPPPPPPPPPPXXX	KSTPSRGSSSKS(0.995)S(0.005)SR	K(-224.14)S(-214.6)T(-202.92)PS(-189.38)R(-166.08)GS(-119.2)S(-95.21)S(-66.81)K(-45.91)S(23.44)S(-23.44)S(-45.91)R(-236.28)	12	4	-2.0522	By MS/MS	By MS/MS	By matching	By MS/MS	By MS/MS	By MS/MS
P09651	4	S	HNRNPA1	Heterogeneous nuclear ribonucleoprotein A1;Heterogeneous nuclear ribonucleoprotein A1, N-terminally processed	0.999609	9.99e-14	201.04	179.37	132737000	25402000	241880000	27490000		60921000	42096;42098;42091;42092;39897;39898	132737000	25402000	241880000			60921000				27490000			P09651	_(ac)SKS(ad)ESPKEPEQLRK_;_S(ad)ESPKEPEQLRK_	P09651	HNRNPA1	Heterogeneous nuclear ribonucleoprotein A1 OS=Homo sapiens OX=9606 GN=HNRNPA1 PE=1 SV=5;Heterogeneous nuclear ribonucleoprotein A1 OS=Homo sapiens OX=9606 GN=HNRNPA1 PE=1 SV=2;Isoform A1-A of Heterogeneous nuclear ribonucleoprotein A1 OS=Homo sapiens OX=96	34.4408	201.04	1	____________MSKSESPKEPEQLRKLFIG	X;X;X;X;X;X;X;X;X;X;X;X;X;X;X;ADP-ribosylation (CDEHKRSTY);X;X;X;X;X;X;X;X;X;X;X;X;X;X;X	XXXXXXXXXXXXXPPPPPPPPPPPPPPXXXX	SKS(1)ESPKEPEQLRK	S(-56.04)K(-34.44)S(34.44)E(-45.38)S(-86.34)PK(-95.85)E(-113.96)PE(-138.69)QLR(-191.29)K(-201.04)	3	4	0.36583	By MS/MS	By MS/MS	By MS/MS	By matching		By MS/MS
P38159	341	R	RBMX	RNA-binding motif protein, X chromosome;RNA-binding motif protein, X chromosome, N-terminally processed;RNA binding motif protein, X-linked-like-1	0.99525	1.07e-21	225.33	217.05			238027000	244478200	34064400	145947300	5912;5914;39759;39752;39756;39762;39738;39763;39746;39753;39749;39750			54611000	163043000	18319000	116064000			183416000	81435200	15745400	29883300	P38159	_DR(ad)VGRQER_;_SDLYSSGRDR(ad)VGR_;_SDLYSSGRDR(ad)VGRQER_	P38159	RBMX;RBMXL1	RNA-binding motif protein, X chromosome OS=Homo sapiens OX=9606 GN=RBMX PE=1 SV=3;Isoform 2 of RNA-binding motif protein, X chromosome OS=Homo sapiens OX=9606 GN=RBMX;RNA-binding motif protein, X chromosome OS=Homo sapiens OX=9606 GN=RBMX PE=1 SV=1;RNA bin	23.2127	116.05	1	SYSSSRSDLYSSGRDRVGRQERGLPPSMERG	X;X;X;X;X;X;X;X;X;X;X;X;X;X;X;ADP-ribosylation (CDEHKRSTY);X;X;X;X;X;ADP-ribosylation (CDEHKRSTY);X;X;X;X;X;X;X;X;X	XXXXXXPPPPPPPPPPPPPPPPXXXXXXXXX	D(0.005)R(0.995)VGRQER	D(-23.21)R(23.21)VGR(-87.87)QE(-94.65)R(-116.05)	2	3	-0.067886			By MS/MS	By MS/MS	By MS/MS	By MS/MS
Q9BPY3	218	H	FAM118B	Protein FAM118B	0.999996	7.54e-54	327.3	318.41	335800000	75814000	234760000	156190000	11052000	429993000	27358;27359;27361;27363;27360;27362	335800000		234760000	156190000		429993000		75814000			11052000		E9PIM5	_LSVLHIHGVYTNPSGIVLH(ad)PAGYQNVLR_	E9PIM5	FAM118B	Protein FAM118B (Fragment) OS=Homo sapiens OX=9606 GN=FAM118B PE=1 SV=1;Protein FAM118B OS=Homo sapiens OX=9606 GN=FAM118B PE=1 SV=1;Protein FAM118B (Fragment) OS=Homo sapiens OX=9606 GN=FAM118B PE=1 SV=8;Protein FAM118B OS=Homo sapiens OX=9606 GN=FAM118B	54.8019	200.95	1	LHIHGVYTNPSGIVLHPAGYQNVLRNTEVMR	X;X;X;X;X;X;X;X;X;X;X;X;X;X;X;ADP-ribosylation (CDEHKRSTY);X;X;X;X;X;X;X;X;X;X;X;X;X;X;X	PPPPPPPPPPPPPPPPPPPPPPPPPXXXXXX	LSVLHIHGVYTNPSGIVLH(1)PAGYQNVLR	LS(-179.93)VLH(-161.27)IH(-141.13)GVY(-102.33)T(-87.82)NPS(-63.33)GIVLH(54.8)PAGY(-54.8)QNVLR(-200.95)	19	4	0.87456	By MS/MS	By matching	By MS/MS	By MS/MS	By matching	By MS/MS
[truncated: 1,623 more rows]
[truncated: 50 more columns]

## Sheet: S6 Figure 6d data
accesion	count		sorted count
A2RTX5	1		11
A5PLN9	1		4
B4DX44	1		4
[truncated: 468 more rows]
